# Supplementary material for: Chiral aldehyde catalysis enables direct asymmetric α-substitution reaction of N-unprotected amino acids with halohydrocarbons
Source: Royal Society of Chemistry journal article supplement (doi:10.1039/d3sc01294h), 2023-01-01

## Supporting Information

*for*

### Chiral Aldehyde Catalysis Enables Direct Asymmetric $\alpha$ -Substitution Reaction of *N*-Unprotected Amino Acids with Halohydrocarbons

Hao-Ran Shen, Chao-Xing Li, Xin Jiang, Yao Lin, Jian-Hua Liu, Fang Zhu, Zhu-Lian Wu, Tian Cai, Wei Wen\*,  
Rong-Xing He, Qi-Xiang Guo\*

Key Laboratory of Applied Chemistry of Chongqing Municipality, and Chongqing Key Laboratory of Soft-Matter  
Material Chemistry and Function Manufacturing, School of Chemistry and Chemical Engineering, Southwest  
University, Chongqing, 400715, China.

wenwei1989@swu.edu.cn; qxguo@swu.edu.cn

#### Table of Contents

|                                                                           |           |
|---------------------------------------------------------------------------|-----------|
| <b>1. General data</b> .....                                              | <b>1</b>  |
| <b>2. Reaction condition optimization</b> .....                           | <b>1</b>  |
| <b>3. General procedures for the catalytic asymmetric reactions</b> ..... | <b>9</b>  |
| <b>4. Determination of the absolute configuration</b> .....               | <b>55</b> |
| <b>5. The formal synthesis of (+)-AG-041R</b> .....                       | <b>56</b> |
| <b>6. References</b> .....                                                | <b>59</b> |
| <b>7. The spectra of <sup>1</sup>H NMR and <sup>13</sup>C NMR</b> .....   | <b>60</b> |

## 1. General data

All non-aqueous reactions were carried out in a flame-dried glassware under nitrogen atmosphere or in a nitrogen-filled glove box unless otherwise noted. Solvents for reactions were dried appropriately before use: toluene, THF and Et<sub>2</sub>O were dried by refluxing with sodium and benzophenone as indicator, CH<sub>2</sub>Cl<sub>2</sub> and CHCl<sub>3</sub> were dried by refluxing with CaH<sub>2</sub>. Reagents were purchased from Aladdin, Adamas-beta<sup>®</sup>, Sigma-Aldrich, TCI, Bide or Alfa Aesar and used as received unless otherwise stated. <sup>1</sup>H NMR and <sup>13</sup>C NMR spectra were recorded on Bruker Avance 600 MHz or 400 MHz spectrometer. Chemical shifts ( $\delta$ ) are reported in ppm from tetramethylsilane (TMS) with the solvent resonance as the internal standard. Proton signal multiplicities are given as s (singlet), d (doublet), t (triplet), q (quartet), m (multiplet), br (broad) or a combination of them. *J*-values are in Hz. HRMS (ESI-Q-TOF) spectra were recorded on Bruker Impact-II mass spectrometer. Enantiomer ratios were determined by HPLC (Chiralpak AD-H, IC, OD-H, IG, IA, IH columns were purchased from Daicel Chemical Industries, LTD). Optical rotations were determined at  $\lambda = 589$  nm (sodium D line) by using a Rudolph-API automatic polarimeter. Amino acid esters<sup>[1]</sup>, chiral aldehydes catalysts<sup>[2]</sup> and allylic chloride<sup>[3,4,5]</sup> were prepared according to literature procedures. The racemic samples were prepared by running reactions with a racemic catalyst.

## 2. Reaction condition optimization

### 2.1 Reaction condition optimization for the asymmetric $\alpha$ -arylation

Table S1: Base screening<sup>a</sup>

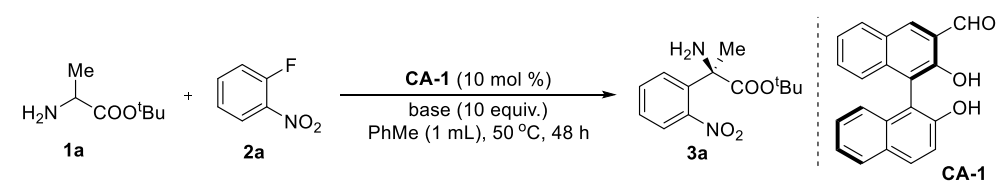

| entry | base                            | time (h) | yield (%) <sup>b</sup> | ee (%) <sup>c</sup> |
|-------|---------------------------------|----------|------------------------|---------------------|
| 1     | TMG <sup>d</sup>                | 48       | N.R. <sup>e</sup>      | N.D. <sup>f</sup>   |
| 2     | DBU <sup>g</sup>                | 48       | N.R.                   | N.D.                |
| 3     | Et <sub>3</sub> N               | 48       | N.R.                   | N.D.                |
| 4     | CH <sub>3</sub> OK              | 48       | N.R.                   | N.D.                |
| 5     | CsOH                            | 48       | N.R.                   | N.D.                |
| 6     | Cs <sub>2</sub> CO <sub>3</sub> | 48       | 25                     | >99                 |
| 7     | K <sub>2</sub> CO <sub>3</sub>  | 48       | Trace                  | N.D.                |
| 8     | LiOH·H <sub>2</sub> O           | 48       | N.R.                   | N.D.                |

|           |                                    |           |           |               |
|-----------|------------------------------------|-----------|-----------|---------------|
| 9         | KF                                 | 48        | N.R.      | N.D.          |
| 10        | KOH                                | 48        | N.R.      | N.D.          |
| 11        | Na <sub>2</sub> CO <sub>3</sub>    | 48        | N.R.      | N.D.          |
| <b>12</b> | <b>K<sub>3</sub>PO<sub>4</sub></b> | <b>48</b> | <b>31</b> | <b>&gt;99</b> |

<sup>a</sup> Unless noted otherwise, reactions were performed with **1a** (0.20 mmol), **2a** (0.10 mmol), **4a** (0.01 mmol) and base (1.0 mmol) in toluene (1.0 mL) at 50 °C. <sup>b</sup> Isolated yield. <sup>c</sup> Determined by chiral HPLC analysis. <sup>d</sup> 1,1,3,3,3-tetramethylguanidine. <sup>e</sup> N.R. = No reaction. <sup>f</sup> N.D. = Not determined. <sup>g</sup> 1,8-Diazabicyclo[5.4.0]undec-7-ene.

**Table S2: Reaction temperature screening<sup>a</sup>**

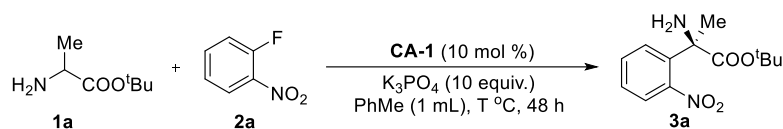

| entry    | T (°C)    | time (h)  | yield (%) <sup>b</sup> | ee (%) <sup>c</sup> |
|----------|-----------|-----------|------------------------|---------------------|
| 1        | 30        | 48        | 23                     | >99                 |
| 2        | 40        | 48        | 26                     | >99                 |
| <b>3</b> | <b>50</b> | <b>48</b> | <b>31</b>              | <b>&gt;99</b>       |
| 4        | 80        | 48        | 16                     | >99                 |
| 5        | 100       | 48        | trace                  | N.D. <sup>d</sup>   |
| 6        | 120       | 48        | trace                  | N.D.                |

<sup>a</sup> Unless noted otherwise, reactions were performed with **1a** (0.20 mmol), **2a** (0.10 mmol), **4a** (0.01 mmol) and K<sub>3</sub>PO<sub>4</sub> (1.0 mmol) in toluene (1.0 mL) at T °C. <sup>b</sup> Isolated yield. <sup>c</sup> Determined by chiral HPLC analysis. <sup>d</sup> N.D. = Not determined.

**Table S3: Solvent screening<sup>a</sup>**

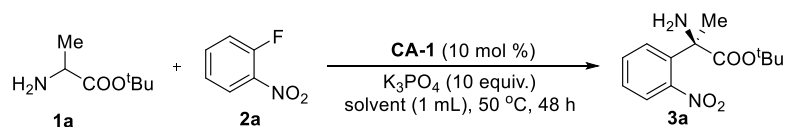

| entry     | solvent                                   | time (h)  | yield (%) <sup>b</sup> | ee (%) <sup>c</sup> |
|-----------|-------------------------------------------|-----------|------------------------|---------------------|
| 1         | mesitylene                                | 48        | 28                     | >99                 |
| 2         | C <sub>6</sub> F <sub>6</sub>             | 48        | 32                     | >99                 |
| 3         | CHCl <sub>3</sub>                         | 48        | 29                     | >99                 |
| 4         | PhF                                       | 48        | 19                     | >99                 |
| 5         | PhCl                                      | 48        | 16                     | >99                 |
| 6         | CH <sub>3</sub> OH                        | 48        | N.R. <sup>e</sup>      | N.D. <sup>d</sup>   |
| 7         | DMF                                       | 48        | trace                  | N.D.                |
| 8         | CH <sub>3</sub> CN                        | 48        | N.R.                   | N.D.                |
| 9         | CH <sub>2</sub> Cl <sub>2</sub>           | 48        | 59                     | >99                 |
| 10        | CCl <sub>4</sub>                          | 48        | 37                     | >99                 |
| 11        | EA                                        | 48        | N.R.                   | N.D.                |
| 12        | CH <sub>2</sub> Cl <sub>2</sub> :PhMe=1:4 | 48        | 36                     | >99                 |
| <b>13</b> | <b>Et<sub>2</sub>O</b>                    | <b>48</b> | <b>86</b>              | <b>&gt;99</b>       |
| 14        | THF                                       | 48        | 21                     | >99                 |
| 15        | <sup>n</sup> Bu <sub>2</sub> O            | 48        | 48                     | >99                 |
| 16        | 1,2-dimethoxyethane                       | 48        | N.R.                   | N.D.                |

|    |             |    |      |      |
|----|-------------|----|------|------|
| 17 | 1,4-dioxane | 48 | N.R. | N.D. |
|----|-------------|----|------|------|

<sup>a</sup> Unless noted otherwise, reactions were performed with **1a** (0.20 mmol), **2a** (0.10 mmol), **4a** (0.01 mmol) and K<sub>3</sub>PO<sub>4</sub> (1.0 mmol) in solvent (1.0 mL) at 50 °C. <sup>b</sup> Isolated yield. <sup>c</sup> Determined by chiral HPLC analysis. <sup>d</sup> N.D. = Not determined. <sup>e</sup> N.R. = No reaction.

**Table S4: Base equivalents screening<sup>a</sup>**

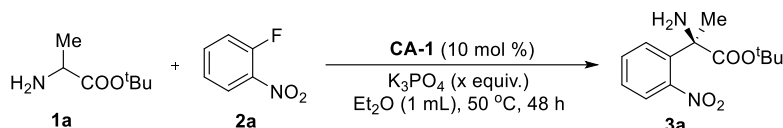

| entry | x  | time (h) | yield (%) <sup>b</sup> | ee (%) <sup>c</sup> |
|-------|----|----------|------------------------|---------------------|
| 1     | 1  | 48       | 65                     | >99                 |
| 2     | 2  | 48       | 73                     | >99                 |
| 3     | 3  | 48       | 81                     | >99                 |
| 4     | 5  | 48       | 86                     | >99                 |
| 5     | 10 | 48       | 86                     | >99                 |
| 6     | 15 | 48       | 78                     | >99                 |

<sup>a</sup> Unless noted otherwise, reactions were performed with **1a** (0.20 mmol), **2a** (0.10 mmol), **4a** (0.01 mmol) and K<sub>3</sub>PO<sub>4</sub> (x equiv.) in Et<sub>2</sub>O (1.0 mL) at 50 °C. <sup>b</sup> Isolated yield. <sup>c</sup> Determined by chiral HPLC analysis.

**Table S5: Reaction concentration screening<sup>a</sup>**

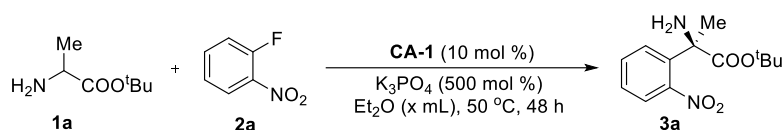

| entry | x   | time (h) | yield (%) <sup>b</sup> | ee (%) <sup>c</sup> |
|-------|-----|----------|------------------------|---------------------|
| 1     | 0.5 | 48       | 78                     | >99                 |
| 2     | 1   | 48       | 86                     | >99                 |
| 3     | 1.5 | 48       | 84                     | >99                 |
| 4     | 2   | 48       | 79                     | >99                 |
| 5     | 3   | 48       | 74                     | >99                 |
| 6     | 4   | 48       | 68                     | >99                 |

<sup>a</sup> Unless noted otherwise, reactions were performed with **1a** (0.20 mmol), **2a** (0.10 mmol), **4a** (0.01 mmol) and K<sub>3</sub>PO<sub>4</sub> (0.50 mmol) in Et<sub>2</sub>O (x mL) at 50 °C. <sup>b</sup> Isolated yield. <sup>c</sup> Determined by chiral HPLC analysis.

## 2.2 Reaction condition optimization for the asymmetric $\alpha$ -allylation

**Table S6: Chiral aldehyde screening**

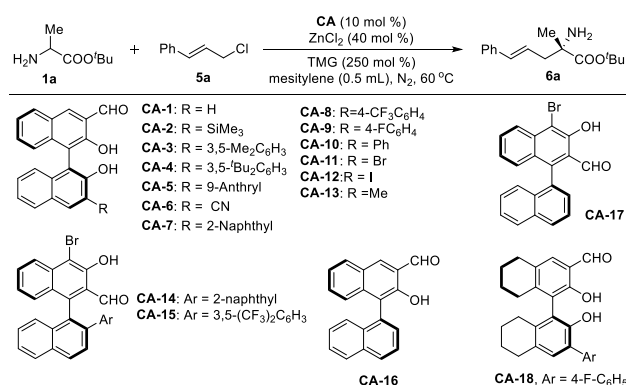

| entry | CA    | time (h) | yield (%) <sup>b</sup> | ee (%) <sup>c</sup> |
|-------|-------|----------|------------------------|---------------------|
| 1     | CA-1  | 8        | 89                     | 16                  |
| 2     | CA-2  | 8        | 96                     | 30                  |
| 3     | CA-3  | 8        | 85                     | 18                  |
| 4     | CA-4  | 8        | 81                     | 4                   |
| 5     | CA-5  | 8.5      | 98                     | 30                  |
| 6     | CA-6  | 8        | 62                     | 78                  |
| 7     | CA-7  | 8        | N.R. <sup>d</sup>      | N.D. <sup>e</sup>   |
| 8     | CA-8  | 8        | 86                     | 12                  |
| 9     | CA-9  | 8        | 88                     | 16                  |
| 10    | CA-10 | 8        | 22                     | 52                  |
| 11    | CA-11 | 8        | 8                      | 22                  |
| 12    | CA-12 | 8        | 19                     | 26                  |
| 13    | CA-13 | 7        | 99                     | 22                  |
| 14    | CA-14 | 8        | 49                     | 84                  |
| 15    | CA-15 | 8        | 61                     | 94                  |
| 16    | CA-16 | 8        | 39                     | 4                   |
| 17    | CA-17 | 8        | 49                     | 58                  |
| 18    | CA-18 | 8        | 38                     | 24                  |

<sup>a</sup> Unless noted otherwise, reactions were performed with **1a** (0.30 mmol), **5a** (0.20 mmol), CA (0.02 mmol), TMG (0.50 mmol), and ZnCl<sub>2</sub> (0.08 mmol) in mesitylene (0.5 mL) at 60 °C. <sup>b</sup> Isolated yield. <sup>c</sup> Determined by chiral HPLC analysis. <sup>d</sup> N.R. = No reaction. <sup>e</sup> N.D. = Not determined.

**Table S7: Base screening<sup>a</sup>**

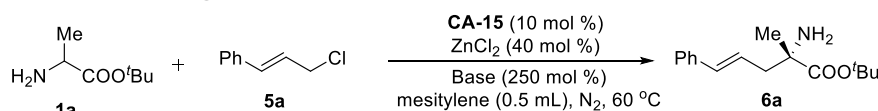

| entry | base                                                                                | time (h) | yield (%) <sup>b</sup> | ee (%) <sup>c</sup> |
|-------|-------------------------------------------------------------------------------------|----------|------------------------|---------------------|
| 1     | TMG                                                                                 | 8        | 49                     | 94                  |
| 2     | 2-'BuTMG <sup>d</sup>                                                               | 9        | trace                  | N.D. <sup>e</sup>   |
| 3     | metformin                                                                           | 8        | 49                     | 98                  |
| 4     | DBN <sup>f</sup>                                                                    | 8.5      | 15                     | 66                  |
| 5     | ectoine                                                                             | 8        | 22                     | 70                  |
| 6     | TBD <sup>g</sup>                                                                    | 9        | 20                     | 94                  |
| 7     | Cs <sub>2</sub> CO <sub>3</sub>                                                     | 11       | trace                  | N.D.                |
| 8     | 'BuOK                                                                               | 10       | trace                  | N.D.                |
| 9     | DBU                                                                                 | 9        | 10                     | 70                  |
| 10    | TMEDA <sup>h</sup>                                                                  | 10       | N.R. <sup>i</sup>      | N.D.                |
| 11    | quinuclidine                                                                        | 9        | N.R.                   | N.D.                |
| 12    |  | 8.5      | 22                     | 70                  |

<sup>a</sup> Unless noted otherwise, reactions were performed with **1a** (0.30 mmol), **5a** (0.20 mmol), CA (0.02 mmol), base (0.50 mmol), and ZnCl<sub>2</sub> (0.08 mmol) in mesitylene (0.5 mL) at 60 °C. <sup>b</sup> Isolated yield. <sup>c</sup> Determined by chiral HPLC analysis. <sup>d</sup> 2-tertbutyl-1,1,3,3-tetramethylguanidine. <sup>e</sup> N.D. = Not determined. <sup>f</sup> 1,5-diazabicyclo[4.3.0]non-5-ene. <sup>g</sup> 1,5,7-Triazabicyclo[4.4.0]dec-5-ene. <sup>h</sup> N,N,N,N'-tetramethylethylenediamine. <sup>i</sup> N.R. = No Reaction.

**Table S8: Lewis acid screening<sup>a</sup>**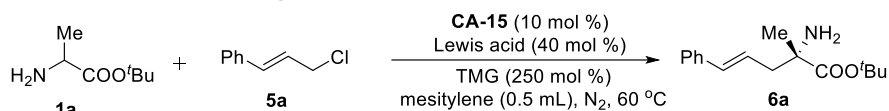

| entry | Lewis acid                                            | time (h) | yield (%) <sup>b</sup> | ee (%) <sup>c</sup> |
|-------|-------------------------------------------------------|----------|------------------------|---------------------|
| 1     | ZnCl <sub>2</sub>                                     | 8        | 49                     | 94                  |
| 2     | Ni(acac) <sub>2</sub>                                 | 8        | trace                  | N.D. <sup>d</sup>   |
| 3     | Cu(OTf) <sub>2</sub>                                  | 8        | N.R. <sup>e</sup>      | N.D.                |
| 4     | MgCl <sub>2</sub>                                     | 8        | 9                      | 62                  |
| 5     | FeCl <sub>3</sub>                                     | 8        | 34                     | 88                  |
| 6     | ZnF <sub>2</sub>                                      | 8        | 42                     | 94                  |
| 7     | ZnBr <sub>2</sub>                                     | 8        | 35                     | 94                  |
| 8     | Zn(OTf) <sub>2</sub>                                  | 8.5      | 24                     | 94                  |
| 9     | Zn(OAc) <sub>2</sub>                                  | 8.5      | 12                     | 94                  |
| 10    | Zn(BF <sub>4</sub> ) <sub>2</sub> ·xH <sub>2</sub> O  | 8        | 22                     | 94                  |
| 11    | Zn(ClO <sub>4</sub> ) <sub>2</sub> ·6H <sub>2</sub> O | 8        | 21                     | 92                  |
| 12    | benzoic acid                                          | 9        | N.R.                   | N.D.                |
| 13    | dipicolinic acid                                      | 9        | N.R.                   | N.D.                |

<sup>a</sup> Unless noted otherwise, reactions were performed with **1a** (0.30 mmol), **5a** (0.20 mmol), **CA** (0.02 mmol), TMG (0.50 mmol), and Lewis acid (0.08 mmol) in mesitylene (0.5 mL) at 60 °C. <sup>b</sup> Isolated yield. <sup>c</sup> Determined by chiral HPLC analysis. <sup>d</sup> N.D. = Not determined. <sup>e</sup> N.R. = No reaction.

**Table S9: Solvent screening**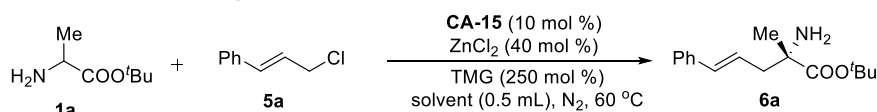

| entry | solvent                          | time (h) | yield (%) <sup>b</sup> | ee (%) <sup>c</sup> |
|-------|----------------------------------|----------|------------------------|---------------------|
| 1     | mesitylene                       | 12       | 61                     | 94                  |
| 2     | toluene                          | 8        | 35                     | 94                  |
| 3     | PhCF <sub>3</sub>                | 12       | 13                     | 85                  |
| 4     | <i>p</i> -xylene                 | 8        | 10                     | 94                  |
| 5     | <i>m</i> -xylene                 | 8        | 22                     | 98                  |
| 6     | <i>o</i> -xylene                 | 8.5      | 28                     | 94                  |
| 7     | THF                              | 8        | 52                     | 90                  |
| 8     | dioxane                          | 8        | 12                     | 96                  |
| 9     | DME                              | 8        | 40                     | 78                  |
| 10    | PhC <sub>2</sub> H <sub>5</sub>  | 8        | 17                     | 96                  |
| 11    | DCE                              | 8.5      | 15                     | 98                  |
| 12    | CH <sub>3</sub> CN               | 4.5      | trace                  | N.D. <sup>d</sup>   |
| 13    | C <sub>2</sub> H <sub>5</sub> OH | 9.5      | 29                     | 96                  |
| 14    | EA                               | 8        | 17                     | 96                  |
| 15    | chlorobenzene                    | 8        | 17                     | 99                  |
| 16    | cyclohexane                      | 10.5     | 37                     | 94                  |
| 17    | <i>n</i> -heptane                | 11       | 49                     | 94                  |
| 18    | methylcyclohexane                | 11       | 36                     | 92                  |

<sup>a</sup> Unless noted otherwise, reactions were performed with **1a** (0.30 mmol), **5a** (0.20 mmol), **CA** (0.02 mmol), TMG (0.50 mmol), and ZnCl<sub>2</sub> (0.08 mmol) in solvent (0.5 mL) at 60 °C. <sup>b</sup> Isolated yield. <sup>c</sup> Determined by chiral HPLC analysis. <sup>d</sup> N.D. = Not determined.

**Table S10: Reaction temperature screening<sup>a</sup>**

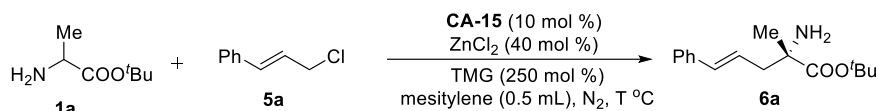

| entry | T (°C) | time (h) | yield (%) <sup>b</sup> | ee (%) <sup>c</sup> |
|-------|--------|----------|------------------------|---------------------|
| 1     | 30     | 40       | N.R. <sup>d</sup>      | N.D. <sup>e</sup>   |
| 2     | 40     | 40       | 46                     | 95                  |
| 3     | 50     | 24       | 65                     | 94                  |
| 4     | 60     | 24       | 61                     | 94                  |
| 5     | 70     | 24       | 58                     | 93                  |
| 6     | 80     | 24       | 39                     | 92                  |

<sup>a</sup> Unless noted otherwise, reactions were performed with **1a** (0.30 mmol), **5a** (0.20 mmol), **CA** (0.02 mmol), TMG (0.50 mmol), and ZnCl<sub>2</sub> (0.08 mmol) in mesitylene (0.5 mL) at T °C. <sup>b</sup> Isolated yield. <sup>c</sup> Determined by chiral HPLC analysis. <sup>d</sup> N.R. = No Reaction. <sup>e</sup> N.D. = Not Determined.

**Table S11: Lewis acid equivalents screening<sup>a</sup>**

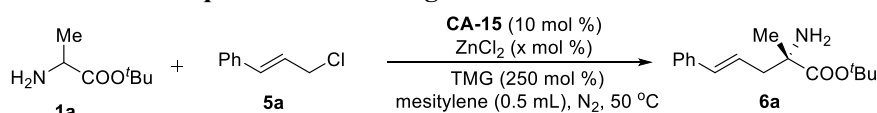

| entry | x   | time (h) | yield (%) <sup>b</sup> | ee (%) <sup>c</sup> |
|-------|-----|----------|------------------------|---------------------|
| 1     | 20  | 24       | 62                     | 94                  |
| 2     | 40  | 24       | 65                     | 94                  |
| 3     | 60  | 24       | 64                     | 94                  |
| 4     | 80  | 24       | 61                     | 94                  |
| 5     | 100 | 24       | 62                     | 94                  |

<sup>a</sup> Unless noted otherwise, reactions were performed with **1a** (0.30 mmol), **5a** (0.20 mmol), **CA** (0.02 mmol), TMG (0.50 mmol), and ZnCl<sub>2</sub> (x mol %) in mesitylene (0.5 mL) at 50 °C. <sup>b</sup> Isolated yield. <sup>c</sup> Determined by chiral HPLC analysis.

**Table S12: Base equivalents screening<sup>a</sup>**

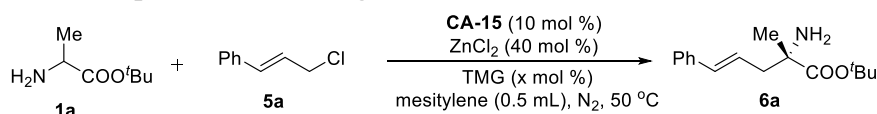

| entry | x   | time (h) | yield (%) <sup>b</sup> | ee (%) <sup>c</sup> |
|-------|-----|----------|------------------------|---------------------|
| 1     | 150 | 24       | 44                     | 94                  |
| 2     | 200 | 24       | 56                     | 94                  |
| 3     | 250 | 24       | 65                     | 94                  |
| 4     | 400 | 24       | 49                     | 89                  |
| 5     | 600 | 24       | 46                     | 88                  |
| 6     | 800 | 24       | 38                     | 88                  |

<sup>a</sup> Unless noted otherwise, reactions were performed with **1a** (0.30 mmol), **5a** (0.20 mmol), **CA** (0.02 mmol), TMG (x mol %), and ZnCl<sub>2</sub> (0.08 mmol) in mesitylene (0.5 mL) at 50 °C. <sup>b</sup> Isolated yield. <sup>c</sup> Determined by chiral HPLC analysis.

**Table S13: Reactant concentration screening<sup>a</sup>**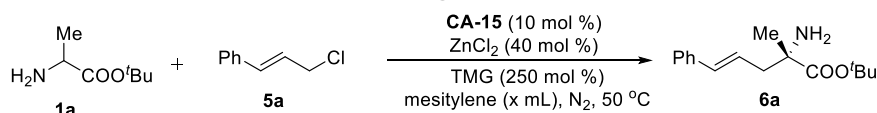

| entry    | x          | time (h)  | yield (%) <sup>b</sup> | ee (%) <sup>c</sup> |
|----------|------------|-----------|------------------------|---------------------|
| 1        | 0.5        | 24        | 65                     | 94                  |
| 2        | 0.4        | 24        | 70                     | 94                  |
| 3        | 0.3        | 24        | 59                     | 94                  |
| 4        | 0.2        | 24        | 39                     | 93                  |
| <b>5</b> | <b>0.4</b> | <b>48</b> | <b>73</b>              | <b>94</b>           |

<sup>a</sup> Unless noted otherwise, reactions were performed with **1a** (0.30 mmol), **5a** (0.20 mmol), **CA** (0.02 mmol), TMG (0.50 mmol), and ZnCl<sub>2</sub> (0.08 mmol) in mesitylene (x mL) at 50 °C. <sup>b</sup> Isolated yield. <sup>c</sup> Determined by chiral HPLC analysis.

### 2.3 Reaction optimization for the asymmetric $\alpha$ -benzylation

**Table S14: Chiral aldehyde screening<sup>a</sup>**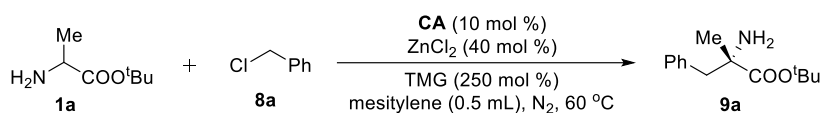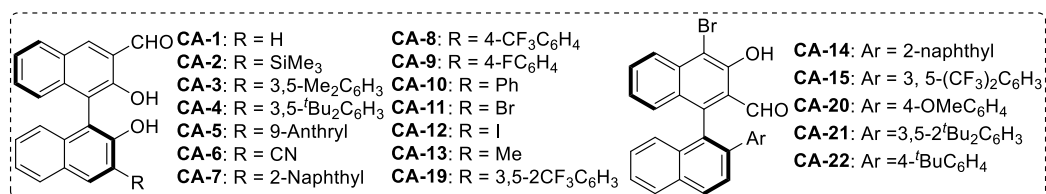

| entry     | CA           | time (h)  | yield (%) <sup>b</sup> | ee (%) <sup>c</sup> |
|-----------|--------------|-----------|------------------------|---------------------|
| 1         | <b>CA-1</b>  | 12        | 15                     | 5                   |
| 2         | <b>CA-2</b>  | 12        | 68                     | 25                  |
| 3         | <b>CA-3</b>  | 12        | 85                     | 18                  |
| 4         | <b>CA-4</b>  | 12        | 57                     | 0                   |
| 5         | <b>CA-5</b>  | 11.5      | 57                     | 47                  |
| 6         | <b>CA-6</b>  | 12        | 18                     | 78                  |
| 7         | <b>CA-7</b>  | 12        | 34                     | 46                  |
| 8         | <b>CA-8</b>  | 11.5      | 55                     | 12                  |
| 9         | <b>CA-9</b>  | 12.5      | 75                     | 17                  |
| 10        | <b>CA-10</b> | 12        | 22                     | 48                  |
| 11        | <b>CA-11</b> | 13.5      | trace                  | N.D. <sup>d</sup>   |
| 12        | <b>CA-12</b> | 11.5      | 6                      | 22                  |
| 13        | <b>CA-13</b> | 12        | 48                     | 14                  |
| 14        | <b>CA-14</b> | 12        | 23                     | 83                  |
| <b>15</b> | <b>CA-15</b> | <b>11</b> | <b>20</b>              | <b>88</b>           |
| 16        | <b>CA-20</b> | 8         | 20                     | 88                  |
| 17        | <b>CA-21</b> | 8         | 10                     | 90                  |
| 18        | <b>CA-22</b> | 8         | 14                     | 86                  |

<sup>a</sup> Unless noted otherwise, reactions were performed with **1a** (0.30 mmol), **8a** (0.20 mmol), **CA** (0.02 mmol), TMG (0.50 mmol), and ZnCl<sub>2</sub> (0.08 mmol) in mesitylene (0.5 mL) at 60 °C. <sup>b</sup> Isolated yield. <sup>c</sup> Determined by chiral HPLC



analysis. <sup>d</sup>N.D. = Not determined.

**Table S15: Base screening<sup>a</sup>**

| entry | base                            | time (h)  | yield (%) <sup>b</sup> | ee (%) <sup>c</sup> |
|-------|---------------------------------|-----------|------------------------|---------------------|
| 1     | <b>TMG</b>                      | <b>12</b> | <b>34</b>              | <b>86</b>           |
| 2     | metformin                       | 13.5      | trace                  | N.D. <sup>d</sup>   |
| 3     | DBN <sup>e</sup>                | 11.5      | trace                  | N.D.                |
| 4     | TDMAIP <sup>f</sup>             | 11.5      | trace                  | N.D.                |
| 5     | TBD                             | 12        | trace                  | N.D.                |
| 6     | Cs <sub>2</sub> CO <sub>3</sub> | 12        | trace                  | N.D.                |
| 7     | <sup>t</sup> BuOK               | 10.5      | N.R. <sup>g</sup>      | N.D.                |
| 8     | MTBD <sup>h</sup>               | 10        | 11                     | 78                  |
| 9     | DBU                             | 13        | 18                     | 77                  |
| 10    | MTMG                            | 12        | trace                  | N.D.                |
| 11    | TEA                             | 7.5       | N.R.                   | N.D.                |
| 12    | TMEDA <sup>i</sup>              | 7.5       | N.R.                   | N.D.                |
| 13    |                                 | 11.5      | trace                  | N.D.                |

<sup>a</sup> Unless noted otherwise, reactions were performed with **1a** (0.30 mmol), **8a** (0.20 mmol), **CA-15** (0.02 mmol), base (0.50 mmol), and ZnCl<sub>2</sub> (0.08 mmol) in mesitylene (0.5 mL) at 60 °C. <sup>b</sup> Isolated yield. <sup>c</sup> Determined by chiral HPLC analysis. <sup>d</sup> N.D. = Not Determined. <sup>e</sup> 1,5-diazabicyclo [4.3.0] non-5-ene. <sup>f</sup> Iminotris(dimethylamino)phosphorane. <sup>g</sup> N.R. = No Reaction. <sup>h</sup> 7-Methyl-1,5,7-triazabicyclo[4.4.0]decene-5. <sup>i</sup> N,N,N,N'-tetramethylethylenediamine.

**Table S16: Solvent screening<sup>a</sup>**

| entry | solvent                          | time (h) | yield (%) <sup>b</sup> | ee (%) <sup>c</sup> |
|-------|----------------------------------|----------|------------------------|---------------------|
| 1     | mesitylene                       | 11       | 20                     | 88                  |
| 2     | toluene                          | 12       | 34                     | 86                  |
| 3     | PhCF <sub>3</sub>                | 12       | 13                     | 85                  |
| 4     | <i>p</i> -xylene                 | 12       | 15                     | 86                  |
| 5     | <i>m</i> -xylene                 | 12       | trace                  | N.D. <sup>d</sup>   |
| 6     | <i>o</i> -xylene                 | 13.5     | 33                     | 85                  |
| 7     | THF                              | 12.5     | 45                     | 78                  |
| 8     | dioxane                          | 12       | trace                  | N.D.                |
| 9     | DME                              | 12       | trace                  | N.D.                |
| 10    | PhC <sub>2</sub> H <sub>5</sub>  | 12.5     | 34                     | 75                  |
| 11    | DCE                              | 12.5     | trace                  | N.D.                |
| 12    | CH <sub>3</sub> CN               | 12       | 15                     | 82                  |
| 13    | C <sub>2</sub> H <sub>5</sub> OH | 12       | trace                  | N.D.                |
| 14    | EA                               | 12.5     | 30                     | 74                  |
| 15    | chlorobenzene                    | 12.5     | 16                     | 75                  |

|    |                        |      |    |    |
|----|------------------------|------|----|----|
| 16 | cyclohexane            | 12.5 | 55 | 86 |
| 17 | octane                 | 12   | 48 | 90 |
| 18 | methylcyclohexane      | 10.5 | 52 | 91 |
| 19 | <i>n</i> -hexane       | 13.5 | 60 | 90 |
| 20 | <i>n</i> -heptane      | 11.5 | 52 | 89 |
| 21 | 2,2,4-trimethylpentane | 11.5 | 45 | 90 |

<sup>a</sup> Unless noted otherwise, reactions were performed with **1a** (0.30 mmol), **8a** (0.20 mmol), **CA-15** (0.02 mmol), TMG (0.50 mmol), and ZnCl<sub>2</sub> (0.08 mmol) in solvent (0.5 mL) at 60 °C. <sup>b</sup> Isolated yield. <sup>c</sup> Determined by chiral HPLC analysis. <sup>d</sup> N.D. = Not determined.

**Table S17: Alkoxy group screening<sup>a</sup>**

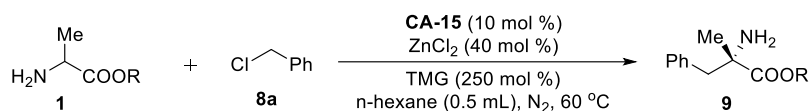

| entry | R               | time (h) | yield (%) <sup>b</sup> | ee (%) <sup>c</sup> |
|-------|-----------------|----------|------------------------|---------------------|
| 1     | <sup>t</sup> Bu | 13.5     | 60                     | 90                  |
| 2     | Me              | 11       | trace                  | N.D. <sup>d</sup>   |
| 3     | Et              | 11       | trace                  | N.D.                |
| 4     | <sup>i</sup> Pr | 11       | 22                     | 89                  |
| 5     | Bn              | 11       | trace                  | N.D.                |
| 6     | CF <sub>3</sub> | 10.5     | N.R. <sup>e</sup>      | N.D.                |

<sup>a</sup> Unless noted otherwise, reactions were performed with **1** (0.30 mmol), **8a** (0.20 mmol), **CA-15** (0.02 mmol), TMG (0.50 mmol), and ZnCl<sub>2</sub> (0.08 mmol) in <sup>n</sup>Hexane (0.5 mL) at 60 °C. <sup>b</sup> Isolated yield. <sup>c</sup> Determined by chiral HPLC analysis. <sup>d</sup> N.D. = Not determined. <sup>e</sup> N.R. = No reaction.

**Table S18: Reaction temperature screening**

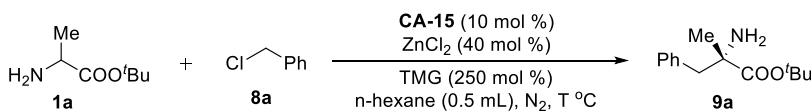

| entry | T (°C) | time (h) | yield (%) <sup>b</sup> | ee (%) <sup>c</sup> |
|-------|--------|----------|------------------------|---------------------|
| 1     | 50     | 24       | 67                     | 90                  |
| 2     | 50     | 48       | 71                     | 90                  |
| 3     | 60     | 13.5     | 60                     | 90                  |
| 4     | 60     | 24       | 61                     | 89                  |
| 5     | 60     | 48       | 58                     | 88                  |
| 6     | 80     | 24       | 55                     | 83                  |

<sup>a</sup> Unless noted otherwise, reactions were performed with **1** (0.30 mmol), **8a** (0.20 mmol), **CA-15** (0.02 mmol), TMG (0.50 mmol), and ZnCl<sub>2</sub> (0.08 mmol) in <sup>n</sup>Hexane (0.5 mL) at T °C. <sup>b</sup> Isolated yield. <sup>c</sup> Determined by chiral HPLC analysis.

### 3. General procedures for the catalytic asymmetric reactions

#### 3.1 General procedure for the asymmetric $\alpha$ -arylation

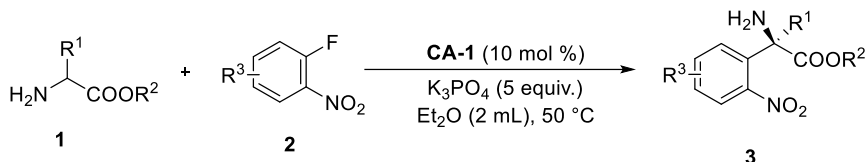

Chiral aldehyde catalyst (6.3 mg, 0.02 mmol), amino acid ester (0.4 mmol), Et<sub>2</sub>O (2 mL) and K<sub>3</sub>PO<sub>4</sub> (212 mg, 1 mmol) were successively added to a 10 mL reaction tube with stirring magneton. The mixture was stirred at room temperature for 10 minutes, then nitrobenzene derivative **2** (0.2 mmol) was added. The reaction system was sealed and continuously stirred at 50 °C. After the reaction completed (detected by TLC), the solvent was removed by rotary evaporation, and the residue was purified by flash chromatography column on silica gel (eluent: petroleum ether/ ethyl acetate/ triethylamine =200/100/3).

***tert*-Butyl (*S*)-2-amino-2-(2-nitrophenyl)propanoate (**3a**):**

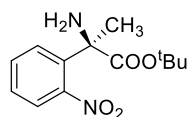

A pale yellow oil (45.8 mg, 86%); R<sub>f</sub> = 0.30 (petroleum ether/ ethyl acetate = 2:1);

the enantiomeric excess was determined to be >99% by HPLC analysis on Daicel

Chirapak IC column (hexane/isopropanol = 70/30, flow rate 1.0 mL/min, T = 30

°C), UV 254 nm, t<sub>R</sub>(major) 7.186 min; [α]<sub>D</sub><sup>25</sup> = -58.93 (c = 0.67, CHCl<sub>3</sub>); <sup>1</sup>H NMR (600 MHz, CDCl<sub>3</sub>) δ 7.91 (d, J = 6.0 Hz, 1H), 7.87 (d, J = 6.0 Hz, 1H), 7.60 (t, J = 6.0 Hz, 1H), 7.42 (t, J = 6.0 Hz, 1H), 2.02 (s, 2H), 1.77 (s, 3H), 1.41 (s, 9H); <sup>13</sup>C NMR (151 MHz, CDCl<sub>3</sub>) δ 173.81, 148.84, 138.88, 132.82, 128.45, 128.03, 124.95, 82.10, 60.27, 27.87, 27.59. HRMS(ESI) m/z: [M+H]<sup>+</sup> calculated for C<sub>14</sub>H<sub>21</sub>N<sub>2</sub>O<sub>4</sub><sup>+</sup> 267.1334; found 267.1349.

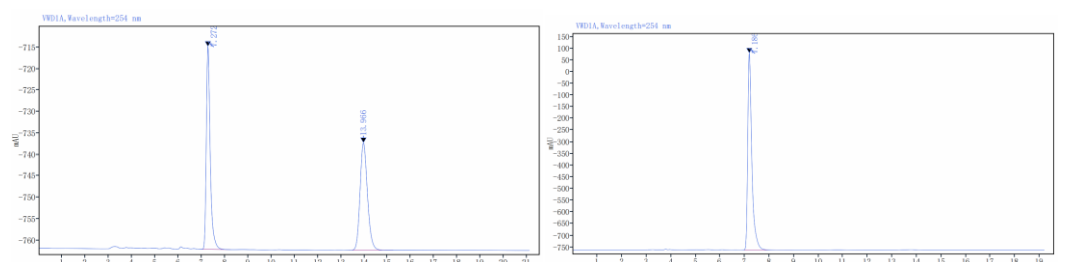

| Peak | RetTime [min] | Type | Width[min] | Area[mAU*s] | Height[mAU] | Area%   | Peak | RetTime [min] | Type | Width[min] | Area[mAU*s] | Height[mAU] | Area%    |
|------|---------------|------|------------|-------------|-------------|---------|------|---------------|------|------------|-------------|-------------|----------|
|      | 7.272         | BB   | 1.2767     | 552.2866    | 47.3565     | 49.8839 |      | 7.186         | BB   | 2.1667     | 9775.4456   | 841.3780    | 100.0000 |
|      | 13.966        | BB   | 1.9200     | 554.8573    | 25.0522     | 50.1161 |      |               |      |            |             |             |          |

**Isopropyl (*S*)-2-amino-2-(2-nitrophenyl)propanoate (**3b**):**

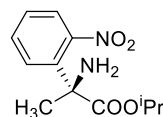

A pale yellow oil (36.4 mg, 72%); R<sub>f</sub> = 0.38 (petroleum ether/ ethyl acetate = 2:1);

the enantiomeric excess was determined to be 98% by HPLC analysis on Daicel

Chirapak IC column (hexane/isopropanol = 70/30, flow rate 1.0 mL/min, T = 30 °C), UV 254 nm,  $t_R$ (major) 8.362 min,  $t_R$ (minor) 14.792 min;  $[\alpha]_D^{25} = -65.85$  (c = 0.33, CHCl<sub>3</sub>); <sup>1</sup>H NMR (600 MHz, CDCl<sub>3</sub>) δ 7.93 (d, J = 6.0 Hz, 1H), 7.89 (d, J = 6.0 Hz, 1H), 7.62 (t, J = 9.0 Hz, 1H), 7.43 (t, J = 9.0 Hz, 1H), 4.99 – 5.05 (m, 1H), 2.09 (s, 2H), 1.79 (s, 3H), 1.18 – 1.21 (m, 6H). <sup>13</sup>C NMR (151 MHz, CDCl<sub>3</sub>) δ 174.26, 148.66, 138.69, 132.97, 128.40, 128.21, 125.12, 69.33, 59.85, 27.80, 21.43, 21.39. HRMS(ESI) m/z: [M+H]<sup>+</sup> Calculated for C<sub>11</sub>H<sub>17</sub>N<sub>2</sub>O<sub>4</sub><sup>+</sup> 253.1183; found 253.1189.

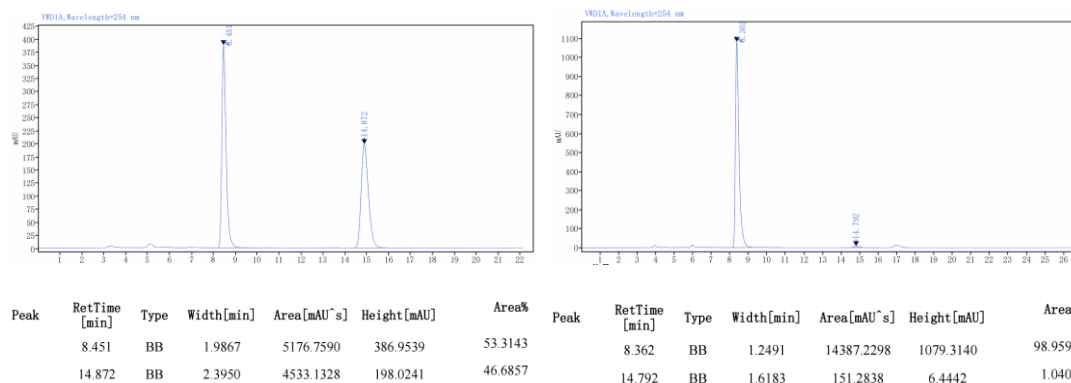

### Benzyl (S)-2-amino-2-(2-nitrophenyl)propanoate (3c):

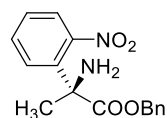

A pale yellow oil (35.5 mg, 59%);  $R_f = 0.29$  (petroleum ether/ ethyl acetate = 2:1);

the enantiomeric excess was determined to be 97% by HPLC analysis on Daicel Chirapak IC column (hexane/isopropanol = 70/30, flow rate 1.0 mL/min, T = 30 °C), UV 254 nm,  $t_R$ (major) 19.592 min,  $t_R$ (minor) 12.693 min;  $[\alpha]_D^{25} = -77.13$  (c = 0.36, CHCl<sub>3</sub>); <sup>1</sup>H NMR (600 MHz, CDCl<sub>3</sub>) δ 7.92 (d, J = 12.0 Hz, 1H), 7.88 (d, J = 6.0 Hz, 1H), 7.60 (t, J = 9.0 Hz, 1H), 7.43 (t, J = 9.0 Hz, 1H), 7.34 – 7.24 (m, 5H), 5.12 (s, 2H), 1.99 (s, 2H), 1.80 (s, 3H); <sup>13</sup>C NMR (151 MHz, CDCl<sub>3</sub>) δ 174.64, 148.69, 138.50, 135.49, 133.04, 128.53, 128.40, 128.36, 128.32, 125.15, 67.28, 59.94, 27.79; HRMS(ESI) m/z: [M+H]<sup>+</sup> Calculated for C<sub>16</sub>H<sub>17</sub>N<sub>2</sub>O<sub>4</sub><sup>+</sup> 301.1183; found 301.1189.

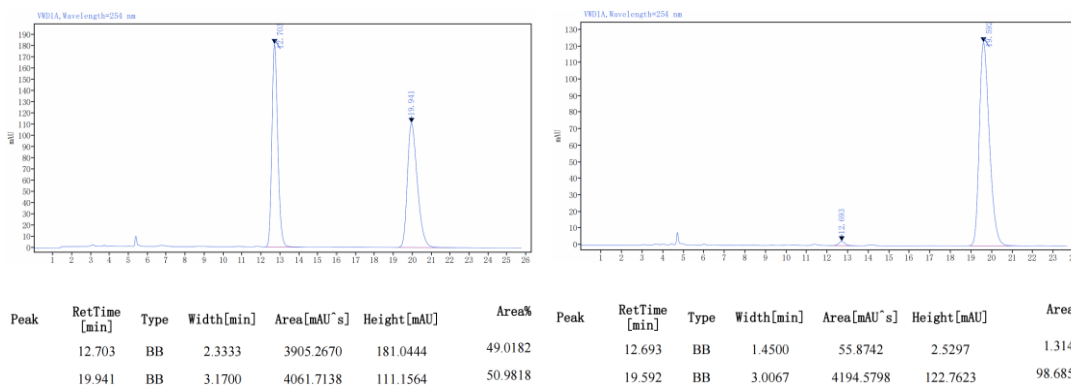

### Ethyl (*S*)-2-amino-2-(2-nitrophenyl)propanoate (**3d**):

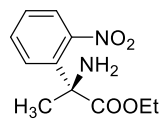

A pale yellow oil (39.1 mg, 82%);  $R_f = 0.29$  (petroleum ether/ ethyl acetate = 2:1);

the enantiomeric excess was determined to be 98% by HPLC analysis on Daicel

Chirapak IC column (hexane/isopropanol = 70/30, flow rate 1.0 mL/min,  $T = 30\text{ }^\circ\text{C}$ ),

UV 254 nm,  $t_R(\text{major})$  11.767 min,  $t_R(\text{minor})$  25.945 min;  $[\alpha]_D^{25} = -105.0$  ( $c = 0.30$ ,  $\text{CHCl}_3$ );  $^1\text{H}$

**NMR (600 MHz,  $\text{CDCl}_3$ )**  $\delta$  7.94 (d,  $J = 6.0$  Hz, 1H), 7.89 (d,  $J = 6.0$  Hz, 1H), 7.62 (t,  $J = 6.0$  Hz,

1H), 7.44 (t,  $J = 6.0$  Hz, 1H), 4.18 – 4.14 (m, 2H), 2.13 (s, 2H), 1.81 (s, 3H), 1.22 (t,  $J = 6.0$  Hz,

3H);  $^{13}\text{C}$  **NMR (151 MHz,  $\text{CDCl}_3$ )** 174.70, 148.70, 138.45, 133.00, 128.40, 128.32, 125.09, 61.64,

59.79, 27.77, 13.89; **HRMS(ESI)**  $m/z$ :  $[\text{M}+\text{H}]^+$  Calculated for  $\text{C}_{11}\text{H}_{15}\text{N}_2\text{O}_4^+$  239.1026; found

239.1038.

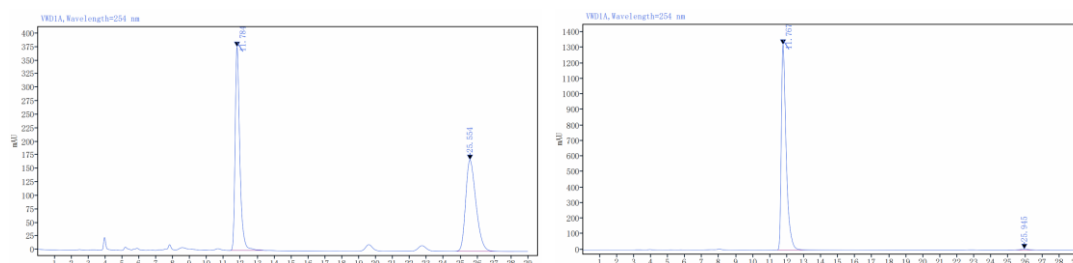

| Peak | RetTime [min] | Type | Width [min] | Area [mAU*s] | Height [mAU] | Area%   | Peak | RetTime [min] | Type | Width [min] | Area [mAU*s] | Height [mAU] | Area%   |
|------|---------------|------|-------------|--------------|--------------|---------|------|---------------|------|-------------|--------------|--------------|---------|
|      | 11.784        | BB   | 2.2567      | 7239.8510    | 375.9946     | 50.3076 |      | 11.767        | BB   | 4.0700      | 26333.5436   | 1321.4667    | 99.2166 |
|      | 25.554        | BB   | 3.6267      | 7151.3175    | 168.7961     | 49.6924 |      | 25.945        | BB   | 2.4417      | 207.9375     | 4.9166       | 0.7834  |

### Methyl (*S*)-2-amino-2-(2-nitrophenyl)propanoate (**3e**):

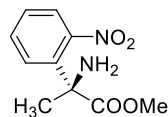

A pale yellow oil (26.2 mg, 52%);  $R_f = 0.26$  (petroleum ether/ ethyl acetate = 2:1);

the enantiomeric excess was determined to be 96% by HPLC analysis on Daicel

Chirapak IC column (hexane/isopropanol = 70/30, flow rate 1.0 mL/min,  $T =$

$30\text{ }^\circ\text{C}$ ), UV 254 nm,  $t_R(\text{major})$  12.437 min,  $t_R(\text{minor})$  29.962 min;  $[\alpha]_D^{25} = -85.43$  ( $c = 0.30$ ,  $\text{CHCl}_3$ );

$^1\text{H}$  **NMR (600 MHz,  $\text{CDCl}_3$ )**  $\delta$  7.93 (d,  $J = 6.0$  Hz, 1H), 7.88 (d,  $J = 6.0$  Hz, 1H), 7.62 (t,  $J = 9.0$

Hz, 1H), 7.45 (t,  $J = 9.0$  Hz, 1H), 3.70 (s, 3H), 1.97 (s, 2H), 1.80 (s, 3H);  $^{13}\text{C}$  **NMR (151 MHz,**

**$\text{CDCl}_3$ )**  $\delta$  175.31, 148.71, 138.49, 132.99, 128.35, 128.27, 125.09, 59.75, 52.42, 27.86; **HRMS(ESI)**

$m/z$ :  $[\text{M}+\text{H}]^+$  Calculated for  $\text{C}_{10}\text{H}_{13}\text{N}_2\text{O}_4^+$  225.0870; found 225.0878.

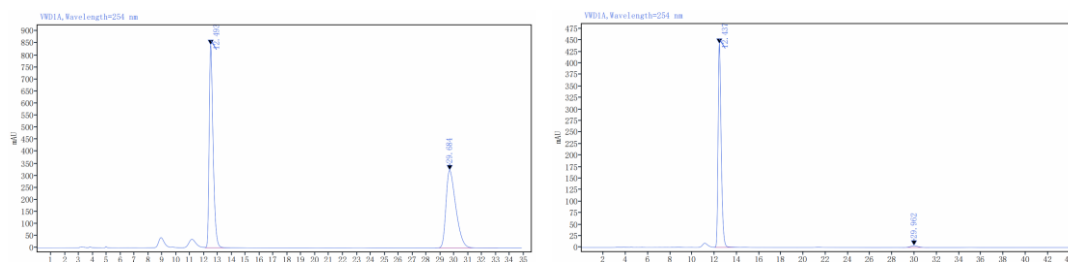

| Peak | RetTime [min] | Type | Width [min] | Area [mAU*s] | Height [mAU] | Area%   |
|------|---------------|------|-------------|--------------|--------------|---------|
|      | 12.493        | VB   | 1.8037      | 16474.6703   | 841.0386     | 51.1513 |
|      | 29.684        | BB   | 4.5250      | 15733.0823   | 321.9173     | 48.8487 |

| Peak | RetTime [min] | Type | Width [min] | Area [mAU*s] | Height [mAU] | Area%   |
|------|---------------|------|-------------|--------------|--------------|---------|
|      | 12.437        | VB   | 2.2537      | 8610.1116    | 441.9469     | 97.9992 |
|      | 29.962        | BB   | 2.4100      | 175.7885     | 3.8661       | 2.0008  |

### *tert*-Butyl (*S*)-2-amino-2-(2-nitrophenyl)butanoate (**3f**):

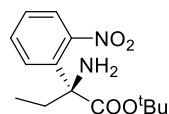

A pale yellow oil (48.7 mg, 87%);  $R_f = 0.31$  (petroleum ether/ ethyl acetate = 2:1);

the enantiomeric excess was determined to be 98% by HPLC analysis on Daicel

Chirapak IC column (hexane/isopropanol = 70/30, flow rate 1.0 mL/min,  $T = 30\text{ }^\circ\text{C}$ ), UV 254 nm,

$t_R(\text{major})$  7.077 min;  $[\alpha]_D^{25} = -38.53$  ( $c = 0.78$ ,  $\text{CHCl}_3$ );  $^1\text{H NMR}$  (600 MHz,  $\text{CDCl}_3$ )  $\delta$  7.83 – 7.77

(m, 2H), 7.57 (t,  $J = 6.0$  Hz, 1H), 7.40 (t,  $J = 6.0$  Hz, 1H), 2.23 – 2.29 (m, 1H), 2.13 – 2.60 (m, 1H),

2.08 (s, 2H), 1.42 (s, 9H), 0.90 (t,  $J = 6.0$  Hz, 3H);  $^{13}\text{C NMR}$  (151 MHz,  $\text{CDCl}_3$ )  $\delta$  172.92, 149.79,

136.97, 132.09, 129.25, 127.96, 124.95, 82.28, 63.29, 32.00, 27.69, 8.23; **HRMS(ESI)**  $m/z$ :  $[\text{M}+\text{H}]^+$

Calculated for  $\text{C}_{14}\text{H}_{21}\text{N}_2\text{O}_4^+$  281.1496; found 281.1501.

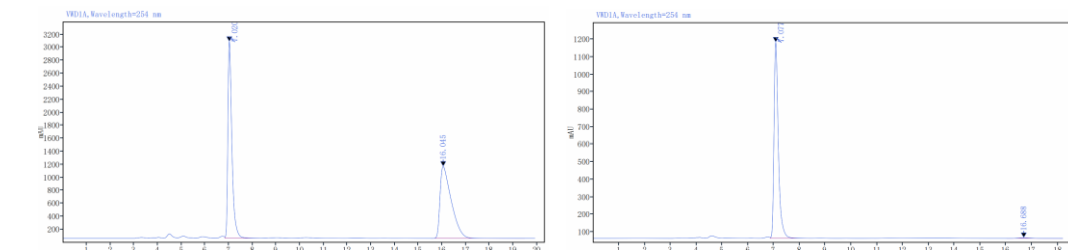

| Peak | RetTime [min] | Type | Width [min] | Area [mAU*s] | Height [mAU] | Area%   |
|------|---------------|------|-------------|--------------|--------------|---------|
|      | 7.020         | VB   | 1.4479      | 35689.9874   | 3024.2858    | 49.5529 |
|      | 16.045        | BB   | 3.9533      | 36334.0373   | 1106.0608    | 50.4471 |

| Peak | RetTime [min] | Type | Width [min] | Area [mAU*s] | Height [mAU] | Area%   |
|------|---------------|------|-------------|--------------|--------------|---------|
|      | 7.077         | VB   | 1.6070      | 13063.0818   | 1119.9107    | 99.1922 |
|      | 16.688        | BBA  | 2.1767      | 106.3798     | 3.6638       | 0.8078  |

### Ethyl (*S*)-2-amino-2-(2-nitrophenyl)butanoate (**3g**):

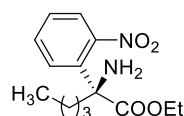

A pale yellow oil (33.3 mg, 54%);  $R_f = 0.49$  (petroleum ether/ ethyl acetate =

2:1); the enantiomeric excess was determined to be 95% by HPLC analysis on

Daicel Chirapak IC column (hexane/isopropanol = 70/30, flow rate 1.0 mL/min,

$T = 30\text{ }^\circ\text{C}$ ), UV 254 nm,  $t_R(\text{major})$  11.379 min,  $t_R(\text{minor})$  20.724 min;  $[\alpha]_D^{25} = -6.18$  ( $c = 0.36$ ,

$\text{CHCl}_3$ );  $^1\text{H NMR}$  (600 MHz,  $\text{CDCl}_3$ )  $\delta$  7.83 – 7.80 (m, 2H), 7.59 (t,  $J = 6.0$  Hz, 1H), 7.42 (t,  $J =$

6.0 Hz, 1H), 4.21 – 4.12 (m, 2H), 2.22 – 2.11 (m, 2H), 1.97 (s, 2H), 1.36 – 1.26 (m, 2H), 1.22 (t,  $J =$

6.0 Hz, 3H), 1.17 – 1.10 (m, 1H), 0.89 (t,  $J = 6.0$  Hz, 3H);  $^{13}\text{C NMR}$  (151 MHz,  $\text{CDCl}_3$ )  $\delta$  174.17,

149.53, 137.01, 132.29, 129.07, 128.17, 125.01, 62.60, 61.50, 38.88, 25.94, 22.89, 13.94, 13.85.

**HRMS(ESI) m/z:**  $[M+H]^+$  Calculated for  $C_{14}H_{21}N_2O_4^+$  281.1496; found 281.1502.

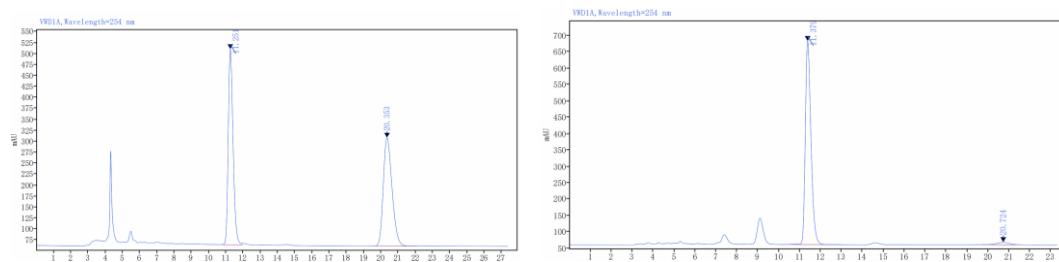

| Peak | RetTime [min] | Type | Width[min] | Area[mAU*s] | Height[mAU] | Area%   | Peak | RetTime [min] | Type | Width[min] | Area[mAU*s] | Height[mAU] | Area%   |
|------|---------------|------|------------|-------------|-------------|---------|------|---------------|------|------------|-------------|-------------|---------|
|      | 11.251        | BV   | 1.2957     | 8668.1270   | 445.5077    | 49.8777 |      | 11.379        | BB   | 2.9600     | 11698.5125  | 621.6781    | 97.5436 |
|      | 20.353        | BB   | 2.5967     | 8710.6382   | 246.5980    | 50.1223 |      | 20.724        | BB   | 2.6000     | 294.6036    | 7.0823      | 2.4564  |

### Ethyl (*S*)-2-amino-2-(2-nitrophenyl)butanoate (**3h**):

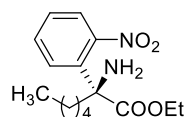

A pale yellow oil (41.2 mg, 64%);  $R_f = 0.48$  (petroleum ether/ ethyl acetate = 2:1);

the enantiomeric excess was determined to be 99% by HPLC analysis on Daicel

Chirapak IC column (hexane/isopropanol = 70/30, flow rate 1.0 mL/min, T = 30

$^{\circ}C$ ), UV 254 nm,  $t_R$ (major) 13.929 min,  $t_R$ (minor) 25.271 min;  $[\alpha]_D^{25} = -13.13$  (c = 0.72,  $CHCl_3$ );

$^1H$  NMR (600 MHz,  $CDCl_3$ )  $\delta$  7.83 – 7.79 (m, 2H), 7.59 (t,  $J = 6.0$  Hz, 1H), 7.42 (t,  $J = 6.0$  Hz, 1H), 4.16 (m, 2H), 2.22 – 2.09 (m, 2H), 2.06 (s, 2H), 1.30 (m, 5H), 1.21 (t,  $J = 9.0$  Hz, 3H), 1.16

(m, 1H), 0.89 – 0.83 (m, 3H);  $^{13}C$  NMR (151 MHz,  $CDCl_3$ )  $\delta$  174.18, 149.55, 137.09, 132.24,

129.05, 128.13, 124.98, 62.64, 61.46, 39.13, 31.96, 23.42, 22.37, 13.92, 13.86. **HRMS(ESI) m/z:**

$[M+H]^+$  Calculated for  $C_{15}H_{23}N_2O_4^+$  295.1652; found 295.1674.

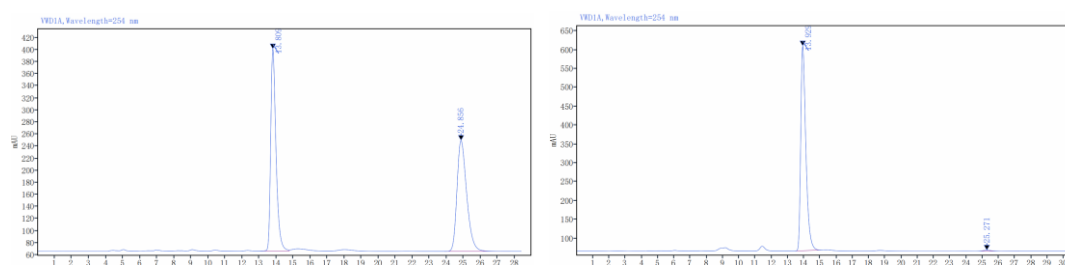

| Peak | RetTime [min] | Type | Width[min] | Area[mAU*s] | Height[mAU] | Area%   | Peak | RetTime [min] | Type | Width[min] | Area[mAU*s] | Height[mAU] | Area%   |
|------|---------------|------|------------|-------------|-------------|---------|------|---------------|------|------------|-------------|-------------|---------|
|      | 13.809        | BV   | 1.6997     | 7257.5436   | 334.8495    | 50.0570 |      | 13.929        | BB   | 1.5583     | 11905.1486  | 542.9634    | 99.3998 |
|      | 24.856        | BB   | 3.8733     | 7241.0190   | 183.6259    | 49.9430 |      | 25.271        | BB   | 2.7467     | 71.8839     | 1.7647      | 0.6002  |

### Ethyl (*S*)-2-amino-2-(2-nitrophenyl)butanoate (**3i**):

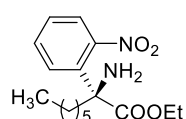

A pale yellow oil (43.9 mg, 65%);  $R_f = 0.48$  (petroleum ether/ ethyl acetate = 2:1);

the enantiomeric excess was determined to be 97% by HPLC analysis on Daicel

Chirapak IC column (hexane/isopropanol = 70/30, flow rate 1.0 mL/min, T = 30

°C), UV 254 nm,  $t_R$ (major) 10.527 min,  $t_R$ (minor) 17.661min;  $[\alpha]_D^{25} = -6.56$  (c = 0.43,  $\text{CHCl}_3$ );  $^1\text{H}$  NMR (600 MHz,  $\text{CDCl}_3$ )  $\delta$  7.81 (m, 2H), 7.59 (t,  $J = 6.0$  Hz, 1H), 7.42 (t,  $J = 6.0$  Hz, 1H), 4.22 – 4.10 (m, 2H), 2.16 (m, 2H), 1.99 (s, 2H), 1.34 – 1.19 (m, 11H), 0.86 (t,  $J = 6.8$  Hz, 3H).  $^{13}\text{C}$  NMR (151 MHz,  $\text{CDCl}_3$ )  $\delta$  174.19, 149.55, 137.08, 132.25, 129.05, 128.14, 125.01, 62.65, 61.49, 39.19, 31.56, 29.46, 23.74, 22.50, 13.94, 13.93; HRMS(ESI) m/z:  $[\text{M}+\text{H}]^+$  Calculated for  $\text{C}_{16}\text{H}_{25}\text{N}_2\text{O}_4^+$  309.1809; found 309.1824.

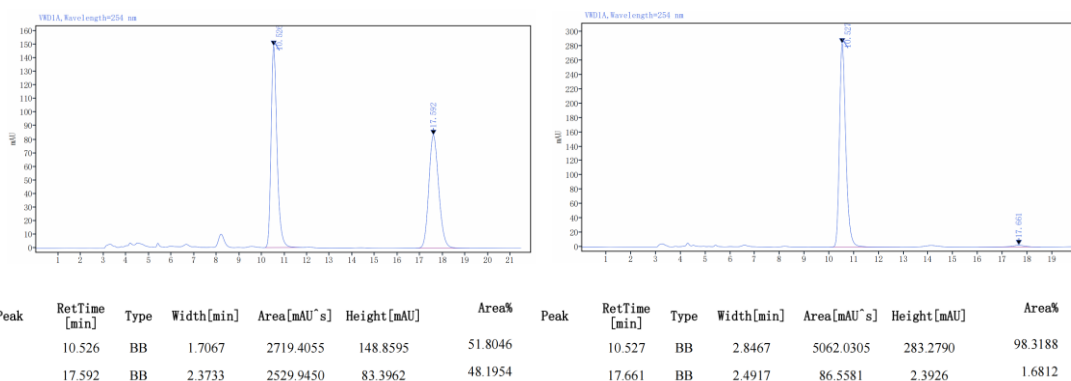

**tert-Butyl (S)-2-amino-4-methyl-2-(2-nitrophenyl)pentanoate (3j):**

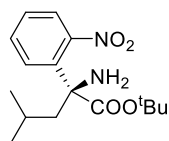

White solid (47.1 mg, 84%); m.p. = 82-84 °C ;  $R_f = 0.41$  (petroleum ether/ ethyl acetate = 2:1); the enantiomeric excess was determined to be >99% by HPLC analysis on Daicel Chirapak IC column (hexane/isopropanol = 70/30, flow rate 1.0 mL/min, T = 30 °C), UV 254 nm,  $t_R$ (major) 7.437 min,  $t_R$ (minor) 18.990 min;  $[\alpha]_D^{25} = -39.58$  (c = 0.32,  $\text{CHCl}_3$ );  $^1\text{H}$  NMR (600 MHz,  $\text{CDCl}_3$ )  $\delta$  7.97 (d,  $J = 6.0$  Hz, 1H), 7.80 (d,  $J = 6.0$  Hz, 1H), 7.56 (t,  $J = 6.0$  Hz, 1H), 7.40 (t,  $J = 6.0$  Hz, 1H), 2.17 (dd,  $J = 18.0, 6.0$  Hz, 1H), 2.04 (dd,  $J = 18.0, 6.0$  Hz, 1H), 1.86 (s, 2H), 1.72 – 1.65 (m, 1H), 1.41 (s, 9H), 0.95 (d,  $J = 6.0$  Hz, 3H), 0.70 (d,  $J = 6.0$  Hz, 3H);  $^{13}\text{C}$  NMR (151 MHz,  $\text{CDCl}_3$ )  $\delta$  173.24, 149.42, 137.82, 131.98, 129.29, 127.90, 124.87, 82.08, 63.50, 46.92, 27.68, 24.81, 24.38, 23.91; HRMS(ESI) m/z:  $[\text{M}+\text{H}]^+$  Calculated for  $\text{C}_{16}\text{H}_{25}\text{N}_2\text{O}_4^+$  309.1809; found 309.1812.

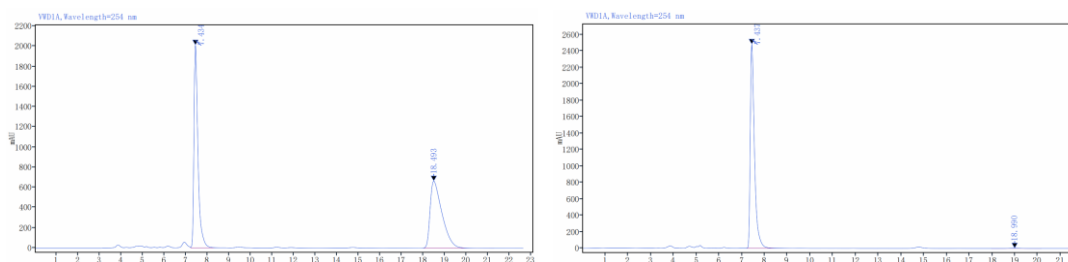



| Peak | RetTime [min] | Type | Width[min] | Area[mAU*s] | Height[mAU] | Area%   | Peak | RetTime [min] | Type | Width[min] | Area[mAU*s] | Height[mAU] | Area%   |
|------|---------------|------|------------|-------------|-------------|---------|------|---------------|------|------------|-------------|-------------|---------|
|      | 7.434         | VB   | 1.3465     | 26026.7568  | 2010.0685   | 50.6475 |      | 7.437         | VB   | 1.9991     | 31987.6405  | 2481.2305   | 99.7228 |
|      | 18.493        | BB   | 3.4567     | 25361.2462  | 664.7665    | 49.3525 |      | 18.990        | BB   | 2.1917     | 88.9280     | 2.5982      | 0.2772  |

### Methyl (*S*)-2-amino-3-cyclohexyl-2-(2-nitrophenyl)propanoate (**3k**):

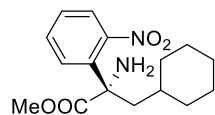

A pale yellow oil (31.1 mg, 51%);  $R_f = 0.42$  (petroleum ether/ ethyl acetate = 2:1); the enantiomeric excess was determined to be 92% by HPLC analysis on Daicel Chirapak IG column (hexane/isopropanol = 70/30, flow rate 1.0 mL/min,  $T = 30\text{ }^\circ\text{C}$ ), UV 254 nm,  $t_R(\text{major})$  9.234 min,  $t_R(\text{minor})$  7.983 min;  $[\alpha]_D^{25} = 8.05$  ( $c = 0.29$ ,  $\text{CHCl}_3$ );  $^1\text{H NMR}$  (600 MHz,  $\text{CDCl}_3$ )  $\delta$  7.91 (d,  $J = 6.0$  Hz, 1H), 7.80 (d,  $J = 6.0$  Hz, 1H), 7.59 (t,  $J = 6.0$  Hz, 1H), 7.48 (t,  $J = 6.0$  Hz, 1H), 3.68 (s, 3H), 2.12 – 2.05 (m, 2H), 1.86 (s, 2H), 1.70 – 1.62 (m, 2H), 1.56 – 1.52 (m, 2H), 1.37 – 1.27 (m, 2H), 1.21 – 0.97 (m, 4H), 0.91 – 0.85 (m, 1H);  $^{13}\text{C NMR}$  (151 MHz,  $\text{CDCl}_3$ )  $\delta$  174.86, 149.43, 137.40, 132.33, 128.93, 128.30, 125.09, 62.67, 52.28, 46.15, 35.22, 35.01, 33.11, 26.37, 26.21, 26.10; **HRMS(ESI)**  $m/z$ :  $[\text{M}+\text{H}]^+$  Calculated for  $\text{C}_{16}\text{H}_{23}\text{N}_2\text{O}_4^+$  307.1652; found 307.1666.

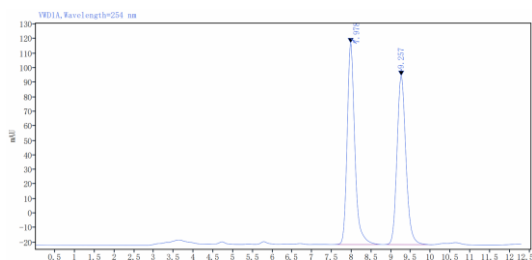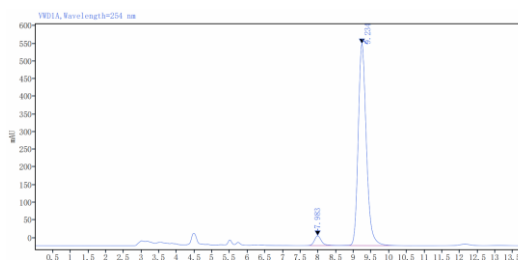

| Peak | RetTime [min] | Type | Width[min] | Area[mAU*s] | Height[mAU] | Area%   | Peak | RetTime [min] | Type | Width[min] | Area[mAU*s] | Height[mAU] | Area%   |
|------|---------------|------|------------|-------------|-------------|---------|------|---------------|------|------------|-------------|-------------|---------|
|      | 7.978         | BB   | 1.3000     | 1886.0549   | 138.5718    | 50.9512 |      | 7.983         | BB   | 0.9417     | 374.4790    | 27.4447     | 3.9482  |
|      | 9.257         | BB   | 1.2400     | 1815.6331   | 116.0901    | 49.0488 |      | 9.234         | BB   | 2.0600     | 9110.2755   | 570.7746    | 96.0518 |

### *tert*-Butyl (*S*)-2-amino-2-(2-nitrophenyl)pent-4-enoate (**3l**):

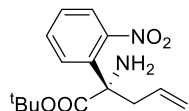

A pale yellow oil (48.4 mg, 83%);  $R_f = 0.42$  (petroleum ether/ ethyl acetate = 2:1); the enantiomeric excess was determined to be >99% by HPLC analysis on Daicel Chirapak IC column (hexane/isopropanol = 70/30, flow rate 1.0 mL/min,  $T = 30\text{ }^\circ\text{C}$ ), UV 254 nm,  $t_R(\text{major})$  6.515 min,  $t_R(\text{minor})$  13.024 min;  $[\alpha]_D^{25} = -78.53$  ( $c = 0.29$ ,  $\text{CHCl}_3$ );  $^1\text{H NMR}$  (600 MHz,  $\text{CDCl}_3$ )  $\delta$  7.81 – 7.78 (m, 2H), 7.56 (t,  $J = 6.0$  Hz, 1H), 7.40 (t,  $J = 6.0$  Hz, 1H), 5.69 – 5.70 (m, 1H), 5.16 – 5.12 (m, 2H), 2.98 – 2.89 (m, 2H), 1.96 (s, 2H), 1.42 (s, 9H);  $^{13}\text{C NMR}$  (151 MHz,  $\text{CDCl}_3$ )  $\delta$  172.54, 149.58, 137.32, 132.27, 132.04, 129.16, 128.05, 124.91, 119.86, 82.48, 62.47, 43.70, 27.71; **HRMS(ESI)**  $m/z$ :  $[\text{M}+\text{H}]^+$  Calculated for  $\text{C}_{15}\text{H}_{21}\text{N}_2\text{O}_4^+$  293.1496; found

293.1510.

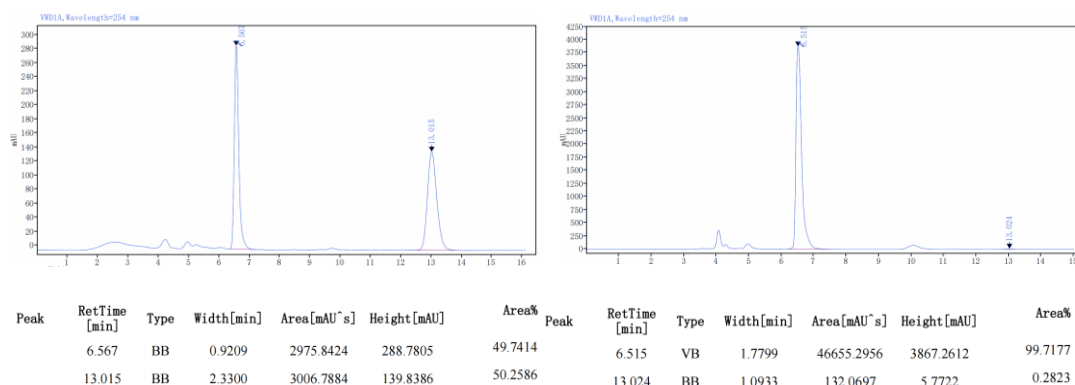

***tert*-Butyl (*S*)-2-amino-2-(2-nitrophenyl)-4-phenylbutanoate (**3m**):**

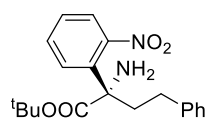

A pale yellow oil (71.4 mg, 89%);  $R_f = 0.46$  (petroleum ether/ ethyl acetate = 2:1); the enantiomeric excess was determined to be >99% by HPLC analysis on Daicel Chirapak IC column (hexane/isopropanol = 70/30, flow rate 1.0 mL/min,  $T = 30\text{ }^\circ\text{C}$ ), UV 254 nm,  $t_R(\text{major})$  7.404 min,  $t_R(\text{minor})$  16.385 min;  $[\alpha]_D^{25} = -36.27$  ( $c = 0.82$ ,  $\text{CHCl}_3$ );  $^1\text{H NMR}$  (600 MHz,  $\text{CDCl}_3$ )  $\delta$  7.88 (d,  $J = 12.0$  Hz, 1H), 7.83 (d,  $J = 12.0$  Hz, 1H), 7.58 (t,  $J = 12.0$  Hz, 1H), 7.42 (t,  $J = 9.0$  Hz, 1H), 7.27 (t,  $J = 6.0$  Hz, 2H), 7.17 (m, 3H), 2.72 – 2.61 (m, 1H), 2.53 – 2.43 (m, 3H), 2.16 (s, 2H), 1.45 (s, 9H).  $^{13}\text{C NMR}$  (151 MHz,  $\text{CDCl}_3$ )  $\delta$  172.86, 149.62, 141.41, 136.96, 132.27, 129.16, 128.52, 128.29, 128.17, 126.07, 125.07, 82.53, 63.09, 40.89, 30.38, 27.74; **HRMS(ESI)**  $m/z$ :  $[\text{M}+\text{H}]^+$  Calculated for  $\text{C}_{20}\text{H}_{25}\text{N}_2\text{O}_4^+$  357.1809; found 357.1822.

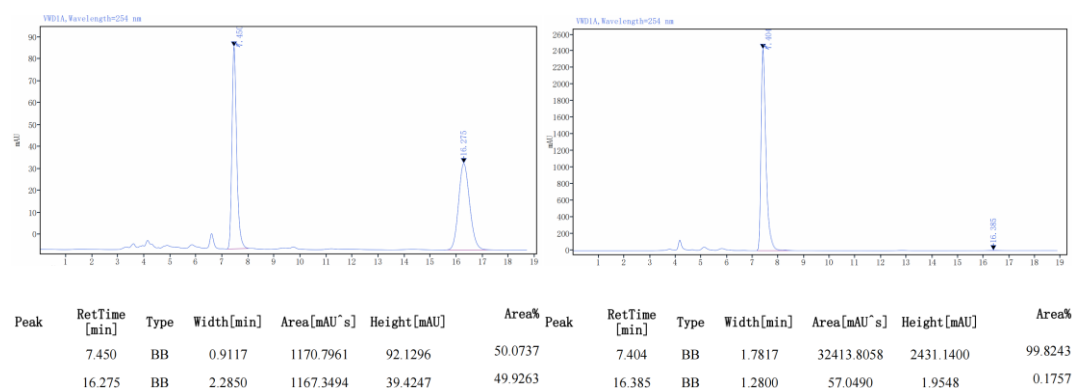

***Di-tert*-butyl (*S*)-2-amino-2-(2-nitrophenyl)pentanedioate (**3n**):**

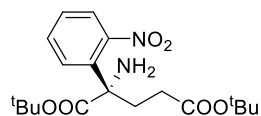

A pale yellow oil (48.4 mg, 64%);  $R_f = 0.47$  (petroleum ether/ ethyl acetate = 2:1); the enantiomeric excess was determined to be 97% by HPLC analysis on Daicel Chirapak IC column (hexane/isopropanol = 70/30, flow rate 1.0 mL/min,  $T = 30\text{ }^\circ\text{C}$ ), UV 254 nm,  $t_R(\text{major})$  10.283 min,  $t_R(\text{minor})$  8.419 min;  $[\alpha]_D^{25} = -75.11$  ( $c = 0.29$ ,  $\text{CHCl}_3$ );  $^1\text{H NMR}$

**NMR (600 MHz, CDCl<sub>3</sub>)**  $\delta$  7.93 (d,  $J$  = 6.0 Hz, 1H), 7.86 (d,  $J$  = 6.0 Hz, 1H), 7.59 (t,  $J$  = 6.0 Hz, 1H), 7.42 (t,  $J$  = 6.0 Hz, 1H), 2.51 (t,  $J$  = 6.0 Hz, 2H), 2.26 – 2.33 (m, 1H), 2.11 – 2.15 (m, 1H), 1.80 (s, 2H), 1.42 (s, 9H), 1.41 (s, 9H); **<sup>13</sup>C NMR (151 MHz, CDCl<sub>3</sub>)**  $\delta$  172.64, 172.46, 149.37, 136.74, 132.42, 129.20, 128.19, 125.16, 82.44, 80.46, 62.68, 33.35, 30.41, 28.06, 27.65; **HRMS(ESI)**  $m/z$ :  $[M+H]^+$  Calculated. for C<sub>19</sub>H<sub>29</sub>N<sub>2</sub>O<sub>6</sub><sup>+</sup> 381.2020; found 381.2031.

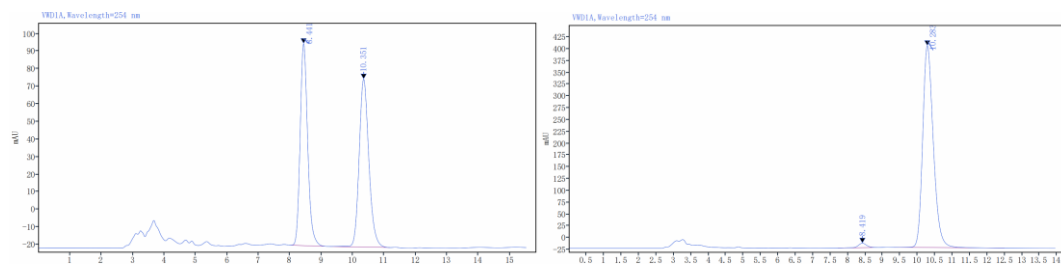

| Peak | RetTime [min] | Type | Width[min] | Area[mAU*s] | Height[mAU] | Area%   | Peak | RetTime [min] | Type | Width[min] | Area[mAU*s] | Height[mAU] | Area%   |
|------|---------------|------|------------|-------------|-------------|---------|------|---------------|------|------------|-------------|-------------|---------|
|      | 8.441         | BB   | 1.1633     | 1906.6976   | 114.8743    | 48.1712 |      | 8.419         | BB   | 1.1417     | 159.3015    | 9.4793      | 1.7274  |
|      | 10.351        | BB   | 1.9100     | 2051.4683   | 95.5246     | 51.8288 |      | 10.283        | BBA  | 3.1733     | 9062.8924   | 427.5883    | 98.2726 |

### Diethyl (*R*)-2-amino-2-(2-nitrophenyl)succinate (**30**):

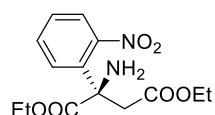

A pale yellow oil (32.2 mg, 52%);  $R_f$  = 0.42 (petroleum ether/ ethyl acetate = 2:1); the enantiomeric excess was determined to be 96% by HPLC analysis on Daicel Chirapak IG column (hexane/isopropanol = 70/30, flow rate 1.0 mL/min,  $T$  = 30 °C), UV 254 nm,  $t_R$ (major) 16.689 min,  $t_R$ (minor) 12.347 min;  $[\alpha]_D^{25}$  = -57.86 ( $c$  = 0.58, CHCl<sub>3</sub>); **<sup>1</sup>H NMR (600 MHz, CDCl<sub>3</sub>)**  $\delta$  7.91 (d,  $J$  = 6.0 Hz, 1H), 7.77 (d,  $J$  = 6.0 Hz, 1H), 7.58 (t,  $J$  = 9.0 Hz, 1H), 7.45 (t,  $J$  = 9.0 Hz, 1H), 4.19 (q,  $J$  = 6.0 Hz, 2H), 4.11 (q,  $J$  = 6.0 Hz, 2H), 3.25 (d,  $J$  = 18.0 Hz, 1H), 3.12 (d,  $J$  = 18.0 Hz, 1H), 2.61 (s, 2H), 1.25 – 1.20 (m, 6H); **<sup>13</sup>C NMR (151 MHz, CDCl<sub>3</sub>)**  $\delta$  172.73, 170.80, 149.24, 136.29, 132.22, 128.80, 128.77, 124.94, 62.20, 61.95, 60.75, 42.76, 14.03, 13.84; **HRMS(ESI)**  $m/z$ :  $[M+H]^+$  Calculated for C<sub>14</sub>H<sub>19</sub>N<sub>2</sub>O<sub>6</sub><sup>+</sup> 311.1238; found 311.1248.

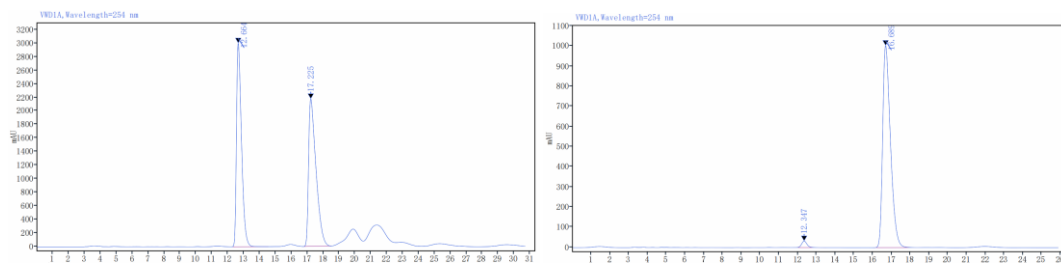

| Peak | RetTime [min] | Type | Width[min] | Area[mAU*s] | Height[mAU] | Area%   | Peak | RetTime [min] | Type | Width[min] | Area[mAU*s] | Height[mAU] | Area%   |
|------|---------------|------|------------|-------------|-------------|---------|------|---------------|------|------------|-------------|-------------|---------|
|      | 12.664        | BB   | 2.3317     | 65794.4445  | 2997.1415   | 48.3356 |      | 12.347        | BB   | 1.8233     | 640.0913    | 32.3327     | 2.1559  |
|      | 17.225        | BB   | 1.7646     | 70325.7028  | 2172.0285   | 51.6644 |      | 16.689        | BB   | 2.3383     | 29050.3166  | 1003.7082   | 97.8441 |

**Ethyl (2S, 5R)-2-amino-4-(methylsulfinyl)-2-(2-nitrophenyl)butanoate (3p):**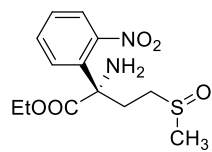

A pale yellow oil (42.3 mg, 67%);  $R_f = 0.46$  (petroleum ether/ ethyl acetate = 2:1); the enantiomeric excess was determined to be 94% by HPLC analysis on Daicel Chirapak IC column (hexane/isopropanol = 70/30, flow rate 1.0 mL/min,  $T = 30\text{ }^\circ\text{C}$ ), UV 254 nm,  $t_R(\text{major})$  16.443 min,  $t_R(\text{minor})$  22.888 min;  $[\alpha]_D^{25} = -54.76$  ( $c = 0.45$ ,  $\text{CHCl}_3$ );  $^1\text{H NMR}$  (600 MHz,  $\text{CDCl}_3$ )  $\delta$  7.92 (d,  $J = 6.0$  Hz, 1H), 7.87 (d,  $J = 6.0$  Hz, 1H), 7.62 (t,  $J = 6.0$  Hz, 1H), 7.46 (t,  $J = 9.0$  Hz, 1H), 4.17 (q,  $J = 6.0$  Hz, 2H), 2.55 – 2.48 (m, 3H), 2.30 – 2.26 (m, 1H), 2.08 (s, 3H), 1.61 (s, 2H), 1.22 (t,  $J = 7.1$  Hz, 3H);  $^{13}\text{C NMR}$  (151 MHz,  $\text{CDCl}_3$ )  $\delta$  173.59, 149.21, 136.29, 132.59, 128.99, 128.51, 125.28, 62.59, 61.71, 38.49, 28.68, 15.55, 13.92; **HRMS(ESI)**  $m/z$ :  $[\text{M}+\text{Na}]^+$  Calculated for  $\text{C}_{13}\text{H}_{19}\text{N}_2\text{O}_5\text{SNa}^+$  315.1009; found 315.1010.

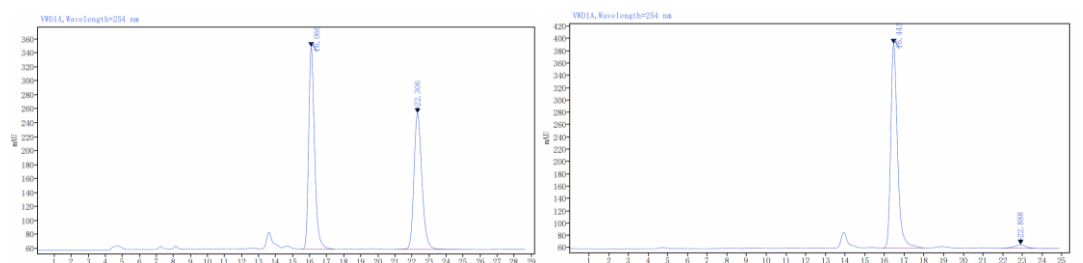

| Peak | RetTime [min] | Type | Width[min] | Area[mAU*s] | Height[mAU] | Area%   | Peak | RetTime [min] | Type | Width[min] | Area[mAU*s] | Height[mAU] | Area%   |
|------|---------------|------|------------|-------------|-------------|---------|------|---------------|------|------------|-------------|-------------|---------|
|      | 16.066        | BB   | 2.2100     | 6927.4854   | 288.8164    | 52.1471 |      | 16.443        | BB   | 2.3667     | 7918.7158   | 331.3081    | 97.0451 |
|      | 22.306        | BB   | 5.4033     | 6357.0148   | 194.6055    | 47.8529 |      | 22.888        | BB   | 2.5867     | 241.1116    | 5.4840      | 2.9549  |

**tert-Butyl (S)-2-amino-3-(tert-butoxy)-2-(2-nitrophenyl)propanoate (3q):**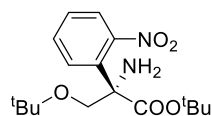

A pale yellow oil (33.4 mg, 49%);  $R_f = 0.48$  (petroleum ether/ ethyl acetate = 2:1); the enantiomeric excess was determined to be 96% by HPLC analysis on Daicel Chirapak IC column (hexane/isopropanol = 70/30, flow rate 1.0 mL/min,  $T = 30\text{ }^\circ\text{C}$ ), UV 254 nm,  $t_R(\text{major})$  8.820 min,  $t_R(\text{minor})$  27.267 min;  $[\alpha]_D^{25} = -58.86$  ( $c = 0.25$ ,  $\text{CHCl}_3$ );  $^1\text{H NMR}$  (600 MHz,  $\text{CDCl}_3$ )  $\delta$  7.67 – 7.69 (m, 2H), 7.51 (t,  $J = 6.0$  Hz, 1H), 7.38 (t,  $J = 6.0$  Hz, 1H), 3.92 (d,  $J = 6.0$  Hz, 1H), 3.83 (d,  $J = 6.0$  Hz, 1H), 2.01 (s, 2H), 1.44 (s, 9H), 1.18 (s, 9H);  $^{13}\text{C NMR}$  (151 MHz,  $\text{CDCl}_3$ )  $\delta$  171.79, 150.11, 135.95, 131.55, 129.47, 128.06, 124.69, 82.39, 73.66, 67.09, 63.85, 27.81, 27.45; **HRMS(ESI)**  $m/z$ :  $[\text{M}+\text{H}]^+$  Calculated for  $\text{C}_{17}\text{H}_{27}\text{N}_2\text{O}_5^+$  339.1914; found 339.1914.

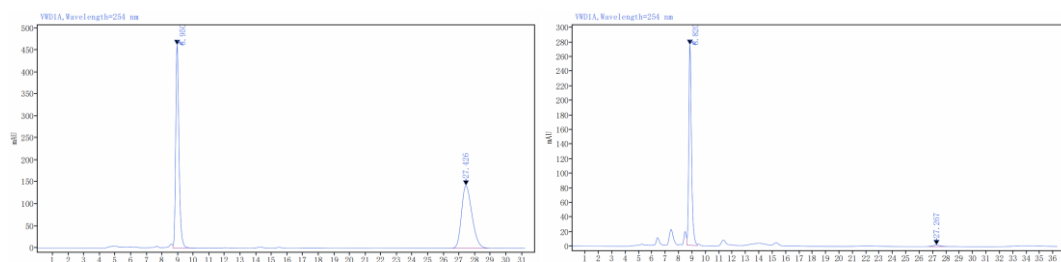

| Peak | RetTime [min] | Type | Width [min] | Area [mAU*s] | Height [mAU] | Area%   | Peak | RetTime [min] | Type | Width [min] | Area [mAU*s] | Height [mAU] | Area%   |
|------|---------------|------|-------------|--------------|--------------|---------|------|---------------|------|-------------|--------------|--------------|---------|
|      | 8.950         | VB   | 1.4172      | 6716.3997    | 461.1876     | 50.4290 |      | 8.820         | VV   | 0.7906      | 3815.9814    | 274.9332     | 98.0152 |
|      | 27.426        | BB   | 3.4150      | 6602.1297    | 142.2216     | 49.5710 |      | 27.267        | BB   | 1.8517      | 77.2739      | 1.7902       | 1.9848  |

### Ethyl (*S*)-2-amino-3-(1*H*-indol-2-yl)-2-(2-nitrophenyl)propanoate (**3r**):

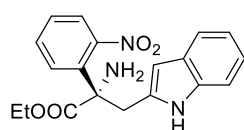

A pale yellow oil (28.9 mg, 41%); m.p. = 95-97 °C,  $R_f$  = 0.49 (petroleum ether/ ethyl acetate = 2:1); the enantiomeric excess was determined to be 95% by HPLC analysis on Daicel Chirapak IC column (hexane/isopropanol = 70/30, flow rate 1.0 mL/min,  $T$  = 30 °C), UV 254 nm,  $t_R$ (major) 14.276 min,  $t_R$ (minor) 15.798 min;  $[\alpha]_D^{25}$  = -24.15 ( $c$  = 0.43,  $\text{CHCl}_3$ );  $^1\text{H NMR}$  (600 MHz,  $\text{CDCl}_3$ )  $\delta$  8.04 (s, 1H), 7.70 (d,  $J$  = 6.0 Hz, 1H), 7.64 (d,  $J$  = 6.0 Hz, 1H), 7.36 – 7.28 (m, 3H), 7.22 (d,  $J$  = 6.0 Hz, 1H), 7.06 (t,  $J$  = 9.0 Hz, 1H), 6.95 (t,  $J$  = 6.0 Hz, 1H), 6.83 (s, 1H), 4.04 – 3.97 (m, 2H), 3.65 (dd,  $J$  = 24.0, 12.0 Hz, 2H), 1.94 (s, 2H), 1.05 (t,  $J$  = 6.0 Hz, 3H);  $^{13}\text{C NMR}$  (151 MHz,  $\text{CDCl}_3$ )  $\delta$  173.78, 149.54, 137.46, 135.85, 131.90, 129.32, 128.52, 128.20, 124.75, 124.09, 122.02, 119.62, 118.90, 110.98, 109.61, 63.72, 61.63, 34.77, 13.79; **HRMS(ESI)**  $m/z$ :  $[\text{M}+\text{H}]^+$  Calculated for  $\text{C}_{19}\text{H}_{20}\text{N}_3\text{O}_4$  +354.1448; found 354.1469.

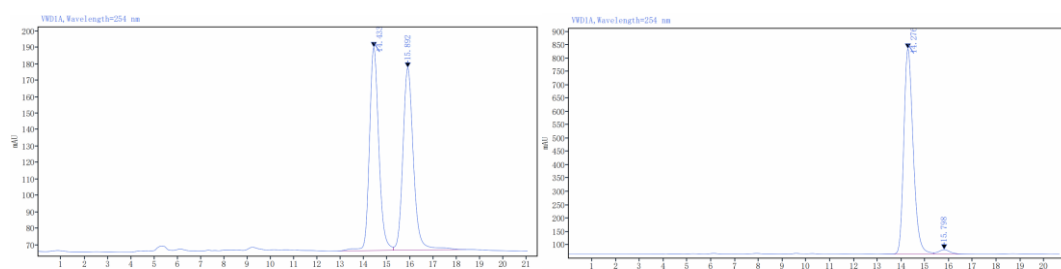

| Peak | RetTime [min] | Type | Width [min] | Area [mAU*s] | Height [mAU] | Area%   | Peak | RetTime [min] | Type | Width [min] | Area [mAU*s] | Height [mAU] | Area%   |
|------|---------------|------|-------------|--------------|--------------|---------|------|---------------|------|-------------|--------------|--------------|---------|
|      | 14.433        | BV   | 2.3929      | 3447.2162    | 123.4065     | 49.7154 |      | 14.276        | BV   | 2.3343      | 21051.8048   | 768.8665     | 97.5397 |
|      | 15.892        | VB   | 3.1254      | 3486.6907    | 110.7714     | 50.2846 |      | 15.798        | VB   | 1.7107      | 531.0118     | 16.0761      | 2.4603  |

### *tert*-Butyl (*S*)-2-amino-2-(4-fluoro-2-nitrophenyl)propanoate (**3s**):

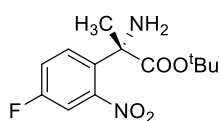

A pale yellow oil (52.1 mg, 91%);  $R_f$  = 0.36 (petroleum ether/ ethyl acetate = 2:1); the enantiomeric excess was determined to be >99% by HPLC analysis on Daicel Chirapak IC column (hexane/isopropanol = 70/30, flow rate 1.0

mL/min, T = 30 °C), UV 254 nm,  $t_R(\text{major})$  8.586 min;  $[\alpha]_D^{25} = -77.35$  (c = 0.75, CHCl<sub>3</sub>); <sup>1</sup>H NMR (600 MHz, CDCl<sub>3</sub>) δ 7.94 (dd, J = 12.0, 6.0 Hz, 1H), 7.59 (dd, J = 8.3, 2.8 Hz, 1H), 7.34 – 7.26 (m, 1H), 2.06 (s, 2H), 1.75 (s, 3H), 1.41 (s, 9H); <sup>13</sup>C NMR (151 MHz, CDCl<sub>3</sub>) δ 173.44, 161.81, 160.15, 149.24, 134.88, 130.42, 130.37, 119.75, 119.61, 112.59, 112.41, 82.34, 60.03, 27.86, 27.56; HRMS(ESI) m/z: [M+H]<sup>+</sup> Calculated for C<sub>13</sub>H<sub>18</sub>FN<sub>2</sub>O<sub>4</sub><sup>+</sup> 285.1245; found 285.1259.

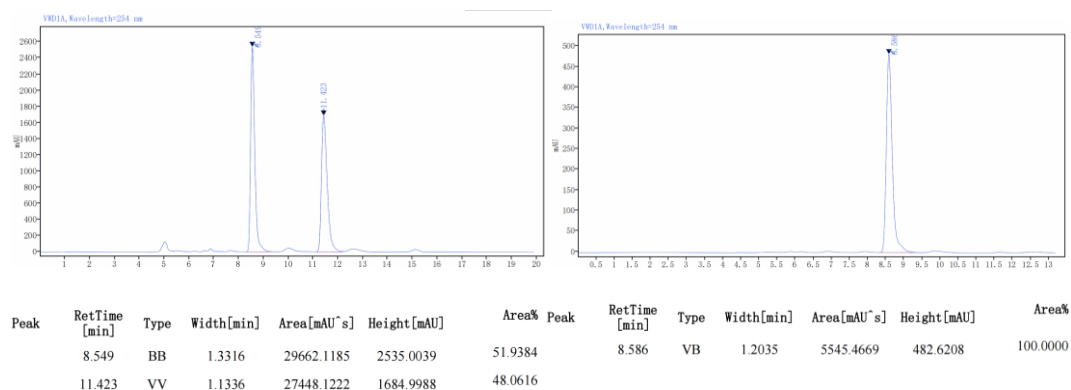

#### *tert*-Butyl (*S*)-2-amino-2-(4-bromo-2-nitrophenyl)propanoate (**3t**):

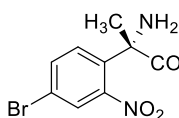

A pale yellow oil (48.7 mg, 71%);  $R_f = 0.38$  (petroleum ether/ ethyl acetate = 2:1); the enantiomeric excess was determined to be 94% by HPLC analysis on Daicel Chirapak IG column (hexane/isopropanol = 70/30, flow rate 1.0 mL/min, T = 30 °C), UV 254 nm,  $t_R(\text{major})$  10.941 min,  $t_R(\text{minor})$  8.513 min;  $[\alpha]_D^{25} = -81.92$  (c = 0.78, CHCl<sub>3</sub>); <sup>1</sup>H NMR (600 MHz, CDCl<sub>3</sub>) δ 7.98 (s, 1H), 7.82 (d, J = 12.0 Hz, 1H), 7.70 (d, J = 12.0 Hz, 1H), 1.98 (s, 2H), 1.74 (s, 3H), 1.41 (s, 9H); <sup>13</sup>C NMR (151 MHz, CDCl<sub>3</sub>) δ 173.23, 149.29, 138.13, 135.66, 130.15, 127.75, 121.11, 82.42, 60.16, 27.76, 27.58; HRMS(ESI) m/z: [M+H]<sup>+</sup> Calculated for C<sub>13</sub>H<sub>18</sub>BrN<sub>2</sub>O<sub>4</sub><sup>+</sup> 345.0444; found 345.0458.

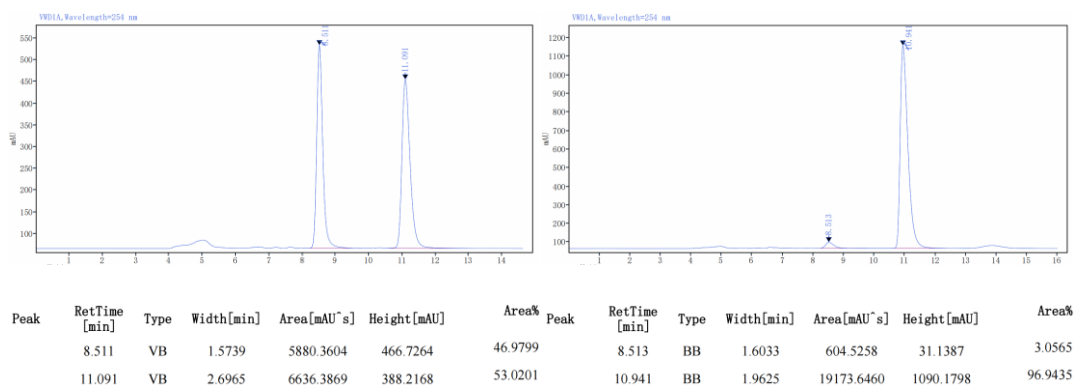

***tert*-Butyl (*S*)-2-amino-2-(4-iodo-2-nitrophenyl)propanoate (**3u**):**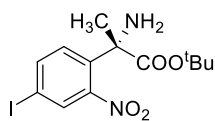

A pale yellow oil (43.3 mg, 55%);  $R_f = 0.38$  (petroleum ether/ ethyl acetate = 2:1); the enantiomeric excess was determined to be 91% by HPLC analysis on Daicel Chirapak ID column (hexane/isopropanol = 70/30, flow rate 1.0 mL/min,  $T = 30\text{ }^\circ\text{C}$ ), UV 254 nm,  $t_R(\text{major})$  9.297 min,  $t_R(\text{minor})$  8.154 min;  $[\alpha]_D^{25} = -51.67$  ( $c = 0.33$ ,  $\text{CHCl}_3$ );  $^1\text{H NMR}$  (600 MHz,  $\text{CDCl}_3$ )  $\delta$  8.14 (s, 1H), 7.89 (d,  $J = 6.0$  Hz, 1H), 7.66 (d,  $J = 6.0$  Hz, 1H), 2.02 (s, 2H), 1.73 (s, 3H), 1.40 (s, 9H);  $^{13}\text{C NMR}$  (151 MHz,  $\text{CDCl}_3$ )  $\delta$  173.22, 149.18, 141.67, 138.77, 133.35, 130.25, 91.62, 82.44, 60.20, 27.71, 27.59; **HRMS(ESI)**  $m/z$ :  $[\text{M}+\text{Na}]^+$  Calculated for  $\text{C}_{13}\text{H}_{17}\text{IN}_2\text{NaO}_4^+$  415.0125; found 415.0123.

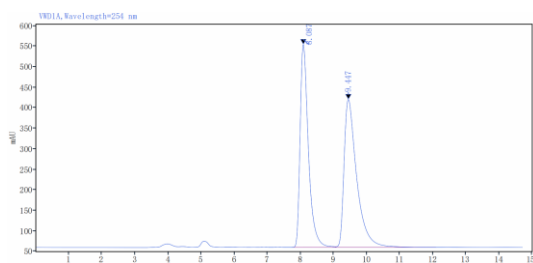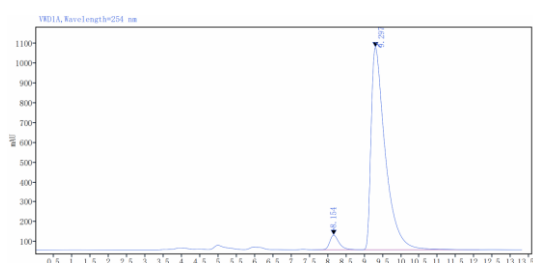

| Peak | RetTime [min] | Type | Width[min] | Area[mAU*s] | Height[mAU] | Area%   | Peak | RetTime [min] | Type | Width[min] | Area[mAU*s] | Height[mAU] | Area%   |
|------|---------------|------|------------|-------------|-------------|---------|------|---------------|------|------------|-------------|-------------|---------|
|      | 8.087         | BV   | 1.3217     | 8594.9445   | 494.5145    | 47.3661 |      | 8.154         | BV   | 1.3488     | 1300.7925   | 73.4194     | 4.5140  |
|      | 9.447         | VB   | 3.0333     | 9550.8279   | 360.5925    | 52.6339 |      | 9.297         | VB   | 3.2229     | 27516.1343  | 1018.8825   | 95.4860 |

***tert*-Butyl (*S*)-2-amino-2-(4-methyl-2-nitrophenyl)propanoate (**3v**):**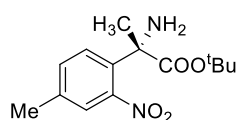

A pale yellow oil (38.6 mg, 69%);  $R_f = 0.26$  (petroleum ether/ ethyl acetate = 2:1); the enantiomeric excess was determined to be 97% by HPLC analysis on Daicel Chirapak IC column (hexane/isopropanol = 70/30, flow rate 1.0 mL/min,  $T = 30\text{ }^\circ\text{C}$ ), UV 254 nm,  $t_R(\text{major})$  8.375 min,  $t_R(\text{minor})$  13.806 min;  $[\alpha]_D^{25} = -27.6$  ( $c = 0.51$ ,  $\text{CHCl}_3$ );  $^1\text{H NMR}$  (600 MHz,  $\text{CDCl}_3$ )  $\delta$  7.75 (d,  $J = 6.0$  Hz, 1H), 7.68 (s, 1H), 7.39 (d,  $J = 12.0$  Hz, 1H), 2.41 (s, 3H), 1.97 (s, 2H), 1.74 (s, 3H), 1.40 (s, 9H);  $^{13}\text{C NMR}$  (151 MHz,  $\text{CDCl}_3$ )  $\delta$  174.03, 148.62, 138.44, 135.86, 133.52, 128.29, 125.35, 81.99, 60.04, 27.86, 27.59, 20.53; **HRMS(ESI)**  $m/z$ :  $[\text{M}+\text{H}]^+$  Calculated for  $\text{C}_{14}\text{H}_{21}\text{N}_2\text{O}_4^+$  281.1496; found 281.1495.

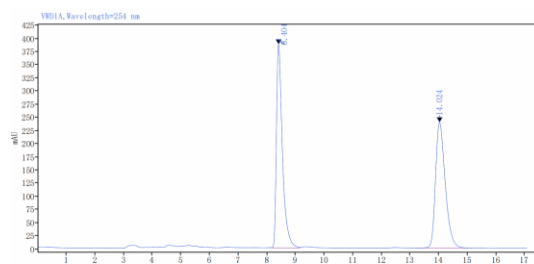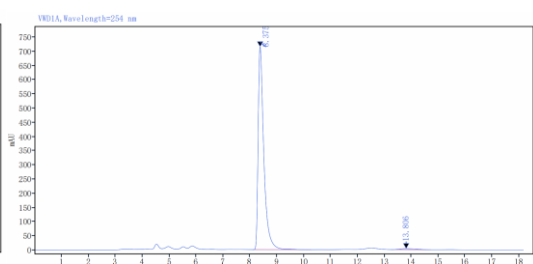

| Peak | RetTime [min] | Type | Width[min] | Area[mAU*s] | Height[mAU] | Area%   | Peak | RetTime [min] | Type | Width[min] | Area[mAU*s] | Height[mAU] | Area%   |
|------|---------------|------|------------|-------------|-------------|---------|------|---------------|------|------------|-------------|-------------|---------|
|      | 8.404         | BV   | 1.2208     | 5592.0718   | 386.0433    | 49.9962 |      | 8.375         | BB   | 2.1733     | 10494.6017  | 713.3597    | 98.5177 |
|      | 14.024        | BB   | 1.9467     | 5592.9119   | 238.2571    | 50.0038 |      | 13.806        | BB   | 1.4833     | 157.9042    | 3.6360      | 1.4823  |

***tert*-Butyl (*S*)-2-amino-2-(4-methoxy-2-nitrophenyl)propanoate (**3w**):**

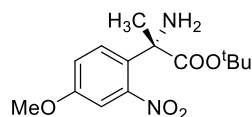

A pale yellow oil (45.6 mg, 77%);  $R_f = 0.27$  (petroleum ether/ ethyl acetate = 2:1); the enantiomeric excess was determined to be >99% by HPLC analysis on Daicel Chirapak IC column (hexane/isopropanol = 70/30, flow rate 1.0 mL/min,  $T = 30\text{ }^\circ\text{C}$ ), UV 254 nm,  $t_{R(\text{major})} 16.487$  min;  $[\alpha]_D^{25} = -30.6$  ( $c = 0.25$ ,  $\text{CHCl}_3$ );  $^1\text{H NMR}$  (600 MHz,  $\text{CDCl}_3$ )  $\delta$  7.77 (d,  $J = 12.0$  Hz, 1H), 7.38 (s, 1H), 7.10 (d,  $J = 6.0$  Hz, 1H), 3.86 (s, 3H), 2.19 (s, 2H), 1.74 (s, 3H), 1.40 (s, 9H);  $^{13}\text{C NMR}$  (151 MHz,  $\text{CDCl}_3$ )  $\delta$  174.09, 158.80, 149.32, 130.63, 129.51, 118.70, 110.10, 82.00, 59.87, 55.79, 27.90, 27.60; **HRMS(ESI)**  $m/z$ :  $[\text{M}+\text{H}]^+$  Calculated for  $\text{C}_{14}\text{H}_{21}\text{N}_2\text{O}_5^+$  297.1445; found 297.1447.

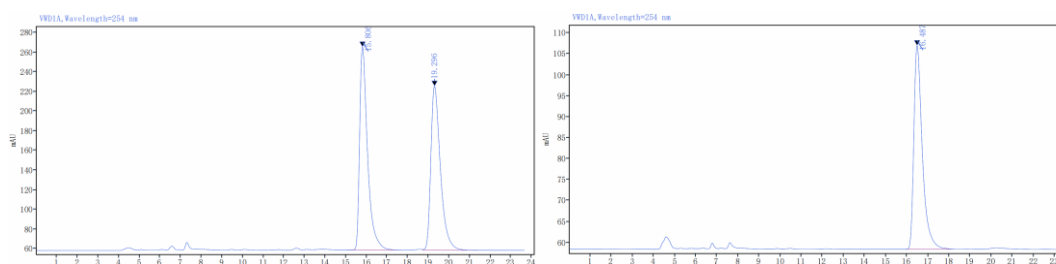

| Peak | RetTime [min] | Type | Width[min] | Area[mAU*s] | Height[mAU] | Area%   | Peak | RetTime [min] | Type | Width[min] | Area[mAU*s] | Height[mAU] | Area%    |
|------|---------------|------|------------|-------------|-------------|---------|------|---------------|------|------------|-------------|-------------|----------|
|      | 15.806        | BB   | 2.7200     | 5504.6620   | 206.6404    | 50.6407 |      | 16.487        | BB   | 2.4750     | 1356.0870   | 48.5729     | 100.0000 |
|      | 19.296        | VB   | 2.6575     | 5365.3823   | 166.8838    | 49.3593 |      |               |      |            |             |             |          |

***tert*-Butyl (*S*)-2-amino-2-(3-nitro-[1,1'-biphenyl]-4-yl)propanoate (**3x**):**

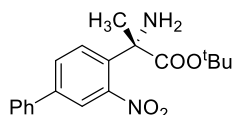

A pale yellow oil (47.2 mg, 69%);  $R_f = 0.38$  (petroleum ether/ ethyl acetate = 2:1); the enantiomeric excess was determined to be 99% by HPLC analysis on Daicel Chirapak IG column (hexane/isopropanol = 70/30, flow rate 1.0 mL/min,  $T = 30\text{ }^\circ\text{C}$ ), UV 254 nm,  $t_{R(\text{major})} 10.551$  min,  $t_{R(\text{minor})} 8.497$  min;  $[\alpha]_D^{25} = -31.17$  ( $c = 0.80$ ,  $\text{CHCl}_3$ );  $^1\text{H NMR}$  (600 MHz,  $\text{CDCl}_3$ )  $\delta$  8.09 (s, 1H), 7.96 (d,  $J = 12.0$  Hz, 1H), 7.81 (d,  $J = 6.0$  Hz, 1H), 7.61 (d,  $J = 6.0$  Hz, 2H), 7.49 – 7.40 (m, 3H), 2.04 (s, 2H), 1.80 (s, 3H), 1.43 (s, 9H);  $^{13}\text{C NMR}$  (151 MHz,  $\text{CDCl}_3$ )  $\delta$  173.85, 149.20, 141.38, 138.22, 137.49, 130.97, 129.10, 129.01, 128.45, 126.99, 123.35, 82.19, 60.20, 27.90, 27.64; **HRMS(ESI)**  $m/z$ :  $[\text{M}+\text{H}]^+$  Calculated for  $\text{C}_{19}\text{H}_{23}\text{N}_2\text{O}_4^+$  343.1652; found 343.1652.



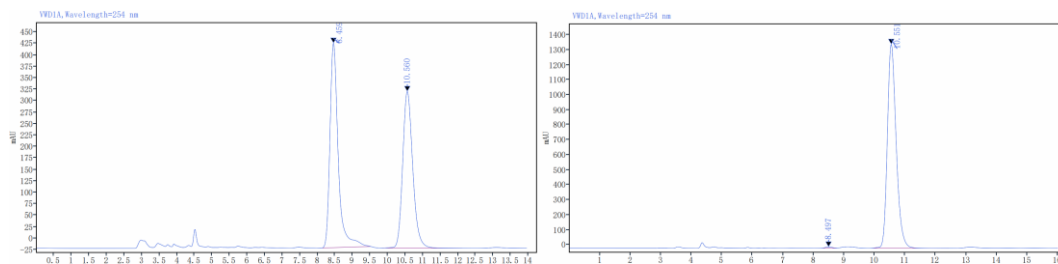

| Peak | RetTime [min] | Type | Width[min] | Area[mAU*s] | Height[mAU] | Area%   | Peak | RetTime [min] | Type | Width[min] | Area[mAU*s] | Height[mAU] | Area%   |
|------|---------------|------|------------|-------------|-------------|---------|------|---------------|------|------------|-------------|-------------|---------|
|      | 8.459         | BM m | 0.2457     | 7292.7703   | 446.1755    | 51.7795 |      | 8.497         | BV   | 0.7141     | 119.8623    | 7.8416      | 0.4395  |
|      | 10.560        | BB   | 2.2800     | 6791.5159   | 341.8489    | 48.2205 |      | 10.551        | VB   | 2.6373     | 27153.4995  | 1358.0694   | 99.5605 |

***tert*-Butyl (*S*)-2-amino-2-(4'-fluoro-3-nitro-[1,1'-biphenyl]-4-yl)propanoate (**3y**):**

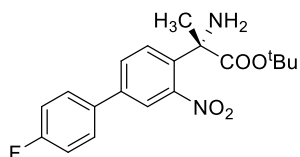

A pale yellow oil (42.8 mg, 60%);  $R_f = 0.38$  (petroleum ether/ ethyl acetate = 2:1); the enantiomeric excess was determined to be 98% by HPLC analysis on Daicel Chirapak IC column (hexane/isopropanol =

70/30, flow rate 1.0 mL/min,  $T = 30\text{ }^\circ\text{C}$ ), UV 254 nm,  $t_R(\text{major})$  8.648 min,  $t_R(\text{minor})$  12.074 min;  $[\alpha]_D^{25} = -40.20$  ( $c = 0.60$ ,  $\text{CHCl}_3$ );  $^1\text{H NMR}$  (600 MHz,  $\text{CDCl}_3$ )  $\delta$  8.03 (s, 1H), 7.96 (d,  $J = 6.0$  Hz, 1H), 7.75 (d,  $J = 6.0$  Hz, 1H), 7.59 – 7.56 (m, 2H), 7.17 (t,  $J = 9.0$  Hz, 2H), 2.08 (s, 2H), 1.80 (s, 3H), 1.43 (s, 9H);  $^{13}\text{C NMR}$  (151 MHz,  $\text{CDCl}_3$ )  $\delta$  173.69, 163.93, 162.29, 149.20, 140.40, 137.36, 134.32, 130.84, 129.17, 128.74, 128.69, 123.18, 116.17, 116.02, 82.31, 60.18, 27.80, 27.62;

**HRMS(ESI)  $m/z$ :**  $[\text{M}+\text{H}]^+$  Calculated for  $\text{C}_{19}\text{H}_{22}\text{FN}_2\text{O}_4^+$  361.1558; found 361.1557.

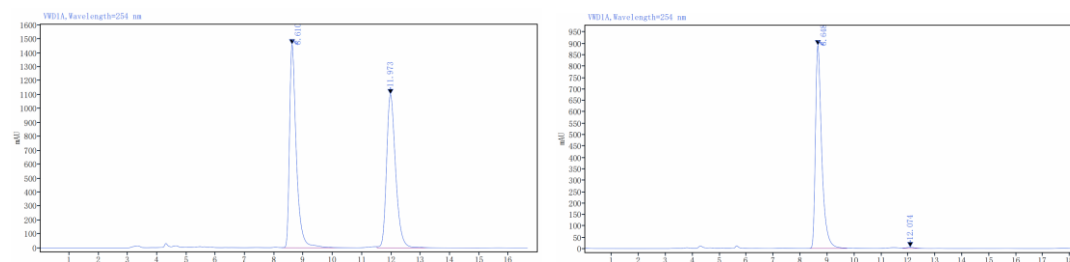

| Peak | RetTime [min] | Type | Width[min] | Area[mAU*s] | Height[mAU] | Area%   | Peak | RetTime [min] | Type | Width[min] | Area[mAU*s] | Height[mAU] | Area%   |
|------|---------------|------|------------|-------------|-------------|---------|------|---------------|------|------------|-------------|-------------|---------|
|      | 8.610         | VB   | 2.5372     | 23551.4873  | 1457.5365   | 49.9339 |      | 8.648         | BV   | 1.4972     | 14472.4951  | 889.4304    | 99.1824 |
|      | 11.973        | VB   | 3.4971     | 23613.8432  | 1100.3359   | 50.0661 |      | 12.074        | VB   | 1.0740     | 119.3003    | 4.9362      | 0.8176  |

***tert*-Butyl (*S*)-2-amino-2-(5-methyl-2-nitrophenyl)propanoate (**3z**):**

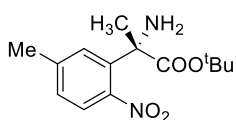

A pale yellow oil (38.6 mg, 69%);  $R_f = 0.26$  (petroleum ether/ ethyl acetate = 2:1); the enantiomeric excess was determined to be >99% by HPLC analysis on Daicel Chirapak IC column (hexane/isopropanol = 70/30, flow rate 1.0

mL/min,  $T = 30\text{ }^\circ\text{C}$ ), UV 254 nm,  $t_R(\text{major})$  8.396 min;  $[\alpha]_D^{25} = -11.95$  ( $c = 0.66$ ,  $\text{CHCl}_3$ );  $^1\text{H NMR}$  (600 MHz,  $\text{CDCl}_3$ )  $\delta$  7.82 (d,  $J = 6.0$  Hz, 1H), 7.70 (s, 1H), 7.20 (d,  $J = 12.0$  Hz, 1H), 2.45 (s, 3H),

2.06 (s, 2H), 1.75 (s, 3H), 1.40 (s, 9H);  $^{13}\text{C}$  NMR (151 MHz,  $\text{CDCl}_3$ )  $\delta$  173.97, 146.50, 144.09, 138.75, 128.95, 128.46, 125.28, 81.99, 60.26, 27.61, 27.59, 21.64; HRMS(ESI)  $m/z$ :  $[\text{M}+\text{H}]^+$  Calculated for  $\text{C}_{14}\text{H}_{21}\text{N}_2\text{O}_4^+$  281.1496; found 281.1496.

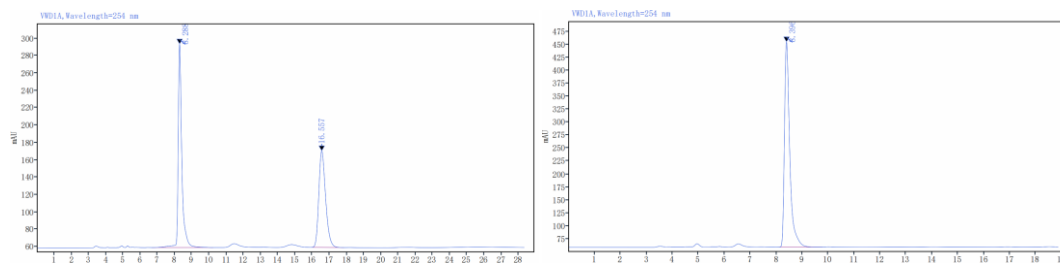

| Peak | RetTime [min] | Type | Width [min] | Area [mAU*s] | Height [mAU] | Area%   | Peak | RetTime [min] | Type | Width [min] | Area [mAU*s] | Height [mAU] | Area%    |
|------|---------------|------|-------------|--------------|--------------|---------|------|---------------|------|-------------|--------------|--------------|----------|
|      | 8.288         | BB   | 3.5683      | 3449.4843    | 234.2910     | 53.0214 |      | 8.396         | BB   | 1.6767      | 5615.2964    | 395.2744     | 100.0000 |
|      | 16.557        | BB   | 1.9233      | 3056.3538    | 111.1442     | 46.9786 |      |               |      |             |              |              |          |

### *tert*-Butyl (*S*)-2-amino-2-(5-methoxy-2-nitrophenyl)propanoate (3aa):

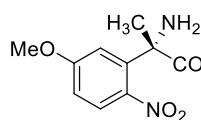

A pale yellow oil (34.9 mg, 59%);  $R_f = 0.27$  (petroleum ether/ ethyl acetate = 2:1); the enantiomeric excess was determined to be >99% by HPLC analysis on Daicel Chirapak IC column (hexane/isopropanol = 70/30, flow rate 1.0 mL/min,  $T = 30\text{ }^\circ\text{C}$ ), UV 254 nm,  $t_R(\text{major})$  10.975 min;  $[\alpha]_D^{25} = -31.47$  ( $c = 0.62$ ,  $\text{CHCl}_3$ );  $^1\text{H}$  NMR (600 MHz,  $\text{CDCl}_3$ )  $\delta$  8.03 (d,  $J = 12.0$  Hz, 1H), 7.48 (s, 1H), 6.85 (d,  $J = 12.0$  Hz, 1H), 3.91 (s, 3H), 2.09 (s, 2H), 1.74 (s, 3H), 1.40 (s, 9H);  $^{13}\text{C}$  NMR (151 MHz,  $\text{CDCl}_3$ )  $\delta$  173.70, 163.35, 142.04, 141.61, 127.97, 114.38, 111.85, 81.87, 60.53, 55.79, 27.60, 27.21; HRMS(ESI)  $m/z$ :  $[\text{M}+\text{H}]^+$  Calculated for  $\text{C}_{14}\text{H}_{21}\text{N}_2\text{O}_5^+$  297.1445; found 297.1445.

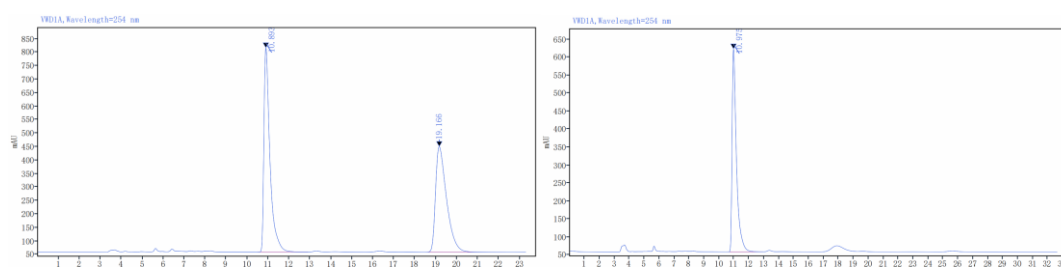

| Peak | RetTime [min] | Type | Width [min] | Area [mAU*s] | Height [mAU] | Area%   | Peak | RetTime [min] | Type | Width [min] | Area [mAU*s] | Height [mAU] | Area%    |
|------|---------------|------|-------------|--------------|--------------|---------|------|---------------|------|-------------|--------------|--------------|----------|
|      | 10.893        | BB   | 2.4083      | 15202.9004   | 756.8794     | 51.7809 |      | 10.975        | BB   | 2.4261      | 11434.1551   | 563.4794     | 100.0000 |
|      | 19.166        | BB   | 3.8133      | 14157.1406   | 390.9754     | 48.2191 |      |               |      |             |              |              |          |

### *tert*-Butyl (*S*)-2-amino-2-(2-fluoro-6-nitrophenyl)propanoate (3ab):

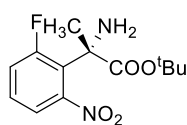

A pale yellow oil (36.9 mg, 65%);  $R_f = 0.62$  (petroleum ether/ ethyl acetate = 2:1); the enantiomeric excess was determined to be 96% by HPLC analysis on Daicel Chirapak IG column (hexane/isopropanol = 70/30, flow rate 1.0 mL/min,

T = 30 °C), UV 254 nm,  $t_R$ (major) 8.250 min,  $t_R$ (minor) 6.601 min;  $[\alpha]_D^{25} = 85.05$  (c = 0.66, CHCl<sub>3</sub>); <sup>1</sup>H NMR (600 MHz, CDCl<sub>3</sub>) δ 7.35 (m, 1H), 7.30 – 7.25 (m, 1H), 7.23 – 7.17 (m, 1H), 1.86 (s, 2H), 1.76 (d, J = 6.0 Hz, 3H), 1.44 (s, 9H); <sup>13</sup>C NMR (151 MHz, CDCl<sub>3</sub>) δ 173.00, 161.16, 159.50, 151.06, 128.90, 128.84, 126.14, 126.03, 119.76, 119.74, 118.75, 118.59, 82.09, 59.74, 27.59, 26.03, 25.99; HRMS(ESI) m/z: [M+H]<sup>+</sup> Calculated for C<sub>13</sub>H<sub>18</sub>FN<sub>2</sub>O<sub>4</sub><sup>+</sup> 285.1245; found 285.1247.

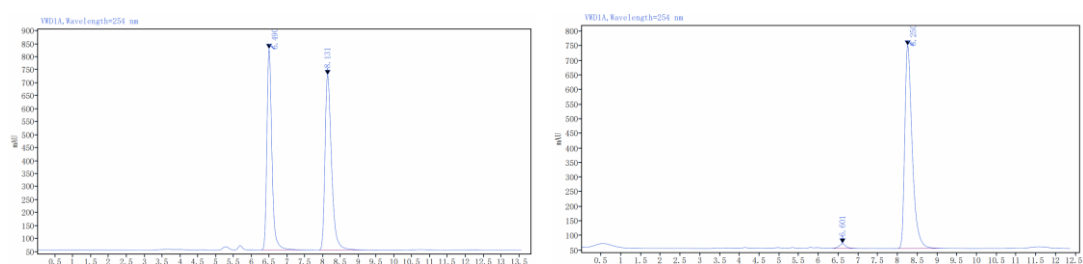

| Peak  | RetTime [min] | Type | Width[min] | Area[mAU*s] | Height[mAU] | Area%   | Peak  | RetTime [min] | Type | Width[min] | Area[mAU*s] | Height[mAU] | Area%   |
|-------|---------------|------|------------|-------------|-------------|---------|-------|---------------|------|------------|-------------|-------------|---------|
| 6.490 | 6.490         | BB   | 1.3000     | 7570.6034   | 773.5950    | 46.7879 | 6.601 | 6.601         | VB   | 0.9071     | 209.1208    | 16.4376     | 2.2462  |
| 8.131 | 8.131         | BB   | 1.6879     | 8610.0730   | 673.1867    | 53.2121 | 8.250 | 8.250         | BB   | 1.4528     | 9100.8487   | 695.2932    | 97.7538 |

#### *tert*-Butyl (*S*)-2-amino-2-(2-fluoro-3-methoxy-6-nitrophenyl)propanoate (**3c**):

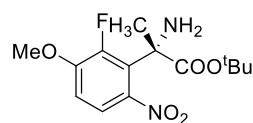

White solid (35.8 mg, 57%); m.p. = 81-82 °C;  $R_f = 0.27$  (petroleum ether/ethyl acetate = 2:1); the enantiomeric excess was determined to be 96% by HPLC analysis on Daicel Chirapak IG column (hexane/isopropanol = 70/30, flow rate 1.0 mL/min, T = 30 °C), UV 254 nm,  $t_R$ (major) 10.031 min,  $t_R$ (minor) 8.852 min;  $[\alpha]_D^{25} = 116.16$  (c = 0.30, CHCl<sub>3</sub>); <sup>1</sup>H NMR (600 MHz, CDCl<sub>3</sub>) δ 7.44 (d, J = 6.0 Hz, 1H), 6.90 (t, J = 9.0 Hz, 1H), 3.94 (s, 3H), 1.89 (s, 2H), 1.82 (d, J = 6.0 Hz, 3H), 1.44 (s, 9H); <sup>13</sup>C NMR (151 MHz, CDCl<sub>3</sub>) δ 173.96, 168.25, 154.38, 135.47, 131.26, 125.17, 124.24, 123.42, 119.20, 117.46, 116.46, 79.63, 61.78, 59.82, 30.96, 28.44, 24.11, 23.97, 14.05; HRMS(ESI) m/z: [M+H]<sup>+</sup> Calculated for C<sub>14</sub>H<sub>20</sub>FN<sub>2</sub>O<sub>5</sub><sup>+</sup> 315.1351; found 315.1352.

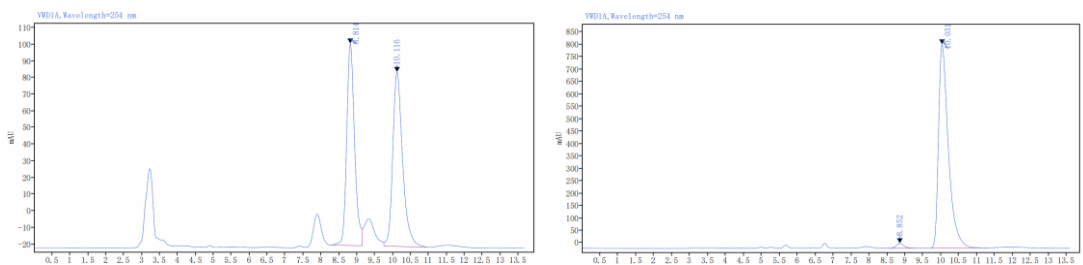

| Peak   | RetTime [min] | Type | Width[min] | Area[mAU*s] | Height[mAU] | Area%   | Peak   | RetTime [min] | Type | Width[min] | Area[mAU*s] | Height[mAU] | Area%   |
|--------|---------------|------|------------|-------------|-------------|---------|--------|---------------|------|------------|-------------|-------------|---------|
| 8.814  | 8.814         | BV   | 0.8695     | 1843.2860   | 121.1615    | 48.0142 | 8.852  | 8.852         | BB   | 0.9358     | 292.4944    | 19.0899     | 1.8388  |
| 10.116 | 10.116        | VB   | 1.2610     | 1995.7593   | 104.6251    | 51.9858 | 10.031 | 10.031        | BB   | 1.6443     | 15614.6763  | 820.5803    | 98.1612 |

***tert*-Butyl (*S*)-2-amino-2-(4-fluoro-5-methyl-2-nitrophenyl)propanoate (3ad):**

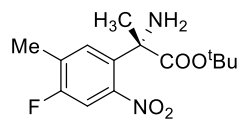

White solid (43.5 mg, 73%); m.p. = 85-87 °C;  $R_f$  = 0.42 (petroleum ether/ethyl acetate = 2:1); the enantiomeric excess was determined to be >99% by HPLC analysis on Daicel Chirapak IC column (hexane/isopropanol = 70/30, flow rate 1.0 mL/min,  $T$  = 30 °C), UV 254 nm,  $t_R$ (major) 6.792 min;  $[\alpha]_D^{25}$  = -39.38 ( $c$  = 0.77,  $\text{CHCl}_3$ );  $^1\text{H NMR}$  (600 MHz,  $\text{CDCl}_3$ )  $\delta$  7.77 (d,  $J$  = 6.0 Hz, 1H), 7.60 (d,  $J$  = 12.0 Hz, 1H), 2.36 (s, 3H), 2.12 (s, 2H), 1.74 (s, 3H), 1.40 (s, 9H);  $^{13}\text{C NMR}$  (151 MHz,  $\text{CDCl}_3$ )  $\delta$  173.68, 160.02, 158.37, 146.90, 146.85, 134.66, 134.63, 131.45, 131.42, 130.83, 130.72, 112.38, 112.20, 82.15, 60.03, 27.65, 27.56, 14.81, 14.79.; **HRMS(ESI)**  $m/z$ :  $[\text{M}+\text{H}]^+$  Calculated for  $\text{C}_{14}\text{H}_{20}\text{FN}_2\text{O}_4^+$  299.1402; found 299.1405.

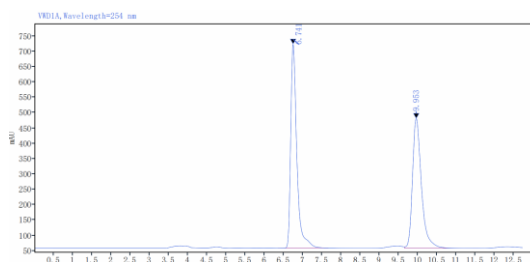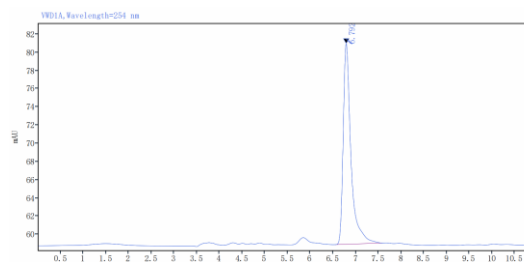

| Peak | RetTime [min] | Type | Width[min] | Area[mAU*s] | Height[mAU] | Area%   | Peak | RetTime [min] | Type | Width[min] | Area[mAU*s] | Height[mAU] | Area%    |
|------|---------------|------|------------|-------------|-------------|---------|------|---------------|------|------------|-------------|-------------|----------|
|      | 6.741         | BB   | 1.3167     | 7368.7933   | 664.2735    | 51.8851 |      | 6.792         | BB   | 1.0417     | 262.7770    | 22.0293     | 100.0000 |
|      | 9.953         | VB   | 1.9054     | 6833.3547   | 422.2931    | 48.1149 |      |               |      |            |             |             |          |

***tert*-Butyl (*S*)-2-amino-2-(5-chloro-4-methyl-2-nitrophenyl)propanoate (3ae):**

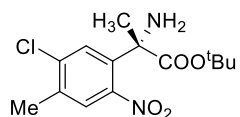

White solid (34.6 mg, 55%); m.p. = 89-90 °C;  $R_f$  = 0.58 (petroleum ether/ethyl acetate = 2:1); the enantiomeric excess was determined to be 94% by HPLC analysis on Daicel Chirapak IC column (hexane/isopropanol = 70/30, flow rate 1.0 mL/min,  $T$  = 30 °C), UV 254 nm,  $t_R$ (major) 7.353 min,  $t_R$ (minor) 9.440 min;  $[\alpha]_D^{25}$  = -44.03 ( $c$  = 0.54,  $\text{CHCl}_3$ );  $^1\text{H NMR}$  (600 MHz,  $\text{CDCl}_3$ )  $\delta$  7.91 (s, 1H), 7.79 (s, 1H), 2.42 (s, 3H), 2.19 (s, 2H), 1.74 (s, 3H), 1.40 (s, 9H);  $^{13}\text{C NMR}$  (151 MHz,  $\text{CDCl}_3$ )  $\delta$  173.32, 146.63, 139.48, 138.04, 136.50, 129.21, 127.20, 82.33, 60.03, 27.58, 27.48, 19.43; **HRMS(ESI)**  $m/z$ :  $[\text{M}+\text{H}]^+$  Calculated for  $\text{C}_{14}\text{H}_{20}\text{ClN}_2\text{O}_4^+$  315.1106; found 315.1109.

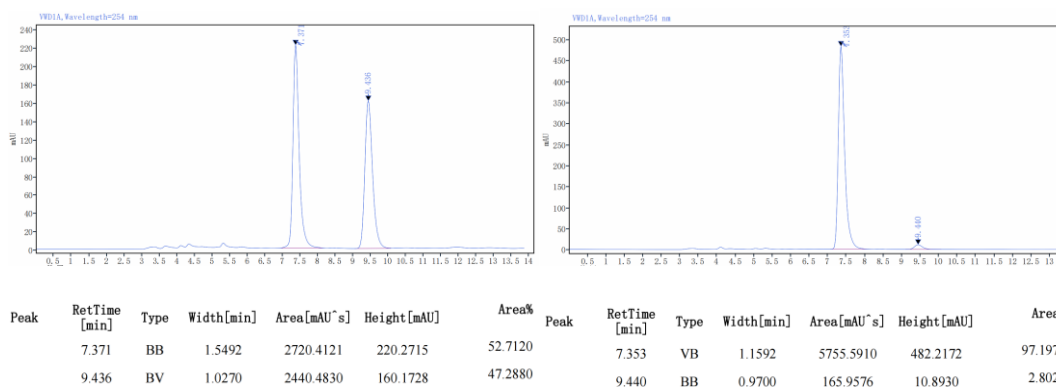

***tert*-Butyl (*S*)-2-amino-2-(2,4-dinitrophenyl)propanoate (3af):**

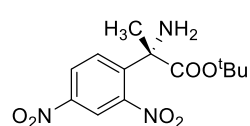

A pale yellow oil (33.0 mg, 50%);  $R_f = 0.62$  (petroleum ether/ ethyl acetate = 2:1); the enantiomeric excess was determined to be 91% by HPLC analysis on Daicel Chirapak IG column (hexane/isopropanol = 70/30, flow rate 1.0 mL/min,  $T = 30\text{ }^\circ\text{C}$ ), UV 254 nm,  $t_R(\text{major})$  14.257 min,  $t_R(\text{minor})$  11.888 min;  $[\alpha]_D^{25} = -130.02$  ( $c = 0.37$ ,  $\text{CHCl}_3$ );  $^1\text{H NMR}$  (600 MHz,  $\text{CDCl}_3$ )  $\delta$  8.67 (d,  $J = 2.4$  Hz, 1H), 8.41 (dd,  $J = 6.0, 2.4$  Hz, 1H), 8.22 (d,  $J = 12.0$  Hz, 1H), 1.97 (s, 2H), 1.81 (s, 3H), 1.42 (s, 9H);  $^{13}\text{C NMR}$  (151 MHz,  $\text{CDCl}_3$ )  $\delta$  172.45, 149.05, 146.93, 145.99, 130.36, 126.67, 120.30, 83.08, 60.64, 27.85, 27.62; **HRMS(ESI)  $m/z$ :  $[\text{M}+\text{Na}]^+$  Calculated for  $\text{C}_{13}\text{H}_{17}\text{N}_3\text{NaO}_6^+$  334.1010; found 334.1011.**

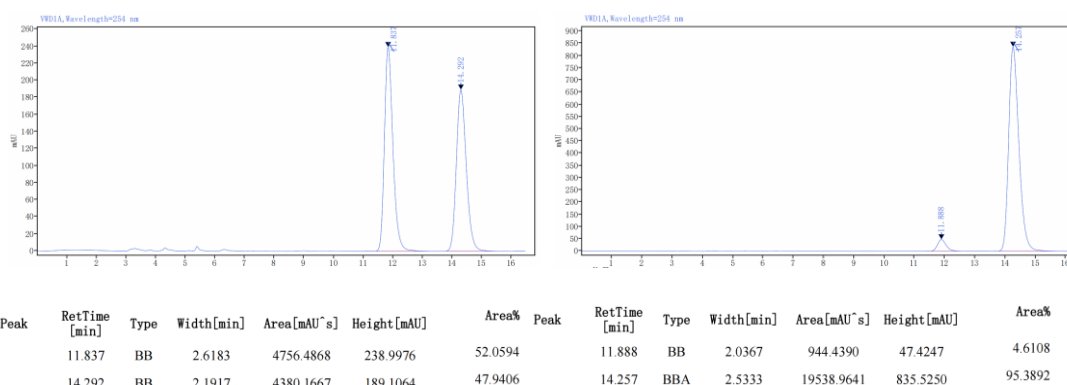

***tert*-Butyl (*S*)-2-amino-2-(4-cyano-2-nitrophenyl)propanoate (3ag):**

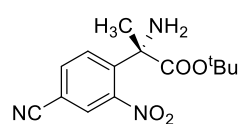

White solid (39.1 mg, 63%); m.p. = 78-79  $^\circ\text{C}$ ;  $R_f = 0.26$  (petroleum ether/ethyl acetate = 2:1); the enantiomeric excess was determined to be 96% by HPLC analysis on Daicel Chirapak IG column (hexane/isopropanol = 70/30, flow rate 1.0 mL/min,  $T = 30\text{ }^\circ\text{C}$ ), UV 254 nm,  $t_R(\text{major})$  9.585 min,  $t_R(\text{minor})$  7.666 min;  $[\alpha]_D^{25} = -178.52$  ( $c = 0.72$ ,  $\text{CHCl}_3$ );  $^1\text{H NMR}$  (600 MHz,  $\text{CDCl}_3$ )  $\delta$  8.15 – 8.12 (m, 2H), 7.86 (d,  $J = 12.0$  Hz, 1H), 2.02 (s, 2H), 1.78 (s, 3H), 1.41 (s, 9H);  $^{13}\text{C NMR}$  (151 MHz,  $\text{CDCl}_3$ )  $\delta$  172.52,

149.08, 144.36, 135.54, 130.03, 128.31, 116.39, 112.52, 82.90, 60.52, 27.71, 27.56; **HRMS(ESI)**  
 m/z:  $[M+H]^+$  Calculated for  $C_{14}H_{18}N_3O_4^+$  292.1292; found 292.1294.

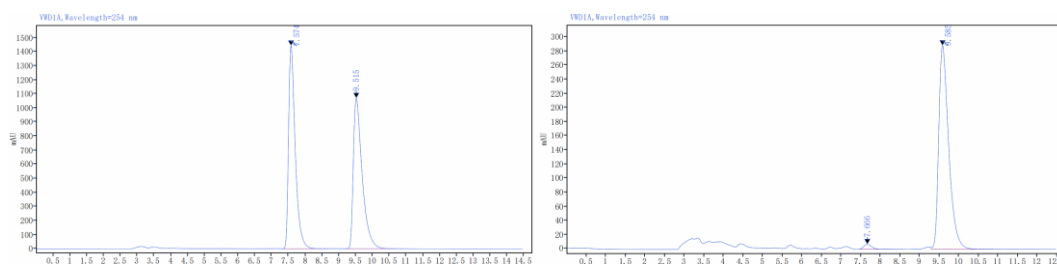

| Peak | RetTime [min] | Type | Width[min] | Area[mAU*s] | Height[mAU] | Area%   | Peak | RetTime [min] | Type | Width[min] | Area[mAU*s] | Height[mAU] | Area%   |
|------|---------------|------|------------|-------------|-------------|---------|------|---------------|------|------------|-------------|-------------|---------|
|      | 7.574         | BB   | 1.3639     | 19845.8646  | 1441.5398   | 50.4400 |      | 7.666         | BB   | 0.8889     | 95.3911     | 6.8158      | 1.8397  |
|      | 9.515         | BB   | 1.5261     | 19499.6151  | 1069.2173   | 49.5600 |      | 9.585         | VB   | 1.5964     | 5089.6235   | 288.4410    | 98.1603 |

***tert*-Butyl (*S*)-2-amino-2-(2-nitro-4-(trifluoromethyl)phenyl)propanoate (3ah):**

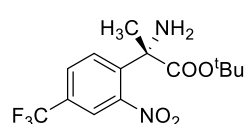

A pale yellow oil (59.4 mg, 85%);  $R_f = 0.63$  (petroleum ether/ethyl acetate = 2:1); the enantiomeric excess was determined to be 92% by HPLC analysis on Daicel Chirapak IG column (hexane/isopropanol = 70/30, flow rate 1 mL/min,  $T = 30\text{ }^\circ\text{C}$ ), UV 254 nm,  $t_R$ (major) 4.819 min,  $t_R$ (minor) 6.207 min;  $[\alpha]_D^{25} = -113.01$  ( $c = 0.50$ ,  $CHCl_3$ );  $^1H$  NMR (600 MHz,  $CDCl_3$ )  $\delta$  8.13 (d,  $J = 12.0$  Hz, 1H), 8.11 (s, 1H), 7.84 (d,  $J = 12.0$  Hz, 1H), 2.07 (s, 2H), 1.79 (s, 3H), 1.42 (s, 9H);  $^{13}C$  NMR (151 MHz,  $CDCl_3$ )  $\delta$  172.91, 148.91, 143.04, 131.10, 130.87, 130.64, 129.68, 129.16, 129.14, 129.12, 129.09, 125.51, 123.71, 122.18, 122.15, 122.12, 122.10, 121.90, 82.67, 60.41, 27.78, 27.57; **HRMS(ESI)** m/z:  $[M+H]^+$  Calculated for  $C_{14}H_{18}F_3N_2O_4^+$  335.1213; found 335.1215.

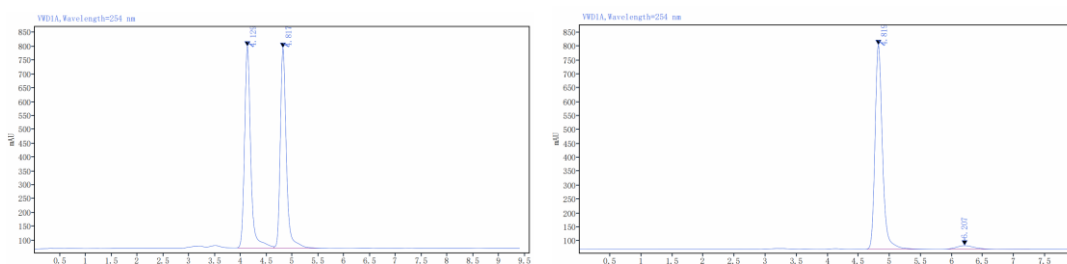

| Peak | RetTime [min] | Type | Width[min] | Area[mAU*s] | Height[mAU] | Area%   | Peak | RetTime [min] | Type | Width[min] | Area[mAU*s] | Height[mAU] | Area%   |
|------|---------------|------|------------|-------------|-------------|---------|------|---------------|------|------------|-------------|-------------|---------|
|      | 4.129         | BV   | 0.7560     | 6093.7444   | 727.5999    | 50.8625 |      | 4.819         | VB   | 1.1903     | 6089.9878   | 733.1863    | 96.1672 |
|      | 4.817         | VV   | 0.9090     | 5887.0736   | 722.8791    | 49.1375 |      | 6.207         | BB   | 1.4600     | 242.7169    | 12.3837     | 3.8328  |

**Methyl (*S*)-4-(2-amino-1-(*tert*-butoxy)-1-oxopropan-2-yl)-3-nitrobenzoate (3ai):**

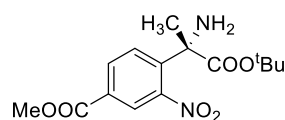

A pale yellow oil (46.8 mg, 69%);  $R_f = 0.45$  (petroleum ether/ethyl acetate = 2:1); the enantiomeric excess was determined to be 96% by HPLC analysis on Daicel Chirapak IC column (hexane/isopropanol =

70/30, flow rate 1 mL/min, T = 30 °C), UV 254 nm,  $t_R$ (major) 32.480 min,  $t_R$ (minor) 17.663 min;  $[\alpha]_D^{25} = -82.76$  (c = 0.71, CHCl<sub>3</sub>); <sup>1</sup>H NMR (600 MHz, CDCl<sub>3</sub>) δ 8.47 (s, 1H), 8.22 (d, J = 6.0 Hz, 1H), 8.02 (d, J = 6.0 Hz, 1H), 3.96 (s, 3H), 2.04 (s, 2H), 1.78 (s, 3H), 1.41 (s, 9H); <sup>13</sup>C NMR (151 MHz, CDCl<sub>3</sub>) δ 173.16, 164.87, 148.93, 143.58, 133.30, 130.43, 129.02, 126.03, 82.54, 60.47, 52.64, 27.86, 27.62; HRMS(ESI) m/z: [M+H]<sup>+</sup> Calculated for C<sub>15</sub>H<sub>21</sub>N<sub>2</sub>O<sub>6</sub><sup>+</sup> 325.1394; found 325.1395.

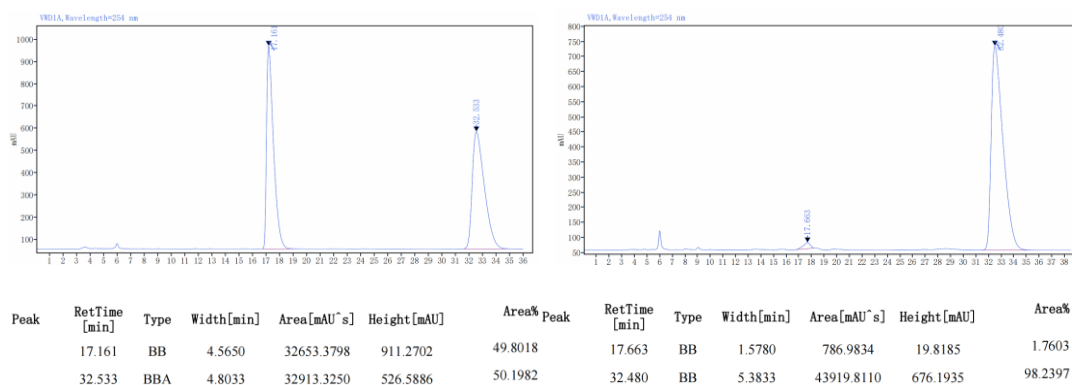

#### *tert*-Butyl (*S*)-2-amino-2-(2-nitro-5-(trifluoromethyl)phenyl)propanoate (3aj):

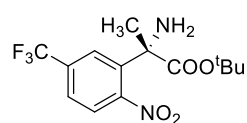

A pale yellow oil (52.1 mg, 74%);  $R_f = 0.73$  (petroleum ether/ethyl acetate = 2:1); the enantiomeric excess was determined to be 99% by HPLC analysis on Daicel Chirapak IC column (hexane/isopropanol = 70/30, flow rate 1 mL/min, T = 30 °C), UV 254 nm,  $t_R$ (major) 6.259 min,  $t_R$ (minor) 9.549 min;  $[\alpha]_D^{25} = -92.15$  (c = 0.45, CHCl<sub>3</sub>); <sup>1</sup>H NMR (600 MHz, CDCl<sub>3</sub>) δ 8.26 (s, 1H), 7.93 (d, J = 6.0 Hz, 1H), 7.69 (d, J = 12.0 Hz, 1H), 2.06 (s, 2H), 1.80 (s, 3H), 1.42 (s, 9H); <sup>13</sup>C NMR (151 MHz, CDCl<sub>3</sub>) δ 172.88, 150.82, 140.35, 134.58, 134.36, 134.14, 133.92, 126.19, 126.17, 126.14, 126.12, 125.36, 125.26, 125.24, 125.21, 125.19, 123.97, 122.17, 82.68, 60.37, 27.77, 27.55; HRMS(ESI) m/z: [M+H]<sup>+</sup> Calculated for C<sub>14</sub>H<sub>18</sub>F<sub>3</sub>N<sub>2</sub>O<sub>4</sub><sup>+</sup> 335.1213; found 335.1215.

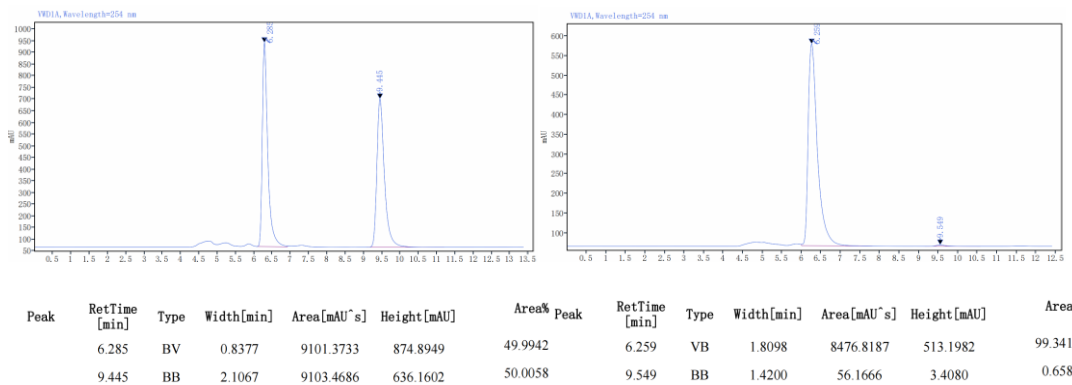

***tert*-Butyl (*S*)-2-amino-2-(5-nitroquinolin-8-yl)propanoate (**3ak**):**

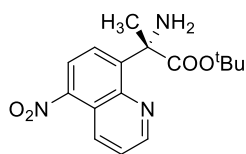

White solid (39.2 mg, 62%); m.p. = 88-89 °C;  $R_f$  = 0.28 (petroleum ether/ethyl acetate = 2:1); the enantiomeric excess was determined to be 70% by HPLC analysis on Daicel Chirapak IC column (hexane/isopropanol = 70/30, flow rate 1 mL/min, T = 30 °C), UV 254 nm,  $t_R$ (major) 17.301 min,  $t_R$ (minor) 12.002 min;  $[\alpha]_D^{25}$  = -8.99 (c = 0.46, CHCl<sub>3</sub>); <sup>1</sup>H NMR (600 MHz, CDCl<sub>3</sub>) δ 9.04 (d, *J* = 6.0 Hz, 1H), 8.95 (d, *J* = 6.0 Hz, 1H), 8.38 (d, *J* = 6.0 Hz, 1H), 7.98 (d, *J* = 12.0 Hz, 1H), 7.62 (dd, *J* = 12.0, 6.0 Hz 1H), 2.40 (s, 2H), 1.83 (s, 3H), 1.25 (s, 9H); <sup>13</sup>C NMR (151 MHz, CDCl<sub>3</sub>) δ 176.21, 150.34, 149.54, 145.59, 144.76, 132.39, 124.55, 124.05, 123.43, 121.24, 80.71, 60.10, 27.63, 25.63; HRMS(ESI) *m/z*: [M+H]<sup>+</sup> Calculated for C<sub>16</sub>H<sub>20</sub>N<sub>3</sub>O<sub>4</sub><sup>+</sup> 318.1448; found 318.1449.

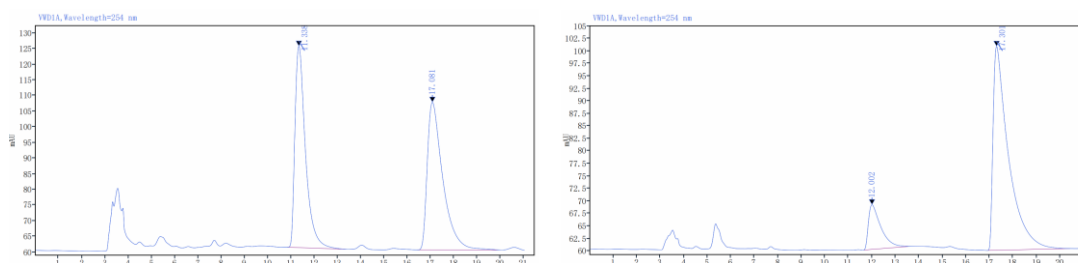

| Peak | RetTime [min] | Type | Width[min] | Area[mAU*s] | Height[mAU] | Area%   | Peak | RetTime [min] | Type | Width[min] | Area[mAU*s] | Height[mAU] | Area%   |
|------|---------------|------|------------|-------------|-------------|---------|------|---------------|------|------------|-------------|-------------|---------|
|      | 11.338        | BB   | 2.5333     | 2031.3182   | 64.4242     | 48.1401 |      | 12.002        | BB   | 1.9783     | 327.3358    | 8.9329      | 14.9145 |
|      | 17.081        | BB   | 3.6433     | 2188.2779   | 47.2373     | 51.8599 |      | 17.301        | BB   | 3.5133     | 1867.4167   | 40.7966     | 85.0855 |

***tert*-Butyl (*S*)-1-methyl-5-nitro-3-oxoisindoline-1-carboxylate (**3al**):**

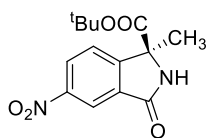

White solid (37.4 mg, 64%); m.p. = 124-126 °C;  $R_f$  = 0.27 (petroleum ether/ethyl acetate = 2:1); the enantiomeric excess was determined to be 75% by HPLC analysis on Daicel Chirapak IG column (hexane/isopropanol = 70/30, flow rate 1 mL/min, T = 30 °C), UV 254 nm,  $t_R$ (major) 22.616 min,  $t_R$ (minor) 10.133 min;  $[\alpha]_D^{25}$  = -9.97 (c = 0.49, CHCl<sub>3</sub>); <sup>1</sup>H NMR (600 MHz, CDCl<sub>3</sub>) δ 8.65 (d, *J* = 6.0 Hz, 1H), 8.48 (m, 1H), 7.85 (d, *J* = 12.0 Hz, 1H), 7.38 (s, 1H), 1.84 (s, 3H), 1.47 (s, 9H); <sup>13</sup>C NMR (101 MHz, CDCl<sub>3</sub>) δ 168.63, 167.22, 152.01, 149.08, 132.58, 127.25, 124.51, 119.49, 84.21, 65.45, 27.78, 25.53; HRMS(ESI) *m/z*: [M+H]<sup>+</sup> Calculated for C<sub>14</sub>H<sub>17</sub>N<sub>2</sub>O<sub>5</sub><sup>+</sup> 293.1132; found 293.1131.



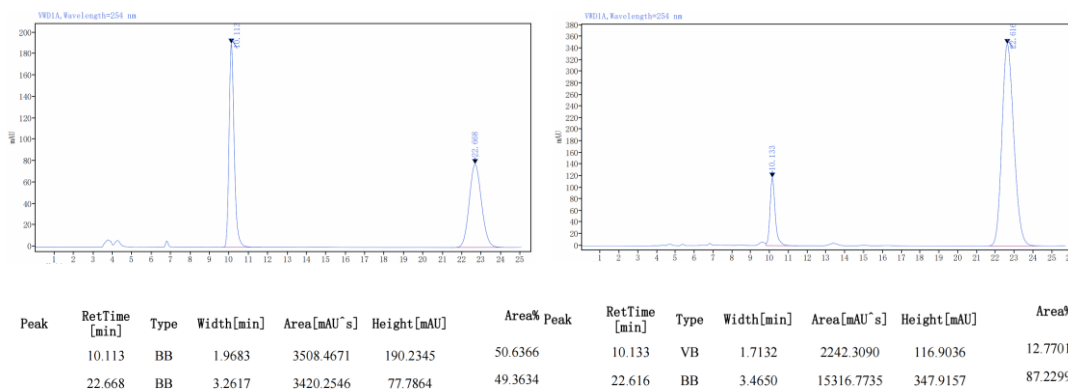

### *tert*-Butyl (*S*)-1-(2-(methylthio)ethyl)-5-nitro-3-oxoisindoline-1-carboxylate (**3am**):

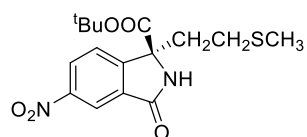

A pale yellow oil (41.0 mg, 58%);  $R_f = 0.34$  (petroleum ether/ethyl acetate = 2:1); the enantiomeric excess was determined to be 67% by HPLC analysis on Daicel Chirapak IG column (hexane/isopropanol = 70/30, flow rate 1 mL/min,  $T = 30\text{ }^\circ\text{C}$ ), UV 254 nm,  $t_R(\text{major})$  23.316 min,  $t_R(\text{minor})$  20.853 min;  $[\alpha]_D^{25} = 2.64$  ( $c = 0.32$ ,  $\text{CHCl}_3$ );  $^1\text{H NMR}$  (600 MHz,  $\text{CDCl}_3$ )  $\delta$  8.65 (s, 1H), 8.48 (d,  $J = 6.0$  Hz, 1H), 7.85 (d,  $J = 6.0$  Hz, 1H), 7.48 (s, 1H), 2.67 – 2.62 (m, 1H), 2.55 – 2.50 (m, 1H), 2.37 – 2.33 (m, 1H), 2.24 – 2.19 (m, 1H), 2.08 (s, 3H), 1.48 (s, 9H);  $^{13}\text{C NMR}$  (151 MHz,  $\text{CDCl}_3$ )  $\delta$  167.81, 167.46, 150.46, 149.28, 132.84, 127.34, 124.44, 119.60, 84.64, 68.58, 37.81, 28.82, 27.82, 15.63; **HRMS(ESI)**  $m/z$ :  $[\text{M}+\text{H}]^+$  Calculated for  $\text{C}_{16}\text{H}_{20}\text{N}_2\text{NaO}_5\text{S}^+$  375.0985; found 375.0986.

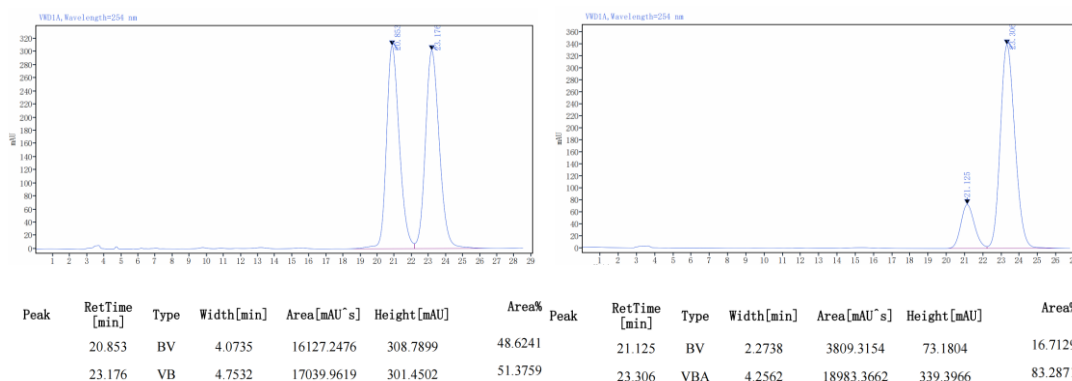

### 3.2 General procedure for the asymmetric $\alpha$ -allylation

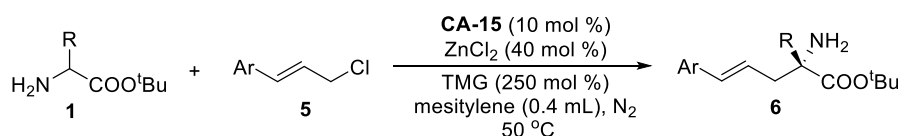

Under nitrogen atmosphere, amino acid ester **1** (0.30 mmol), allylic chloride derivative **5** (0.20 mmol), chiral aldehyde **CA-15** (11.8 mg, 0.02 mmol),  $\text{ZnCl}_2$  (10.9 mg, 0.08 mmol), TMG (57.5 mg,

0.50 mmol) and super dry mesitylene (0.4 ml) were added to a 10 mL vial. The mixture was continuously stirred at indicated reaction temperature under nitrogen atmosphere. After the reaction completed (detected by TLC), the solvent was removed by rotary evaporation, and the residue was purified by flash chromatography column on silica gel (eluent: petroleum ether/ ethyl acetate/ triethylamine =200/100/3).

***tert*-Butyl (*S*, *E*)-2-amino-2-methyl-5-phenylpent-4-enoate (6a) [3]:**

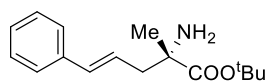

Colorless oil (38.7 mg, 74%);  $R_f = 0.33$  (petroleum ether/ ethyl acetate = 2:1); the enantiomeric excess was determined to be 94% by HPLC analysis on Daicel Chirapak IA column (hexane/isopropanol = 90/10, flow rate 1.0 mL/min,  $T = 30$  °C), UV 254 nm,  $t_R$ (major) 5.992 min,  $t_R$ (minor) 7.381 min;  $[\alpha]_D^{20} = -10.83$  ( $c = 0.74$ ,  $\text{CHCl}_3$ );  $^1\text{H NMR}$  (600 MHz,  $\text{CDCl}_3$ )  $\delta$  7.32 (d,  $J = 6.0$  Hz, 2H), 7.30 – 7.26 (m, 2H), 7.20 (t,  $J = 9.0$  Hz, 1H), 6.47 (d,  $J = 18.0$  Hz, 1H), 6.16 – 6.11 (m, 1H), 2.64 (dd,  $J = 12.0, 6.0$  Hz, 1H), 2.39 (dd,  $J = 13.6, 8.3$  Hz, 1H), 1.67 (s, 2H), 1.47 (s, 9H), 1.33 (s, 3H);  $^{13}\text{C NMR}$  (151 MHz,  $\text{CDCl}_3$ )  $\delta$  176.37, 137.27, 133.95, 128.49, 127.28, 126.15, 124.82, 80.92, 58.09, 44.55, 28.03, 26.42.

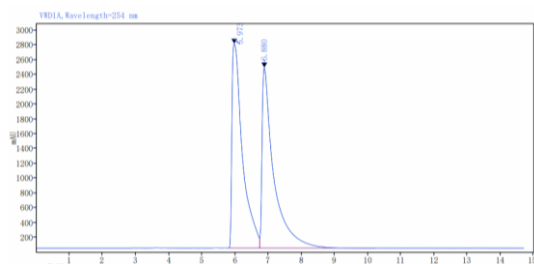

| Peak | RetTime [min] | Type | Width[min] | Area[mAU*s] | Height[mAU] | Area%   |
|------|---------------|------|------------|-------------|-------------|---------|
|      | 5.973         | VV   | 0.9723     | 60748.0606  | 2752.0737   | 50.4644 |
|      | 6.880         | VB   | 3.4938     | 59629.9047  | 2430.7847   | 49.5356 |

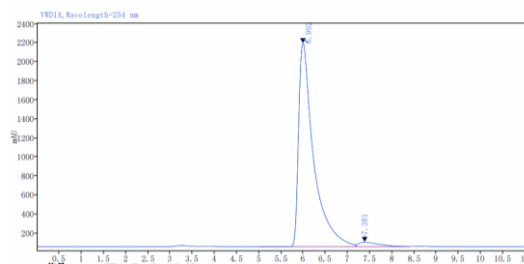

| Peak | RetTime [min] | Type | Width[min] | Area[mAU*s] | Height[mAU] | Area%   |
|------|---------------|------|------------|-------------|-------------|---------|
|      | 5.992         | BV   | 2.1763     | 50143.3855  | 2137.0863   | 96.9955 |
|      | 7.381         | VV   | 1.2113     | 1553.2055   | 47.3853     | 3.0045  |

***tert*-Butyl (*S*, *E*)-2-amino-2-methyl-5-(4-(trifluoromethyl)phenyl)pent-4-enoate (6b) [3]:**

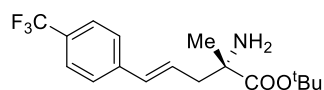

Colorless oil (44.8 mg, 68%);  $R_f = 0.44$  (petroleum ether/ ethyl acetate = 2:1); the enantiomeric excess was determined to be 95% by HPLC analysis on Daicel Chirapak AD-H column (hexane/isopropanol = 95/5, flow rate 1.0 mL/min,  $T = 30$  °C), UV 254 nm,  $t_R$ (major) 7.858 min,  $t_R$ (minor) 9.360 min;  $[\alpha]_D^{20} = -6.56$  ( $c = 0.78$ ,  $\text{CHCl}_3$ );  $^1\text{H NMR}$  (600 MHz,  $\text{CDCl}_3$ )  $\delta$  7.56 (s, 1H), 7.50 (d,  $J = 6.0$  Hz, 1H), 7.46 (d,  $J = 6.0$  Hz, 1H), 7.40 (t,  $J = 6.0$  Hz, 1H), 6.51 (d,  $J = 18.0$  Hz, 1H), 6.27 – 6.22 (m, 1H), 2.65 (dd,  $J = 12.0, 6.0$  Hz, 1H), 2.44 (dd,  $J = 12.0, 6.0$  Hz, 1H), 1.78 (s, 2H), 1.47 (s, 9H), 1.35 (s, 3H);  $^{13}\text{C NMR}$  (151 MHz,  $\text{CDCl}_3$ )  $\delta$  176.13, 138.01, 132.50, 131.12, 130.90, 129.24, 128.94, 127.09, 125.01, 123.85, 123.83, 123.80,

123.78, 123.21, 122.83, 122.81, 122.78, 122.75, 81.14, 58.09, 44.38, 27.99, 26.30.

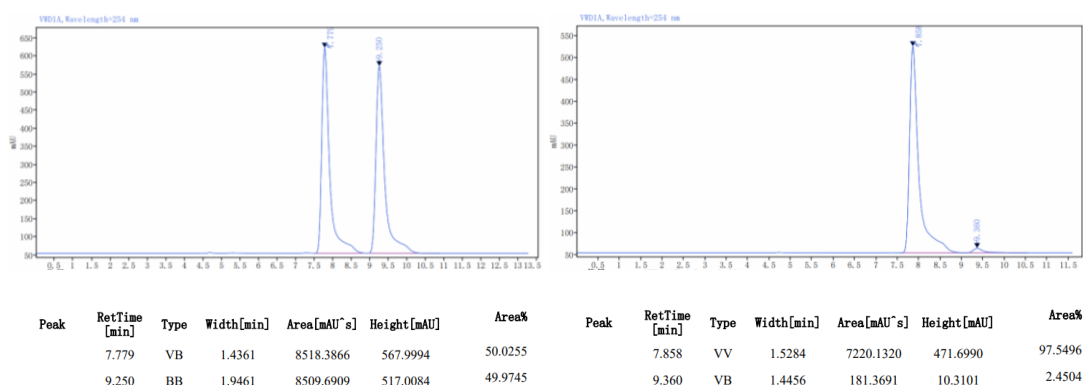

***tert*-Butyl (*S*, *E*)-2-amino-2-methyl-5-(4-(trifluoromethoxy)phenyl)pent-4-enoate (**6c**):**

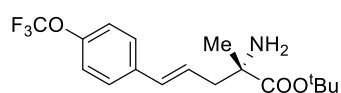

Colorless oil (37.3 mg, 54%);  $R_f = 0.47$  (petroleum ether/ ethyl acetate = 2:1); the enantiomeric excess was determined to be 96%

by HPLC analysis on Daicel Chirapak AD-H column (hexane/isopropanol = 95/5, flow rate 1.0 mL/min,  $T = 30\text{ }^\circ\text{C}$ ), UV 254 nm,  $t_{R(\text{major})} 7.565$  min,  $t_{R(\text{minor})} 9.114$  min;  $[\alpha]_D^{20} = -6.69$  ( $c = 0.61$ ,  $\text{CHCl}_3$ );  $^1\text{H NMR}$  (600 MHz,  $\text{CDCl}_3$ )  $\delta$  7.56 (s, 1H), 7.50 (d,  $J = 6.0$  Hz, 1H), 7.46 (d,  $J = 12.0$  Hz, 1H), 7.40 (t,  $J = 9.0$  Hz, 1H), 6.50 (d,  $J = 12.0$  Hz, 1H), 6.26 – 6.21 (m, 1H), 2.65 (dd,  $J = 12.0, 6.0$  Hz, 1H), 2.43 (dd,  $J = 18.0, 12.0$  Hz, 1H), 1.71 (s, 2H), 1.47 (s, 9H), 1.35 (s, 3H);  $^{13}\text{C NMR}$  (151 MHz,  $\text{CDCl}_3$ )  $\delta$  176.18, 138.01, 132.49, 131.12, 130.91, 129.24, 128.94, 127.11, 123.84, 123.81, 122.81, 122.78, 81.13, 77.19, 76.98, 76.77, 58.08, 44.40, 28.00, 26.33; **HRMS(ESI)**  $m/z$ :  $[\text{M}+\text{H}]^+$  Calculated for  $\text{C}_{17}\text{H}_{22}\text{F}_3\text{NO}_3^+$  346.1625; found 346.1776.

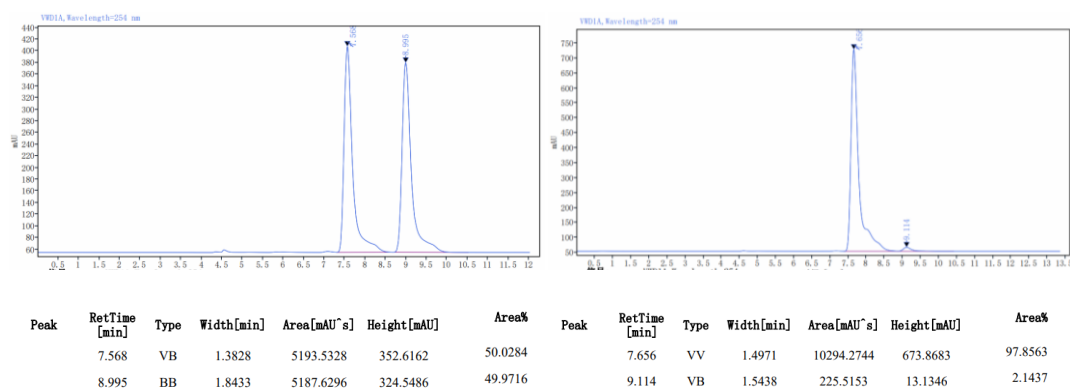

***tert*-Butyl (*S*, *E*)-2-amino-5-(4-chlorophenyl)-2-methylpent-4-enoate (**6d**)<sup>[3]</sup>:**

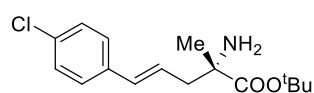

Colorless oil (35.4 mg, 60%);  $R_f = 0.39$  (petroleum ether/ ethyl acetate = 2:1); the enantiomeric excess was determined to be 96% by HPLC

analysis on Daicel Chirapak AD-H column (hexane/isopropanol = 90/10, flow rate 1.0 mL/min,  $T$

= 30 °C), UV 254 nm,  $t_R(\text{major})$  5.345 min,  $t_R(\text{minor})$  7.049 min;  $[\alpha]_D^{20} = -10.68$  ( $c = 0.70$ ,  $\text{CHCl}_3$ );  $^1\text{H NMR}$  (600 MHz,  $\text{CDCl}_3$ )  $\delta$  7.17 (s, 4H), 6.35 (d,  $J = 18.0$  Hz, 1H), 6.07 – 6.02 (m, 1H), 2.55 (dd,  $J = 12.0, 6.0$  Hz, 1H), 2.31 (dd,  $J = 12.0, 6.0$  Hz, 1H), 1.69 (s, 2H), 1.39 (s, 9H), 1.26 (s, 3H);  $^{13}\text{C NMR}$  (151 MHz,  $\text{CDCl}_3$ )  $\delta$  176.23, 135.74, 132.91, 132.66, 128.65, 127.33, 125.62, 81.01, 58.07, 44.46, 28.01, 26.35.

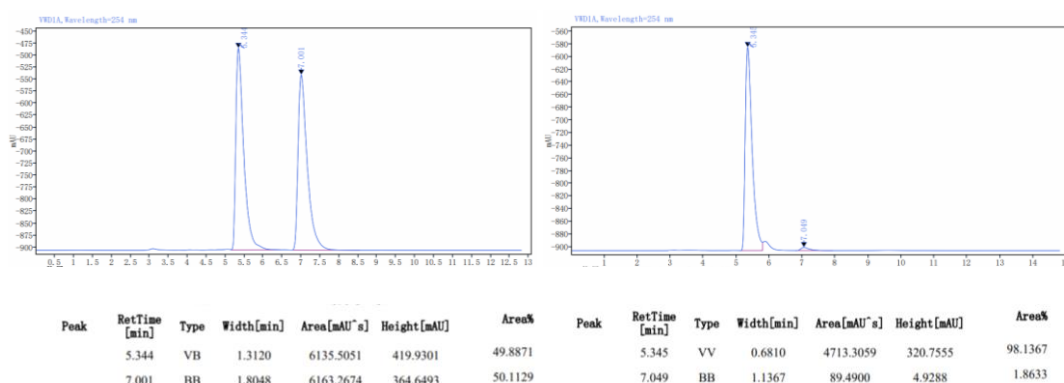

***tert*-Butyl (*S, E*)-2-amino-5-(4-bromophenyl)-2-methylpent-4-enoate (6e):**

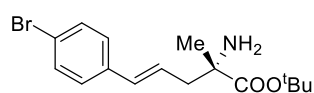

Colorless oil (40.7 mg, 51%);  $R_f = 0.34$  (petroleum ether/ ethyl acetate = 2:1); the enantiomeric excess was determined to be 94% by HPLC analysis on Daicel Chirapak AD-H column (hexane/isopropanol = 90/10, flow rate 1.0 mL/min,  $T = 30$  °C), UV 254 nm,  $t_R(\text{major})$  5.641 min,  $t_R(\text{minor})$  7.558 min;  $[\alpha]_D^{20} = -10.3$  ( $c = 0.38$ ,  $\text{CHCl}_3$ );  $^1\text{H NMR}$  (600 MHz,  $\text{CDCl}_3$ )  $\delta$  7.41 (d,  $J = 6.0$  Hz, 2H), 7.19 (d,  $J = 6.0$  Hz, 2H), 6.40 (d,  $J = 18.0$  Hz, 1H), 6.16 – 6.11 (m, 1H), 2.62 (dd,  $J = 12.0, 6.0$  Hz, 1H), 2.38 (dd,  $J = 12.0, 6.0$  Hz, 1H), 1.74 (s, 2H), 1.46 (s, 9H), 1.33 (s, 3H);  $^{13}\text{C NMR}$  (151 MHz,  $\text{CDCl}_3$ )  $\delta$  176.22, 136.18, 132.72, 131.61, 127.67, 125.77, 121.02, 81.04, 58.07, 44.47, 28.02, 26.35; **HRMS(ESI)**  $m/z$ :  $[\text{M}+\text{H}]^+$  Calculated for  $\text{C}_{16}\text{H}_{22}\text{BrNO}_2^+$  340.0907; found 340.0908.

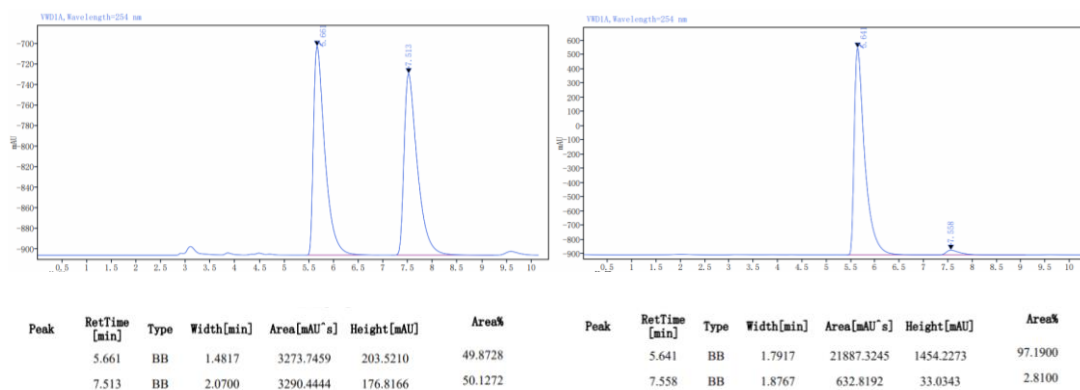

***tert*-Butyl (*S*, *E*)-2-amino-5-(4-fluorophenyl)-2-methylpent-4-enoate (**6f**)<sup>[3]</sup>:**

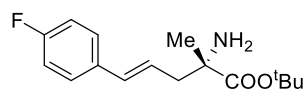

Colorless oil (39.6 mg, 71%);  $R_f = 0.51$  (petroleum ether/ ethyl acetate = 3:1); the enantiomeric excess was determined to be 95% by HPLC

analysis on Daicel Chirapak AD-H column (hexane/isopropanol = 90/10, flow rate 1.0 mL/min,  $T = 30\text{ }^\circ\text{C}$ ), UV 254 nm,  $t_R(\text{major})$  4.985 min,  $t_R(\text{minor})$  5.994 min;  $[\alpha]_D^{20} = -8.64$  ( $c = 0.61$ ,  $\text{CHCl}_3$ ); **<sup>1</sup>H NMR (600 MHz,  $\text{CDCl}_3$ )**  $\delta$  7.29 – 7.27 (m, 2H), 6.97 (t,  $J = 9.0$  Hz, 2H), 6.44 (d,  $J = 18.0$  Hz, 1H), 6.08 – 6.03 (m, 1H), 2.62 (dd,  $J = 18.0, 12.0$  Hz, 1H), 2.38 (dd,  $J = 18.0, 12.0$  Hz, 1H), 1.73 (s, 2H), 1.47 (s, 9H), 1.33 (s, 3H); **<sup>13</sup>C NMR (151 MHz,  $\text{CDCl}_3$ )**  $\delta$  176.30, 162.99, 161.35, 133.43, 133.41, 132.71, 127.61, 127.56, 124.56, 115.43, 115.29, 80.96, 58.53, 44.44, 28.44, 26.36.

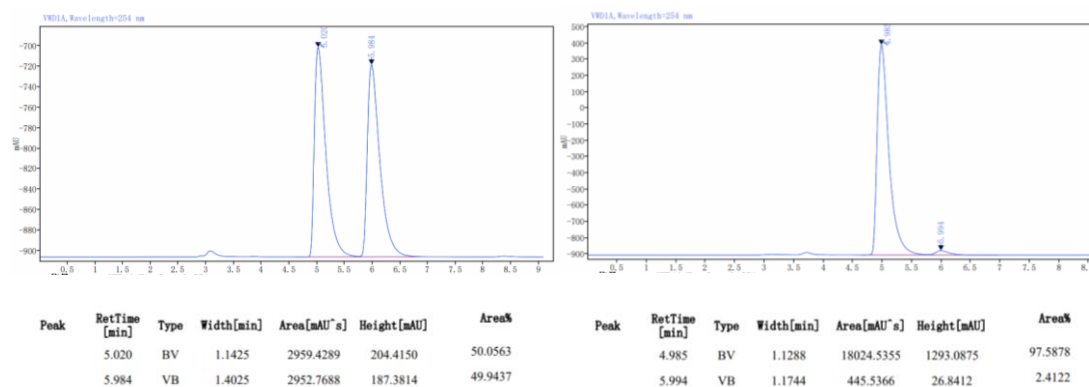

***tert*-Butyl (*S*, *E*)-2-amino-2-methyl-5-(3-(trifluoromethyl)phenyl)pent-4-enoate (**6g**):**

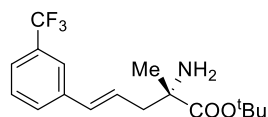

Colorless oil (45.3 mg, 69%);  $R_f = 0.39$  (petroleum ether/ ethyl acetate = 2:1); the enantiomeric excess was determined to be 95% by HPLC

analysis on Daicel Chirapak AD-H column (hexane/isopropanol = 95/5, flow rate 1.0 mL/min,  $T = 30\text{ }^\circ\text{C}$ ), UV 254 nm,  $t_R(\text{major})$  5.149 min,  $t_R(\text{minor})$  6.150 min;  $[\alpha]_D^{20} = -8.96$  ( $c = 0.80$ ,  $\text{CHCl}_3$ ); **<sup>1</sup>H NMR (600 MHz,  $\text{CDCl}_3$ )**  $\delta$  7.56 (s, 1H), 7.49 (d,  $J = 12.0$  Hz, 1H), 7.46 (d,  $J = 12.0$  Hz, 1H), 7.40 (t,  $J = 6.0$  Hz, 1H), 6.50 (d,  $J = 12.0$  Hz, 1H), 6.26 – 6.21 (m, 1H), 2.65 (dd,  $J = 12.0, 6.0$  Hz, 1H), 2.42 (dd,  $J = 12.0, 6.0$  Hz, 1H), 1.68 (s, 2H), 1.47 (s, 9H), 1.35 (s, 3H); **<sup>13</sup>C NMR (151 MHz,  $\text{CDCl}_3$ )**  $\delta$  176.19, 138.02, 132.48, 131.13, 130.91, 129.24, 128.94, 127.13, 123.84, 123.81, 123.78, 122.83, 122.81, 122.78, 122.76, 81.12, 58.08, 44.41, 28.00, 26.33; **HRMS(ESI)**  $m/z$ :  $[\text{M}+\text{H}]^+$  Calculated for  $\text{C}_{17}\text{H}_{22}\text{F}_3\text{NO}_2^+$  330.1675; found 330.1673.

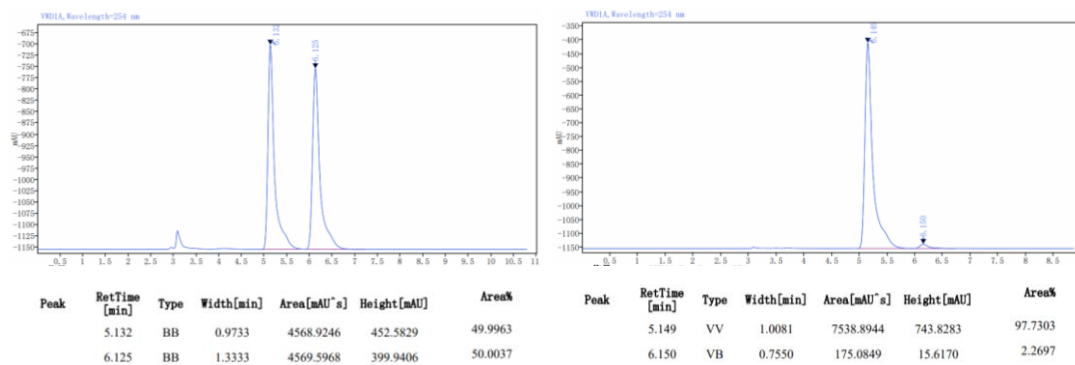

***tert*-Butyl (*S*, *E*)-2-amino-5-(3-fluorophenyl)-2-methylpent-4-enoate (6h) [3]:**

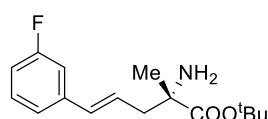

Colorless oil (37.2 mg, 67%);  $R_f = 0.44$  (petroleum ether/ ethyl acetate = 3:1); the enantiomeric excess was determined to be 94% by HPLC

analysis on Daicel Chirapak AD-H column (hexane/isopropanol = 95/5, flow rate 1.0 mL/min,  $T = 30\text{ }^\circ\text{C}$ ), UV 254 nm,  $t_R$ (major) 6.192 min,  $t_R$ (minor) 7.208 min;  $[\alpha]_D^{20} = -8.88$  ( $c = 0.53$ ,  $\text{CHCl}_3$ );  $^1\text{H NMR}$  (600 MHz,  $\text{CDCl}_3$ )  $\delta$  7.26 – 7.22 (m, 1H), 7.09 (d,  $J = 6.0$  Hz, 1H), 7.02 (d,  $J = 12.0$  Hz, 1H), 6.90 (t,  $J = 9.0$  Hz, 1H), 6.44 (d,  $J = 12.0$  Hz, 1H), 6.19 – 6.13 (m, 1H), 2.63 (dd,  $J = 18.0, 12.0$  Hz, 1H), 2.40 (dd,  $J = 18.0, 12.0$  Hz, 1H), 1.65 (s, 2H), 1.47 (s, 9H), 1.34 (s, 3H);  $^{13}\text{C NMR}$  (151 MHz,  $\text{CDCl}_3$ )  $\delta$  176.24, 163.94, 162.32, 139.63, 139.58, 132.83, 132.81, 129.94, 129.89, 126.40, 122.01, 121.99, 114.14, 113.99, 112.66, 112.52, 81.05, 58.07, 44.40, 28.02, 26.38.

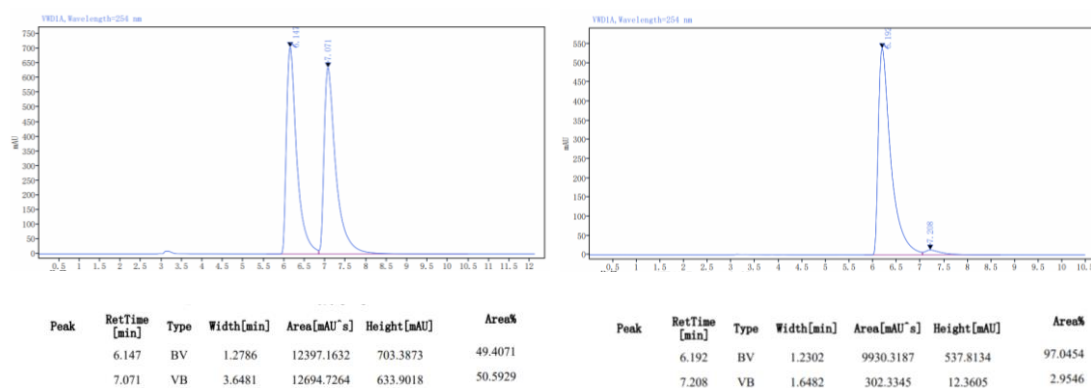

***tert*-Butyl (*S*, *E*)-2-amino-2-methyl-5-(*m*-tolyl)pent-4-enoate (6i):**

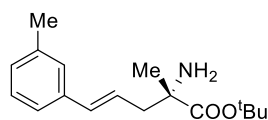

Colorless oil (33.6 mg, 61%);  $R_f = 0.28$  (petroleum ether/ ethyl acetate = 3:1); the enantiomeric excess was determined to be 96% by HPLC

analysis on Daicel Chirapak AD-H column (hexane/isopropanol = 90/10, flow rate 1.0 mL/min,  $T = 30\text{ }^\circ\text{C}$ ), UV 254 nm,  $t_R$ (major) 4.603 min,  $t_R$ (minor) 5.135 min;  $[\alpha]_D^{20} = -10.06$  ( $c = 0.66$ ,  $\text{CHCl}_3$ );  $^1\text{H NMR}$  (600 MHz,  $\text{CDCl}_3$ )  $\delta$  7.18 (t,  $J = 9.0$  Hz, 1H), 7.13 (t,  $J = 6.0$  Hz, 2H), 7.03 (d,  $J = 6.0$  Hz, 1H), 6.45 (d,  $J = 18.0$  Hz, 1H), 6.15 – 6.10 (m, 1H), 2.63 (dd,  $J = 12.0, 6.0$  Hz, 1H), 2.38 (dd,  $J = 18.0, 12.0$  Hz, 1H), 1.65 (s, 2H), 1.47 (s, 9H), 1.34 (s, 3H).

= 12.0, 6.0 Hz, 1H), 2.32 (s, 3H), 1.71 (s, 2H), 1.47 (s, 9H), 1.33 (s, 3H);  $^{13}\text{C}$  NMR (151 MHz,  $\text{CDCl}_3$ )  $\delta$  176.38, 138.02, 137.21, 134.05, 128.39, 128.08, 126.90, 124.54, 123.31, 80.92, 58.09, 44.53, 28.03, 26.40, 21.32; HRMS(ESI)  $m/z$ :  $[\text{M}+\text{H}]^+$  Calculated for  $\text{C}_{17}\text{H}_{25}\text{NO}_2^+$  276.1958; found 276.1953.

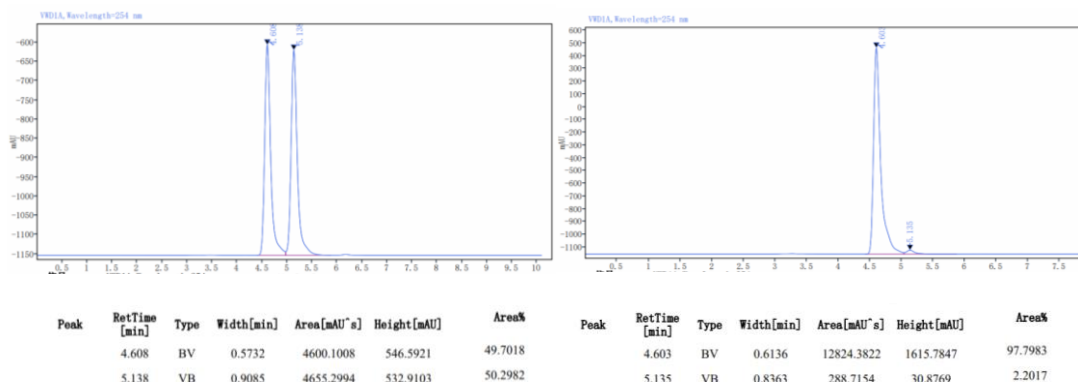

**tert-Butyl (S, E)-2-amino-5-(3,5-dimethoxyphenyl)-2-methylpent-4-enoate (6j):**

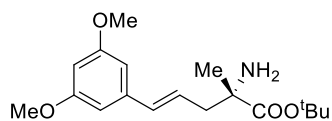

Colorless oil (34.7 mg, 54%);  $R_f = 0.28$  (petroleum ether/ ethyl acetate = 2:1); the enantiomeric excess was determined to be 94% by HPLC analysis on Daicel Chirapak IC column

(hexane/isopropanol = 92/8, flow rate 1.0 mL/min,  $T = 30^\circ\text{C}$ ), UV 254 nm,  $t_R$ (major) 7.606 min,  $t_R$ (minor) 9.052 min;  $[\alpha]_D^{20} = -14.25$  ( $c = 0.55$ ,  $\text{CHCl}_3$ );  $^1\text{H}$  NMR (600 MHz,  $\text{CDCl}_3$ )  $\delta$  6.49 (d,  $J = 2.3$  Hz, 2H), 6.40 (d,  $J = 18.0$  Hz, 1H), 6.35 (s, 1H), 6.15 – 6.11 (m, 1H), 3.78 (s, 6H), 2.63 (dd,  $J = 12.0, 6.0$  Hz, 1H), 2.39 (dd,  $J = 12.0, 6.0$  Hz, 1H), 1.69 (s, 2H), 1.47 (s, 9H), 1.33 (s, 3H);  $^{13}\text{C}$  NMR (151 MHz,  $\text{CDCl}_3$ )  $\delta$  176.30, 160.94, 139.29, 133.92, 125.36, 104.39, 99.67, 80.98, 58.09, 55.29, 44.43, 28.02, 26.39; HRMS(ESI)  $m/z$ :  $[\text{M}+\text{H}]^+$  Calculated for  $\text{C}_{18}\text{H}_{27}\text{NO}_4^+$  322.2013; found 322.2005.

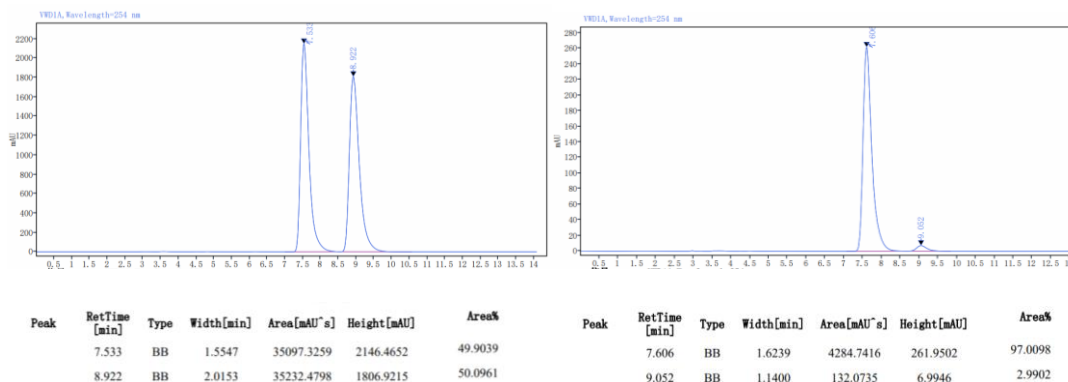

***tert*-Butyl (*S*, *E*)-2-amino-5-(2-chlorophenyl)-2-methylpent-4-enoate (**6k**):**

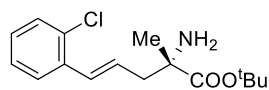

Colorless oil (43.2 mg, 73%);  $R_f = 0.44$  (petroleum ether/ ethyl acetate = 3:1); the enantiomeric excess was determined to be 82% by HPLC analysis on Daicel Chirapak IB column (hexane/isopropanol = 90/10, flow rate 1.0 mL/min,  $T = 30$  °C), UV 254 nm,  $t_R$ (major) 4.953 min,  $t_R$ (minor) 6.013 min;  $[\alpha]_D^{20} = -8.04$  ( $c = 0.79$ ,  $\text{CHCl}_3$ );  $^1\text{H NMR}$  (600 MHz,  $\text{CDCl}_3$ )  $\delta$  7.48 (d,  $J = 6.0$  Hz, 1H), 7.33 (d,  $J = 6.0$  Hz, 1H), 7.20 – 7.14 (m, 2H), 6.85 (d,  $J = 18.0$  Hz, 1H), 6.17 – 6.12 (m, 1H), 2.67 (dd,  $J = 12.0, 6.0$  Hz, 1H), 2.45 (dd,  $J = 12.0, 6.0$  Hz, 1H), 1.68 (s, 2H), 1.47 (s, 9H), 1.35 (s, 3H);  $^{13}\text{C NMR}$  (151 MHz,  $\text{CDCl}_3$ )  $\delta$  176.24, 135.37, 132.74, 130.10, 129.63, 128.29, 127.86, 126.84, 126.76, 81.07, 58.05, 44.62, 28.02, 26.42; **HRMS(ESI)**  $m/z$ :  $[M+H]^+$  Calculated for  $\text{C}_{16}\text{H}_{22}\text{ClNO}_2^+$  296.1412; found 296.1413.

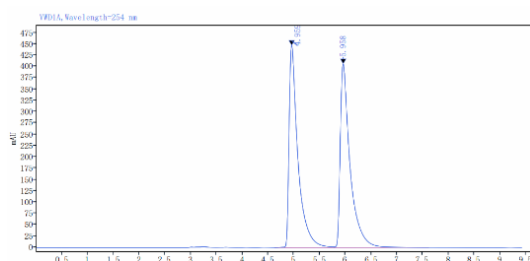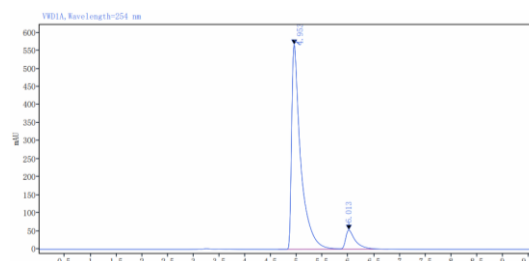

| Peak  | RetTime [min] | Type | Width[min] | Area[mAU*s] | Height[mAU] | Area%   |
|-------|---------------|------|------------|-------------|-------------|---------|
| 4.959 | 4.959         | VV   | 1.1627     | 5347.6930   | 446.7169    | 49.8755 |
| 5.958 | 5.958         | VB   | 1.8345     | 5374.3912   | 405.7339    | 50.1245 |

| Peak  | RetTime [min] | Type | Width[min] | Area[mAU*s] | Height[mAU] | Area%   |
|-------|---------------|------|------------|-------------|-------------|---------|
| 4.953 | 4.953         | BV   | 1.1982     | 6931.1493   | 566.6859    | 90.8423 |
| 6.013 | 6.013         | VB   | 0.9401     | 698.7187    | 52.9051     | 9.1577  |

***tert*-Butyl (*S*, *E*)-2-amino-2-ethyl-5-phenylpent-4-enoate (**6l**) [3]:**

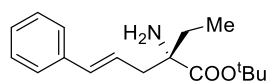

Colorless oil (31.4 mg, 57%);  $R_f = 0.51$  (petroleum ether/ ethyl acetate = 3:1); the enantiomeric excess was determined to be 92% by HPLC analysis on Daicel Chirapak AD-H column (hexane/isopropanol = 90/10, flow rate 1.0 mL/min,  $T = 30$  °C), UV 254 nm,  $t_R$ (major) 5.171 min,  $t_R$ (minor) 7.145 min;  $[\alpha]_D^{20} = -16.51$  ( $c = 0.22$ ,  $\text{CHCl}_3$ );  $^1\text{H NMR}$  (600 MHz,  $\text{CDCl}_3$ )  $\delta$  7.33 (d,  $J = 6.0$  Hz, 2H), 7.29 (t,  $J = 9.0$  Hz, 2H), 7.21 (t,  $J = 6.0$  Hz, 1H), 6.49 (d,  $J = 18.0$  Hz, 1H), 6.15 – 6.10 (m, 1H), 2.68 (dd,  $J = 12.0, 6.0$  Hz, 1H), 2.36 (dd,  $J = 12.0, 6.0$  Hz, 1H), 1.86 – 1.79 (m, 1H), 1.67 (s, 2H), 1.61 – 1.55 (m, 1H), 1.48 (s, 9H), 0.90 (t,  $J = 6.0$  Hz, 3H);  $^{13}\text{C NMR}$  (151 MHz,  $\text{CDCl}_3$ )  $\delta$  175.83, 137.25, 133.97, 128.50, 127.27, 126.15, 124.72, 80.97, 61.52, 43.39, 32.95, 28.09, 8.14.



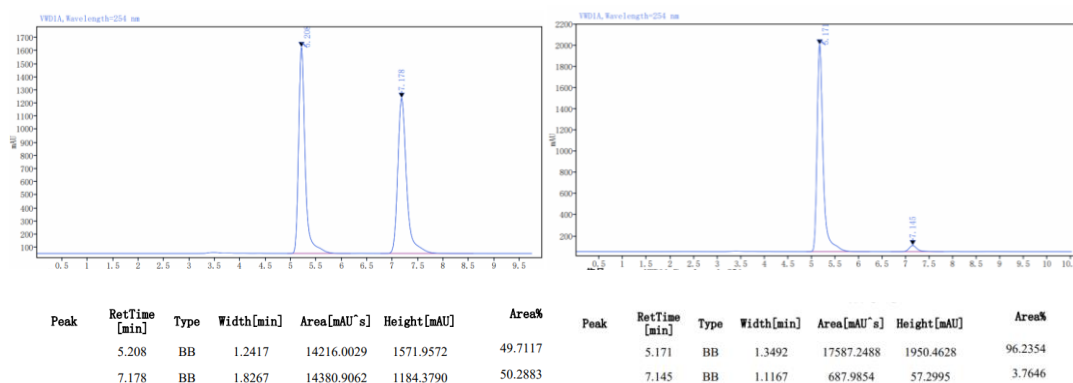

***tert*-Butyl (*S*, *E*)-2-amino-5-phenyl-2-propylpent-4-enoate (**6m**):**

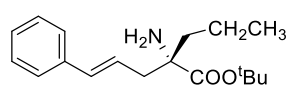

Colorless oil (28.4 mg, 49%);  $R_f = 0.64$  (petroleum ether/ ethyl acetate = 3:1); the enantiomeric excess was determined to be 95% by HPLC

analysis on Daicel Chirapak AD-H column (hexane/isopropanol = 95/5, flow rate 1.0 mL/min,  $T = 30\text{ }^\circ\text{C}$ ), UV 254 nm,  $t_R(\text{major})$  6.092 min,  $t_R(\text{minor})$  8.913 min;  $[\alpha]_D^{20} = -15.29$  ( $c = 0.51$ ,  $\text{CHCl}_3$ );  $^1\text{H NMR}$  (600 MHz,  $\text{CDCl}_3$ )  $\delta$  7.33 (d,  $J = 6.0$  Hz, 2H), 7.30 – 7.26 (m, 2H), 7.21 (t,  $J = 6.0$  Hz, 1H), 6.48 (d,  $J = 18.0$  Hz, 1H), 6.14 – 6.09 (m, 1H), 2.67 (dd,  $J = 12.0, 6.0$  Hz, 1H), 2.37 (dd,  $J = 12.0, 6.0$  Hz, 1H), 1.77 – 1.72 (m, 1H), 1.63 (s, 2H), 1.56 – 1.51 (m, 1H), 1.47 (s, 9H), 1.44 – 1.37 (m, 1H), 1.25 – 1.19 (m, 1H), 0.93 (t,  $J = 6.0$  Hz, 3H);  $^{13}\text{C NMR}$  (151 MHz,  $\text{CDCl}_3$ )  $\delta$  175.96, 137.25, 134.00, 128.50, 127.28, 126.16, 124.66, 80.97, 61.23, 43.75, 42.49, 28.09, 17.21, 14.44; **HRMS(ESI)**  $m/z$ :  $[\text{M}+\text{H}]^+$  Calculated for  $\text{C}_{18}\text{H}_{27}\text{NO}_2^+$  290.2115; found 290.2117.

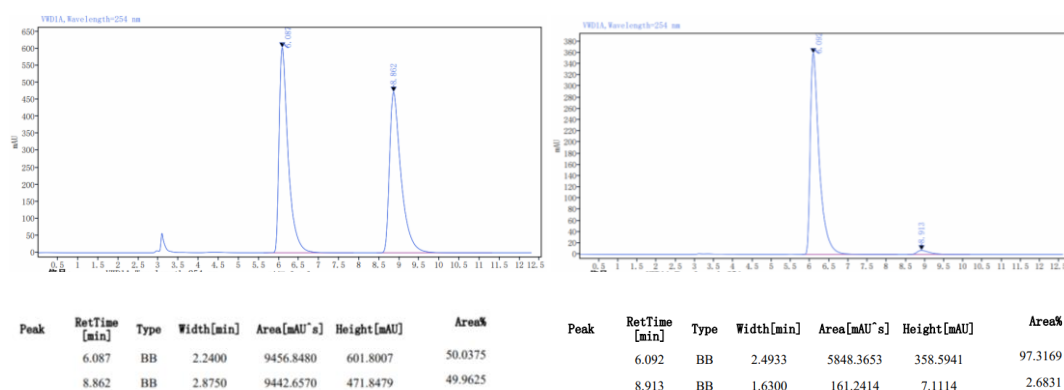

***tert*-Butyl (*S*, *E*)-2-amino-2-cinnamylhexanoate (**6n**)<sup>[3]</sup>:**

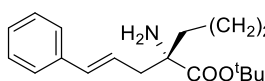

Colorless oil (41.5 mg, 68%);  $R_f = 0.72$  (petroleum ether/ ethyl acetate = 3:1); the enantiomeric excess was determined to be 94% by HPLC

analysis on Daicel Chirapak AD-H column (hexane/isopropanol = 90/10, flow rate 1.0 mL/min,  $T = 30\text{ }^\circ\text{C}$ ), UV 254 nm,  $t_R(\text{major})$  5.058 min,  $t_R(\text{minor})$  7.039 min;  $[\alpha]_D^{20} = -13.35$  ( $c = 0.69$ ,  $\text{CHCl}_3$ );

**<sup>1</sup>H NMR (600 MHz, CDCl<sub>3</sub>)** δ 7.33 (d, *J* = 6.0 Hz, 2H), 7.30 – 7.26 (m, 2H), 7.21 (t, *J* = 9.0 Hz, 1H), 6.48 (d, *J* = 12.0 Hz, 1H), 6.14 – 6.09 (m, 1H), 2.67 (dd, *J* = 12.0, 6.0 Hz, 1H), 2.37 (dd, *J* = 12.0, 6.0 Hz, 1H), 1.80 – 1.75 (m, 1H), 1.67 (s, 2H), 1.58 – 1.52 (m, 1H), 1.48 (s, 9H), 1.41 – 1.29 (m, 3H), 1.18 – 1.14 (m, 1H), 0.91 (t, *J* = 6.0 Hz, 3H); **<sup>13</sup>C NMR (151 MHz, CDCl<sub>3</sub>)** δ 175.97, 137.25, 134.00, 128.49, 127.27, 126.15, 124.67, 80.94, 61.21, 43.77, 39.83, 28.09, 26.04, 22.97, 13.90.

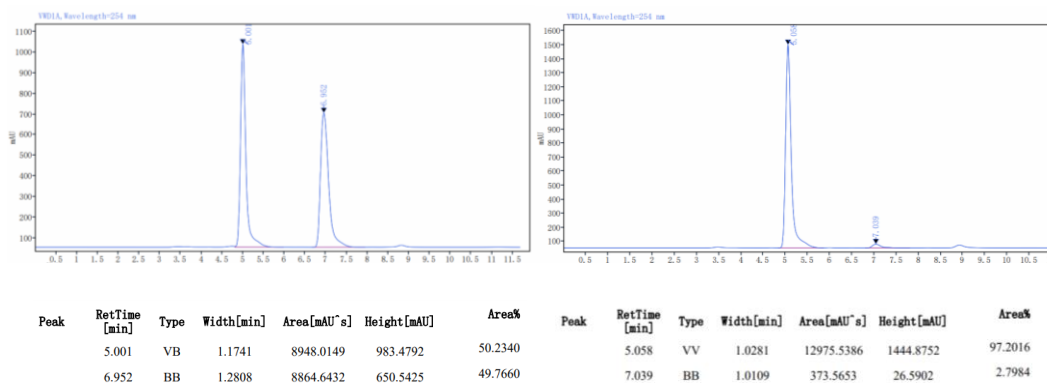

***tert*-Butyl (*S*, *E*)-2-amino-2-cinnamylheptanoate (6o):**

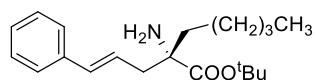

Colorless oil (28.2 mg, 43%); *R<sub>f</sub>* = 0.69 (petroleum ether/ ethyl acetate = 3:1); the enantiomeric excess was determined to be 95% by HPLC

analysis on Daicel Chirapak OD-H column (hexane/isopropanol = 90/10, flow rate 1.0 mL/min, *T* = 30 °C), UV 254 nm, *t<sub>R</sub>*(major) 6.007 min, *t<sub>R</sub>*(minor) 15.275 min; [*α*]<sub>D</sub><sup>20</sup> = -13.5 (*c* = 0.45, CHCl<sub>3</sub>);

**<sup>1</sup>H NMR (600 MHz, CDCl<sub>3</sub>)** δ 7.32 (d, *J* = 6.0 Hz, 2H), 7.29 – 7.26 (m, 2H), 7.20 (t, *J* = 6.0 Hz, 1H), 6.47 (d, *J* = 18.0 Hz, 1H), 6.14 – 6.09 (m, 1H), 2.67 (dd, *J* = 12.0, 6.0 Hz, 1H), 2.36 (dd, *J* = 12.0, 6.0 Hz, 1H), 1.78 – 1.74 (m, 1H), 1.67 (s, 2H), 1.56 – 1.51 (m, 1H), 1.47 (s, 9H), 1.42 – 1.36 (m, 1H), 1.34 – 1.26 (m, 4H), 1.23 – 1.16 (m, 1H), 0.89 (t, *J* = 6.0 Hz, 3H); **<sup>13</sup>C NMR (151 MHz, CDCl<sub>3</sub>)** δ 175.97, 137.27, 133.99, 128.48, 127.26, 126.15, 124.67, 80.94, 61.25, 43.77, 40.12, 32.09, 28.09, 23.49, 22.42, 13.89; **HRMS(ESI)** *m/z*: [M+H]<sup>+</sup> Calculated for C<sub>20</sub>H<sub>31</sub>NO<sub>2</sub><sup>+</sup> 318.2428; found 318.2424.

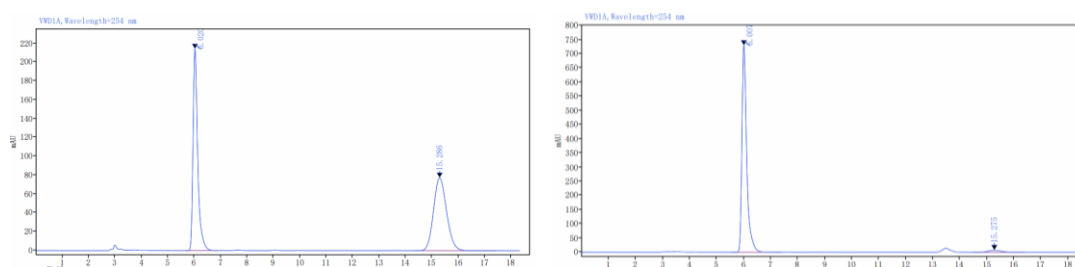

| Peak | RetTime [min] | Type | Width [min] | Area [mAU*s] | Height [mAU] | Area%   | Peak | RetTime [min] | Type | Width [min] | Area [mAU*s] | Height [mAU] | Area%   |
|------|---------------|------|-------------|--------------|--------------|---------|------|---------------|------|-------------|--------------|--------------|---------|
|      | 6.020         | BB   | 1.2500      | 2652.5662    | 214.3539     | 49.9881 |      | 6.007         | BB   | 1.8258      | 9036.1141    | 729.1401     | 97.3859 |
|      | 15.286        | BB   | 3.0767      | 2653.8247    | 77.3951      | 50.0119 |      | 15.275        | BB   | 1.9133      | 242.5510     | 7.1045       | 2.6141  |

***tert*-Butyl (*S*, *E*)-2-amino-2-cinnamyl octanoate (6p):**

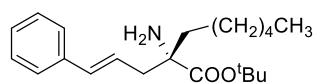

Colorless oil (34.3 mg, 50%);  $R_f = 0.64$  (petroleum ether/ ethyl acetate = 4:1); the enantiomeric excess was determined to be 94% by HPLC

analysis on Daicel Chirapak AD-H column (hexane/isopropanol = 90/10, flow rate 1.0 mL/min,  $T = 30\text{ }^\circ\text{C}$ ), UV 254 nm,  $t_R$ (major) 4.339 min,  $t_R$ (minor) 5.437 min;  $[\alpha]_D^{20} = -17.3$  ( $c = 0.21$ ,  $\text{CHCl}_3$ );  $^1\text{H NMR}$  (600 MHz,  $\text{CDCl}_3$ )  $\delta$  7.33 (d,  $J = 6.0$  Hz, 2H),  $\delta$  7.30 – 7.26 (m, 2H), 7.20 (t,  $J = 12.0$  Hz, 1H), 6.48 (d,  $J = 18.0$  Hz, 1H), 6.14 – 6.09 (m, 1H), 2.67 (dd,  $J = 12.0, 6.0$  Hz, 1H), 2.37 (dd,  $J = 12.0, 6.0$  Hz, 1H), 1.79 – 1.74 (m, 1H), 1.65 (s, 2H), 1.56 – 1.51 (m, 1H), 1.47 (s, 9H), 1.40 – 1.35 (m, 1H), 1.33 – 1.26 (m, 6H), 1.20 – 1.14 (m, 1H), 0.89 – 0.87 (m, 3H);  $^{13}\text{C NMR}$  (151 MHz,  $\text{CDCl}_3$ )  $\delta$  175.98, 137.25, 134.00, 128.49, 127.28, 126.16, 124.65, 80.95, 61.25, 43.77, 40.17, 31.63, 29.55, 28.09, 23.79, 22.50, 13.9; **HRMS(ESI)**  $m/z$ :  $[\text{M}+\text{H}]^+$  Calculated for  $\text{C}_{21}\text{H}_{33}\text{NO}_2^+$  332.2584; found 332.2583.

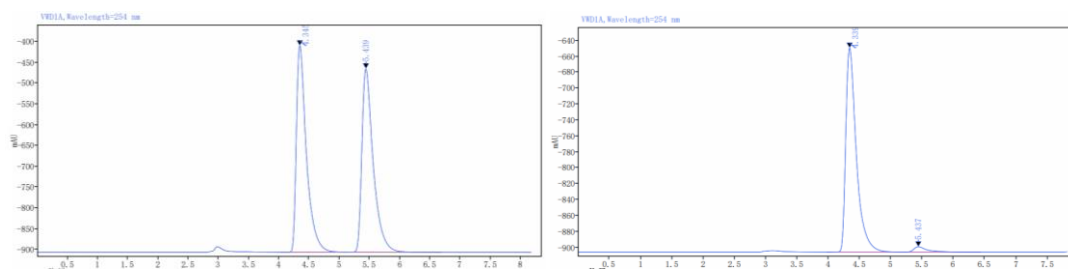

| Peak | RetTime [min] | Type | Width [min] | Area [mAU*s] | Height [mAU] | Area%   | Peak | RetTime [min] | Type | Width [min] | Area [mAU*s] | Height [mAU] | Area%   |
|------|---------------|------|-------------|--------------|--------------|---------|------|---------------|------|-------------|--------------|--------------|---------|
|      | 4.345         | BB   | 1.0662      | 5737.2919    | 496.1821     | 49.9667 |      | 4.339         | BV   | 1.2550      | 3014.6336    | 256.6383     | 96.7698 |
|      | 5.439         | BB   | 1.5905      | 5744.9416    | 440.7816     | 50.0333 |      | 5.437         | VB   | 1.2083      | 100.6278     | 6.7121       | 3.2302  |

***tert*-Butyl (*S*, *E*)-2-amino-2-isobutyl-5-phenylpent-4-enoate (6q):**

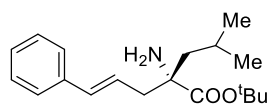

Colorless oil (26.5 mg, 44%);  $R_f = 0.69$  (petroleum ether/ ethyl acetate = 3:1); the enantiomeric excess was determined to be 97% by HPLC

analysis on Daicel Chirapak AD-H column (hexane/isopropanol = 90/10, flow rate 1.0 mL/min,  $T = 30\text{ }^\circ\text{C}$ ), UV 254 nm,  $t_R$ (major) 5.125 min,  $t_R$ (minor) 7.484 min;  $[\alpha]_D^{20} = -29.9$  ( $c = 0.38$ ,  $\text{CHCl}_3$ );  $^1\text{H NMR}$  (600 MHz,  $\text{CDCl}_3$ )  $\delta$  7.32 (d,  $J = 6.0$  Hz, 2 H), 7.30 – 7.26 (m, 2H), 7.20 (t,  $J = 9.0$  Hz, 1H), 6.47 (d,  $J = 12.0$  Hz, 1H), 6.12 – 6.06 (m, 1H), 2.66 (dd,  $J = 12.0, 6.0$  Hz, 1H), 2.34 (dd,  $J = 12.0, 6.0$  Hz, 1H), 1.80 – 1.76 (m, 2H), 1.69 (s, 2H), 1.55 – 1.52 (m, 1H), 1.48 (s, 9H), 0.97 (d,  $J = 12.0$  Hz, 3H), 0.91 (d,  $J = 6.0$  Hz, 3H);  $^{13}\text{C NMR}$  (151 MHz,  $\text{CDCl}_3$ )  $\delta$  176.43, 137.23, 134.17,

128.50, 127.29, 126.17, 124.41, 81.08, 61.02, 48.45, 45.30, 28.07, 24.65, 24.48, 23.46; HRMS(ESI)  $m/z$ :  $[M+H]^+$  Calculated for  $C_{19}H_{29}NO_2^+$  304.2271; found 304.2268.

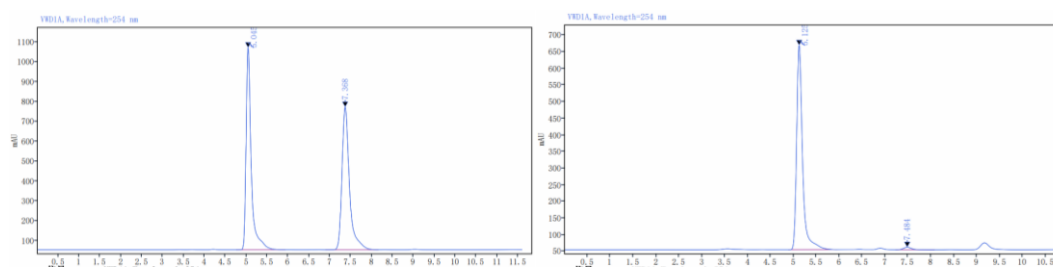

| Peak  | RetTime [min] | Type | Width [min] | Area [mAU*s] | Height [mAU] | Area%   | Peak  | RetTime [min] | Type | Width [min] | Area [mAU*s] | Height [mAU] | Area%   |
|-------|---------------|------|-------------|--------------|--------------|---------|-------|---------------|------|-------------|--------------|--------------|---------|
| 5.045 | 5.045         | BB   | 1.1800      | 8769.7709    | 1015.8075    | 49.4933 | 5.125 | 5.125         | BB   | 1.0770      | 5532.6469    | 614.6690     | 98.3530 |
| 7.368 | 7.368         | BV   | 1.2667      | 8949.3420    | 717.5975     | 50.5067 | 7.484 | 7.484         | BB   | 0.8550      | 92.6492      | 7.6602       | 1.6470  |

***tert*-Butyl (*S*, *E*)-2-allyl-2-amino-5-phenylpent-4-enoate (**6r**)** [3]:

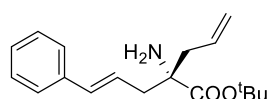

Colorless oil (27.3 mg, 48%);  $R_f = 0.53$  (petroleum ether/ ethyl acetate = 3:1); the enantiomeric excess was determined to be 96% by HPLC analysis on Daicel Chirapak AD-H column (hexane/isopropanol = 90/10, flow rate 1.0 mL/min,  $T = 30\text{ }^\circ\text{C}$ ), UV 254 nm,  $t_R$ (major) 6.067 min,  $t_R$ (minor) 8.125 min;  $[\alpha]_D^{20} = 2.63$  ( $c = 0.30$ ,  $CHCl_3$ );  $^1H$  NMR (600 MHz,  $CDCl_3$ )  $\delta$  7.33 – 7.27 (m, 4H), 7.20 (t,  $J = 9.0$  Hz, 1H), 6.49 (d,  $J = 18.0$  Hz, 1H), 6.15 – 6.10 (m, 1H), 5.78 – 5.71 (m, 1H), 5.16 (t,  $J = 10.0$  Hz, 2H), 2.68 (dd,  $J = 12.0, 6.0$  Hz, 1H), 2.59 (dd,  $J = 12.0, 6.0$  Hz, 1H), 2.38 (dd,  $J = 18.0, 12.0$  Hz, 1H), 2.28 (dd,  $J = 18.0, 12.0$  Hz, 1H), 1.71 (s, 2H), 1.47 (s, 9H);  $^{13}C$  NMR (151 MHz,  $CDCl_3$ )  $\delta$  175.33, 137.20, 134.13, 132.77, 128.50, 127.32, 126.17, 124.35, 119.22, 81.22, 60.76, 44.29, 43.58, 28.10.

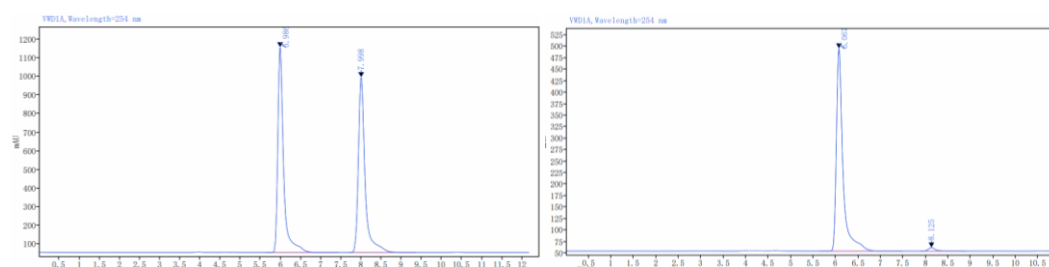

| Peak  | RetTime [min] | Type | Width [min] | Area [mAU*s] | Height [mAU] | Area%   | Peak  | RetTime [min] | Type | Width [min] | Area [mAU*s] | Height [mAU] | Area%   |
|-------|---------------|------|-------------|--------------|--------------|---------|-------|---------------|------|-------------|--------------|--------------|---------|
| 5.986 | 5.986         | VB   | 1.7938      | 11096.0710   | 1103.1560    | 50.2617 | 6.067 | 6.067         | BB   | 1.8533      | 4548.0259    | 441.3258     | 98.0326 |
| 7.998 | 7.998         | BB   | 1.6606      | 10980.5257   | 941.9023     | 49.7383 | 8.125 | 8.125         | BB   | 1.0250      | 91.2736      | 7.4355       | 1.9674  |

***tert*-Butyl (*R*, *E*)-2-amino-2-(2-(methylthio)ethyl)-5-phenylpent-4-enoate (**6s**)** [3]:

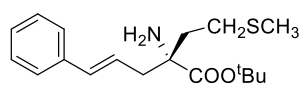

Colorless oil (33.2 mg, 52%);  $R_f = 0.53$  (petroleum ether/ ethyl acetate = 3:1); the enantiomeric excess was determined to be 92% by HPLC analysis on Daicel Chirapak AD-H column (hexane/isopropanol = 90/10, flow rate 1.0 mL/min,  $T$

= 30 °C), UV 254 nm,  $t_R$ (major) 6.475 min,  $t_R$ (minor) 9.890 min;  $[\alpha]_D^{20} = -2.73$  (c = 0.46,  $\text{CHCl}_3$ );  $^1\text{H NMR}$  (600 MHz,  $\text{CDCl}_3$ )  $\delta$  7.33 – 7.28 (m, 4H), 7.21 (t,  $J = 6.0$  Hz, 1H), 6.48 (d,  $J = 18.0$  Hz, 1H), 6.12 – 6.07 (m, 1H), 2.67 (dd,  $J = 12.0, 6.0$  Hz, 1H), 2.58 (dd,  $J = 12.0, 6.0$  Hz, 1H), 2.45 – 2.38 (m, 2H), 2.11 (s, 3H), 2.09 – 2.06 (m, 1H), 1.88 – 1.83 (m, 1H), 1.67 (s, 3H), 1.48 (s, 9H);  $^{13}\text{C NMR}$  (151 MHz,  $\text{CDCl}_3$ )  $\delta$  175.15, 137.06, 134.45, 128.53, 127.42, 126.18, 123.95, 81.46, 61.10, 43.77, 39.61, 28.86, 28.08, 15.56.

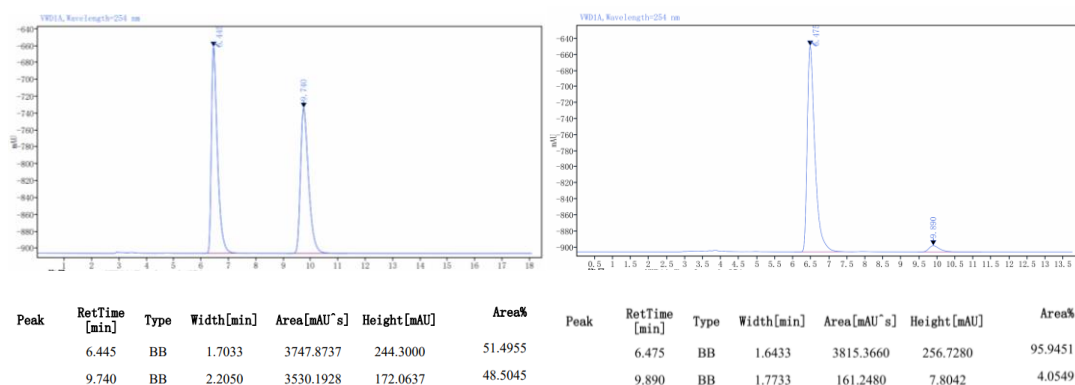

### 3.3 General procedure for the asymmetric $\alpha$ -benzylation

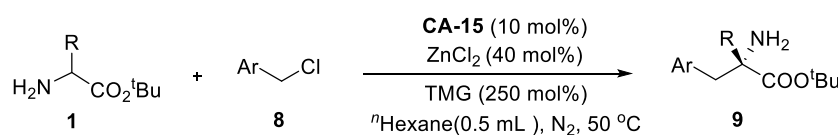

Under nitrogen atmosphere, amino acid ester **1** (0.30 mmol), benzylic chloride derivative **8** (0.20 mmol), chiral aldehyde **CA-15** (11.8 mg, 0.02 mmol),  $\text{ZnCl}_2$  (10.9 mg, 0.08 mmol), TMG (57.5 mg, 0.50 mmol) and n-hexane (0.5 ml) were added to a 10 mL vial. The mixture was continuously stirred at indicated reaction temperature under nitrogen atmosphere. After the reaction completed (detected by TLC), the solvent was removed by rotary evaporation, and the residue was purified by flash chromatography column on silica gel (eluent: petroleum ether/ ethyl acetate/ triethylamine = 300/100/4).

#### *tert*-Butyl (*S*)-2-amino-2-methyl-3-phenylpropanoate (**9a**):

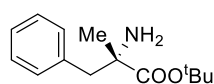

Colorless oil (33.4 mg, 71%);  $R_f = 0.6$  (petroleum ether/ ethyl acetate = 3:1); the enantiomeric excess was determined to be 90% by HPLC analysis on

Daicel Chirapak OJ-H column (hexane/isopropanol = 98/2, flow rate 0.8 mL/min, T = 30 °C), UV 220 nm,  $t_R$ (major) 6.518 min,  $t_R$ (minor) 7.736 min;  $[\alpha]_D^{25} = -12.96$  (c = 0.58,  $\text{CHCl}_3$ );  $^1\text{H NMR}$  (600 MHz,  $\text{CDCl}_3$ )  $\delta$  7.27 (t,  $J = 6.0$  Hz, 2H), 7.22 (t,  $J = 6.0$  Hz, 3H), 3.10 (d,  $J = 12.0$  Hz, 1H), 2.78

(d,  $J = 12.0$  Hz, 1H), 1.58 (s, 2H), 1.45 (s, 9H), 1.34 (s, 3H);  $^{13}\text{C}$  NMR (151 MHz,  $\text{CDCl}_3$ )  $\delta$  176.28, 136.92, 130.22, 128.12, 126.74, 81.04, 58.74, 46.50, 27.99, 26.99; HRMS(ESI)  $m/z$ :  $[\text{M}+\text{H}]^+$  Calculated for  $\text{C}_{14}\text{H}_{22}\text{NO}_2^+$  236.1645; found 236.1642.

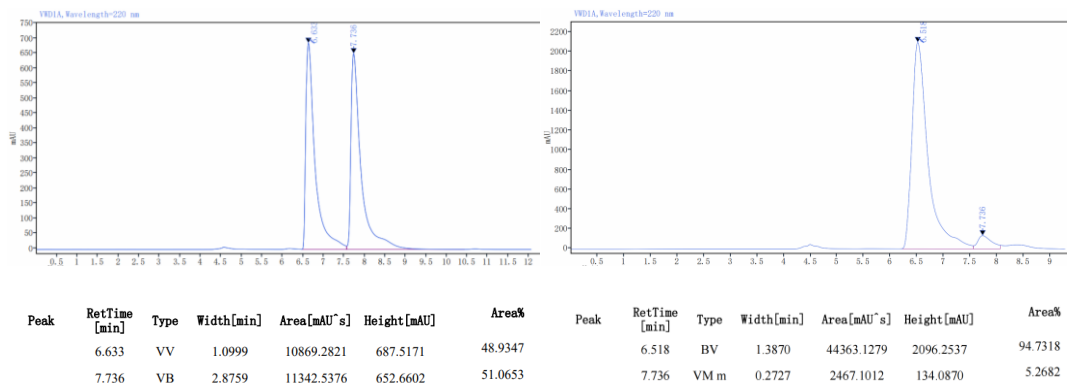

***tert*-Butyl (*S*)-2-amino-3-(2-fluorophenyl)-2-methylpropanoate (9b):**

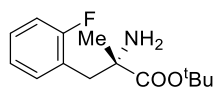

Colorless oil (35.7 mg, 66%);  $R_f = 0.49$  (petroleum ether/ ethyl acetate = 4:1);

the enantiomeric excess was determined to be 89% by HPLC analysis on

Daicel Chirapak IF column (hexane/isopropanol = 80/20, flow rate 1 mL/min,  $T = 30$  °C), UV 220

nm,  $t_R$ (major) 7.960 min,  $t_R$ (minor) 4.751 min;  $[\alpha]_D^{25} = -5.64$  ( $c = 0.39$ ,  $\text{CHCl}_3$ );  $^1\text{H}$  NMR (600

MHz,  $\text{CDCl}_3$ )  $\delta$  7.26 – 7.20 (m, 2H), 7.07 – 7.01 (m, 2H), 3.05 (d,  $J = 12.0$  Hz, 1H), 2.95 (d,  $J =$

18.0 Hz, 1H), 1.69 (s, 2H), 1.45 (s, 9H), 1.34 (s, 3H);  $^{13}\text{C}$  NMR (151 MHz,  $\text{CDCl}_3$ )  $\delta$  175.89,

162.36, 160.73, 132.54, 132.51, 128.54, 128.49, 123.97, 123.86, 123.69, 123.67, 115.38, 115.23,

81.19, 58.72, 39.11, 27.89, 26.26; HRMS(ESI)  $m/z$ :  $[\text{M}+\text{H}]^+$  Calculated for  $\text{C}_{14}\text{H}_{20}\text{FNO}_2^+$  254.1551;

found 254.1548.

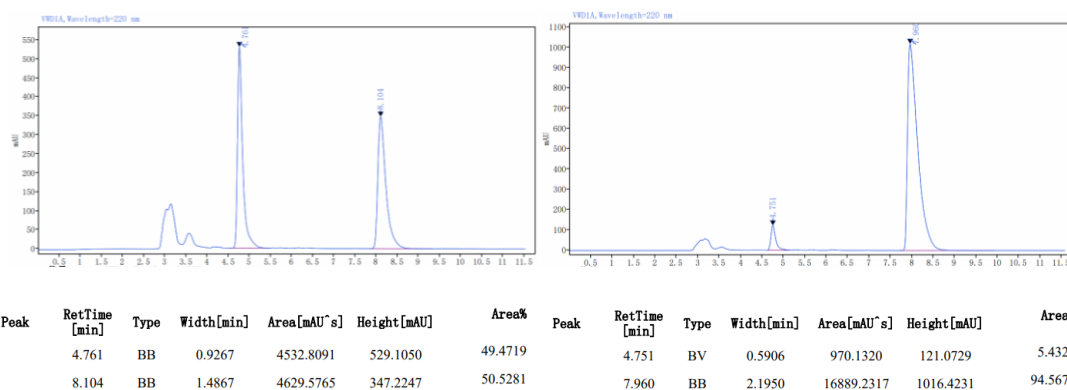

***tert*-Butyl (*S*)-2-amino-3-(2-chlorophenyl)-2-methylpropanoate (9c):**

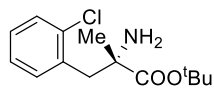

Colorless oil (29.2 mg, 54%);  $R_f = 0.56$  (petroleum ether/ ethyl acetate = 3:1);

the enantiomeric excess was determined to be 86% by HPLC analysis on

Daicel Chirapak OJ-H column (hexane/isopropanol = 99/1, flow rate 0.5 mL/min, T = 30 °C), UV 220 nm,  $t_R$ (major) 11.402 min,  $t_R$ (minor) 13.129 min;  $[\alpha]_D^{25} = -6.61$  (c = 0.22, CHCl<sub>3</sub>); <sup>1</sup>H NMR (600 MHz, CDCl<sub>3</sub>) δ 7.37 – 7.36 (m, 1H), 7.32 – 7.31 (m, 1H), 7.19 – 7.15 (m, 2H), 3.15 (t, J = 15.0 Hz, 2H), 1.70 (s, 2H), 1.47 (s, 9H), 1.34 (s, 3H); <sup>13</sup>C NMR (151 MHz, CDCl<sub>3</sub>) δ 175.98, 135.28, 135.01, 132.00, 129.69, 128.04, 126.40, 81.23, 59.30, 42.37, 27.93, 26.35; HRMS(ESI) m/z: [M+H]<sup>+</sup> Calculated for C<sub>14</sub>H<sub>20</sub>ClNO<sub>2</sub><sup>+</sup> 270.1255; found 270.1245.

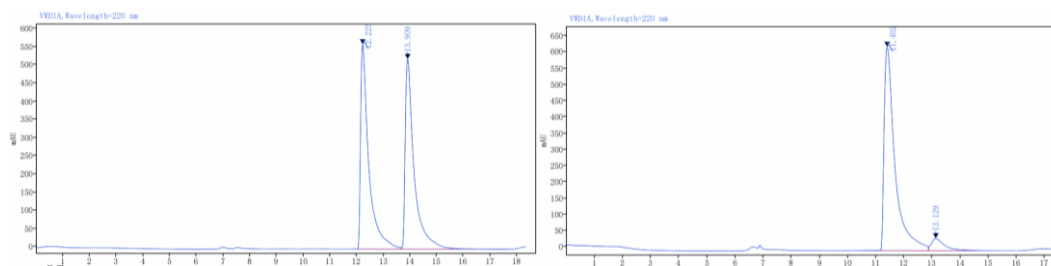

| Peak | RetTime [min] | Type | Width [min] | Area [mAU*s] | Height [mAU] | Area%   | Peak | RetTime [min] | Type | Width [min] | Area [mAU*s] | Height [mAU] | Area%   |
|------|---------------|------|-------------|--------------|--------------|---------|------|---------------|------|-------------|--------------|--------------|---------|
|      | 12.225        | BV   | 2.3894      | 12018.9446   | 562.4213     | 49.7574 |      | 11.402        | BV   | 2.3545      | 16751.2423   | 626.6725     | 93.1098 |
|      | 13.909        | VB   | 3.9439      | 12136.1293   | 521.9907     | 50.2426 |      | 13.129        | VB   | 2.7155      | 1239.6045    | 37.5010      | 6.8902  |

**tert-Butyl (S)-2-amino-2-methyl-3-(o-tolyl)propanoate (9d)** [7]:

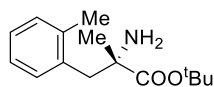

Colorless oil (29.9 mg, 60%);  $R_f = 0.56$  (petroleum ether/ ethyl acetate = 3:1);

the enantiomeric excess was determined to be 89% by HPLC analysis on

Daicel Chirapak IC column (hexane/isopropanol = 80/20, flow rate 1 mL/min, T = 30 °C), UV 220 nm,  $t_R$ (major) 5.676 min,  $t_R$ (minor) 4.972 min;  $[\alpha]_D^{25} = -8.66$  (c = 0.46, CHCl<sub>3</sub>); <sup>1</sup>H NMR (600 MHz, CDCl<sub>3</sub>) δ 7.19 (d, J = 12.0 Hz, 1H), 7.15 (d, J = 6.0 Hz, 1H), 7.13 – 7.08 (m, 2H), 3.06 (d, J = 12.0 Hz, 1H), 2.94 (d, J = 12.0 Hz, 1H), 2.37 (s, 3H), 1.54 (s, 2H), 1.46 (s, 9H), 1.34 (s, 3H); <sup>13</sup>C NMR (151 MHz, CDCl<sub>3</sub>) δ 176.72, 137.47, 135.47, 130.49, 130.39, 126.65, 125.56, 81.02, 59.43, 42.19, 27.94, 27.04, 20.36.

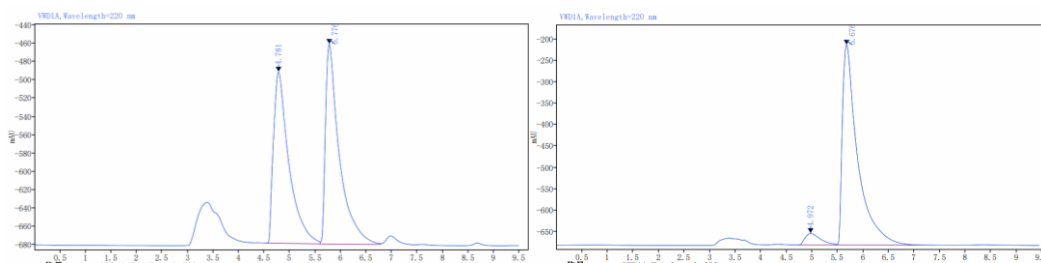

| Peak | RetTime [min] | Type | Width [min] | Area [mAU*s] | Height [mAU] | Area%   | Peak | RetTime [min] | Type | Width [min] | Area [mAU*s] | Height [mAU] | Area%   |
|------|---------------|------|-------------|--------------|--------------|---------|------|---------------|------|-------------|--------------|--------------|---------|
|      | 4.781         | BV   | 1.0398      | 3934.9869    | 187.3900     | 48.8432 |      | 4.972         | BV   | 0.7643      | 560.2734     | 27.1176      | 5.4416  |
|      | 5.776         | VV   | 1.1817      | 4121.3865    | 218.4706     | 51.1568 |      | 5.676         | VB   | 1.7507      | 9735.8266    | 466.9107     | 94.5584 |

***tert*-Butyl (*S*)-2-amino-3-(3-fluorophenyl)-2-methylpropanoate (**9e**):**

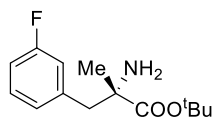

Colorless oil (31.8 mg, 63%);  $R_f = 0.44$  (petroleum ether/ ethyl acetate = 3:1); the enantiomeric excess was determined to be 86% by HPLC analysis on Daicel Chirapak IF column (hexane/isopropanol = 80/20, flow rate 1 mL/min,  $T = 30\text{ }^\circ\text{C}$ ), UV 220 nm,  $t_R(\text{major})$  5.550 min,  $t_R(\text{minor})$  4.346 min;  $[\alpha]_D^{25} = -7.41$  ( $c = 0.38$ ,  $\text{CHCl}_3$ );  $^1\text{H NMR}$  (600 MHz,  $\text{CDCl}_3$ )  $\delta$  7.27 – 7.21 (m, 1H), 7.01 (d,  $J = 6.0$  Hz, 1H), 6.96 – 6.92 (m, 2H), 3.09 (d,  $J = 12.0$  Hz, 1H), 2.78 (d,  $J = 18.0$  Hz, 1H), 1.70 (s, 2H), 1.46 (s, 9H), 1.35 (s, 3H);  $^{13}\text{C NMR}$  (151 MHz,  $\text{CDCl}_3$ )  $\delta$  175.93, 163.45, 161.83, 139.44, 139.39, 129.53, 129.48, 125.91, 125.89, 117.13, 113.74, 113.60, 81.37, 58.77, 46.10, 27.97, 26.91; **HRMS(ESI)**  $m/z$ :  $[\text{M}+\text{H}]^+$  Calculated for  $\text{C}_{14}\text{H}_{20}\text{FNO}_2\text{H}^+$  254.1551; found 254.1547.

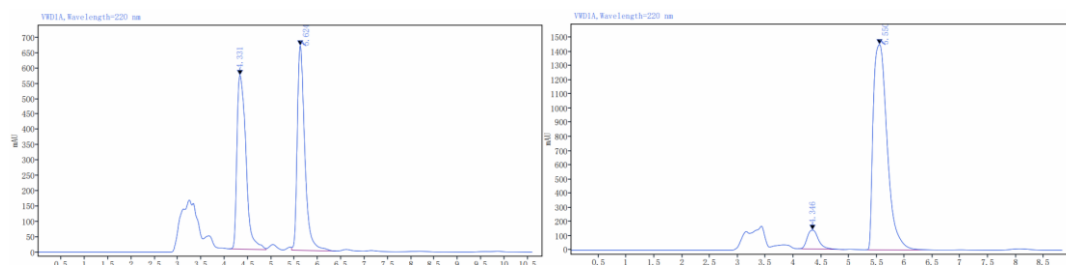

| Peak | RetTime [min] | Type | Width [min] | Area [mAU*s] | Height [mAU] | Area%   | Peak | RetTime [min] | Type | Width [min] | Area [mAU*s] | Height [mAU] | Area%   |
|------|---------------|------|-------------|--------------|--------------|---------|------|---------------|------|-------------|--------------|--------------|---------|
|      | 4.331         | BV   | 0.7990      | 7587.2897    | 566.1825     | 50.3201 |      | 4.346         | BB   | 0.8273      | 1871.3379    | 132.6176     | 6.9183  |
|      | 5.624         | VB   | 0.9472      | 7490.7598    | 666.7213     | 49.6799 |      | 5.550         | BB   | 1.2926      | 25177.5916   | 1446.0737    | 93.0817 |

***tert*-Butyl (*S*)-2-amino-3-(3-chlorophenyl)-2-methylpropanoate (**9f**):**

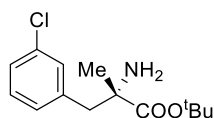

Colorless oil (40.1 mg, 74%);  $R_f = 0.56$  (petroleum ether/ ethyl acetate = 3:1); the enantiomeric excess was determined to be 94% by HPLC analysis on Daicel Chirapak IF column (hexane/isopropanol = 70/30, flow rate 1 mL/min,  $T = 30\text{ }^\circ\text{C}$ ), UV 220 nm,  $t_R(\text{major})$  4.793 min,  $t_R(\text{minor})$  4.096 min;  $[\alpha]_D^{25} = -6.61$  ( $c = 0.22$ ,  $\text{CHCl}_3$ );  $^1\text{H NMR}$  (600 MHz,  $\text{CDCl}_3$ )  $\delta$  7.26 – 7.19 (m, 3H), 7.12 (d,  $J = 6.0$  Hz, 1H), 3.07 (d,  $J = 12.0$  Hz, 1H), 2.75 (d,  $J = 18.0$  Hz, 1H), 1.58 (s, 2H), 1.46 (s, 9H), 1.34 (s, 3H);  $^{13}\text{C NMR}$  (151 MHz,  $\text{CDCl}_3$ )  $\delta$  175.98, 139.02, 133.98, 130.26, 129.32, 128.38, 126.94, 81.38, 58.74, 46.10, 27.98, 26.98; **HRMS(ESI)**  $m/z$ :  $[\text{M}+\text{H}]^+$  Calculated for  $\text{C}_{14}\text{H}_{20}\text{ClNO}_2^+$  270.1255; found 270.1256.



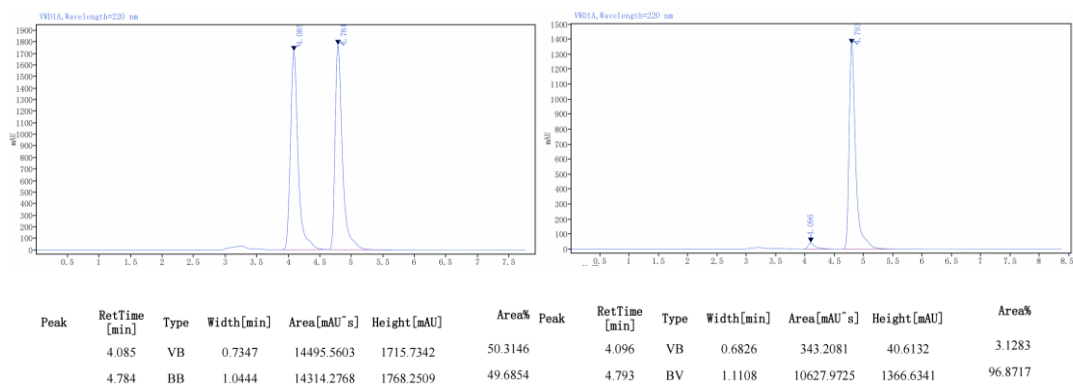

***tert*-Butyl (*S*)-2-amino-2-methyl-3-(*m*-tolyl)propanoate (**9g**):**

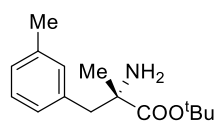

Colorless oil (39.8 mg, 80%);  $R_f = 0.49$  (petroleum ether/ ethyl acetate = 4:1);

the enantiomeric excess was determined to be 94% by HPLC analysis on Daicel Chirapak IF column (hexane/isopropanol = 70/30, flow rate 1 mL/min,  $T = 30\text{ }^\circ\text{C}$ ), UV 220 nm,  $t_R(\text{major})$  5.279 min,  $t_R(\text{minor})$  3.948 min;  $[\alpha]_D^{25} = -7.56$  ( $c = 0.52$ ,  $\text{CHCl}_3$ );  **$^1\text{H NMR}$  (600 MHz,  $\text{CDCl}_3$ )**  $\delta$  7.16 (t,  $J = 6.0$  Hz, 1H), 7.04 – 7.01 (m, 3H), 3.09 (d,  $J = 18.0$  Hz, 1H), 2.73 (d,  $J = 12.0$  Hz, 1H), 2.31 (s, 3H), 1.71 (s, 2H), 1.46 (s, 9H), 1.35 (s, 3H);  **$^{13}\text{C NMR}$  (151 MHz,  $\text{CDCl}_3$ )**  $\delta$  176.26, 137.65, 136.74, 130.95, 128.05, 127.51, 127.21, 81.06, 58.79, 46.36, 28.00, 27.05, 21.29; **HRMS(ESI)  $m/z$ :  $[\text{M}+\text{H}]^+$**  Calculated for  $\text{C}_{15}\text{H}_{23}\text{NO}_2^+$  250.1802; found 250.1796.

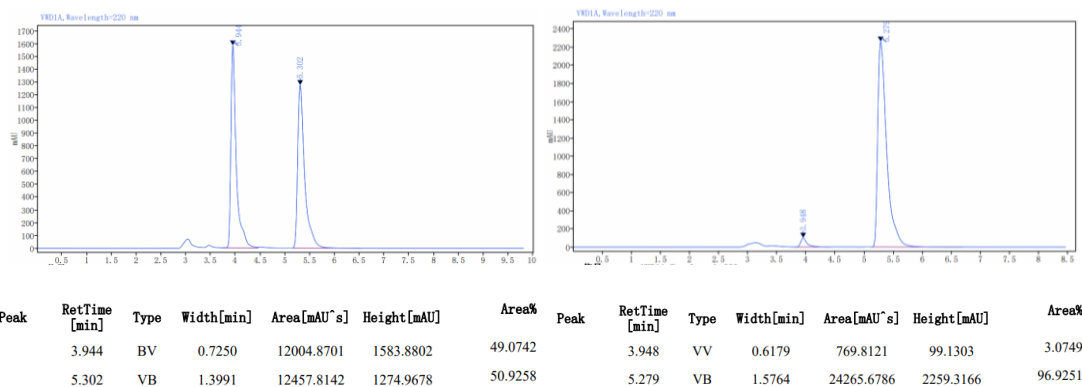

***tert*-Butyl (*S*)-2-amino-3-(4-fluorophenyl)-2-methylpropanoate (**9h**)<sup>[7]</sup>:**

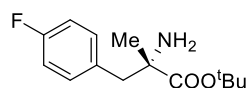

Colorless oil (29.4 mg, 58%);  $R_f = 0.39$  (petroleum ether/ ethyl acetate = 2:1); the enantiomeric excess was determined to be 94% by HPLC analysis

on Daicel Chirapak IC column (hexane/isopropanol = 95/5, flow rate 1 mL/min,  $T = 30\text{ }^\circ\text{C}$ ), UV 220 nm,  $t_R(\text{major})$  9.483 min,  $t_R(\text{minor})$  8.270 min;  $[\alpha]_D^{25} = -5.52$  ( $c = 0.72$ ,  $\text{CHCl}_3$ );  **$^1\text{H NMR}$  (600 MHz,  $\text{CDCl}_3$ )**  $\delta$  7.19 (t,  $J = 6.0$  Hz, 2H), 6.96 (t,  $J = 9.0$  Hz, 1H), 3.07 (d,  $J = 12.0$  Hz, 1H), 2.75 (d,  $J = 18.0$  Hz, 1H), 1.71 (s, 2H), 1.45 (s, 9H), 1.34 (s, 3H);  **$^{13}\text{C NMR}$  (151 MHz,  $\text{CDCl}_3$ )**  $\delta$  176.15,

162.78, 161.15, 132.64, 132.62, 131.66, 131.61, 114.97, 114.83, 81.17, 58.71, 45.58, 27.98, 26.85.

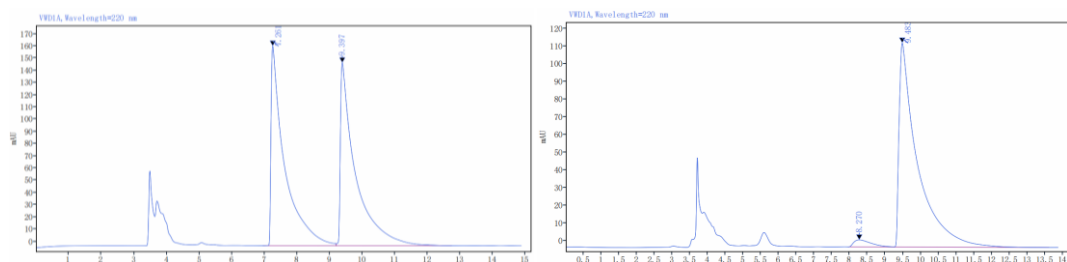

| Peak | RetTime [min] | Type | Width[min] | Area[mAU*s] | Height[mAU] | Area%   | Peak | RetTime [min] | Type | Width[min] | Area[mAU*s] | Height[mAU] | Area%   |
|------|---------------|------|------------|-------------|-------------|---------|------|---------------|------|------------|-------------|-------------|---------|
|      | 7.261         | BV   | 2.2536     | 4687.8381   | 163.5356    | 49.6319 |      | 8.270         | BV   | 1.3019     | 135.0608    | 3.9660      | 3.1622  |
|      | 9.397         | VB   | 3.5497     | 4757.3708   | 149.8298    | 50.3681 |      | 9.483         | VB   | 4.3647     | 4136.0261   | 115.2528    | 96.8378 |

***tert*-Butyl (*S*)-2-amino-2-methyl-3-(*p*-tolyl)propanoate (**8i**)** [7]:

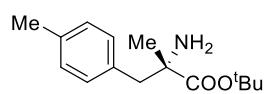

Colorless oil (37.4 mg, 75%);  $R_f = 0.53$  (petroleum ether/ ethyl acetate = 3:1); The enantiomeric excess was determined to be 89% by HPLC

analysis on Daicel Chirapak IC column (hexane/isopropanol = 90/10, flow rate 1.0 mL/min,  $T = 30$  °C), UV 220 nm,  $t_{R(\text{major})} 14.995$  min,  $t_{R(\text{minor})} 8.045$  min;  $[\alpha]_D^{25} = -16.58$  ( $c = 0.71$ ,  $\text{CHCl}_3$ );  $^1\text{H}$  NMR (600 MHz,  $\text{CDCl}_3$ )  $\delta$  7.11 – 7.07 (m, 4H), 3.07 (d,  $J = 18.0$  Hz, 1H), 2.73 (d,  $J = 12.0$  Hz, 1H), 2.31 (s, 3H), 1.58 (s, 2H), 1.46 (s, 9H), 1.33 (s, 3H);  $^{13}\text{C}$  NMR (151 MHz,  $\text{CDCl}_3$ )  $\delta$  176.39, 136.26, 133.74, 130.07, 128.84, 80.99, 58.75, 46.01, 28.01, 26.95, 20.97.

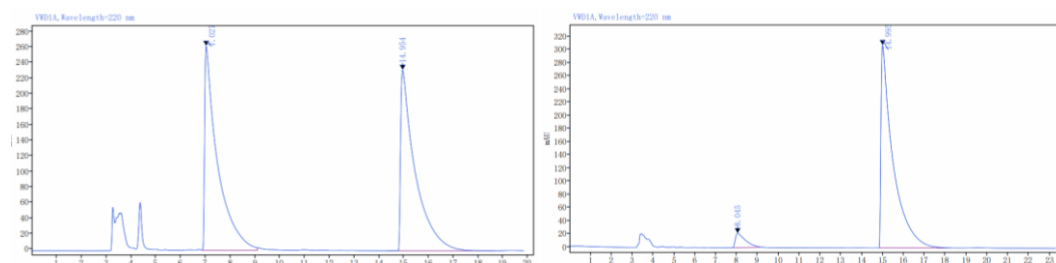

| Peak | RetTime [min] | Type | Width[min] | Area[mAU*s] | Height[mAU] | Area%   | Peak | RetTime [min] | Type | Width[min] | Area[mAU*s] | Height[mAU] | Area%   |
|------|---------------|------|------------|-------------|-------------|---------|------|---------------|------|------------|-------------|-------------|---------|
|      | 7.027         | VV   | 2.2218     | 9384.6007   | 262.8221    | 49.9048 |      | 8.045         | BM m | 0.4762     | 716.1154    | 21.5191     | 5.5378  |
|      | 14.954        | BB   | 4.3300     | 9420.3931   | 232.5488    | 50.0952 |      | 14.995        | BB   | 4.1167     | 12215.2237  | 307.9258    | 94.4622 |

***tert*-Butyl (*S*)-2-amino-3-(4-(*tert*-butyl)phenyl)-2-methylpropanoate (**8j**)** [7]:

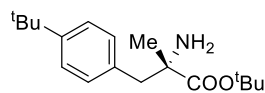

Colorless oil (34.4 mg, 59%);  $R_f = 0.21$  (petroleum ether/ ethyl acetate = 4:1); the enantiomeric excess was determined to be 79% by HPLC

analysis on Daicel Chirapak IF column (hexane/isopropanol = 99/1, flow rate 1.0 mL/min,  $T = 30$  °C), UV 220 nm,  $t_{R(\text{major})} 15.570$  min,  $t_{R(\text{minor})} 13.528$  min;  $[\alpha]_D^{25} = -9.03$  ( $c = 0.74$ ,  $\text{CHCl}_3$ );  $^1\text{H}$  NMR (600 MHz,  $\text{CDCl}_3$ )  $\delta$  7.28 (t,  $J = 12.0$  Hz, 2H),  $\delta$  7.15 (d,  $J = 6.0$  Hz, 2H), 3.08 (d,  $J = 12.0$  Hz, 1H), 2.75 (d,  $J = 12.0$  Hz, 1H), 1.70 (s, 2H), 1.46 (s, 9H), 1.35 (s, 3H), 1.30 (s, 9H);  $^{13}\text{C}$  NMR (151 MHz,  $\text{CDCl}_3$ )  $\delta$  176.27, 149.62, 133.65, 129.89, 125.07, 81.09, 58.83, 45.84, 34.38, 31.34,

28.00, 26.89.

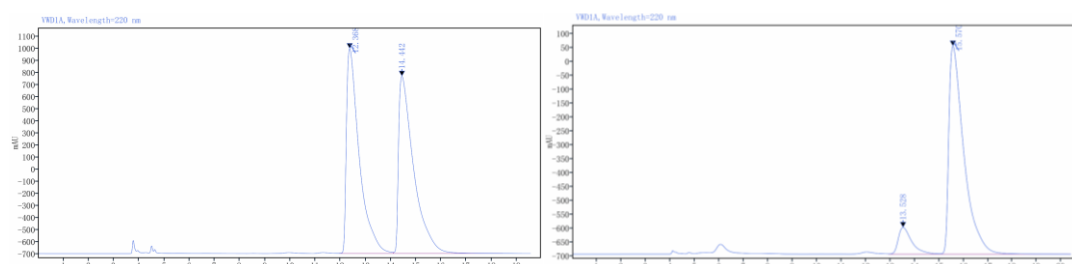

| Peak | RetTime [min] | Type | Width [min] | Area [mAU*s] | Height [mAU] | Area%   | Peak | RetTime [min] | Type | Width [min] | Area [mAU*s] | Height [mAU] | Area%   |
|------|---------------|------|-------------|--------------|--------------|---------|------|---------------|------|-------------|--------------|--------------|---------|
|      | 12.368        | VV   | 2.1499      | 59978.9262   | 1693.5624    | 49.6117 |      | 13.528        | VV   | 2.1040      | 3682.9793    | 95.9689      | 10.2951 |
|      | 14.442        | VB   | 4.3390      | 60917.9114   | 1465.0577    | 50.3883 |      | 15.570        | VBA  | 5.3567      | 32091.1282   | 749.0466     | 89.7049 |

***tert*-Butyl (*S*)-3-methyl-1-oxo-1,2,3,4-tetrahydroisoquinoline-3-carboxylate (9k):**

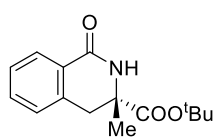

Colorless oil (27.2 mg, 52%);  $R_f = 0.52$  (petroleum ether/ ethyl acetate = 3:2);

the enantiomeric excess was determined to be 92% by HPLC analysis on

Daicel Chirapak IF column (hexane/isopropanol = 70/30, flow rate 1.0

mL/min,  $T = 30\text{ }^\circ\text{C}$ ), UV 220 nm,  $t_R(\text{major})$  8.237 min,  $t_R(\text{minor})$  9.619 min;  $[\alpha]_D^{25} = 6.55$  ( $c = 0.39$ ,

$\text{CHCl}_3$ );  $^1\text{H NMR}$  (600 MHz,  $\text{CDCl}_3$ )  $\delta$  8.06 (d,  $J = 12.0$  Hz, 1H), 7.45 (t,  $J = 6.0$  Hz, 1H), 7.35 (t,

$J = 9.0$  Hz, 1H), 7.21 (d,  $J = 12.0$  Hz, 1H), 3.32 (d,  $J = 12.0$  Hz, 1H), 3.06 (d,  $J = 18.0$  Hz, 1H), 1.71

(s, 1H), 1.49 (s, 3H), 1.37 (s, 9H);  $^{13}\text{C NMR}$  (151 MHz,  $\text{CDCl}_3$ )  $\delta$  172.36, 165.34, 136.13, 132.41,

128.00, 127.71, 127.34, 82.61, 58.93, 37.98, 27.73, 25.33; **HRMS(ESI)**  $m/z$ :  $[\text{M}+\text{Na}]^+$  Calculated

for  $\text{C}_{15}\text{H}_{19}\text{NO}_3\text{Na}^+$  284.1257; found 284.1252.

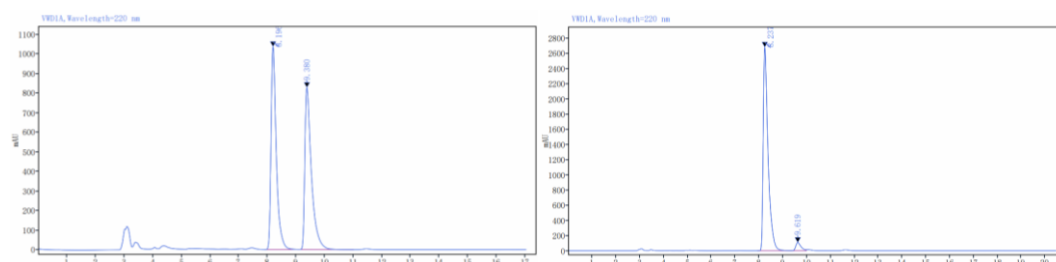

| Peak | RetTime [min] | Type | Width [min] | Area [mAU*s] | Height [mAU] | Area%   | Peak | RetTime [min] | Type | Width [min] | Area [mAU*s] | Height [mAU] | Area%   |
|------|---------------|------|-------------|--------------|--------------|---------|------|---------------|------|-------------|--------------|--------------|---------|
|      | 8.196         | BB   | 1.1919      | 13211.2842   | 1034.7351    | 49.9447 |      | 8.237         | BV   | 1.4215      | 37900.0085   | 2680.4135    | 95.8424 |
|      | 9.380         | BB   | 1.9115      | 13240.5150   | 826.0238     | 50.0553 |      | 9.619         | VV   | 0.6402      | 1644.0963    | 106.2072     | 4.1576  |

***tert*-Butyl (*S*)-2-amino-2-benzylbutanoate (9l) [7]:**

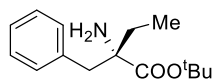

Colorless oil (22.9 mg, 46%);  $R_f = 0.42$  (petroleum ether/ ethyl acetate = 3:1);

the enantiomeric excess was determined to be 84% by HPLC analysis on

Daicel Chirapak IC column (hexane/isopropanol = 90/10, flow rate 1.0 mL/min,  $T = 30\text{ }^\circ\text{C}$ ), UV

220 nm,  $t_R(\text{major})$  11.278 min,  $t_R(\text{minor})$  5.475 min;  $[\alpha]_D^{25} = -15.43$  ( $c = 0.32$ ,  $\text{CHCl}_3$ );  $^1\text{H NMR}$

(600 MHz, CDCl<sub>3</sub>) δ 7.27 (t, *J* = 6.0 Hz, 2H), 7.22 (t, *J* = 6.0 Hz, 3H), 3.16 (d, *J* = 18.0 Hz, 1H), 2.74 (d, *J* = 12.0 Hz, 1H), 1.94 – 1.88 (m, 1H), 1.59 (s, 2H), 1.57 – 1.55 (m, 1H), 1.46 (s, 9H), 0.91 (t, *J* = 6.0 Hz, 3H); <sup>13</sup>C NMR (151 MHz, CDCl<sub>3</sub>) δ 175.62, 136.81, 130.23, 128.17, 126.76, 81.18, 62.28, 45.55, 33.58, 28.07, 8.16.

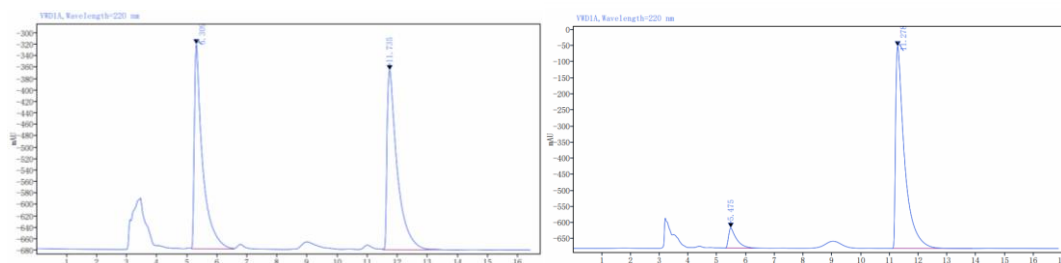

| Peak | RetTime [min] | Type | Width [min] | Area [mAU*s] | Height [mAU] | Area%   | Peak | RetTime [min] | Type | Width [min] | Area [mAU*s] | Height [mAU] | Area%   |
|------|---------------|------|-------------|--------------|--------------|---------|------|---------------|------|-------------|--------------|--------------|---------|
|      | 5.309         | VV   | 1.4225      | 6760.7503    | 356.9086     | 48.0063 |      | 5.475         | BB   | 1.5967      | 1188.7560    | 62.3062      | 8.0367  |
|      | 11.735        | VB   | 2.5568      | 7322.2900    | 313.1000     | 51.9937 |      | 11.278        | BB   | 2.7900      | 13602.8999   | 627.1181     | 91.9633 |

***tert*-Butyl (*S*)-2-amino-2-benzylpentanoate (9m):**

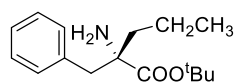

Colorless oil (23.2 mg, 44%); *R*<sub>f</sub> = 0.36 (petroleum ether/ ethyl acetate = 3:1); the enantiomeric excess was determined to be 83% by HPLC analysis on

Daicel Chirapak IC column (hexane/isopropanol = 90/10, flow rate 1.0 mL/min, T = 30 °C), UV 220 nm, *t*<sub>R</sub>(major) 14.237 min, *t*<sub>R</sub>(minor) 5.041 min; [α]<sub>D</sub><sup>25</sup> = -14.84 (c = 0.38, CHCl<sub>3</sub>); <sup>1</sup>H NMR (600 MHz, CDCl<sub>3</sub>) δ 7.28 – 7.25 (m, 2H), 7.22 (t, *J* = 6.0 Hz, 3H), 3.15 (d, *J* = 12.0 Hz, 1H), 2.73 (d, *J* = 12.0 Hz, 1H), 1.86 – 1.81 (m, 1H), 1.58 (s, 2H), 1.56 – 1.51 (m, 1H), 1.45 (s, 9H), 1.42 – 1.39 (m, 1H), 1.23 – 1.20 (m, 1H), 0.94 (t, *J* = 6.0 Hz, 3H); <sup>13</sup>C NMR (151 MHz, CDCl<sub>3</sub>) δ 175.77, 136.76, 130.24, 128.16, 126.76, 81.15, 61.98, 45.85, 43.17, 28.07, 17.24, 14.43; HRMS(ESI) *m/z*: [M+H]<sup>+</sup> Calculated for C<sub>16</sub>H<sub>25</sub>NO<sub>2</sub><sup>+</sup> 264.1958; found 264.1953.

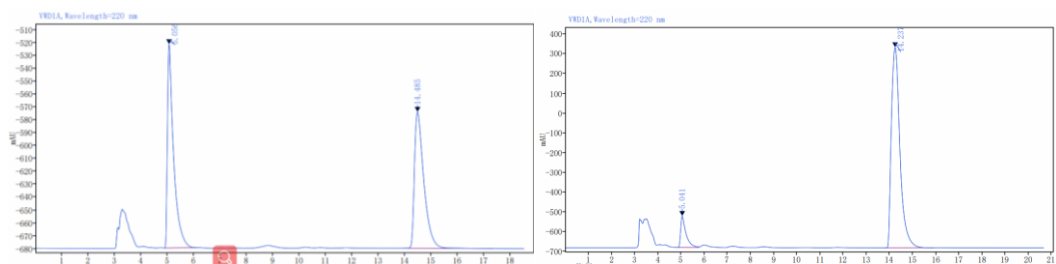

| Peak | RetTime [min] | Type | Width [min] | Area [mAU*s] | Height [mAU] | Area%   | Peak | RetTime [min] | Type | Width [min] | Area [mAU*s] | Height [mAU] | Area%   |
|------|---------------|------|-------------|--------------|--------------|---------|------|---------------|------|-------------|--------------|--------------|---------|
|      | 5.056         | BB   | 1.2167      | 2566.6487    | 158.0930     | 49.5010 |      | 5.041         | BV   | 0.9062      | 2486.1057    | 157.6024     | 8.7021  |
|      | 14.485        | BB   | 3.3833      | 2618.3987    | 105.7623     | 50.4990 |      | 14.237        | BB   | 2.1033      | 26082.8104   | 1013.4075    | 91.2979 |

***tert*-Butyl (*S*)-2-amino-2-benzylhexanoate (**9n**):**

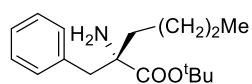

Colorless oil (22.7 mg, 41%);  $R_f = 0.5$  (petroleum ether/ ethyl acetate = 3:1); the enantiomeric excess was determined to be 89% by HPLC analysis on

Daicel Chirapak IC column (hexane/isopropanol = 90/10, flow rate 1.0 mL/min,  $T = 30\text{ }^\circ\text{C}$ ), UV 220 nm,  $t_R(\text{major})$  13.736 min,  $t_R(\text{minor})$  5.059 min;  $[\alpha]_D^{25} = -12.36$  ( $c = 0.30$ ,  $\text{CHCl}_3$ );  $^1\text{H NMR}$  (600 MHz,  $\text{CDCl}_3$ )  $\delta$  7.28 – 7.25 (m, 2H), 7.22 (t,  $J = 6.0$  Hz, 3H), 3.15 (d,  $J = 12.0$  Hz, 1H), 2.74 (d,  $J = 18.0$  Hz, 1H), 1.88 – 1.83 (m, 1H), 1.58 (s, 2H), 1.55 – 1.52 (m, 1H), 1.46 (s, 9H), 1.41 – 1.29 (m, 3H), 1.19 – 1.12 (m, 1H), 0.91 (t,  $J = 6.0$  Hz, 3H);  $^{13}\text{C NMR}$  (151 MHz,  $\text{CDCl}_3$ )  $\delta$  175.79, 136.78, 130.23, 128.16, 126.75, 81.13, 61.96, 45.89, 40.54, 28.08, 26.05, 23.00, 13.89; **HRMS(ESI)**  $m/z$ :  $[\text{M}+\text{H}]^+$  Calculated for  $\text{C}_{17}\text{H}_{27}\text{NO}_2^+$  278.2115; found 278.2113.

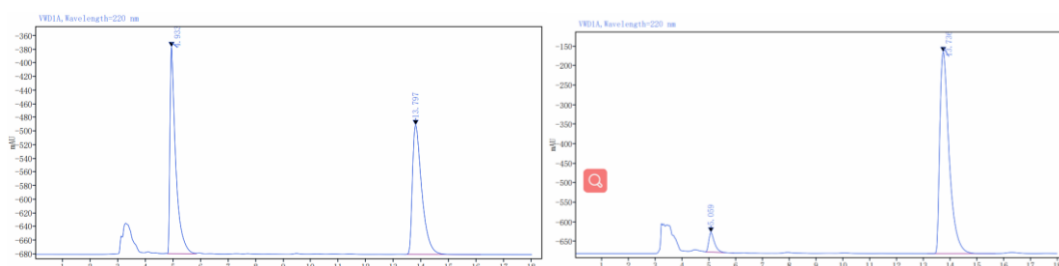

| Peak | RetTime [min] | Type | Width [min] | Area [mAU*s] | Height [mAU] | Area%   | Peak | RetTime [min] | Type | Width [min] | Area [mAU*s] | Height [mAU] | Area%   |
|------|---------------|------|-------------|--------------|--------------|---------|------|---------------|------|-------------|--------------|--------------|---------|
|      | 4.933         | VV   | 1.0589      | 4388.7260    | 302.4166     | 49.4426 |      | 5.059         | VB   | 1.0662      | 748.8926     | 50.0759      | 5.6477  |
|      | 13.797        | BB   | 2.7567      | 4487.6723    | 189.1713     | 50.5574 |      | 13.736        | BB   | 2.5517      | 12511.1642   | 515.8001     | 94.3523 |

***tert*-Butyl (*S*)-2-amino-2-benzylheptanoate (**9o**):**

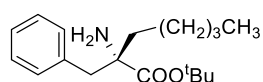

Colorless oil (26.8 mg, 46%);  $R_f = 0.75$  (petroleum ether/ ethyl acetate = 3:1); the enantiomeric excess was determined to be 85% by HPLC analysis on

Daicel Chirapak IC column (hexane/isopropanol = 90/10, flow rate 1.0 mL/min,  $T = 30\text{ }^\circ\text{C}$ ), UV 220 nm,  $t_R(\text{major})$  13.151 min,  $t_R(\text{minor})$  5.004 min;  $[\alpha]_D^{25} = -10.13$  ( $c = 0.46$ ,  $\text{CHCl}_3$ );  $^1\text{H NMR}$  (600 MHz,  $\text{CDCl}_3$ )  $\delta$  7.28 – 7.25 (m, 2H), 7.22 (d,  $J = 6.0$  Hz, 3H), 3.15 (d,  $J = 12.0$  Hz, 1H), 2.73 (d,  $J = 6.0$  Hz, 1H), 1.87 – 1.82 (m, 1H), 1.64 (s, 2H), 1.56 – 1.51 (m, 1H), 1.45 (s, 9H), 1.42 – 1.36 (m, 1H), 1.33 – 1.27 (m, 4H), 1.21 – 1.16 (m, 1H), 0.89 (t,  $J = 6.0$  Hz, 3H);  $^{13}\text{C NMR}$  (151 MHz,  $\text{CDCl}_3$ )  $\delta$  175.78, 136.76, 130.23, 128.16, 126.76, 81.14, 61.99, 45.88, 40.83, 32.12, 28.07, 23.52, 22.44, 13.91; **HRMS(ESI)**  $m/z$ :  $[\text{M}+\text{H}]^+$  Calculated for  $\text{C}_{18}\text{H}_{29}\text{NO}_2^+$  292.2271; found 292.2262.

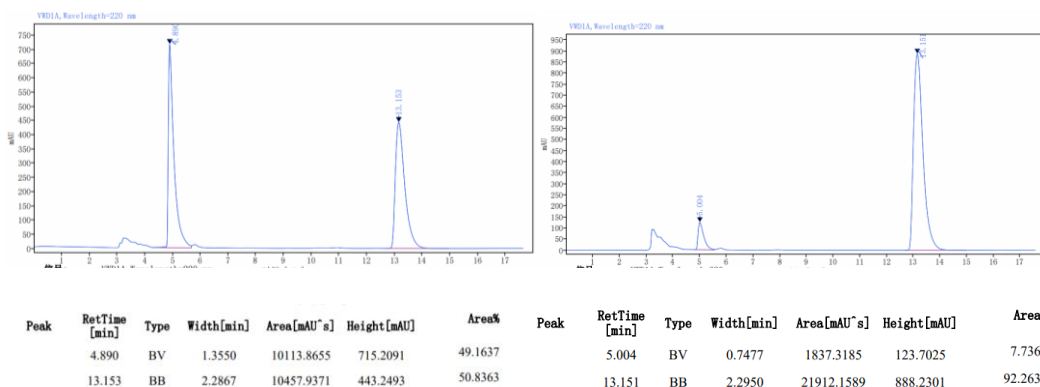

***tert*-Butyl (*S*)-2-amino-2-benzylbutanoate (9p):**

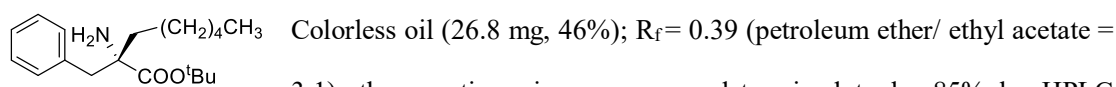

analysis on Daicel Chirapak IC column (hexane/isopropanol = 95/5, flow rate 1.0 mL/min, T = 30 °C), UV 220 nm,  $t_R$ (major) 18.354 min,  $t_R$ (minor) 6.025 min;  $[\alpha]_D^{25} = -9.07$  (c = 0.57, CHCl<sub>3</sub>); <sup>1</sup>H NMR (600 MHz, CDCl<sub>3</sub>) δ 7.28 – 7.25 (m, 2H), 7.22 (t,  $J = 6.0$  Hz, 3H), 3.15 (d,  $J = 12.0$  Hz, 1H), 2.73 (d,  $J = 12.0$  Hz, 1H), 1.87 – 1.83 (m, 1H), 1.57 (s, 2H), 1.54 – 1.51 (m, 1H), 1.45 (s, 9H), 1.41 – 1.37 (m, 1H), 1.30 – 1.27 (m, 7H), 1.17 – 1.15 (m, 1H), 0.88 (t,  $J = 6.0$  Hz, 3H); <sup>13</sup>C NMR (151 MHz, CDCl<sub>3</sub>) δ 175.80, 136.78, 130.23, 128.16, 126.75, 81.12, 61.99, 45.90, 40.89, 31.64, 29.58, 28.08, 23.82, 22.50, 13.96. HRMS(ESI)  $m/z$ :  $[M+H]^+$  Calculated for C<sub>19</sub>H<sub>31</sub>NO<sub>2</sub><sup>+</sup> 306.2428; found 306.2421.

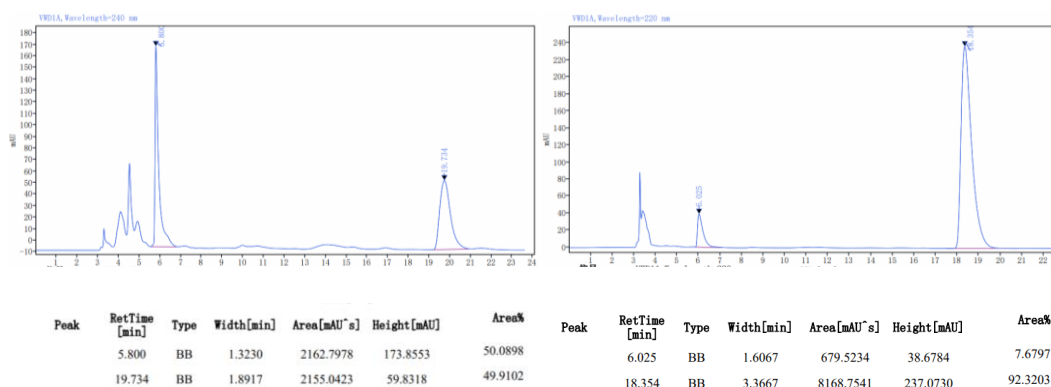

***tert*-Butyl (*S*)-2-amino-2-benzyl-4-phenylbutanoate (9q):**

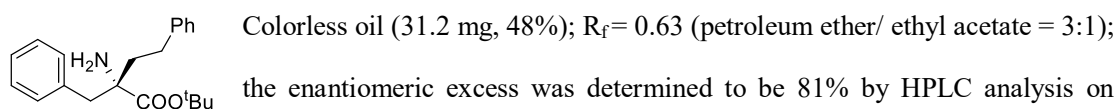

Daicel Chirapak IC column (hexane/isopropanol = 90/10, flow rate 1.0 mL/min, T = 30 °C), UV 220 nm,  $t_R$ (major) 14.238 min,  $t_R$ (minor) 6.922 min;  $[\alpha]_D^{25} = -7.58$  (c = 0.55, CHCl<sub>3</sub>); <sup>1</sup>H NMR (600

**MHz, CDCl<sub>3</sub>**)  $\delta$  7.30 – 7.27 (m, 4H), 7.24 – 7.20 (m, 3H), 7.19 (d,  $J$  = 6.0 Hz, 3H), 3.18 (d,  $J$  = 12.0 Hz, 1H), 2.79 (d,  $J$  = 12.0 Hz, 1H), 2.75 – 2.70 (m, 1H), 2.53 – 2.48 (m, 1H), 2.19 – 2.14 (m, 1H), 1.89 – 1.84 (m, 1H), 1.61 (s, 2H), 1.51 (s, 9H); **<sup>13</sup>C NMR (151 MHz, CDCl<sub>3</sub>)**  $\delta$  175.50, 141.87, 136.49, 130.26, 128.48, 128.33, 128.24, 126.88, 125.95, 81.45, 62.01, 45.95, 42.86, 30.62, 28.16; **HRMS(ESI)**  $m/z$ :  $[M+H]^+$  Calculated for C<sub>21</sub>H<sub>27</sub>NO<sub>2</sub><sup>+</sup> 326.2115; found 326.2115.

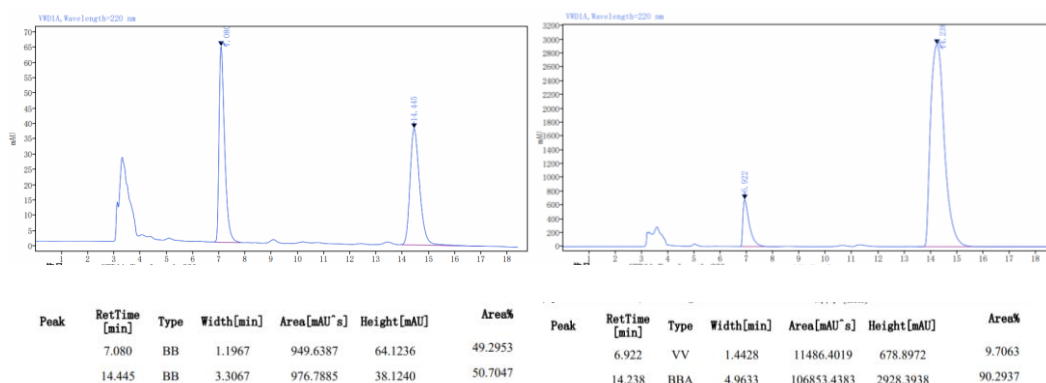

***tert*-Butyl (*R*)-2-amino-2-benzyl-3-(*tert*-butoxy)propanoate (**9r**)** [7]:

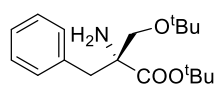

Colorless oil (28.9 mg, 47%);  $R_f$  = 0.56 (petroleum ether/ ethyl acetate = 3:1); the enantiomeric excess was determined to be 97% by HPLC analysis on Daicel Chirapak IC column (hexane/isopropanol = 90/10, flow rate 1.0 mL/min,  $T$  = 30 °C), UV 220 nm,  $t_R$ (major) 8.735 min,  $t_R$ (minor) 5.300 min;  $[\alpha]_D^{25}$  = 2.73 ( $c$  = 0.37, CHCl<sub>3</sub>); **<sup>1</sup>H NMR (600 MHz, CDCl<sub>3</sub>)**  $\delta$  7.26 (t,  $J$  = 6.0 Hz, 2H), 7.22 (t,  $J$  = 6.0 Hz, 3H), 3.72 (d,  $J$  = 6.0 Hz, 1H), 3.31 (d,  $J$  = 6.0 Hz, 1H), 3.04 (d,  $J$  = 12.0 Hz, 1H), 2.70 (d,  $J$  = 12.0 Hz, 1H), 1.77 (s, 2H), 1.44 (s, 9H), 1.17 (s, 9H); **<sup>13</sup>C NMR (151 MHz, CDCl<sub>3</sub>)**  $\delta$  174.55, 136.10, 130.18, 128.13, 126.76, 80.90, 72.79, 68.52, 62.57, 42.15, 28.05, 27.44.

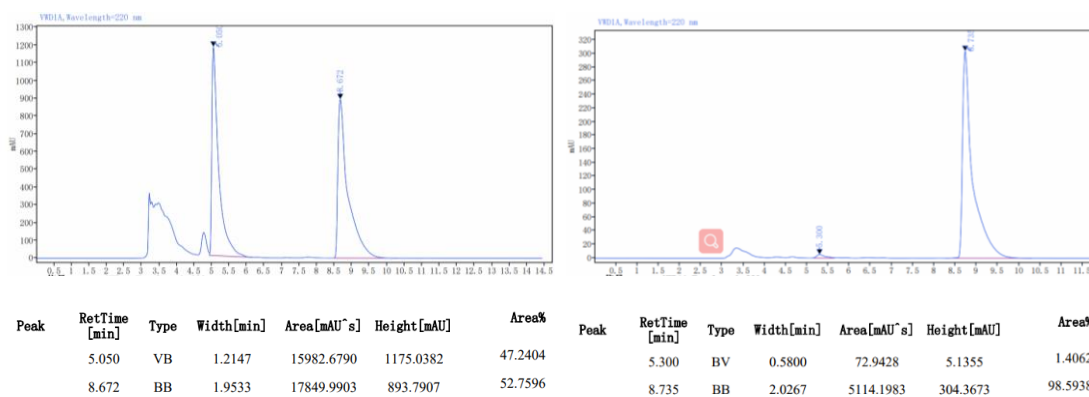

#### 4. Determination of the absolute configuration

The absolute configuration of compound **3a** was established by comparing its optical rotation value with the literature data:

| (S)-product ( <b>3a</b> ) in this work                                                                                                          | (S)-product in literature <sup>[6]</sup>                                                                                                         |
|-------------------------------------------------------------------------------------------------------------------------------------------------|--------------------------------------------------------------------------------------------------------------------------------------------------|
| 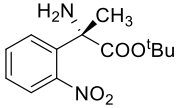<br><i>tert</i> -butyl (S)-2-amino-2-(2-nitrophenyl)propanoate | <br><i>tert</i> -butyl (S)-2-amino-2-(2-nitrophenyl)propanoate |
| $[\alpha]_D^{28} = -58.93$ (c 0.67, CHCl <sub>3</sub> )                                                                                         | $[\alpha]_D^{28} = -71.10$ (c 1.50, CHCl <sub>3</sub> )                                                                                          |

The absolute configuration of compound **6b** was established by comparing its optical rotation value with the literature data:

| (S)-product ( <b>6b</b> ) in this work                                                                                                                                     | (S)-product in literature <sup>[3]</sup>                                                                                                                                    |
|----------------------------------------------------------------------------------------------------------------------------------------------------------------------------|-----------------------------------------------------------------------------------------------------------------------------------------------------------------------------|
| 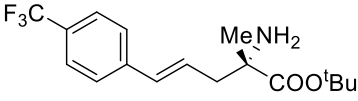<br><i>tert</i> -butyl (S,E)-2-amino-2-methyl-5-(4-(trifluoromethyl)phenyl)pent-4-enoate | <br><i>tert</i> -butyl (S,E)-2-amino-2-methyl-5-(4-(trifluoromethyl)phenyl)pent-4-enoate |
| $[\alpha]_D^{20} = -6.56$ (c 0.78, CHCl <sub>3</sub> )                                                                                                                     | $[\alpha]_D^{20} = -8.30$ (c 1.0, CHCl <sub>3</sub> )                                                                                                                       |

The absolute configuration of compound **9a** was established by comparing its optical rotation value with the literature data:

| (S)-product ( <b>9a</b> ) in this work                                                                                                            | (S)-product in literature <sup>[7]</sup>                                                                                                           |
|---------------------------------------------------------------------------------------------------------------------------------------------------|----------------------------------------------------------------------------------------------------------------------------------------------------|
| 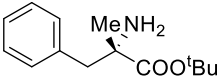<br><i>tert</i> -butyl (S)-2-amino-2-methyl-3-phenylpropanoate | <br><i>tert</i> -butyl (S)-2-amino-2-methyl-3-phenylpropanoate |
| $[\alpha]_D^{25} = -12.96$ (c 0.58, CHCl <sub>3</sub> )                                                                                           | $[\alpha]_D^{25} = -27.54$ (c 0.47, CHCl <sub>3</sub> )                                                                                            |

The absolute configuration of compound **13** was established by comparing its optical rotation value with the literature data:

| (R)-product ( <b>13</b> ) in this work | (R)-product in literature <sup>[8]</sup> |
|----------------------------------------|------------------------------------------|
|----------------------------------------|------------------------------------------|



|                                                                                                                                                                                                                                     |                                                                                                                                                                                                                                       |
|-------------------------------------------------------------------------------------------------------------------------------------------------------------------------------------------------------------------------------------|---------------------------------------------------------------------------------------------------------------------------------------------------------------------------------------------------------------------------------------|
| 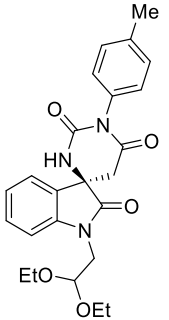 <p>(<i>R</i>)-1-(2,2-diethoxyethyl)-1'-(<i>p</i>-tolyl)-1'<i>H</i>-spiro<br/>[indoline-3,4'-pyrimidine]-2,2',6'(3'<i>H</i>,5'<i>H</i>)-trione</p> |  <p>(<i>R</i>)-1-(2,2-diethoxyethyl)-1'-(<i>p</i>-tolyl)-1'<i>H</i>-spiro<br/>[indoline-3,4'-pyrimidine]-2,2',6'(3'<i>H</i>,5'<i>H</i>)-trione</p> |
| $[\alpha]_D^{24} = 59.16$ (c 0.22, CHCl <sub>3</sub> )                                                                                                                                                                              | $[\alpha]_D^{24} = 61.30$ (c 1.28, CHCl <sub>3</sub> )                                                                                                                                                                                |

### 5. The formal synthesis of (+)-AG-041R

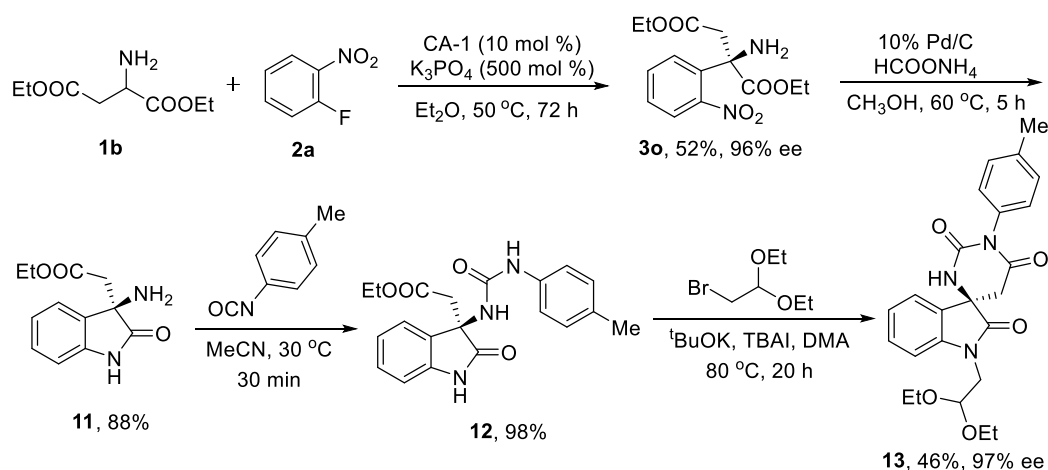

#### Diethyl (*R*)-2-amino-2-(2-nitrophenyl)succinate (**3o**)

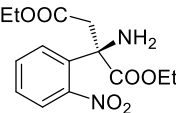
 Chiral aldehyde **CA-1** (6.3 mg, 0.02 mmol), amino acid ester **1b** (75.6 mg, 0.04 mmol), Et<sub>2</sub>O (2 mL) and K<sub>3</sub>PO<sub>4</sub> (212 mg, 1 mmol) were added successively to a 10 mL reaction tube with stirring magneton. The mixture was stirred for 10 min at room temperature, and then compound **2a** (28.2 mg, 0.02 mmol) was added. The reaction system was sealed and continuously stirred at 50 °C for 72 h. After the reaction completed (detected by TLC), the solvent was removed by rotary evaporation, and the residue was purified by flash chromatography column on silica gel (eluent: petroleum ether/ ethyl acetate/ triethylamine =300/100/4) to give a pale yellow oil **3o** (32.2 mg, 52%); *R*<sub>f</sub> = 0.42 (petroleum ether/ ethyl acetate = 2:1); the enantiomeric excess was determined to be 96% by HPLC analysis on Daicel Chirapak IG column (hexane/isopropanol = 70/30, flow rate 1.0 mL/min, T = 30 °C), UV 254 nm, *t*<sub>R</sub>(major) 16.689 min, *t*<sub>R</sub>(minor) 12.347 min;  $[\alpha]_D^{25} = -57.86$  (c = 0.58, CHCl<sub>3</sub>); <sup>1</sup>H NMR (600 MHz, CDCl<sub>3</sub>) δ 7.91 (d, *J* = 6.0 Hz, 1H), 7.77 (d,

$J = 6.0$  Hz, 1H), 7.58 (t,  $J = 9.0$  Hz, 1H), 7.45 (t,  $J = 9.0$  Hz, 1H), 4.19 (q,  $J = 6.0$  Hz, 2H), 4.11 (q,  $J = 6.0$  Hz, 2H), 3.25 (d,  $J = 18.0$  Hz, 1H), 3.12 (d,  $J = 18.0$  Hz, 1H), 2.61 (s, 2H), 1.25 – 1.20 (m, 6H);  $^{13}\text{C}$  NMR (151 MHz,  $\text{CDCl}_3$ )  $\delta$  172.73, 170.80, 149.24, 136.29, 132.22, 128.80, 128.77, 124.94, 62.20, 61.95, 60.75, 42.76, 14.03, 13.84; HRMS(ESI)  $m/z$ :  $[\text{M}+\text{H}]^+$  Calculated for  $\text{C}_{18}\text{H}_{20}\text{NO}_3^+$  298.1438; found 298.1435.

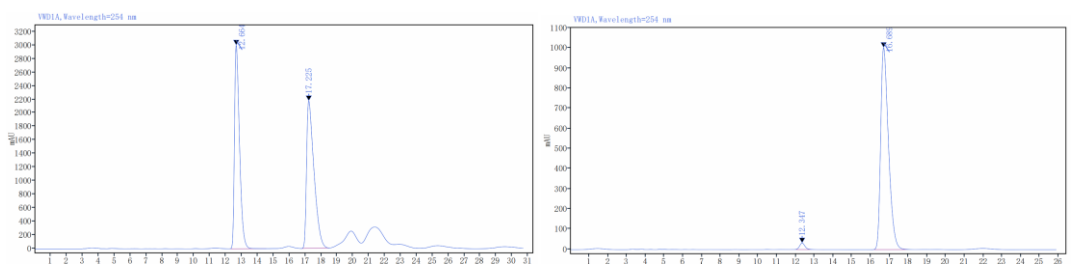

| Peak | RetTime [min] | Type | Width [min] | Area [mAU*s] | Height [mAU] | Area%   | Peak | RetTime [min] | Type | Width [min] | Area [mAU*s] | Height [mAU] | Area%   |
|------|---------------|------|-------------|--------------|--------------|---------|------|---------------|------|-------------|--------------|--------------|---------|
|      | 12.664        | BB   | 2.3317      | 65794.4445   | 2997.1415    | 48.3356 |      | 12.347        | BB   | 1.8233      | 640.0913     | 32.3327      | 2.1559  |
|      | 17.225        | BB   | 1.7646      | 70325.7028   | 2172.0285    | 51.6644 |      | 16.689        | BB   | 2.3383      | 29050.3166   | 1003.7082    | 97.8441 |

### Ethyl (*R*)-2-(3-amino-2-oxoindolin-3-yl)acetate (**11**)

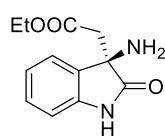

The compound **3o** (31.3 mg, 0.01 mmol),  $\text{NH}_4\text{HCO}_2$  (63.1 mg, 1 mmol), 10% Pd/C (3.0 mg, 0.001 mmol) and MeOH (1 mL) were added into a 10 mL reaction tube.

The reaction system was sealed and stirred for 5 h at 60 °C. After the reaction completed, the solvent was removed by rotary evaporation, and the residue was purified by flash chromatography column on silica gel (eluent: petroleum ether/ ethyl acetate/ =1/3) to give white solid **11** (20.6 mg, 0.088 mmol, 88%); m.p. = 143-145 °C;  $R_f$  = 0.26 (petroleum ether/ ethyl acetate = 1:3);  $^1\text{H}$  NMR (600 MHz,  $\text{CDCl}_3$ )  $\delta$  8.22 (s, 1H), 7.38 (d,  $J = 12.0$  Hz, 1H), 7.28 – 7.22 (m, 1H), 7.04 (t,  $J = 9.0$  Hz, 1H), 6.89 (d,  $J = 12.0$  Hz, 1H), 4.01 (m, 2H), 2.94 (s, 2H), 1.85 (s, 2H), 1.10 (t,  $J = 6.0$  Hz, 3H);  $^{13}\text{C}$  NMR (151 MHz,  $\text{CDCl}_3$ )  $\delta$  180.96, 169.47, 140.71, 131.34, 129.36, 124.14, 122.83, 110.08, 60.65, 58.90, 42.66, 13.87; HRMS(ESI)  $m/z$ :  $[\text{M}+\text{H}]^+$  Calculated for  $\text{C}_{12}\text{H}_{15}\text{N}_2\text{O}_3^+$  235.1077; found 235.1079.

### Ethyl (*R*)-2-(2-oxo-3-(3-(*p*-tolyl)ureido)indolin-3-yl)acetate (**12**)

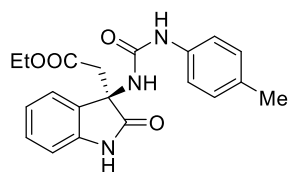

To a solution of **11** (20.6 mg, 0.088 mmol) in MeCN (1.0 mL) was added *p*-tolyl isocyanate (10.0  $\mu\text{L}$ , 0.11 mmol), and the mixture was stirred for 30 min at room temperature. After the reaction completed, the solvent was removed by rotary evaporation, and the residue was purified by flash chromatography column on silica gel (eluent: petroleum ether/ ethyl acetate/ =1/2) to give white solid **12** (31.7 mg, 0.086

mmol, 98%);  $R_f = 0.53$  (petroleum ether/ ethyl acetate = 1:3);  $^1\text{H NMR}$  (600 MHz,  $\text{CD}_3\text{OD}$ )  $\delta$  7.27 (d,  $J = 6.0$  Hz, 1H), 7.22 (t,  $J = 6.0$  Hz, 1H), 7.10 (d,  $J = 12.0$  Hz, 2H), 7.02 – 6.97 (m, 3H), 6.90 (d,  $J = 6.0$  Hz, 1H), 4.09 (m, 2H), 2.88 (d,  $J = 18.0$  Hz, 1H), 2.68 (d,  $J = 18.0$  Hz, 1H), 2.22 (s, 3H), 1.15 (t,  $J = 6.0$  Hz, 3H);  $^{13}\text{C NMR}$  (151 MHz,  $\text{CD}_3\text{OD}$ )  $\delta$  178.75, 169.39, 154.72, 141.50, 136.29, 132.03, 130.44, 128.82, 128.68, 122.85, 121.93, 119.25, 109.94, 60.77, 59.60, 19.29, 12.87; **HRMS(ESI)**  $m/z$ :  $[\text{M}+\text{H}]^+$  Calculated for  $\text{C}_{20}\text{H}_{22}\text{N}_3\text{O}_4^+$  368.1605; found 368.1606.

**(R)-1-(2,2-diethoxyethyl)-1'-(p-tolyl)-1'H-spiro[indoline-3,4'-pyrimidine]-2,2',6'(3'H,5'H)-trione (13)**

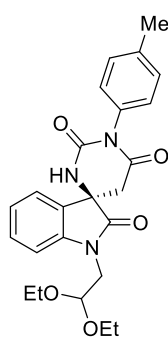

To a solution of **12** (31.7 mg, 0.086 mmol) in DMA (1.5 mL) were added potassium *tert*-butoxide (19.3 mg, 0.172 mmol, 2.0 equiv), bromoacetaldehyde diethyl acetal (19.7  $\mu\text{L}$ , 0.13 mmol) and tetrabutylammonium iodide (7.9 mg, 0.02 mmol). The mixture was stirred at 80 °C for 20 h and then cooled to ambient temperature. Saturated  $\text{NH}_4\text{Cl}$  (3 mL) was added and the mixture was extracted with  $\text{Et}_2\text{O}$  (2 $\times$ 20 mL). The combined organic layers were washed with brine, dried over  $\text{MgSO}_4$ , and concentrated in vacuo. The residue was purified by flash chromatography column on silica gel (eluent: petroleum ether/ ethyl acetate/ =1/1) to give white solid **13** (17.3 mg, 0.040 mmol, 46%); m.p. = 162 -163 °C;  $R_f = 0.46$  (petroleum ether/ ethyl acetate = 1:1); the enantiomeric excess was determined to be 97% by HPLC analysis on Daicel Chirapak IA column (hexane/isopropanol = 70/30, flow rate 1.0 mL/min, T = 30 °C), UV 254 nm,  $t_R$ (major) 11.402 min,  $t_R$ (minor) 19.530 min;  $[\alpha]_D^{24} = 59.16$  (c = 0.22  $\text{CHCl}_3$ );  $^1\text{H NMR}$  (600 MHz,  $\text{CDCl}_3$ )  $\delta$  7.41 – 7.37 (m, 2H), 7.28 (d,  $J = 6.0$  Hz, 2H), 7.23 (d,  $J = 6.0$  Hz, 2H), 7.17 – 7.12 (m, 2H), 5.58 (s, 1H), 4.70 (t,  $J = 6.0$  Hz, 1H), 3.87 (dd,  $J = 12.0, 6.0$  Hz, 1H), 3.77 – 3.72 (m, 3H), 3.54 – 3.49 (m, 2H), 3.21 (d,  $J = 18.0$  Hz, 1H), 2.89 (d,  $J = 18.0$  Hz, 1H), 2.39 (s, 3H), 1.14 (m, 6H);  $^{13}\text{C NMR}$  (151 MHz,  $\text{CDCl}_3$ )  $\delta$  175.29, 167.03, 154.23, 143.08, 138.54, 132.15, 130.81, 129.88, 128.42, 126.60, 123.70, 123.31, 111.01, 100.21, 63.69, 63.56, 43.64, 39.99, 21.22, 15.24, 15.23; **HRMS(ESI)**  $m/z$ :  $[\text{M}+\text{H}]^+$  Calculated for  $\text{C}_{24}\text{H}_{28}\text{N}_3\text{O}_5^+$  438.2023; found 438.2024.

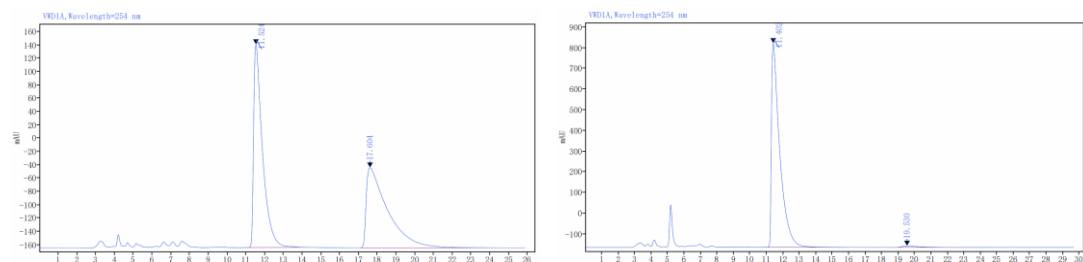

| Peak | RetTime [min] | Type | Width[min] | Area[mAU*s] | Height[mAU] | Area%   | Peak | RetTime [min] | Type | Width[min] | Area[mAU*s] | Height[mAU] | Area%   |
|------|---------------|------|------------|-------------|-------------|---------|------|---------------|------|------------|-------------|-------------|---------|
|      | 11.524        | BM m | 0.4728     | 9977.5374   | 304.8973    | 51.2040 |      | 11.402        | BB   | 7.1400     | 34640.9449  | 985.7359    | 98.4711 |
|      | 17.604        | BB   | 8.1100     | 9508.3359   | 120.2702    | 48.7960 |      | 19.530        | BB   | 5.8200     | 537.8391    | 7.2280      | 1.5289  |

## 6. References

- [1] Kasagani, V. P., Kurma, S. H., Bhimapaka, C. R. *J. Org. Chem.* **2020**, *85*, 2976-2983.
- [2] Chen, L., Luo, M. J., Zhu, F., Wen, W., Guo, Q. X. *J. Am. Chem. Soc.* **2018**, *140*, 9774-9780.
- [3] Huo, X., He, R., Fu, J., Zhang, J., Yang, G., Zhang, W. *J. Am. Chem. Soc.* **2017**, *139*, 9819-9822.
- [4] Jette, C. I., Tong, Z. J., Hadt, R. G., Stoltz, B. M. *Angew. Chem., Int. Ed.* **2020**, *132*, 2049-2054.
- [5] Ardolino, M. J., Morken, J. P. *J. Am. Chem. Soc.* **2014**, *136*, 7092-7100.
- [6] Shirakawa S., Yamamoto K., Tokuda T., Maruoka, K. *Asian J. Org. Chem.* **2014**, *3*, 433-436.
- [7] Liu, J. H., Wen, W., Liao, J., Shen, Q. W., Lin, Y., Wu, Z. L., Guo, Q. X. *Nat. Commun.* **2022**, *13*, 2509.
- [8] Sato, S., Shibuya, M., Kanoh, N., Iwabuchi, Y. *J. Org. Chem.* **2009**, *74*, 7522-7524.

## 7. The spectra of $^1\text{H}$ NMR and $^{13}\text{C}$ NMR

SHR-1H.14.fid  
SHR01-12-1

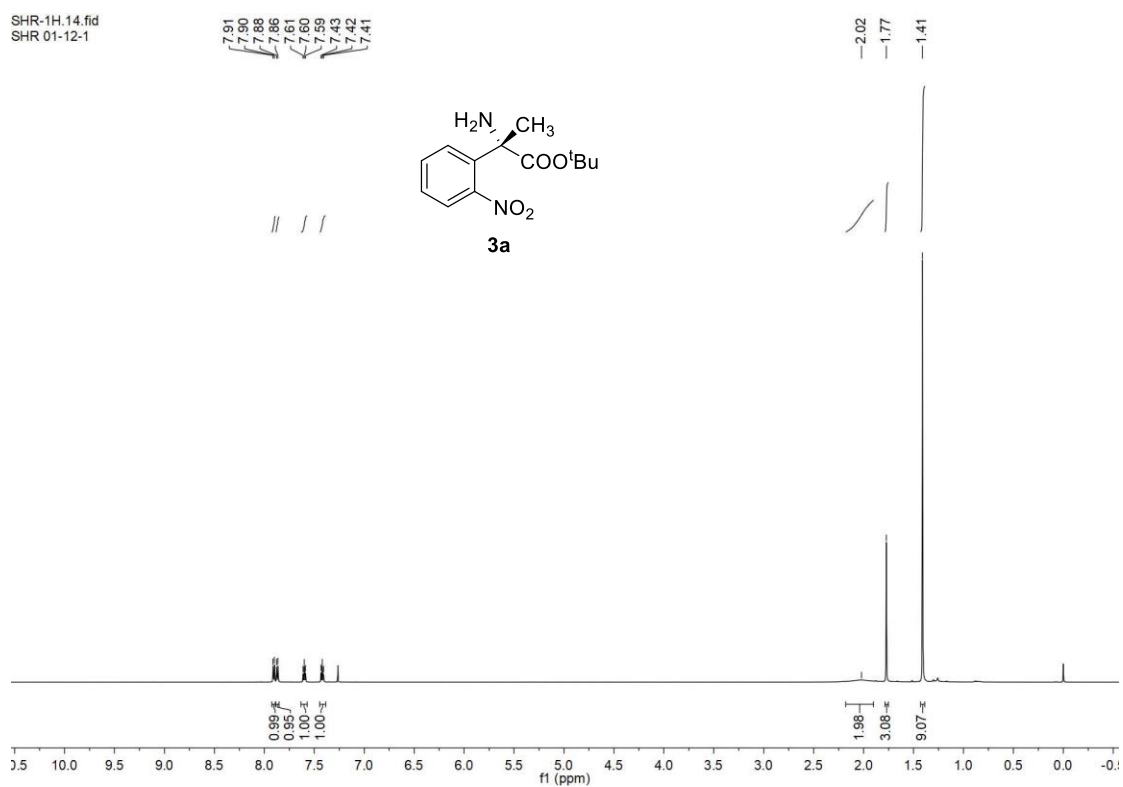

SHR-13C.31.fid  
SHR2201-12-1

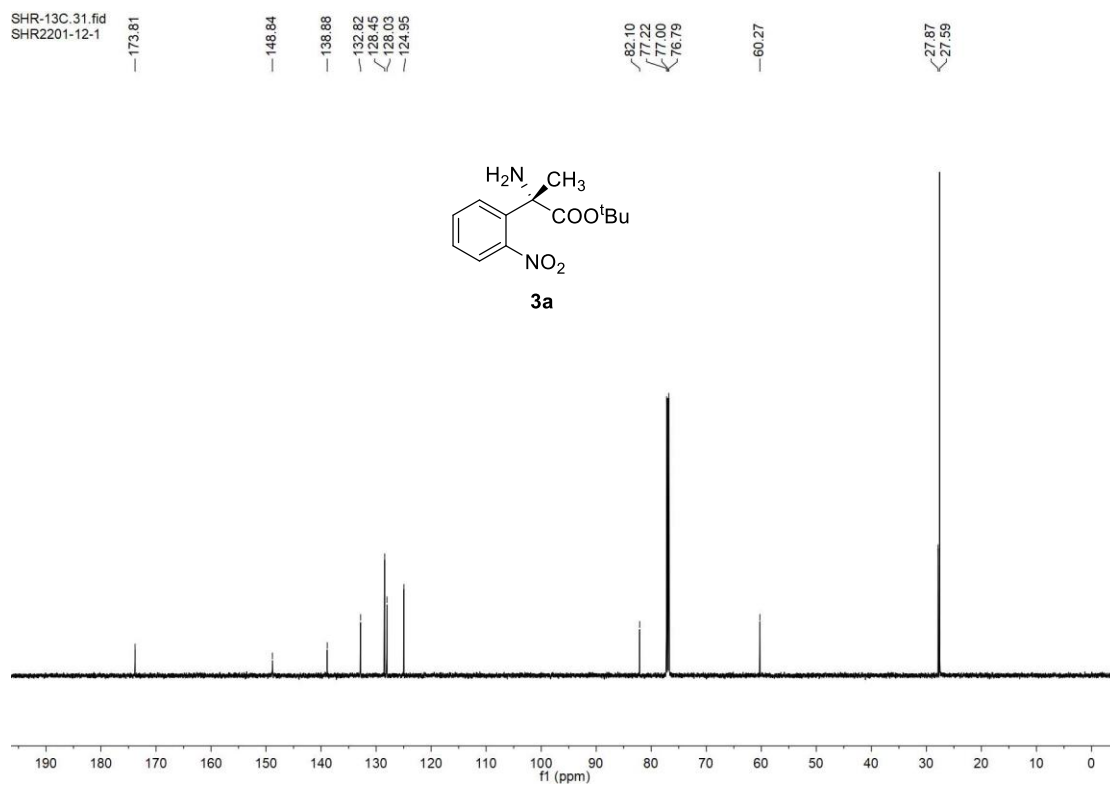

SHR-1H.48.fid  
SHR2205-31-1

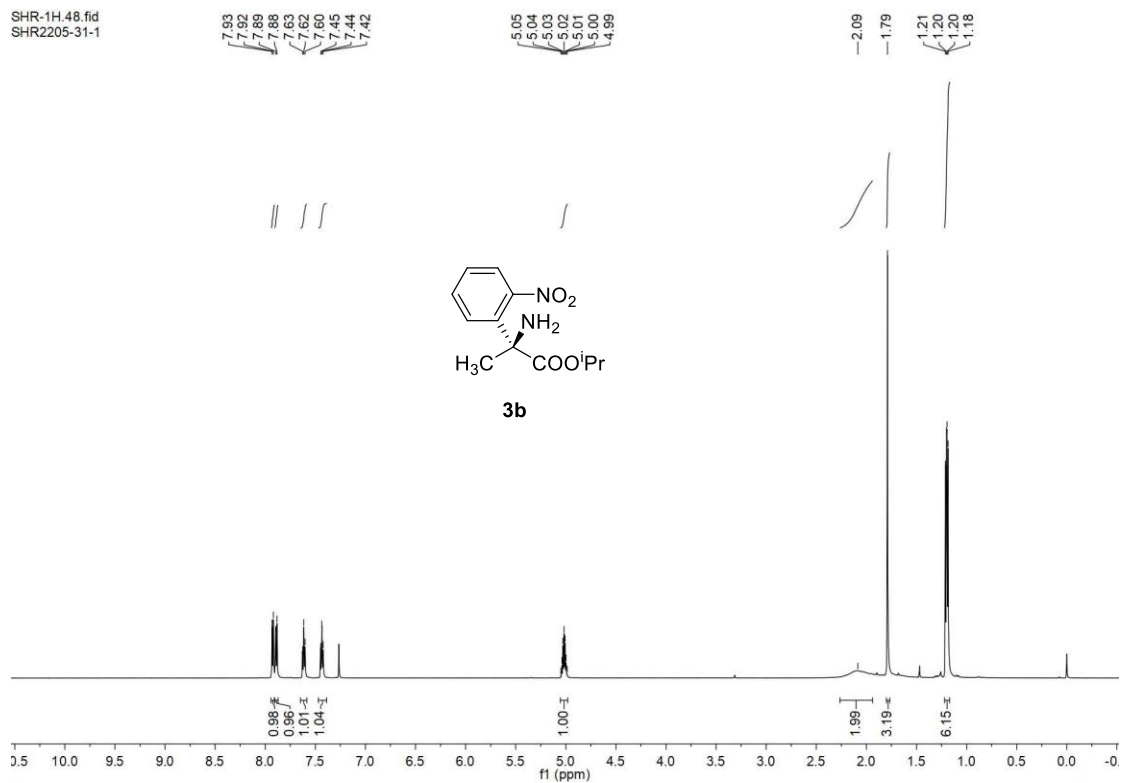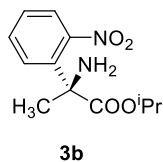

SHR-13C.48.fid  
SHR2205-31-1

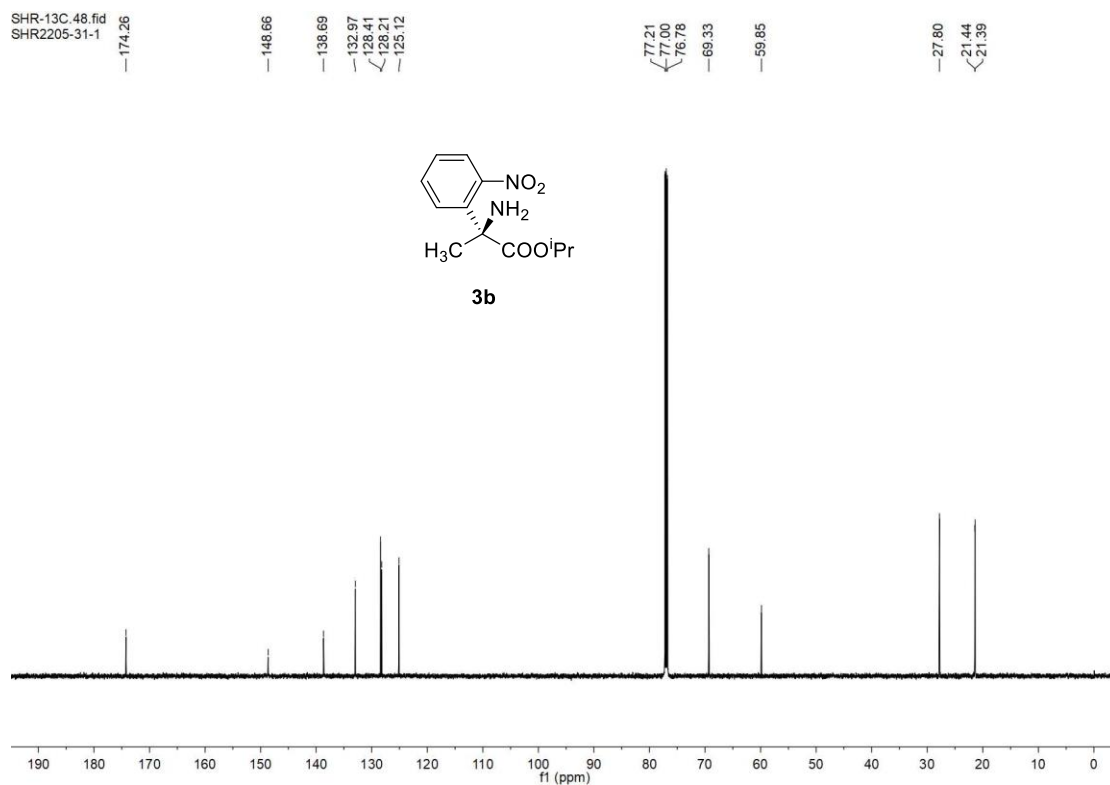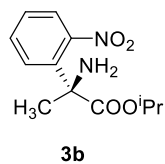

SHR-1H.37.fid  
SHR2205-16-2

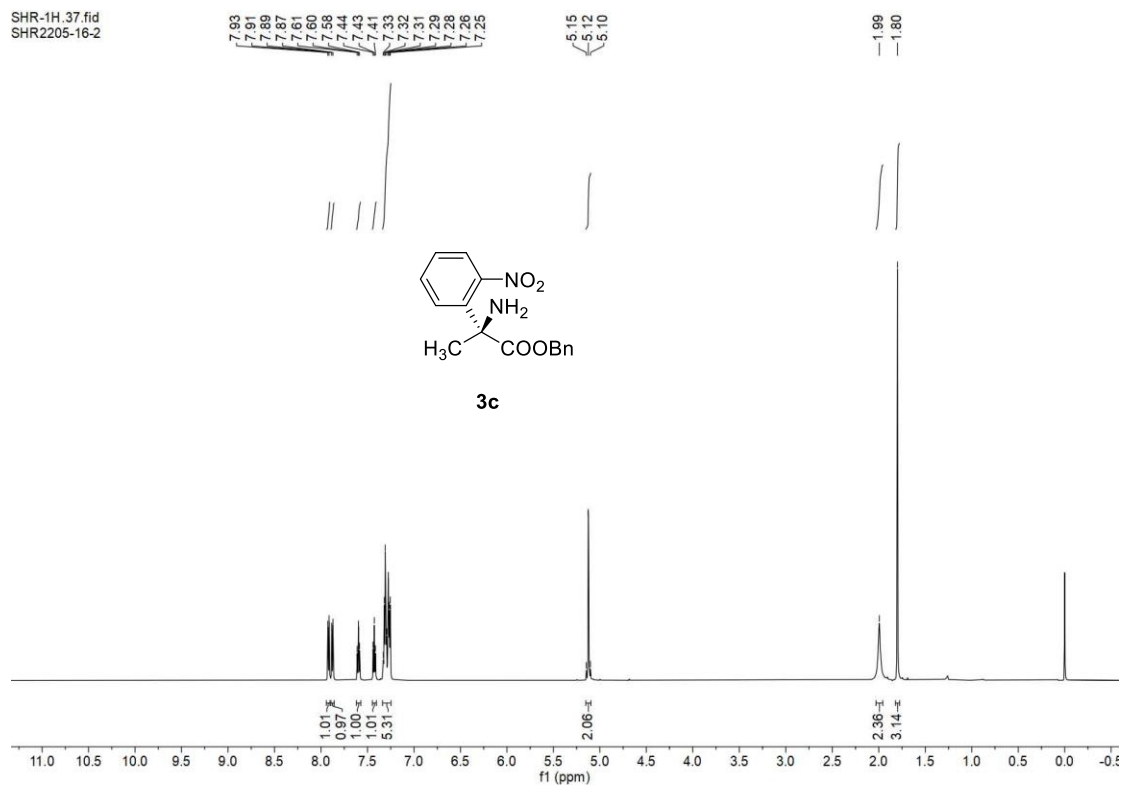

SHR-13C.37.fid  
SHR2205-16-2

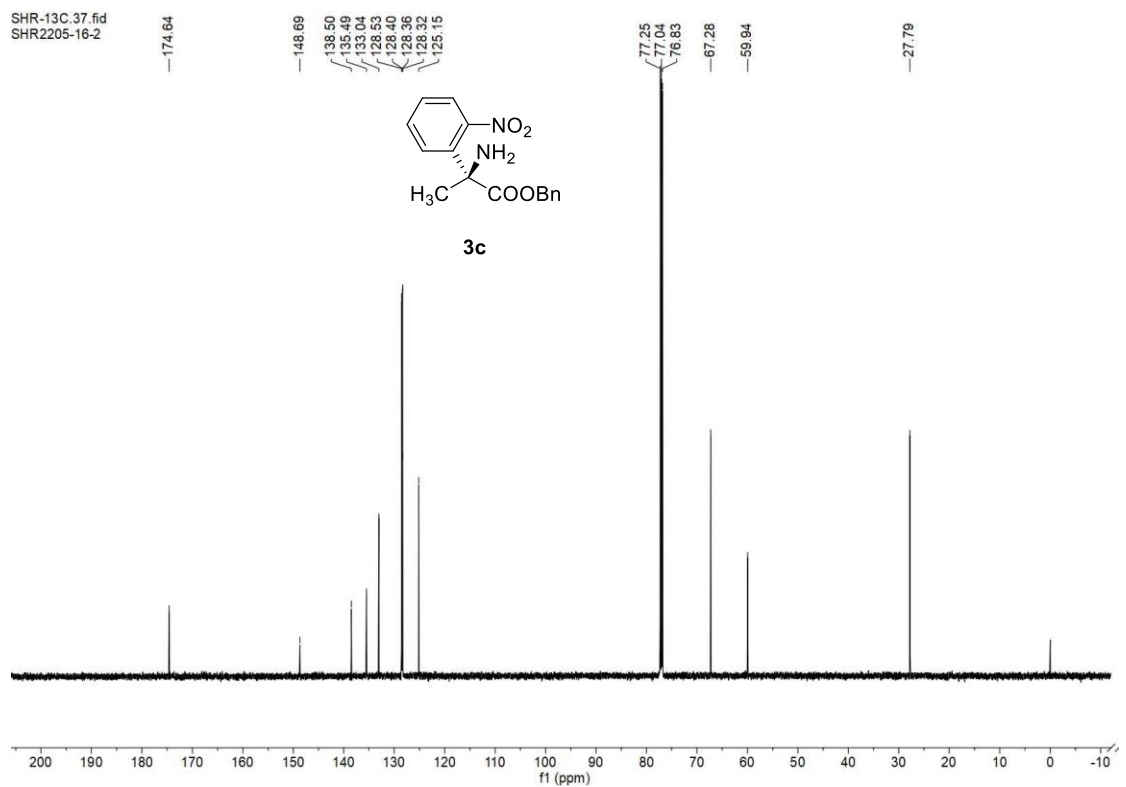

SHR-1H.25.fid  
SHR2203-27-4

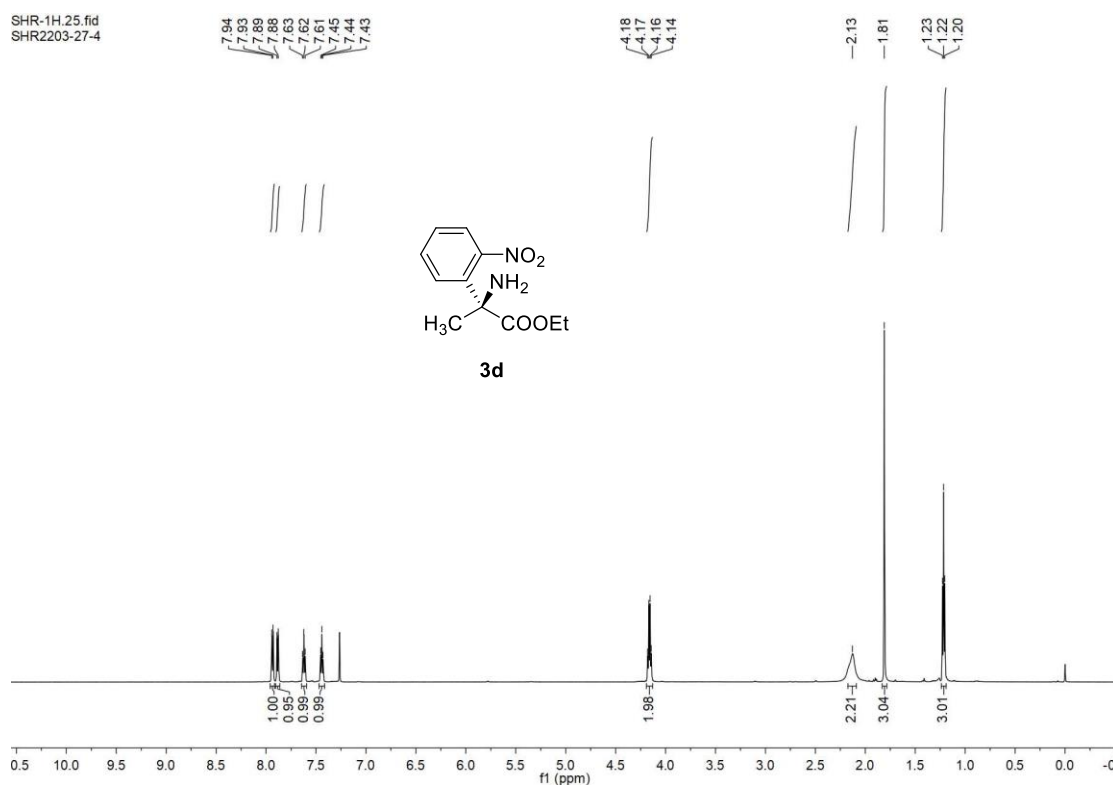

SHR-13C.9.fid  
SHR2203-27-4

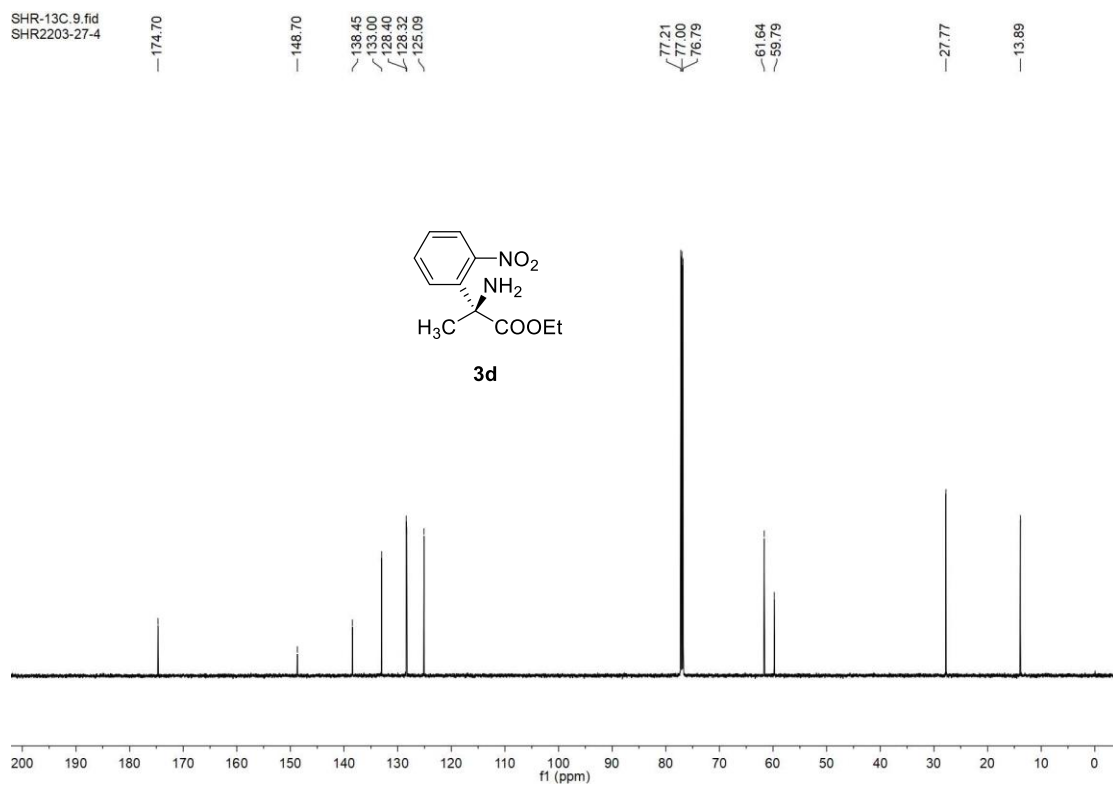



SHR-1H.36.fid  
SHR2205-16-1

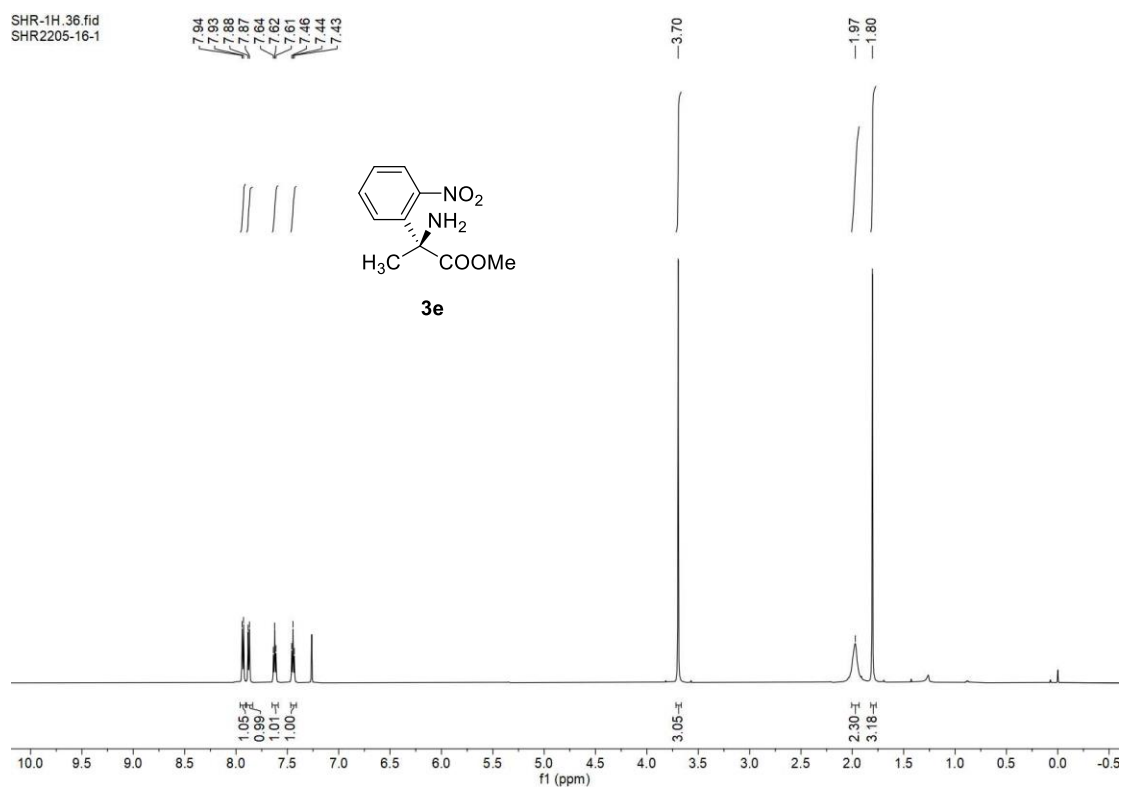

SHR-13C.36.fid  
SHR2205-16-1

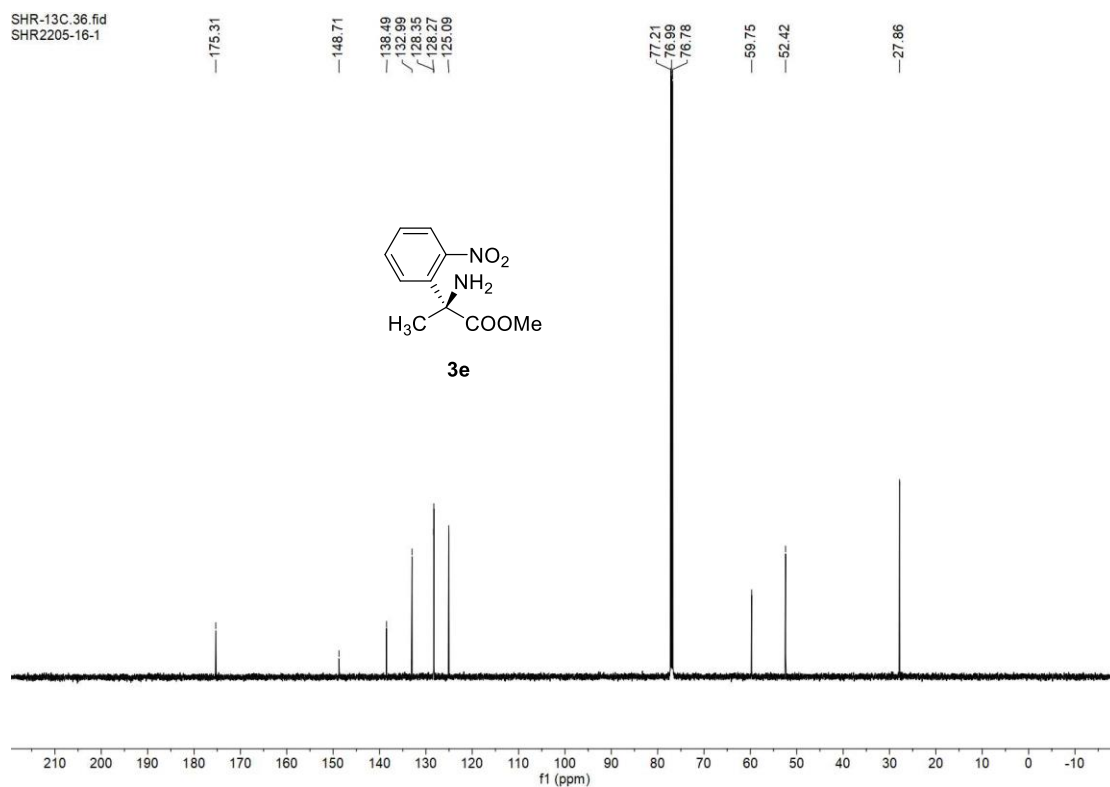

SHR-1H.21.fid  
SHR2203-30-5

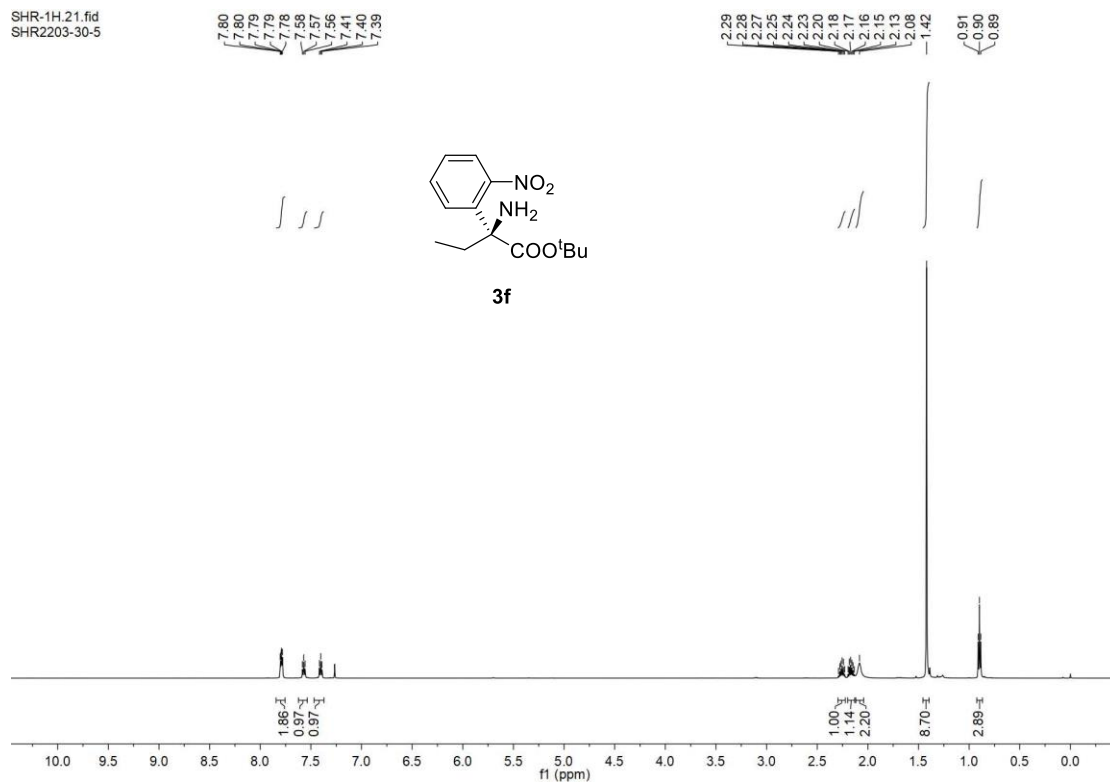

SHR-13C.21.fid  
SHR2203-30-5

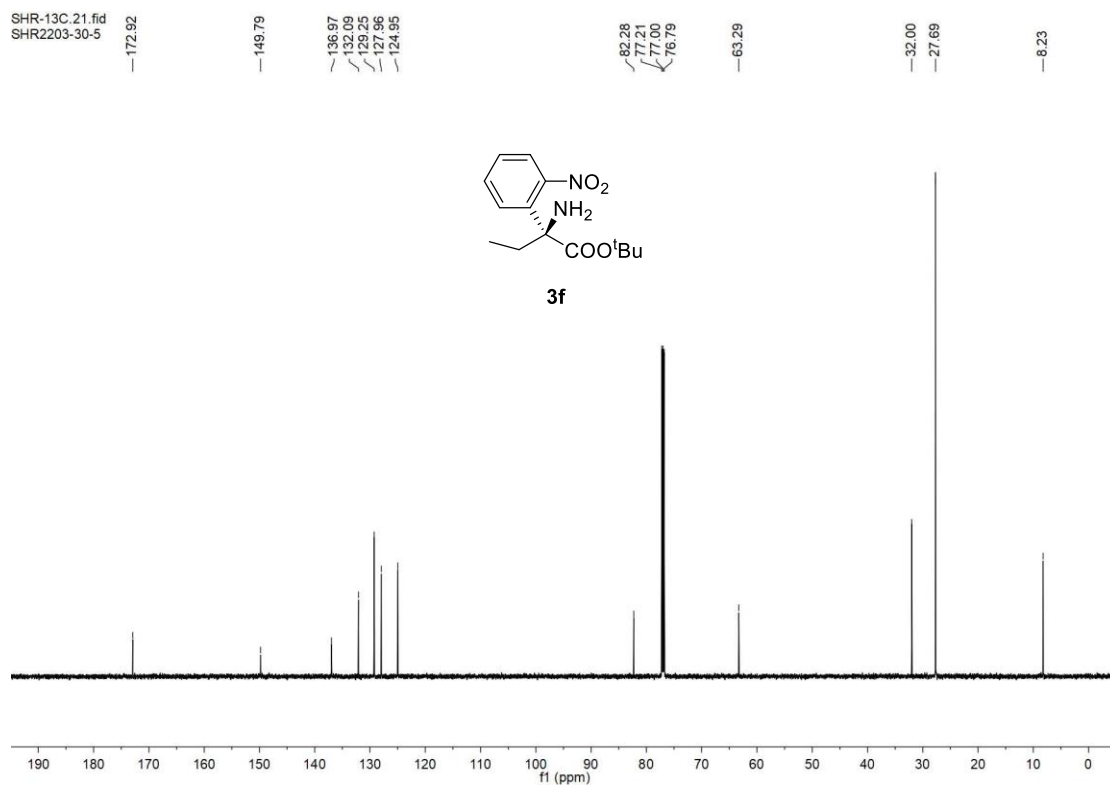

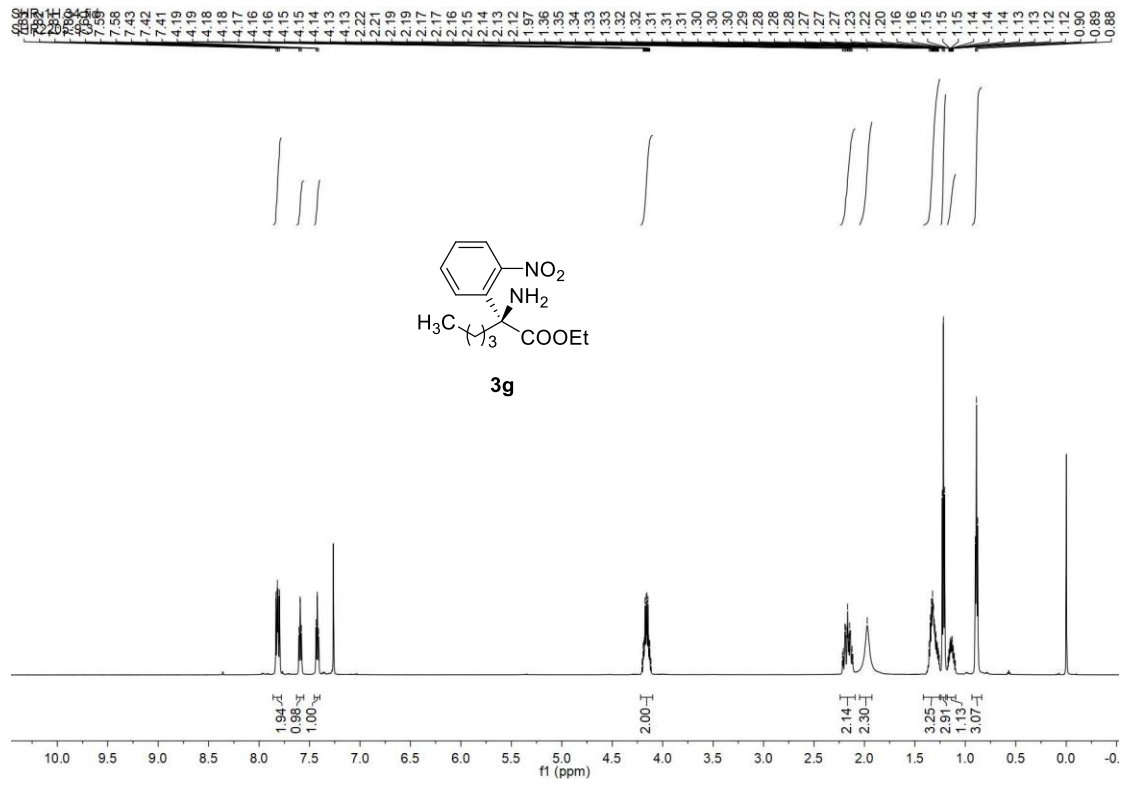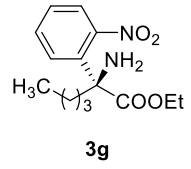

SHR-13C.32.fid  
SHR2205-9-3

-174.17  
-149.53  
137.01  
132.29  
129.07  
128.17  
125.01  
77.22  
77.00  
76.79  
62.60  
61.50  
38.88  
25.94  
22.89  
13.94  
13.85

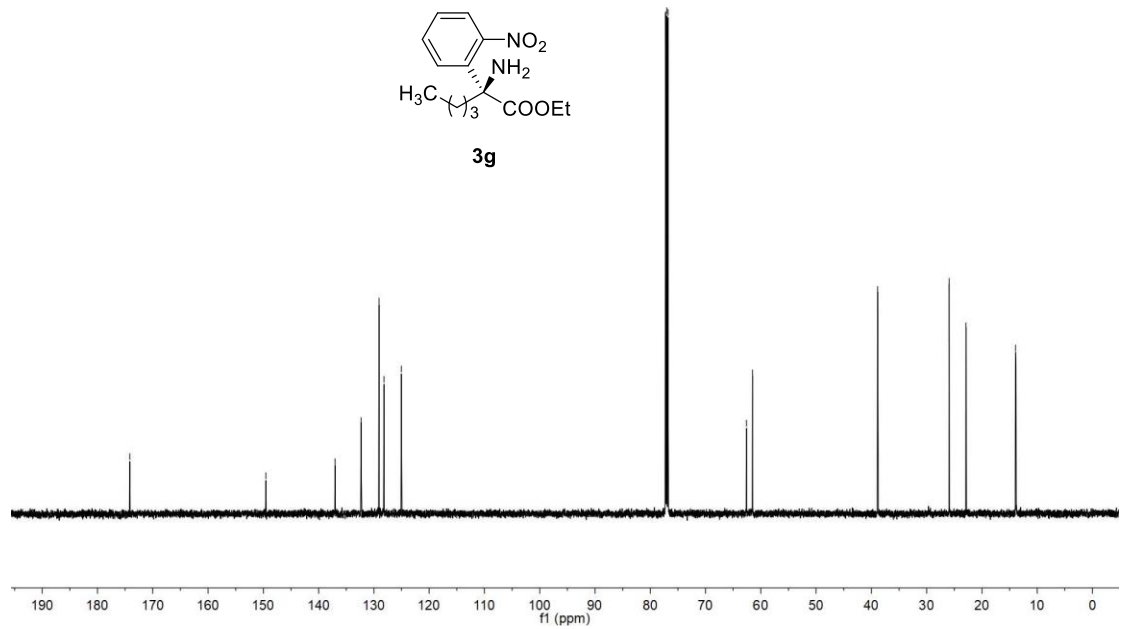

SHR-1H.25.fid  
SHR2207-12-3

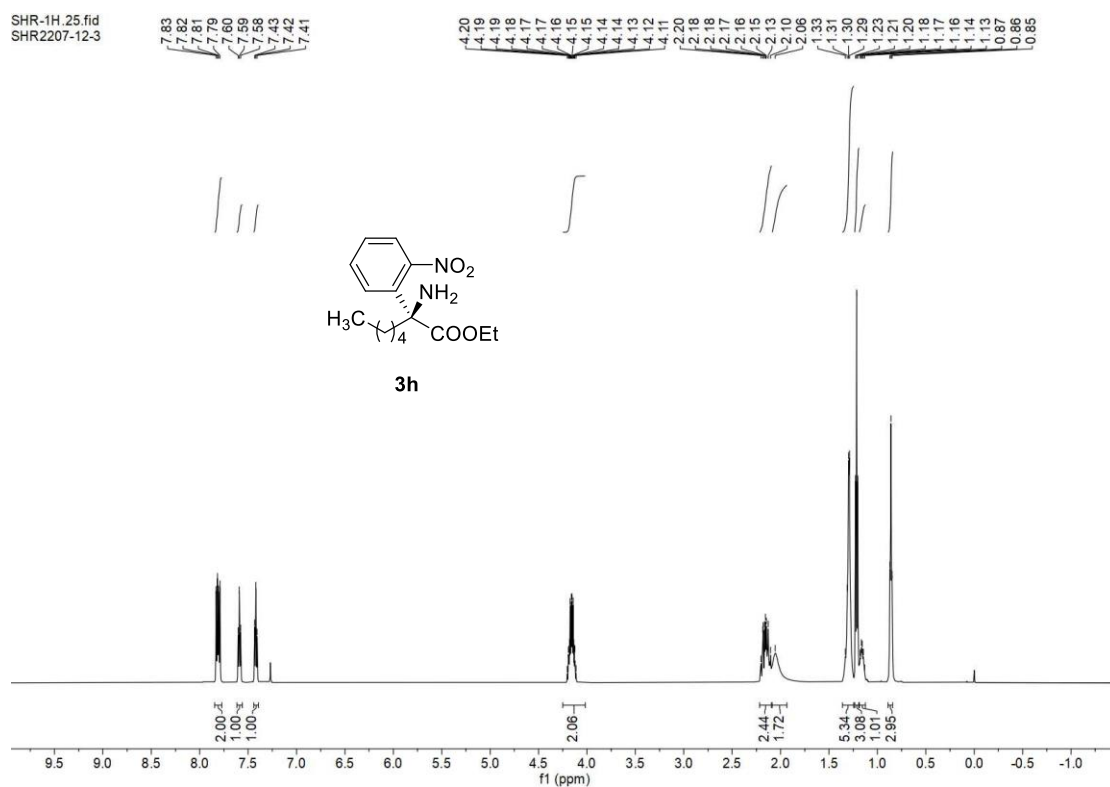

SHR-13C.11.fid  
SHR2207-12-3

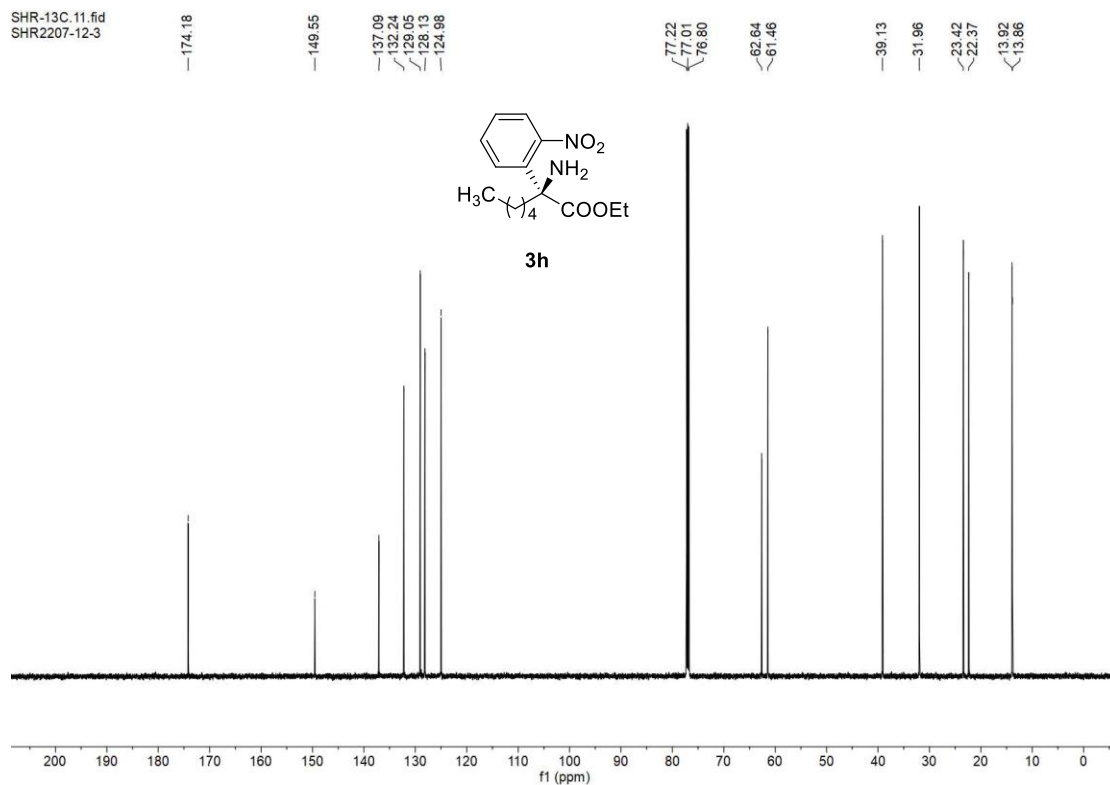

SHR-1H.35.fid  
SHR2205-9-4

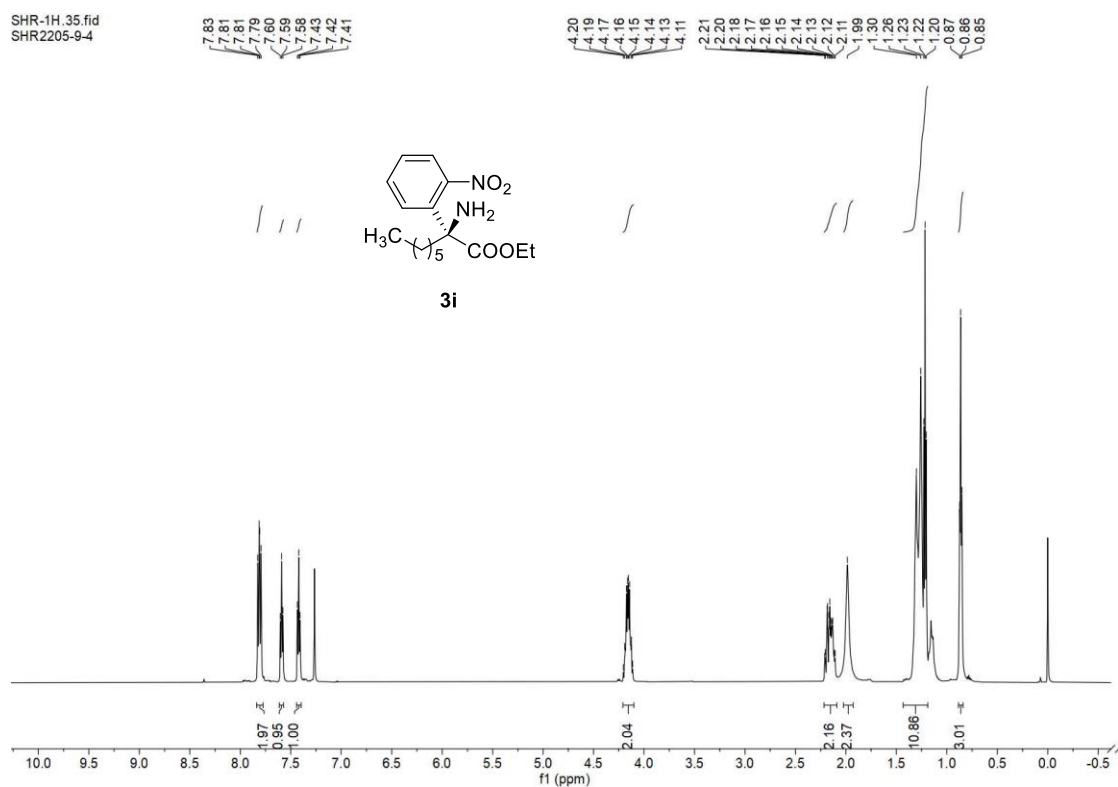

SHR-13C.33.fid  
SHR2205-9-4

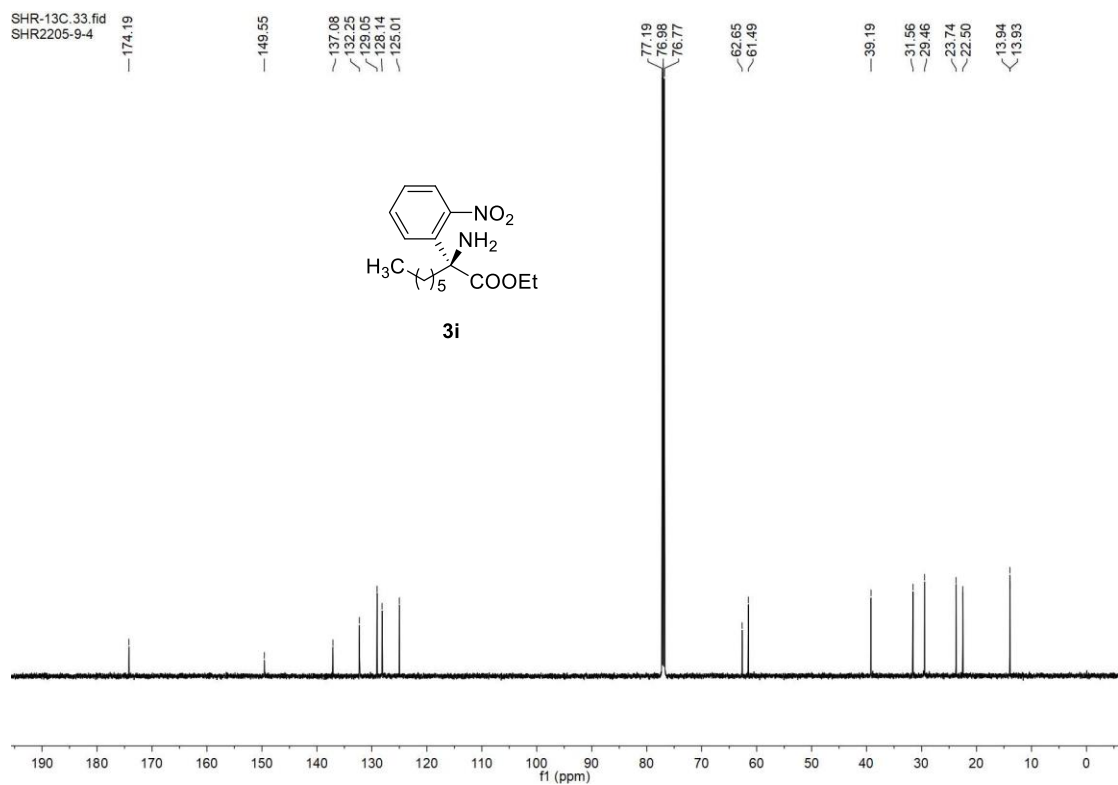

SHR-1H.1.fid  
SHR 03-21-3

7.97  
7.96  
7.80  
7.79  
7.57  
7.56  
7.55  
7.41  
7.40

2.19  
2.18  
2.16  
2.15  
2.06  
2.05  
2.03  
2.02  
1.86  
1.72  
1.71  
1.70  
1.69  
1.68  
1.67  
1.66  
1.65  
1.45  
0.94  
0.95  
0.71  
0.70

////

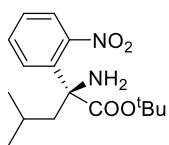

3j

////

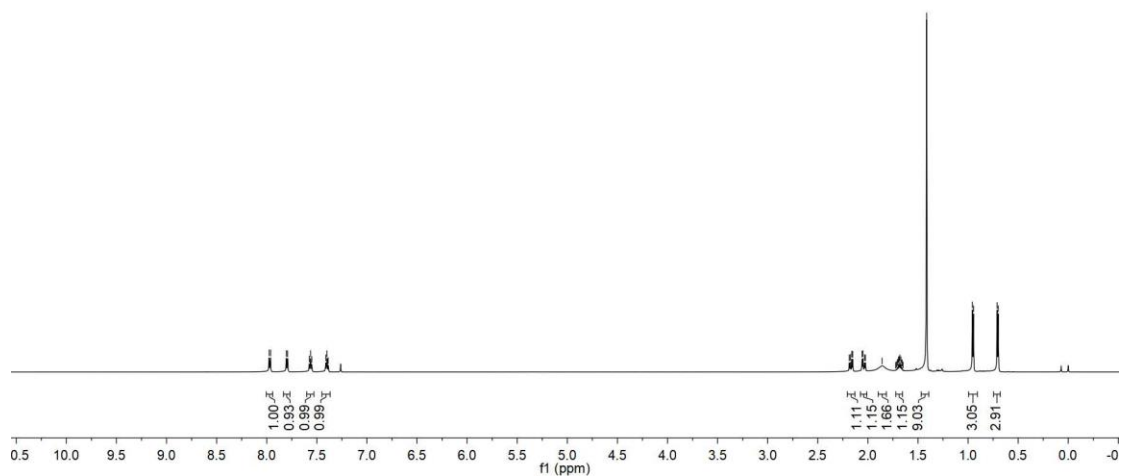

SHR-13C.44.fid  
SHR 03-21-3

173.24

149.42

137.82

131.98

129.25

127.90

124.87

82.08

63.50

46.92

27.68

24.81

24.38

23.91

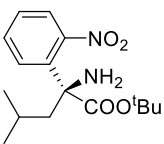

3j

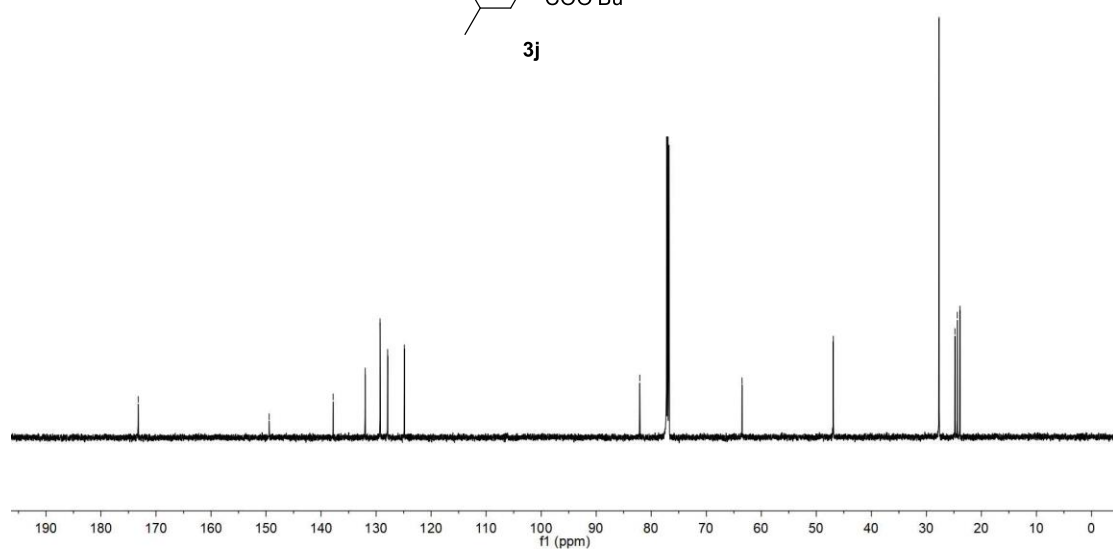

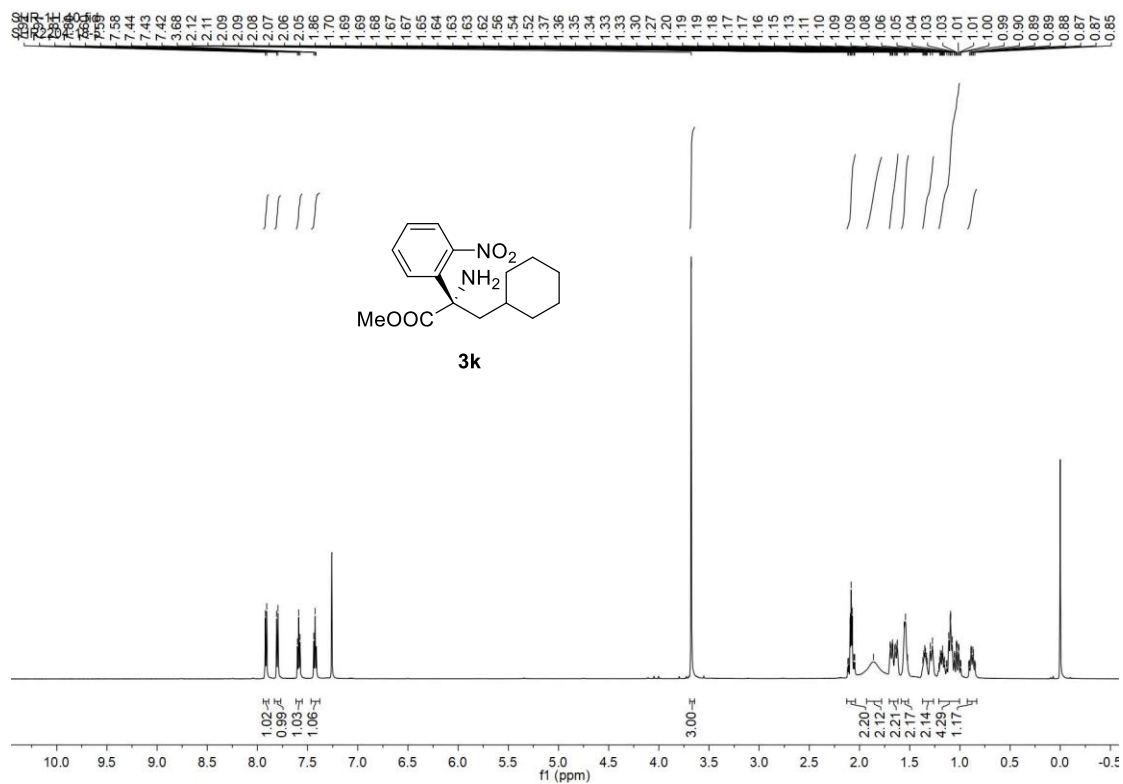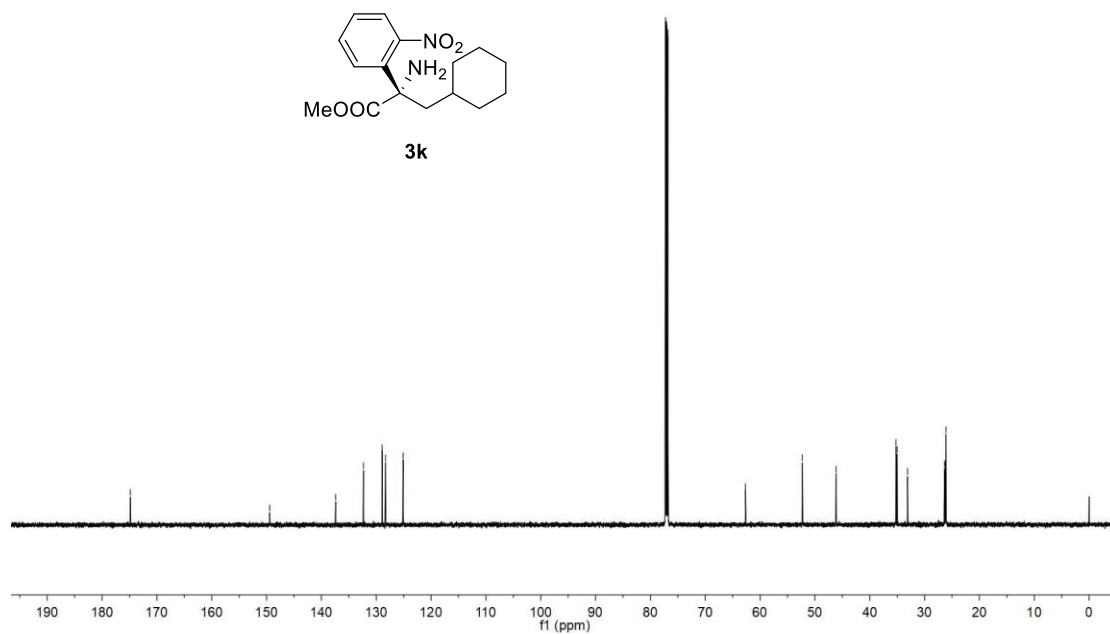

SHR-1H.24.fid  
SHR2204-4-7

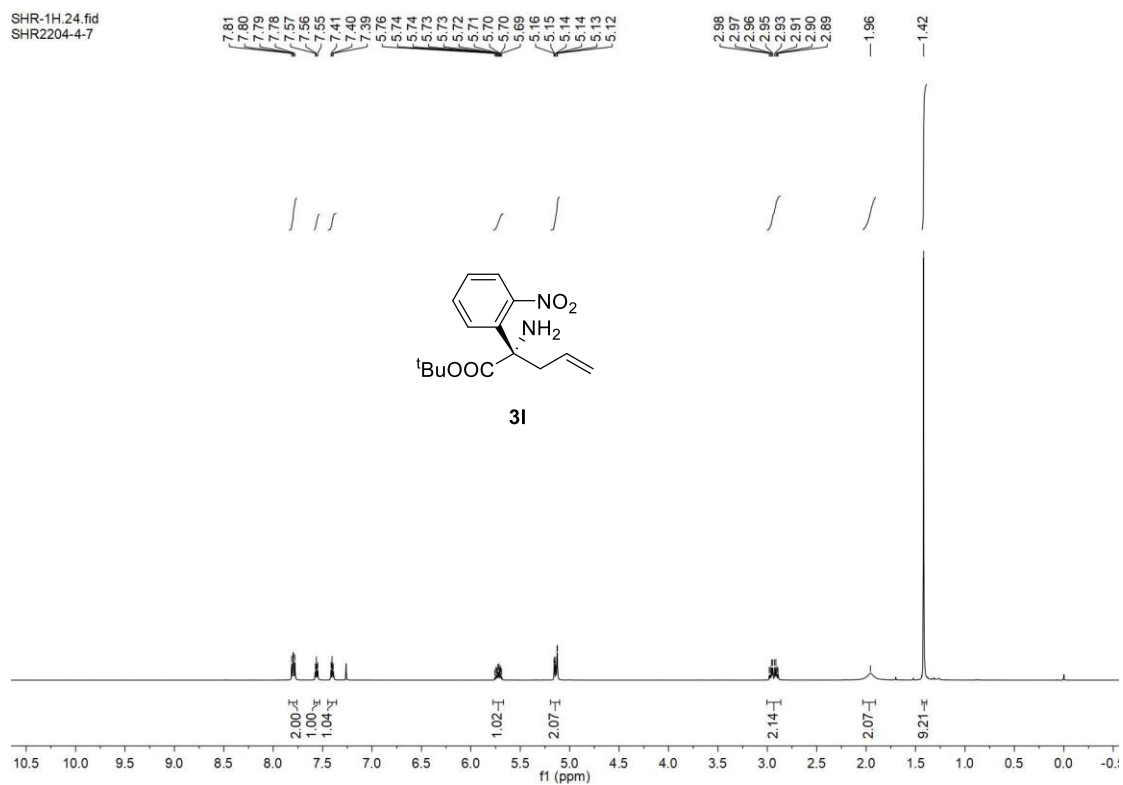

SHR-13C.24.fid  
SHR2204-4-7

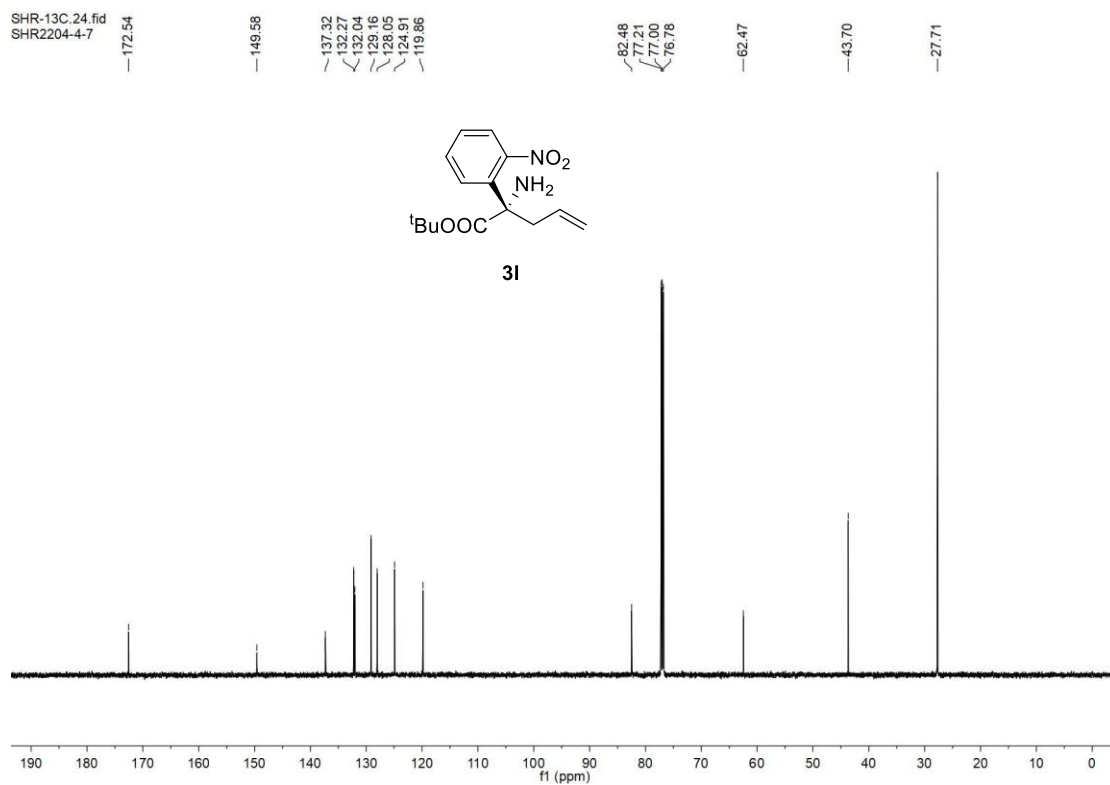



SHR-1H.81.fid  
SHR2204-6-1

7.89  
7.87  
7.84  
7.82  
7.60  
7.58  
7.57  
7.44  
7.42  
7.31  
7.30  
7.29  
7.27  
7.26  
7.20  
7.18  
7.17  
7.16  
7.14

2.69  
2.68  
2.66  
2.65  
2.63  
2.51  
2.50  
2.49  
2.48  
2.47  
2.46  
2.44  
2.16  
1.45

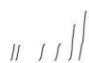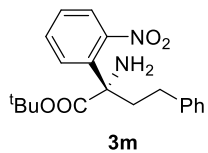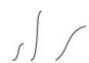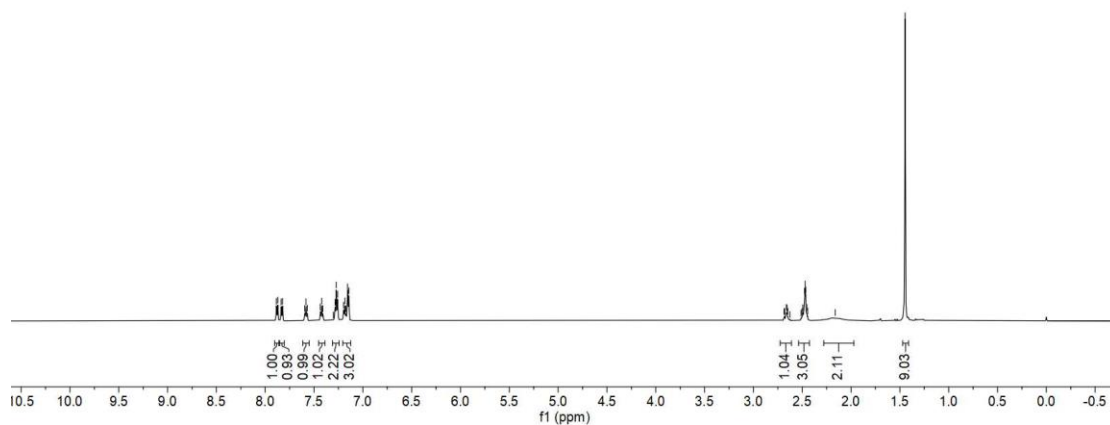

SHR-13C.21.fid  
SHR 2204-6-1

172.86

149.62  
141.41  
136.66  
132.27  
130.16  
128.52  
128.26  
128.17  
126.07  
125.07

82.53  
77.23  
77.02  
76.80

63.09

40.89

30.38  
27.74

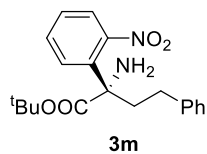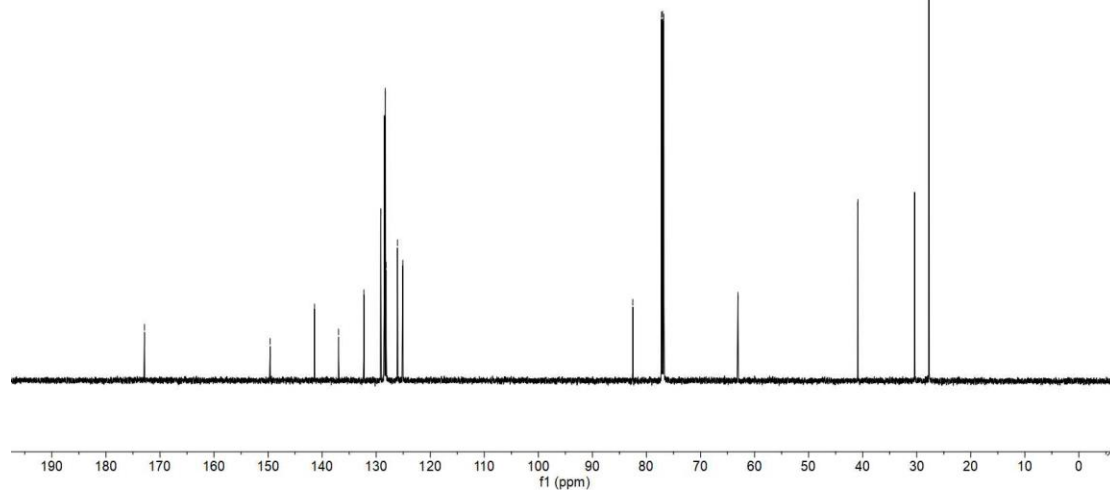

SHR-1H.22.fid  
SHR2204-17-3

7.93  
7.92  
7.86  
7.86  
7.60  
7.59  
7.43  
7.42  
7.41

2.52  
2.51  
2.50  
2.33  
2.32  
2.30  
2.29  
2.28  
2.26  
2.15  
2.14  
2.14  
2.12  
2.11  
1.80  
1.42  
1.41

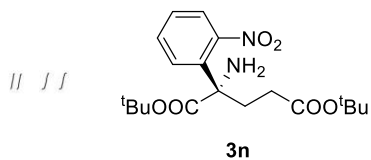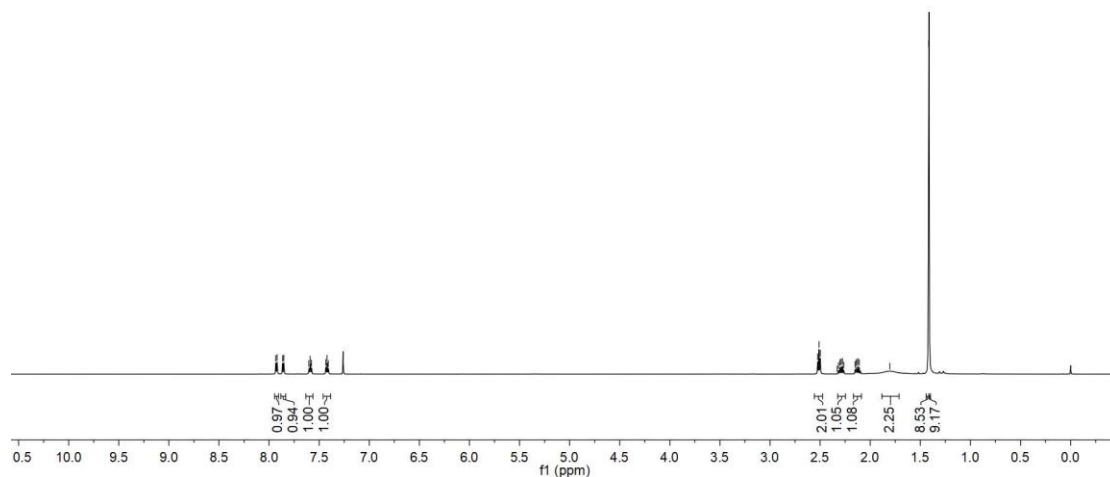

SHR-13C.22.fid  
SHR2204-17-3

172.46  
149.37

136.74  
132.42  
128.20  
128.18  
123.16

82.44  
80.46  
77.20  
76.99  
76.77

62.68

33.35  
30.41  
28.06  
27.65

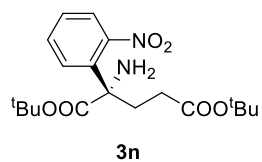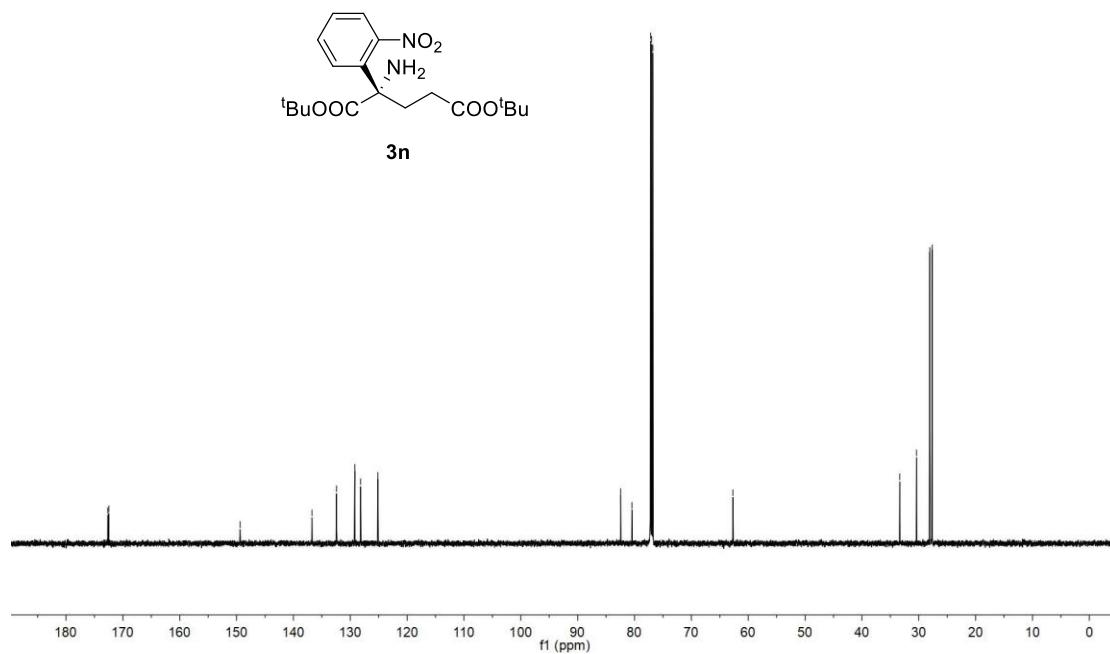

SHR-1H.3.fid  
SHR2207-12-2

7.92  
7.90  
7.77  
7.76  
7.59  
7.58  
7.56  
7.46  
7.45

4.21  
4.20  
4.19  
4.18  
4.13  
4.12  
4.11  
4.10  
3.27  
3.24  
3.13  
3.10  
-2.61

1.25  
1.24  
1.22  
1.21  
1.20

|||

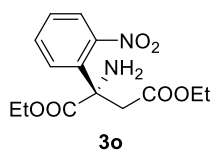

||

||

~

|||

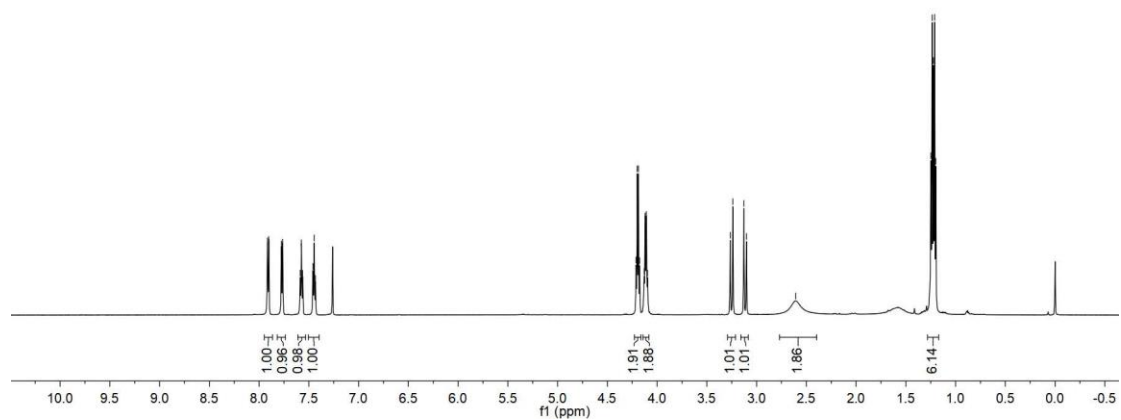

SHR-13C.26.fid  
SHR2207-12-2

172.73  
170.80

149.24

136.29  
132.22  
128.80  
128.77  
124.94

77.20  
76.99  
76.78

62.20  
61.95  
60.75

42.76

14.03  
13.84

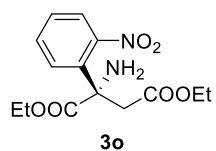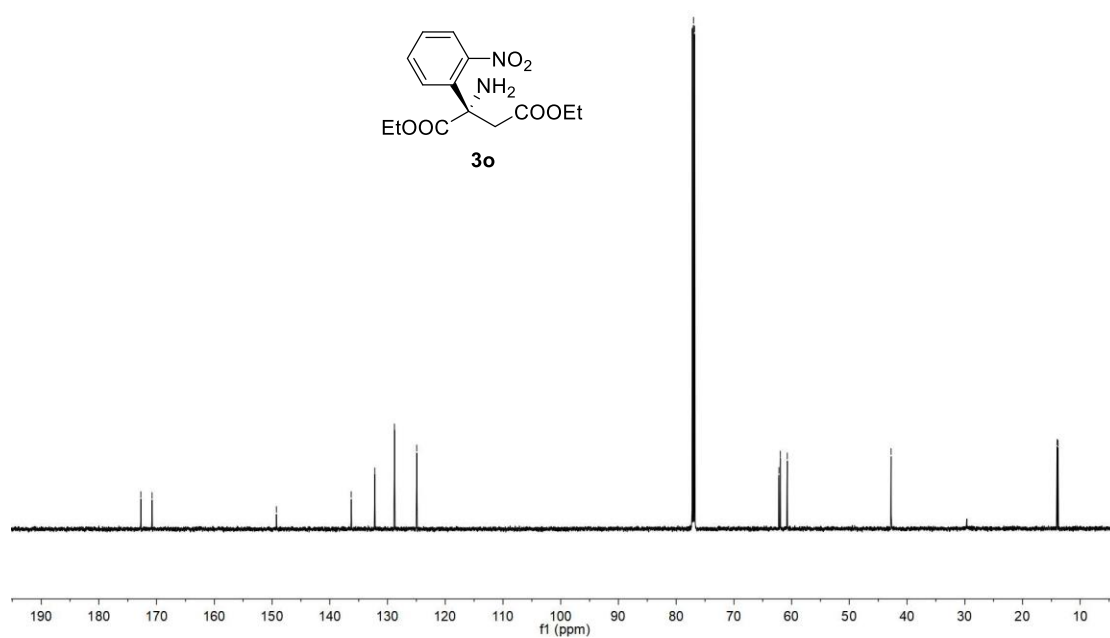

SHR-1H.49.fid  
SHR2205-16-3

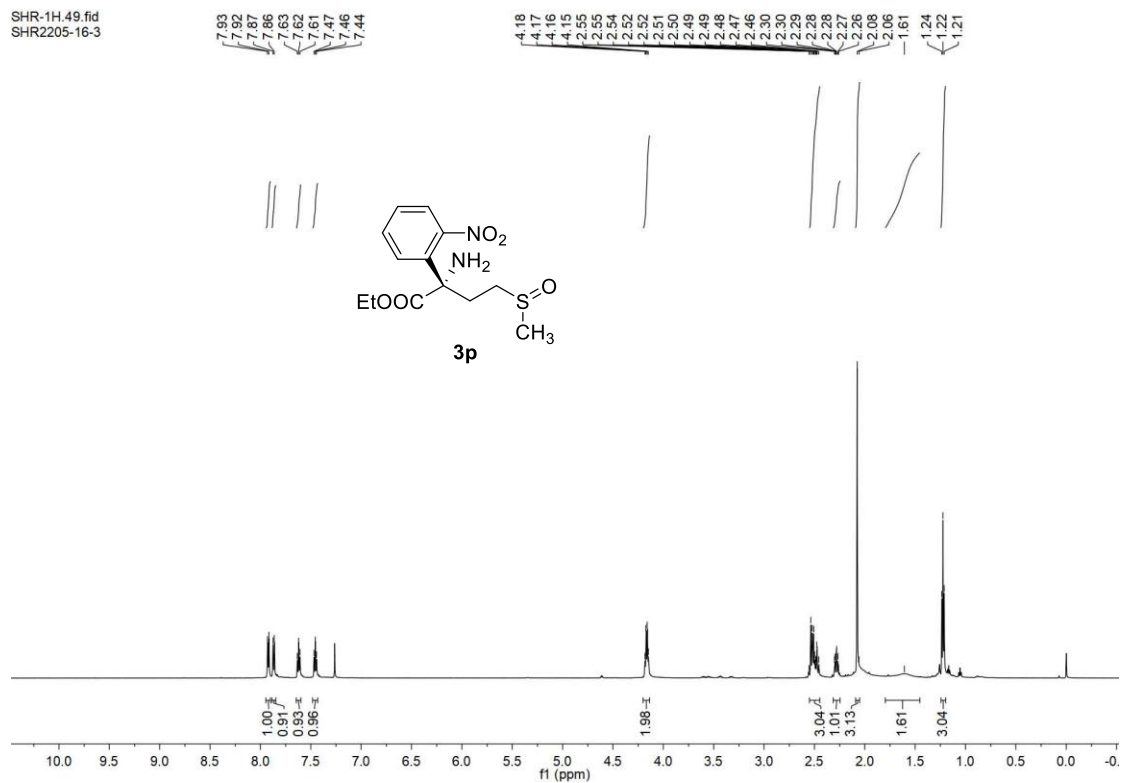

SHR-13C.49.fid  
SHR2205-16-3

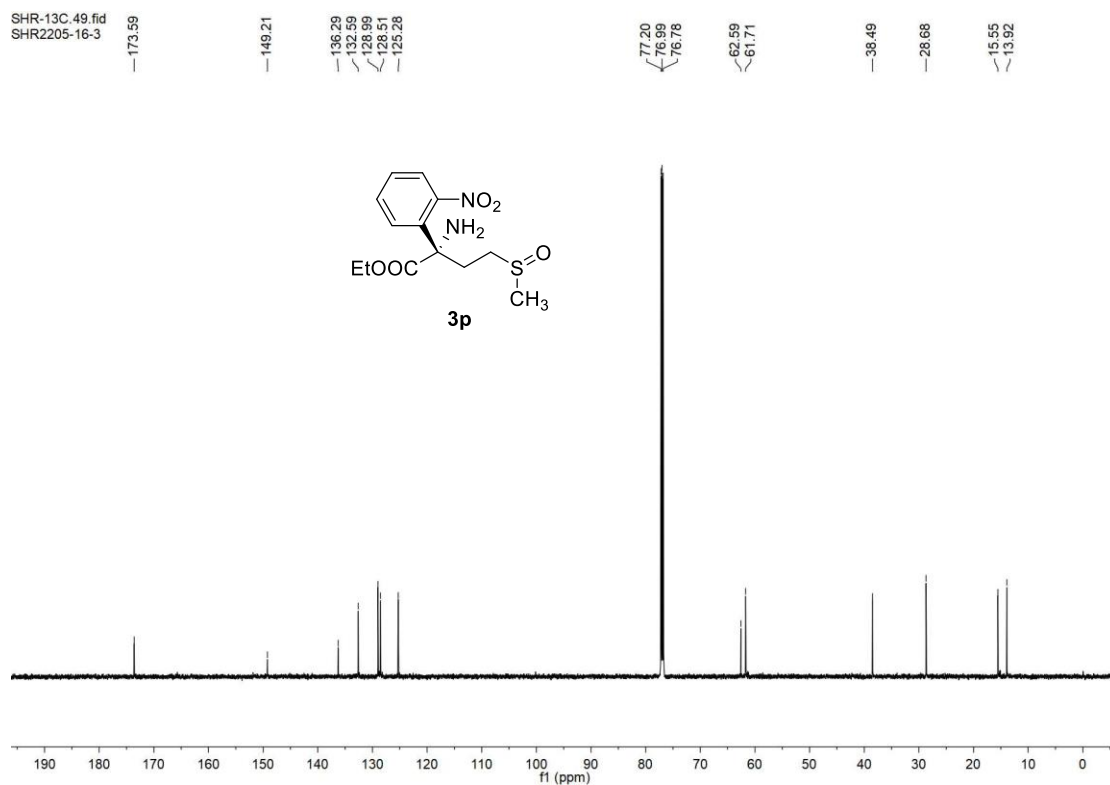

SHR-1H.29.fid  
SHR2204-27-1

7.69  
7.68  
7.67  
7.53  
7.51  
7.50  
7.39  
7.38  
7.37

3.92  
3.91  
3.84  
3.82

-2.01  
-1.44  
-1.18

|||

||

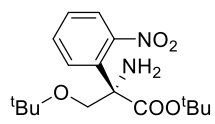

**3q**

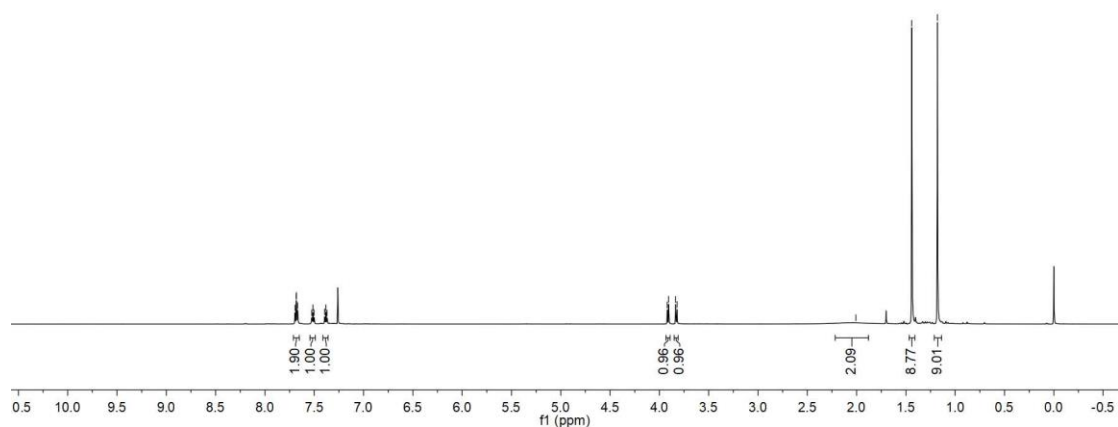

SHR-13C.7.fid  
SHR2204-27-1

171.79

150.11

135.95

131.55

129.47

128.06

124.69

82.39

77.24

77.04

76.82

73.66

67.09

63.65

28.45

27.81

27.45

-0.00

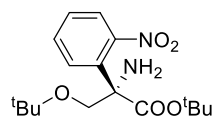

**3q**

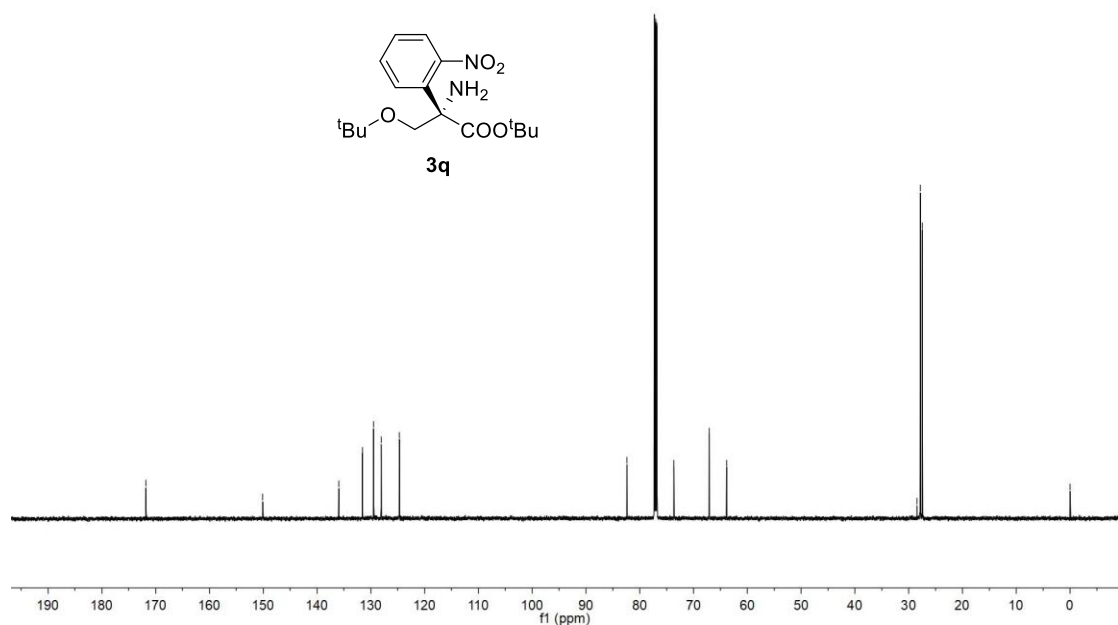

SHR-1H.2.fid  
SHR 05-31-3

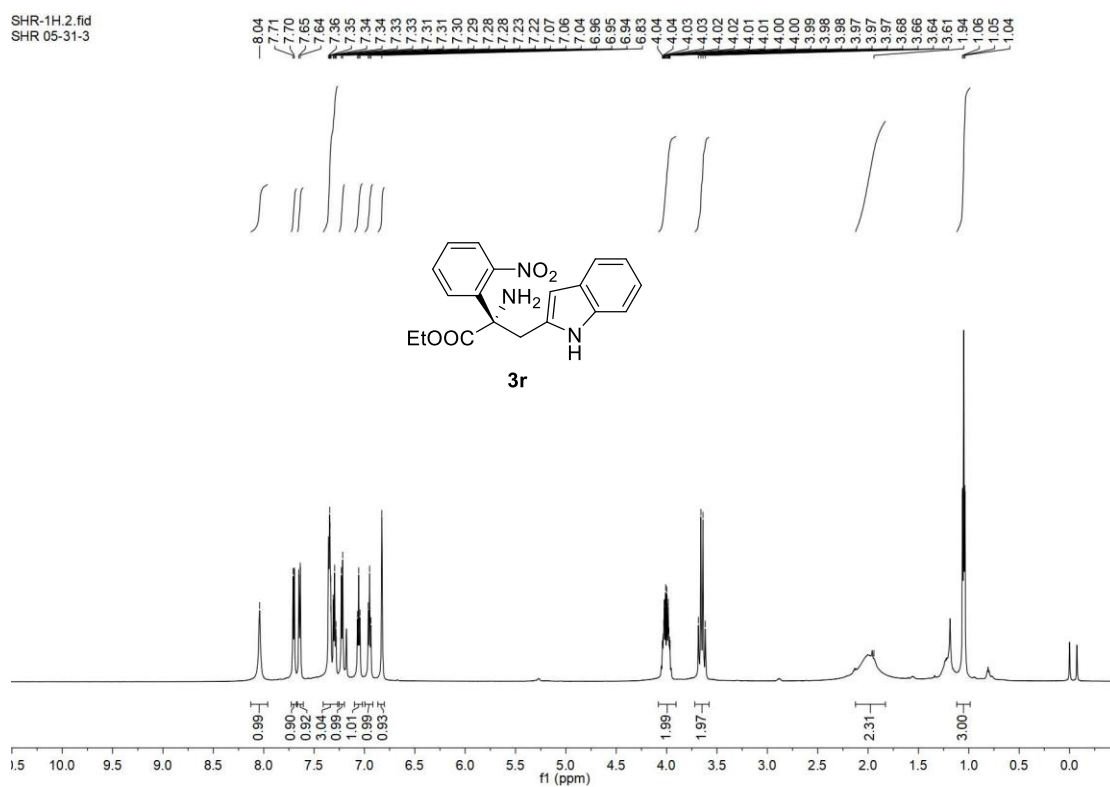

SHR-13C.45.fid  
SHR 05-31-3

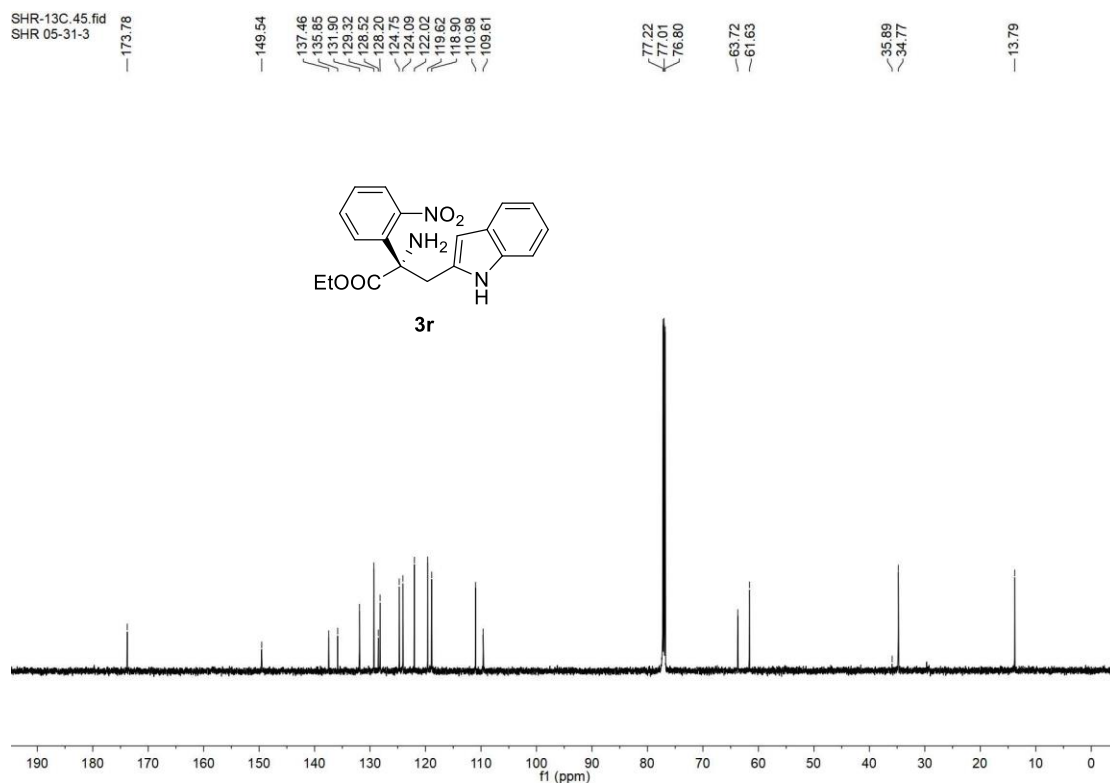

SHR-1H.42.fid  
SHR2204-29-1

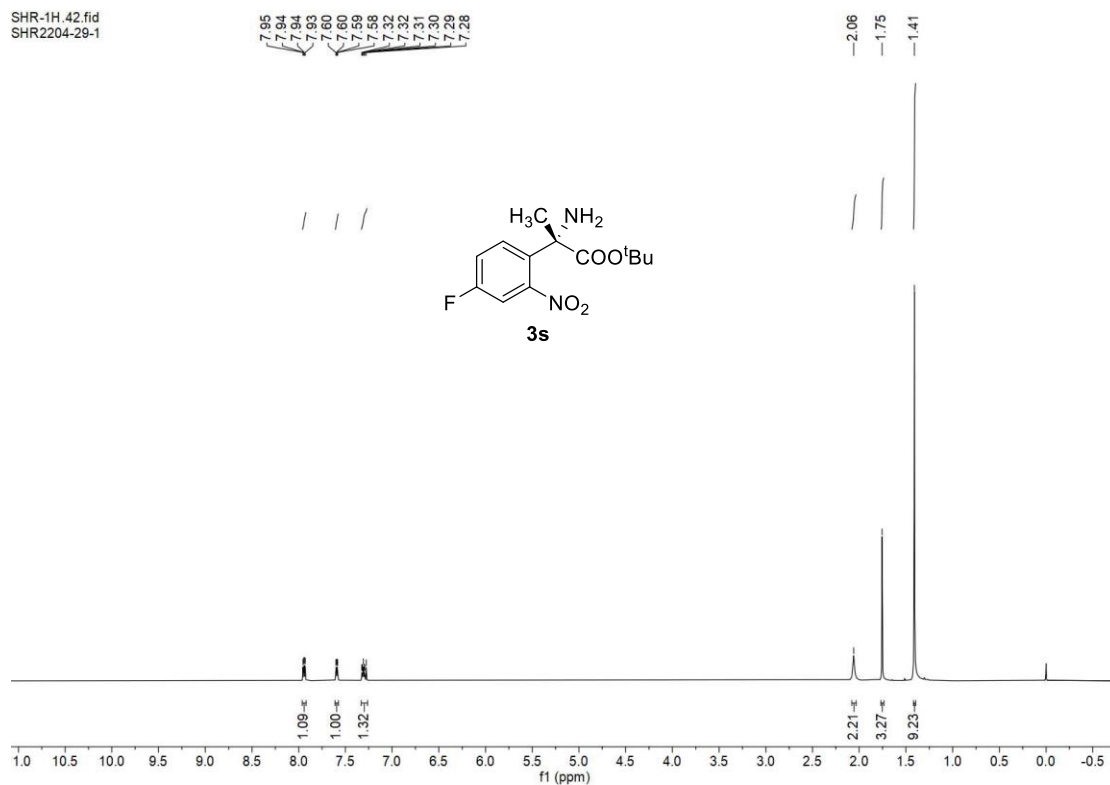

SHR-13C.13.fid  
SHR2204-29-1

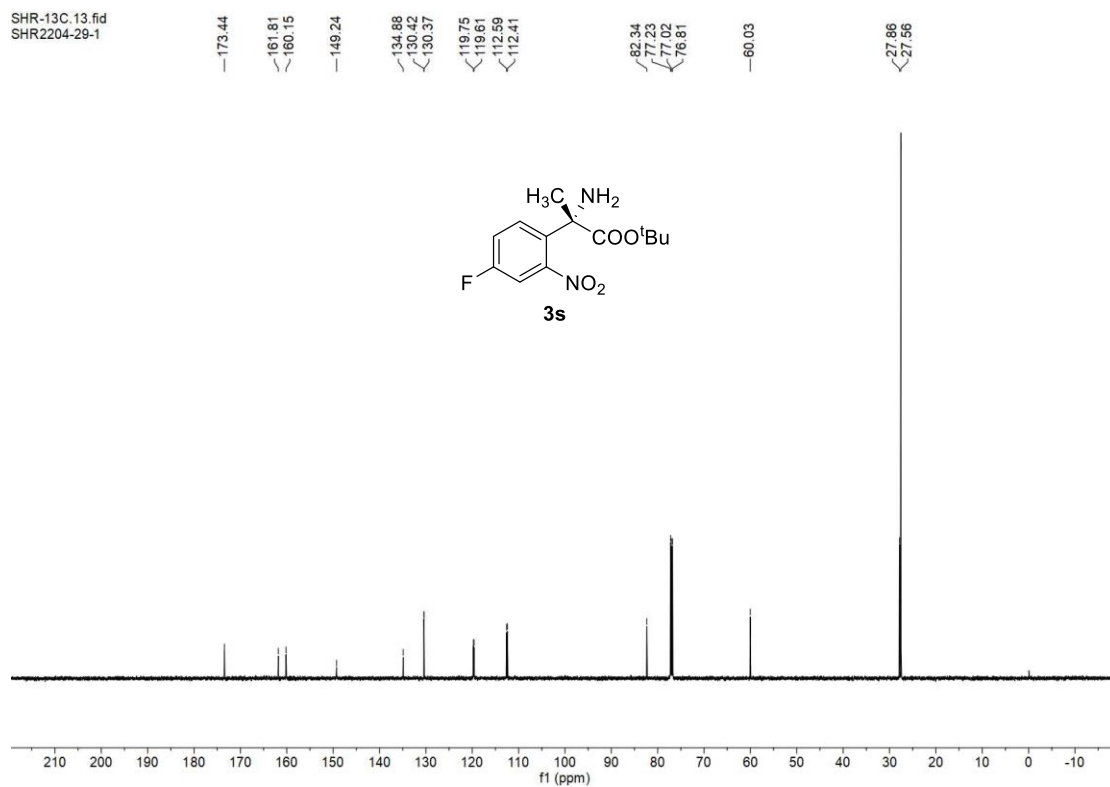

SHR-1H.18.fid  
SHR2205-6-7

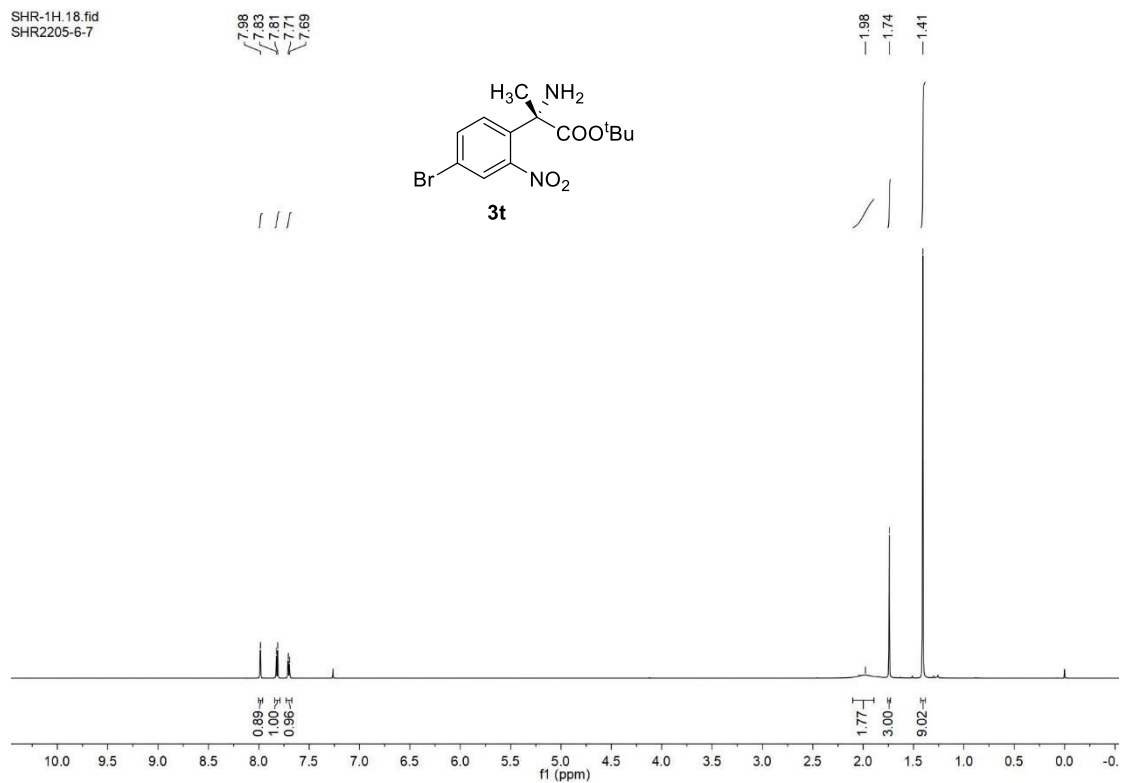

SHR-13C.5.fid  
SHR2205-6-7

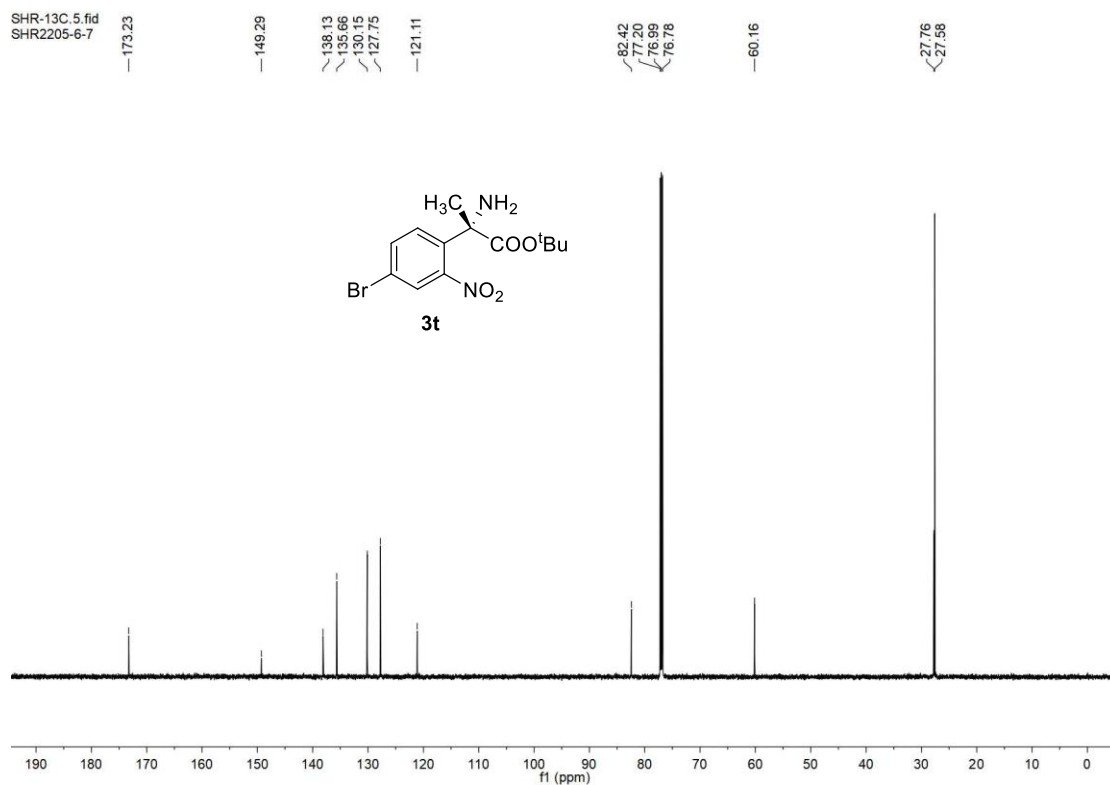



SHR-1H.43.fid  
SHR2205-6-8

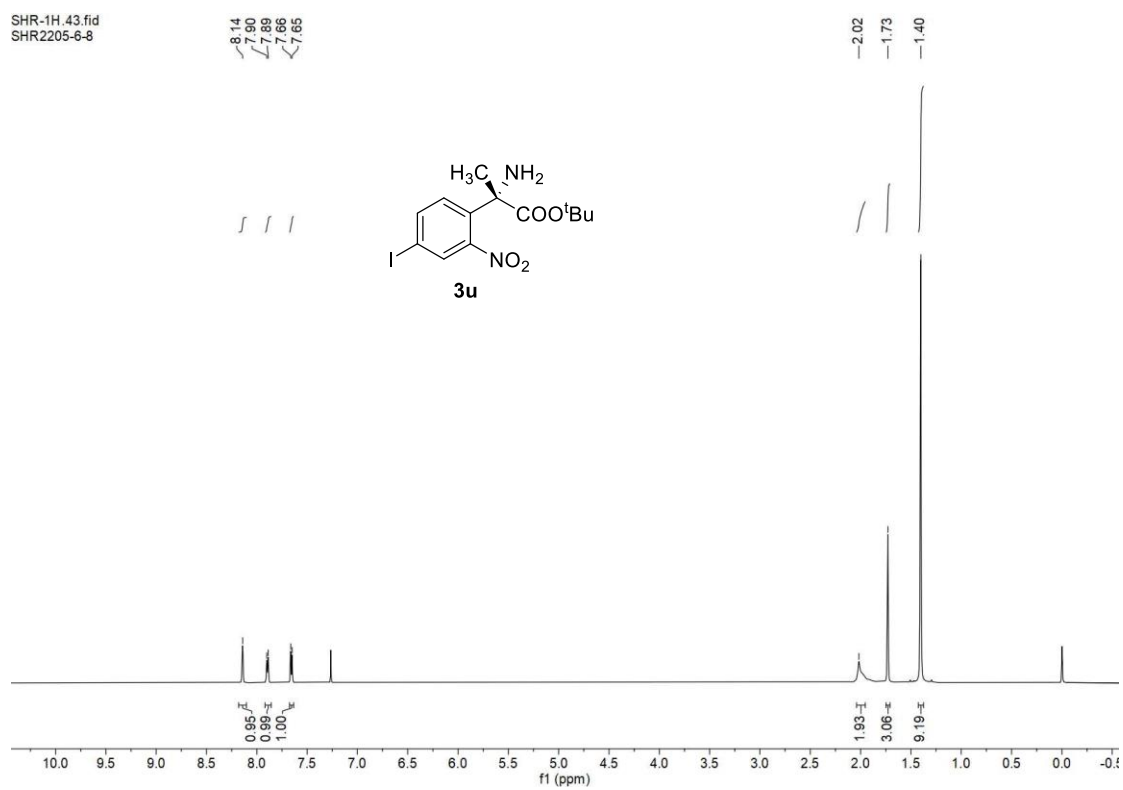

SHR-13C.14.fid  
SHR2205-6-8

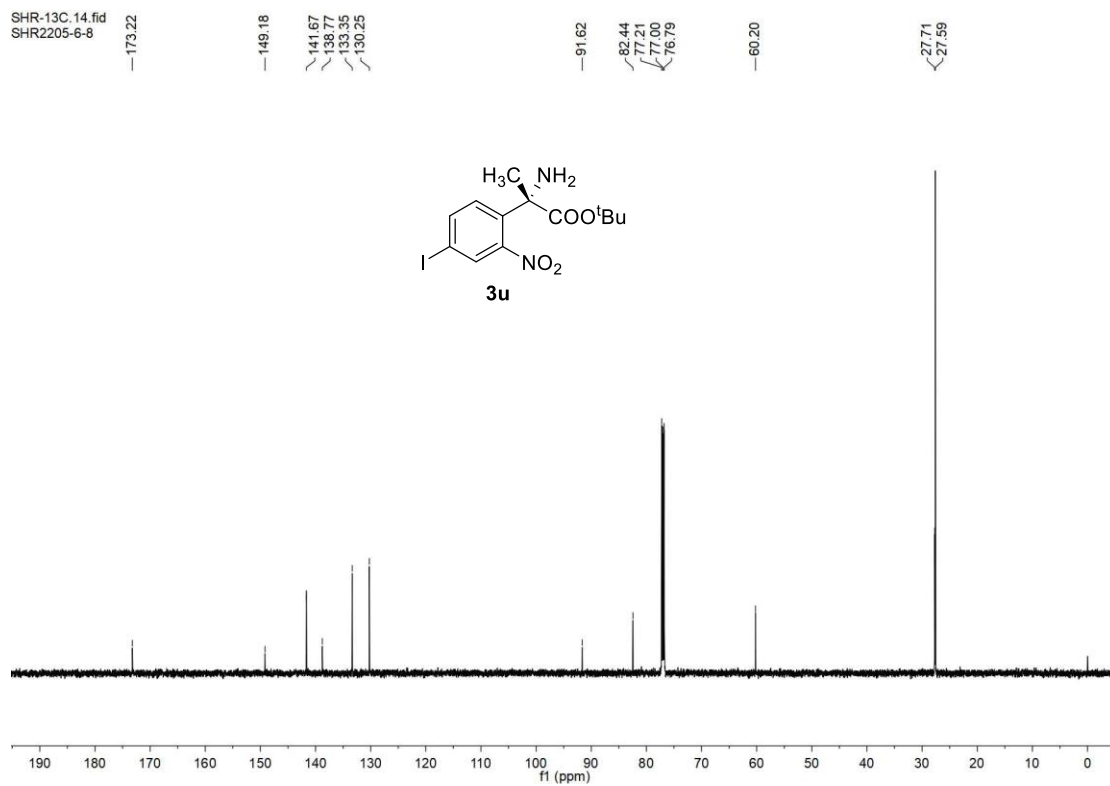

SHR-1H.80.fid  
SHR2205-26-3

7.76  
7.75  
7.68  
7.40  
7.38

2.41  
1.97  
1.74  
1.40

|| |

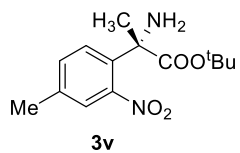

SHR-13C.20.fid  
SHR2205-26-3

174.03

148.62

138.44

135.86

133.52

128.29

125.35

81.99

77.21

76.99

76.78

60.04

27.86

27.59

20.53

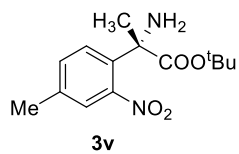

210 200 190 180 170 160 150 140 130 120 110 100 90 80 70 60 50 40 30 20 10 0 -10  
f1 (ppm)

SHR-1H.83.fid  
SHR2204-29-2

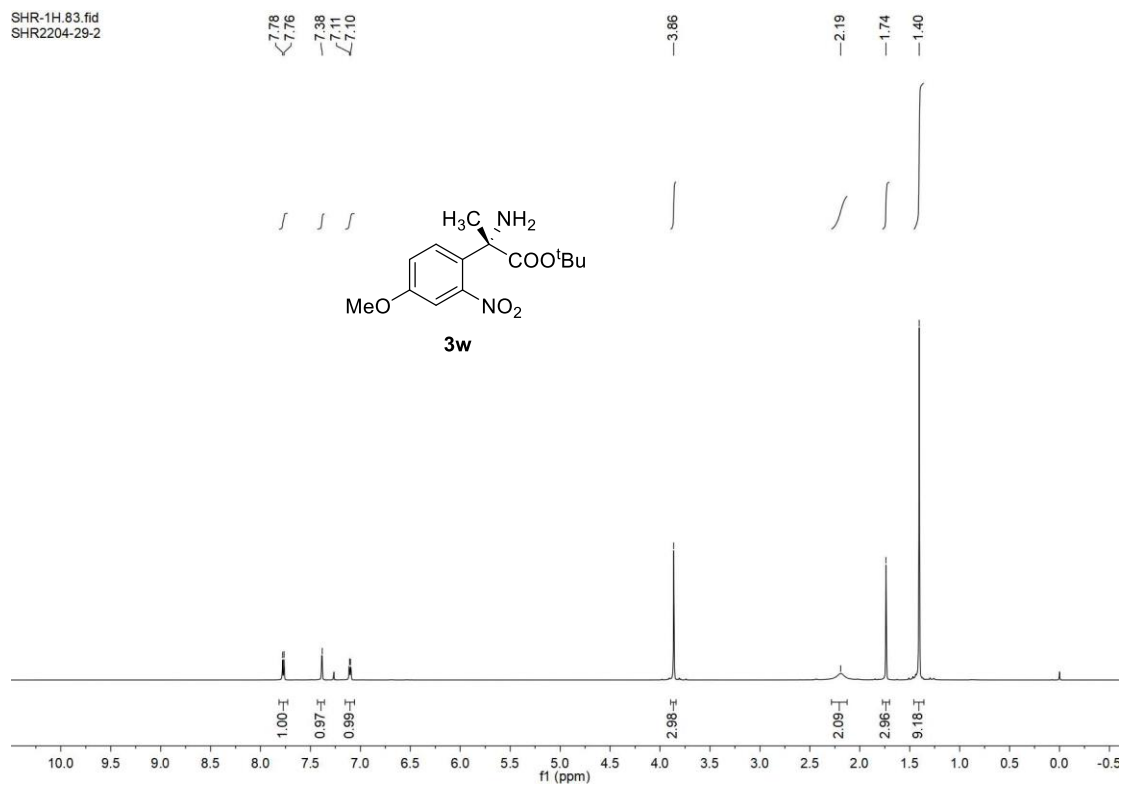

SHR-13C.22.fid  
SHR 2204-29-2

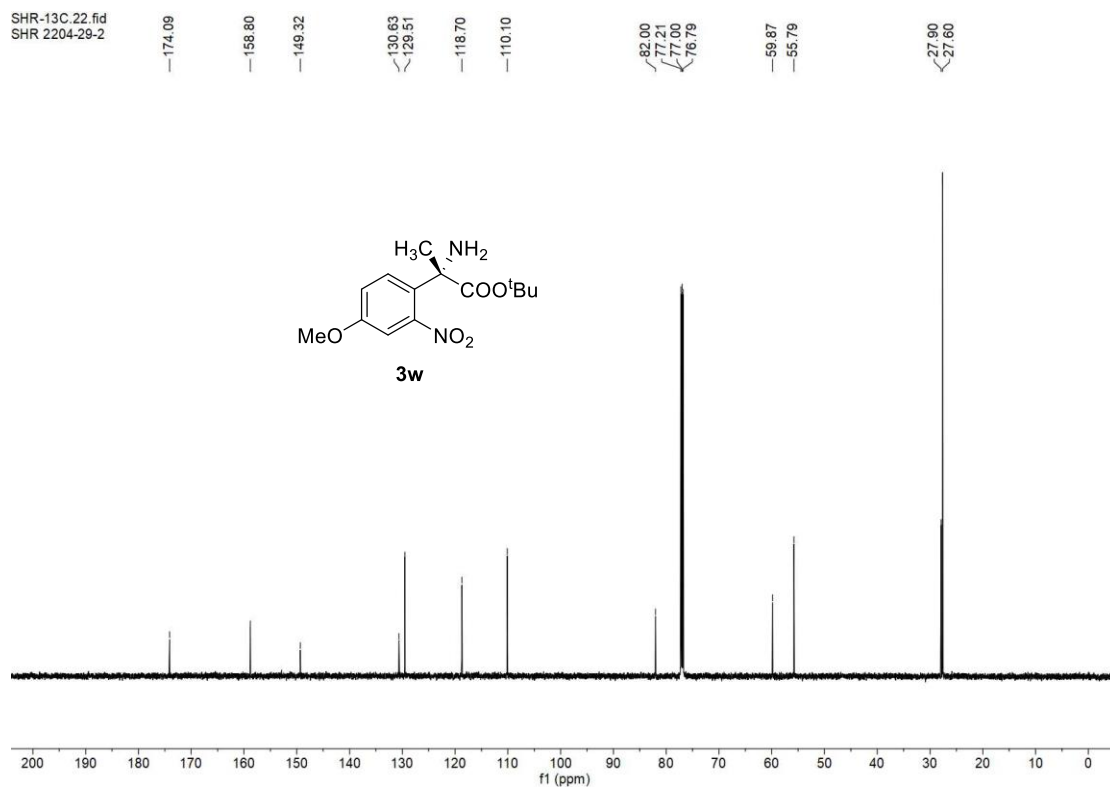

SHR-1H.98.fid  
SHR2206-3-2

8.09  
7.97  
7.95  
7.81  
7.80  
7.62  
7.60  
7.49  
7.48  
7.46  
7.42  
7.41  
7.40

2.04  
1.80  
1.43

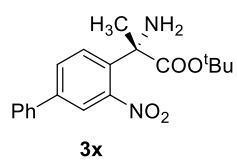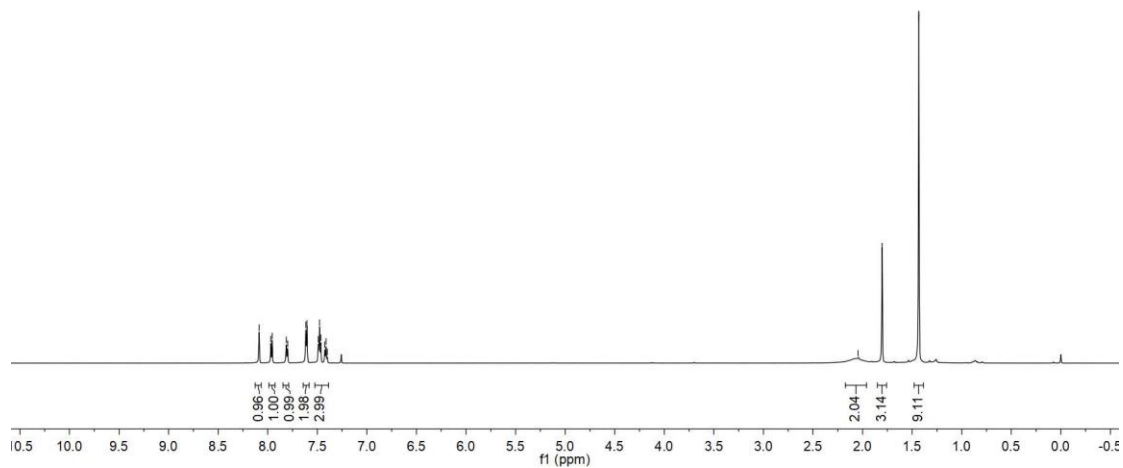

SHR-13C.42.fid  
SHR2206-3-2

173.85

149.20

141.38

138.22

137.49

130.97

129.10

129.01

128.45

126.99

123.35

82.19

60.20

27.90

27.64

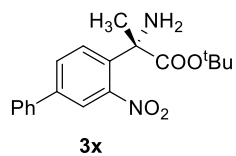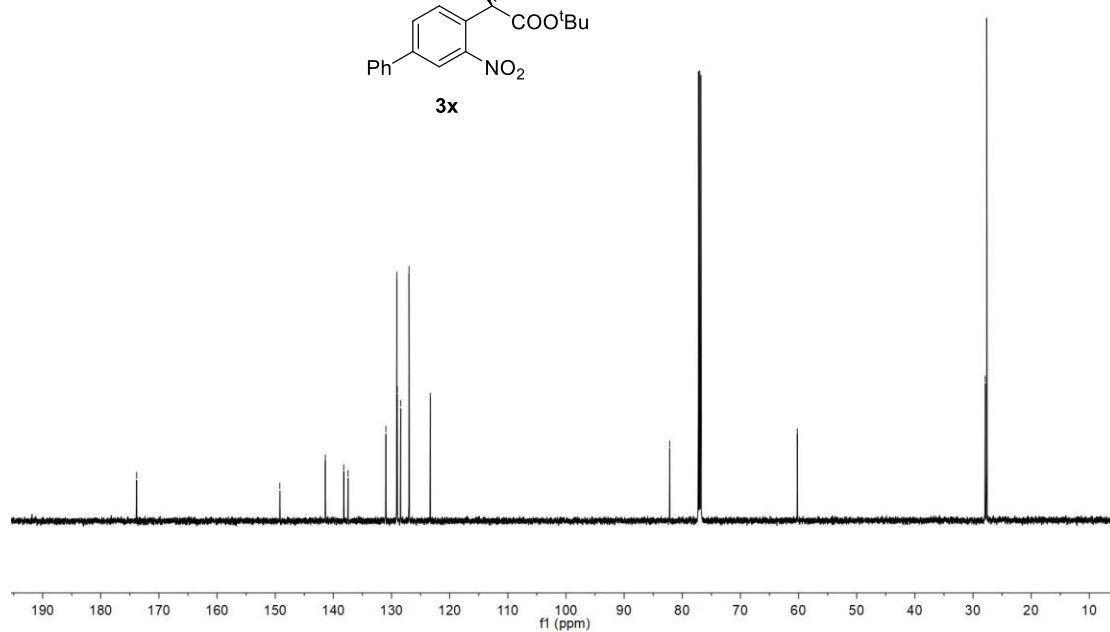

SHR-1H.41.fid  
SHR2205-26-4

8.03  
8.03  
7.97  
7.96  
7.76  
7.76  
7.75  
7.59  
7.57  
7.38  
7.17  
7.15

-2.08  
-1.80  
-1.43

||| |

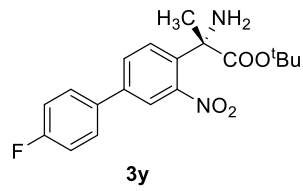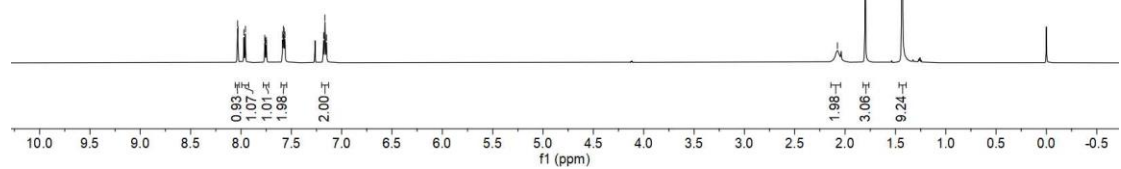

SHR-13C.16.fid  
SHR2205-26-4

-173.69  
-163.63  
-162.29  
-149.20  
-140.40  
-137.36  
-134.32  
-130.84  
-129.17  
-128.74  
-128.69  
-123.18  
-116.17  
-116.02

-82.31  
-77.22  
-77.01  
-76.80

-60.18

-27.80  
-27.62

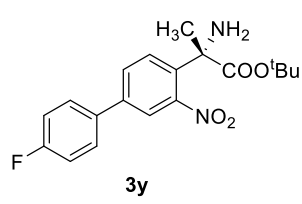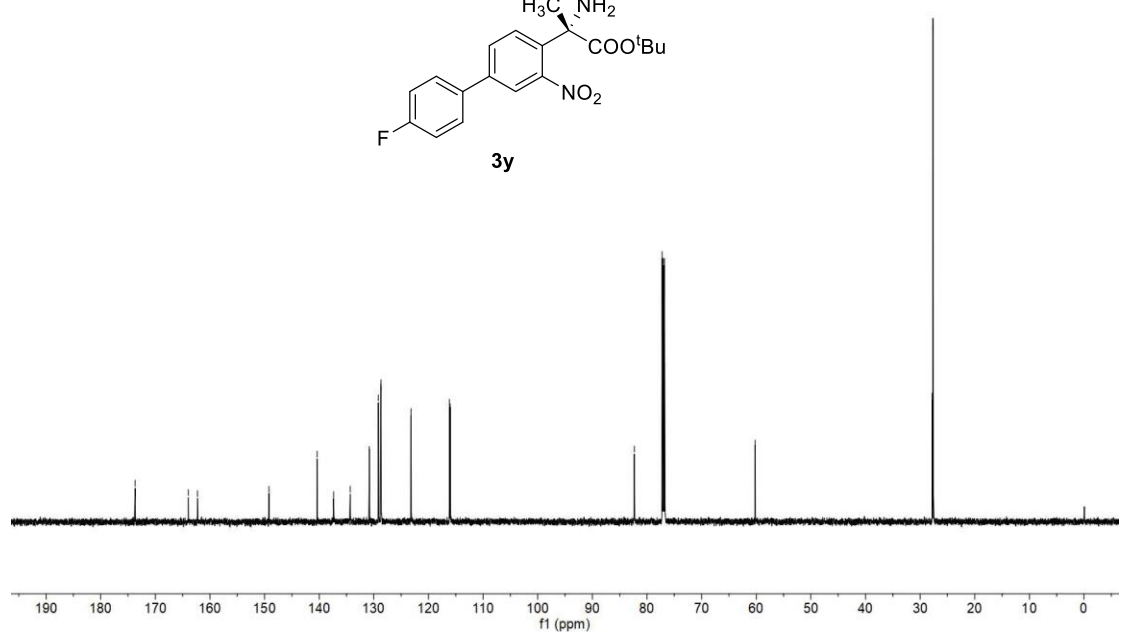

SHR-1H.79.fid  
SHR2205-6-6

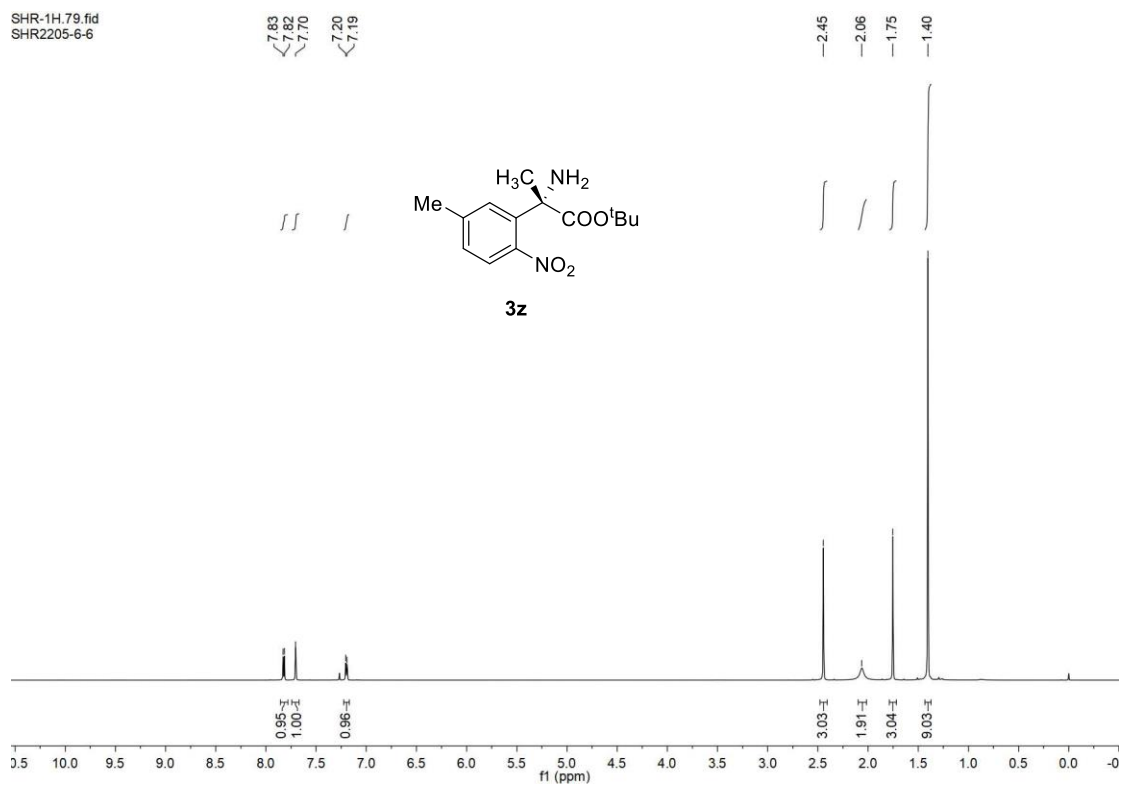

SHR-13C.16.fid  
SHR2205-6-6

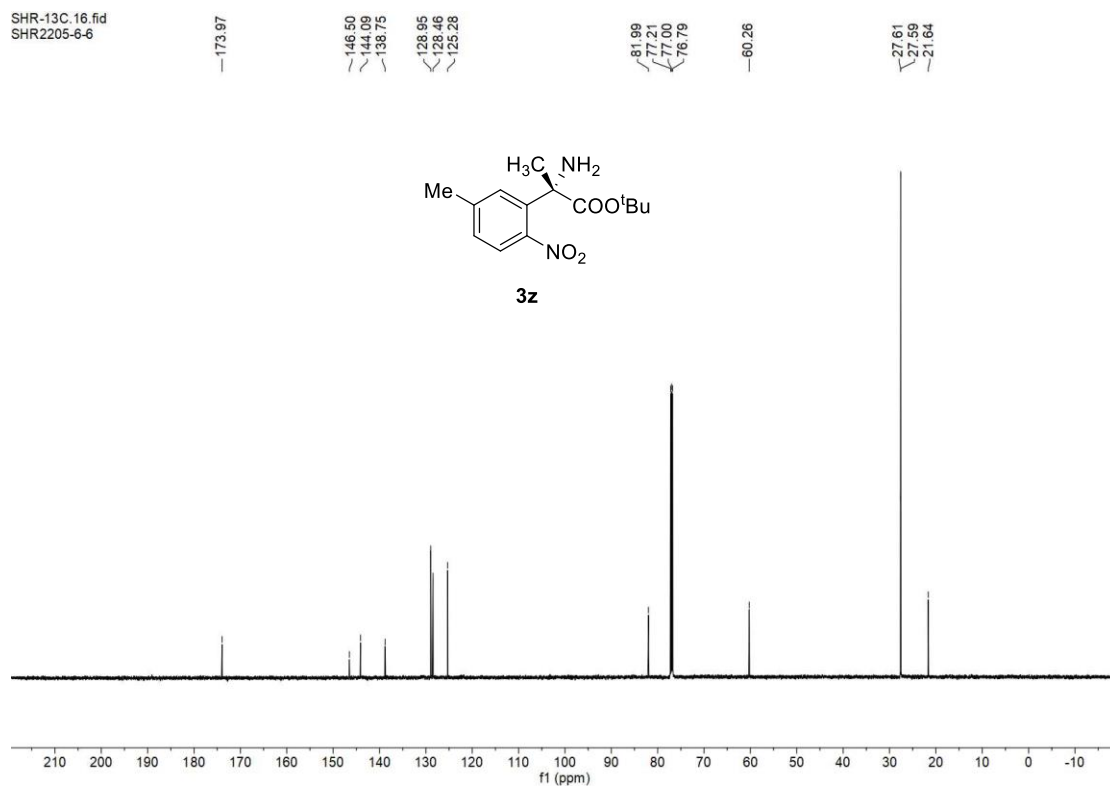

SHR-1H.88.fid  
SHR2204-29-3

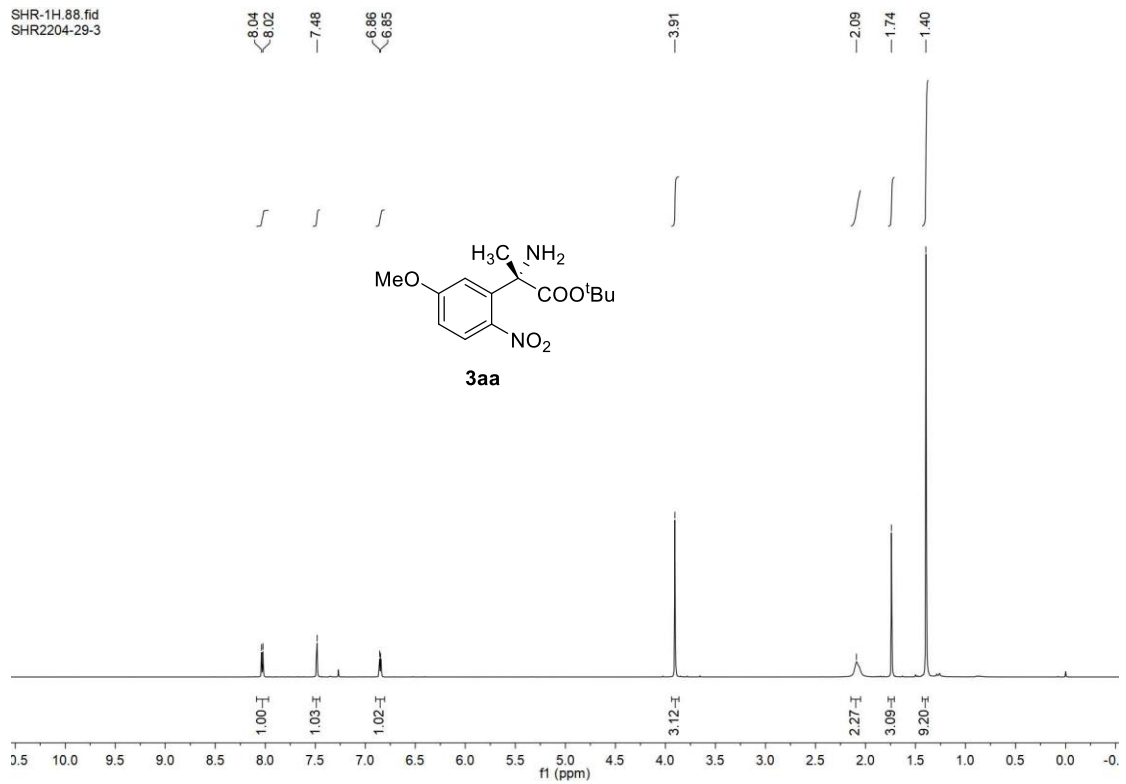

SHR-13C.28.fid  
SHR2204-29-3

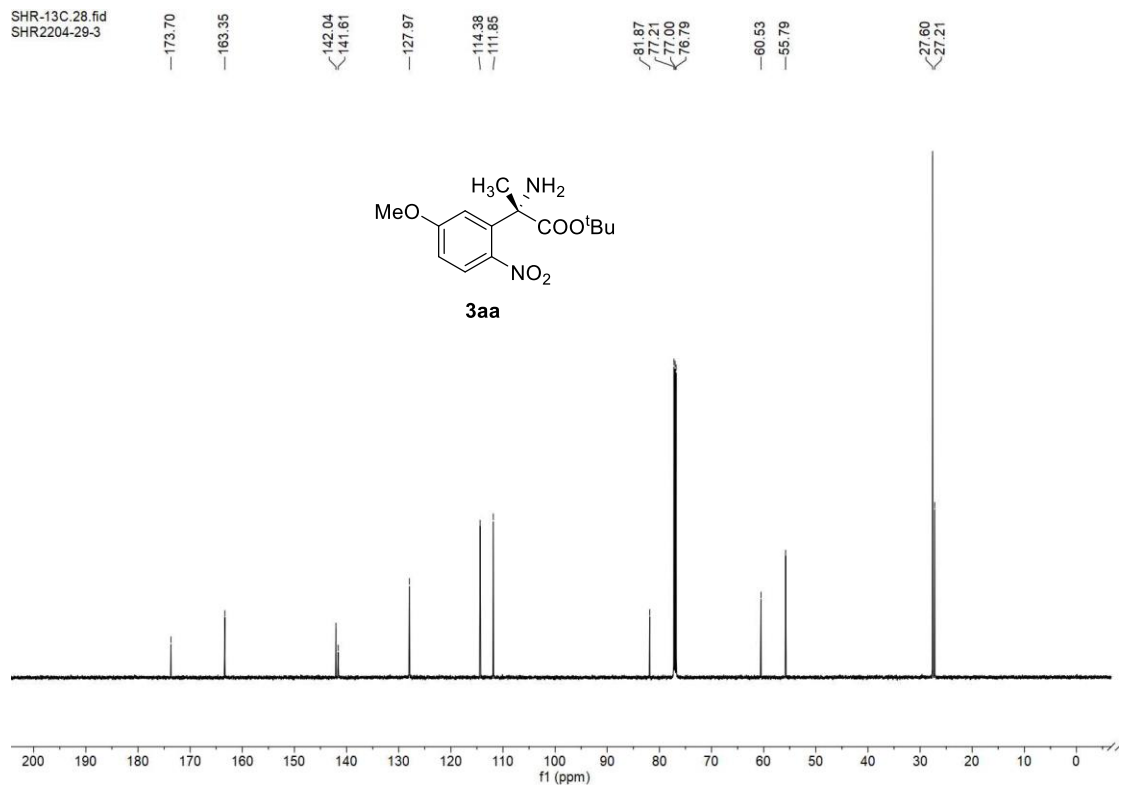

SHR-1H.87.fid  
SHR2206-3-1

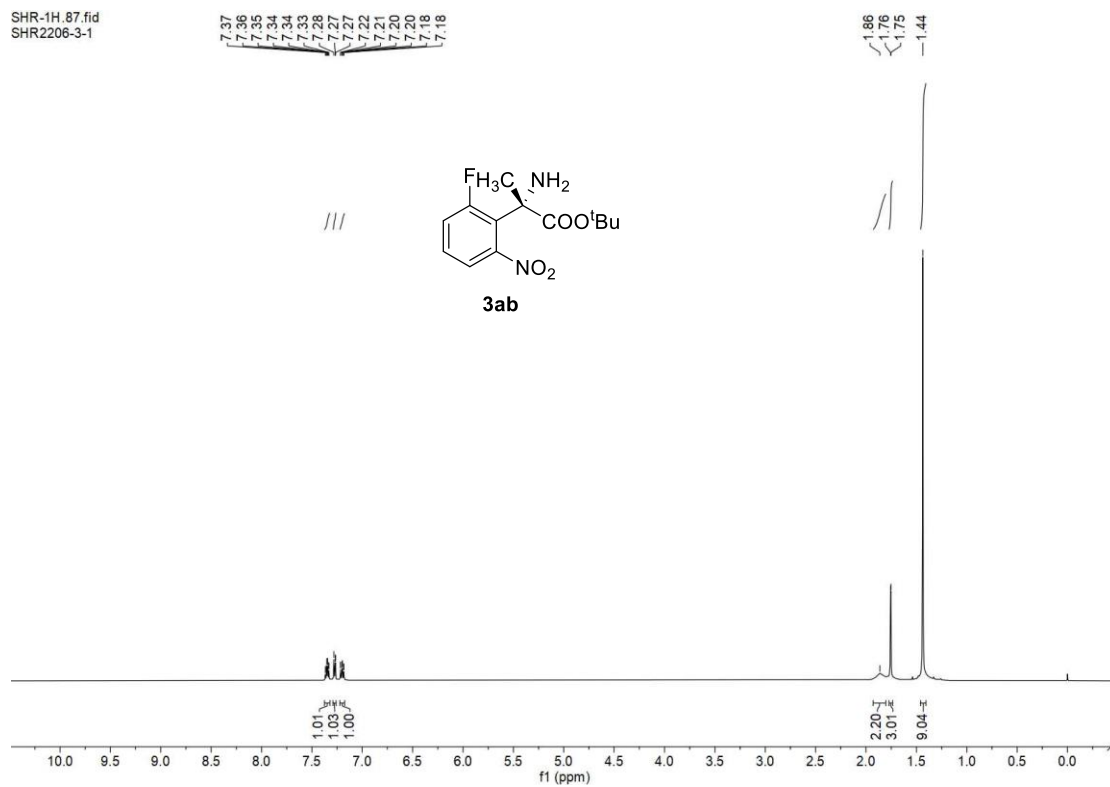

SHR-13C.29.fid  
SHR2206-3-1

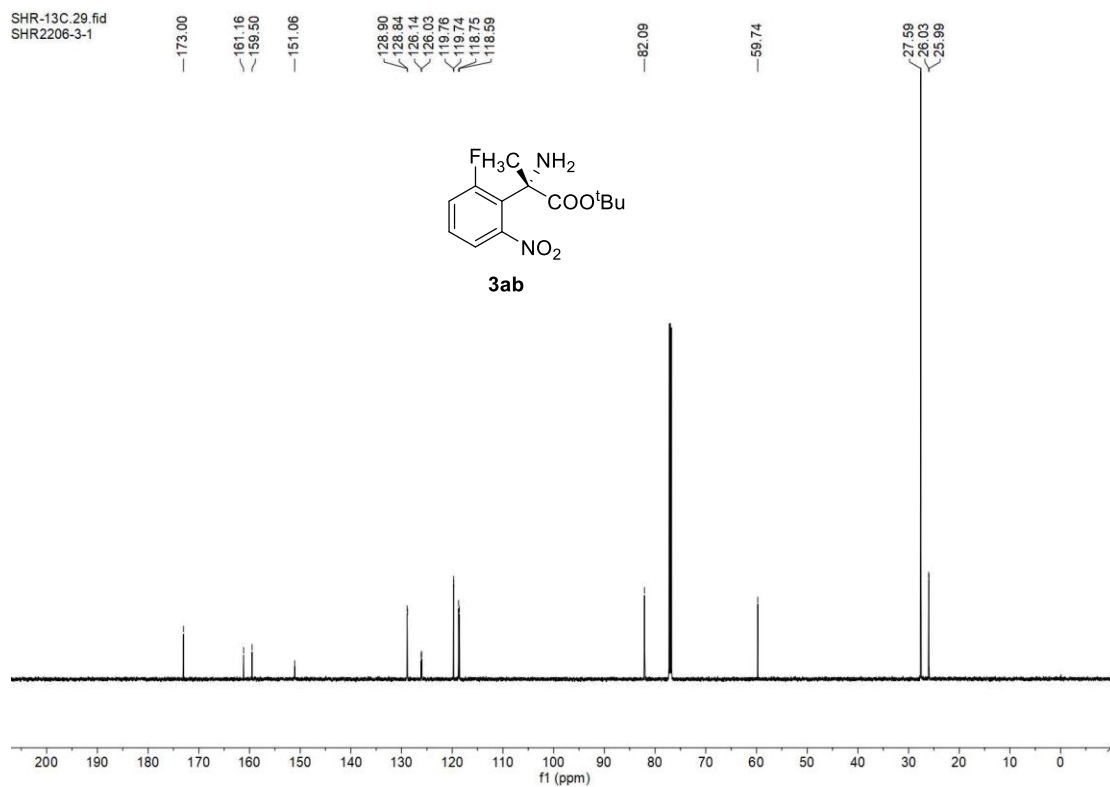



SHR-1H.82.fid  
SHR2205-26-2

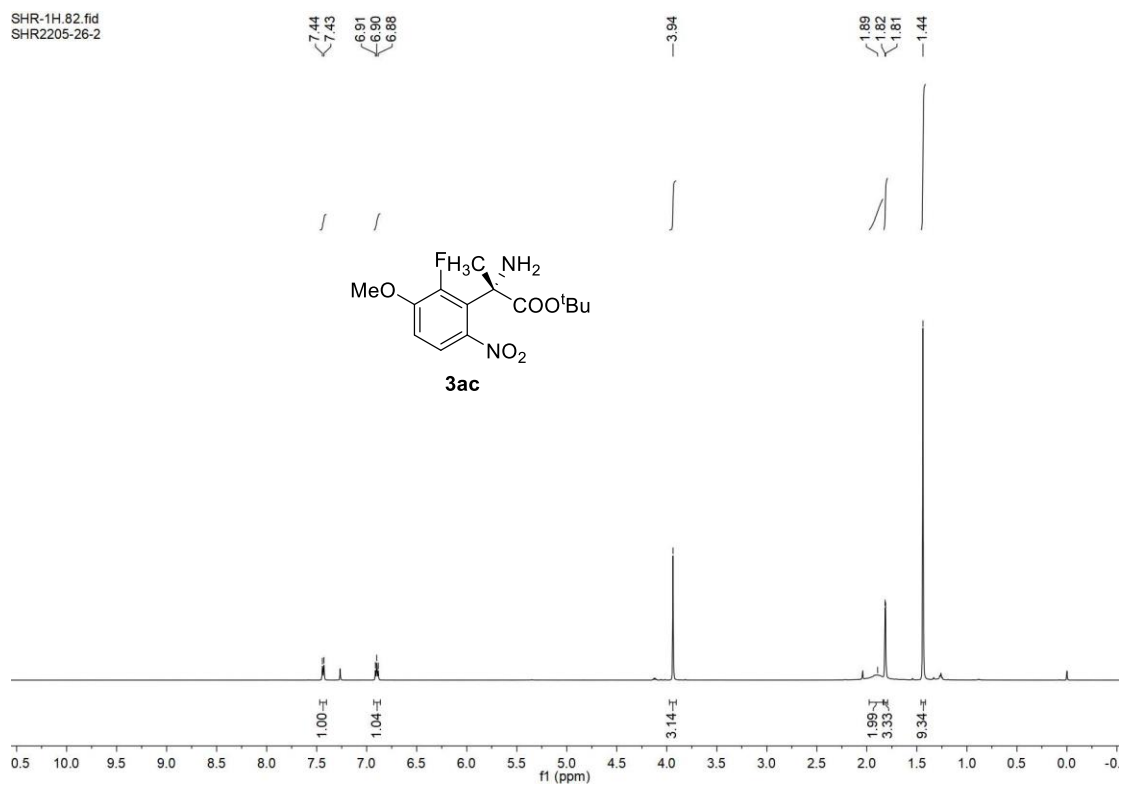

SHR-13C.23.fid  
SHR 2205-26-2

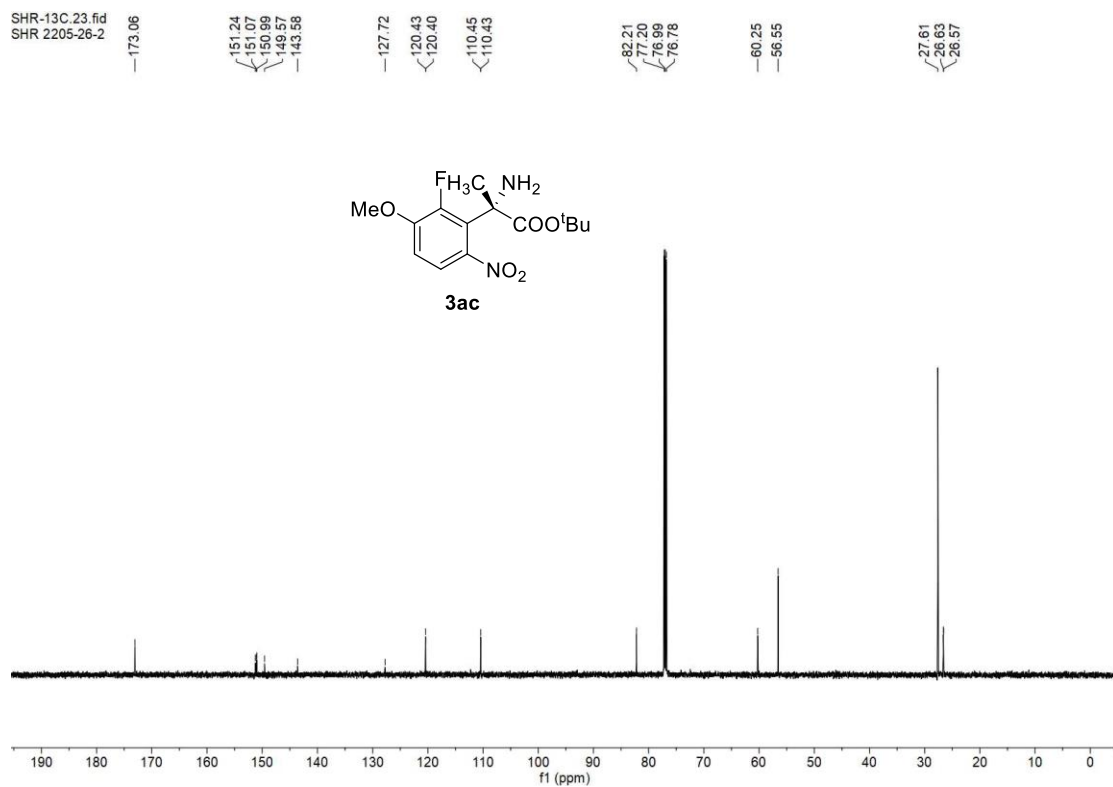

SHR-1H.11.fid  
SHR2205-8-5

7.78  
7.77  
7.61  
7.59

2.36  
2.12  
1.74  
1.40

//

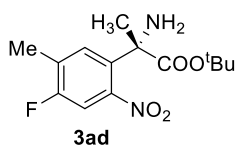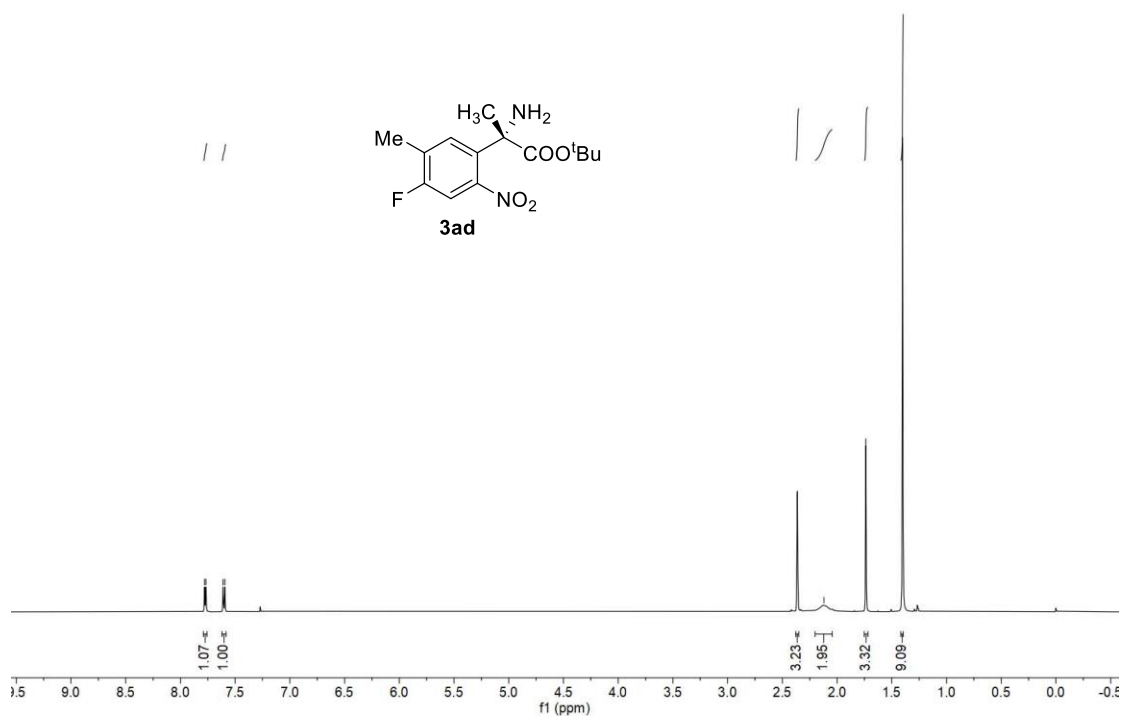

SHR-13C.4.fid  
SHR2205-8-5

173.68  
160.02  
156.37  
146.90  
146.85  
134.66  
134.63  
131.45  
131.42  
130.83  
130.72  
112.38  
112.20  
82.15  
77.21  
77.00  
76.78  
60.03  
27.65  
27.56  
14.81  
14.79

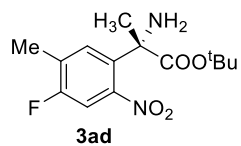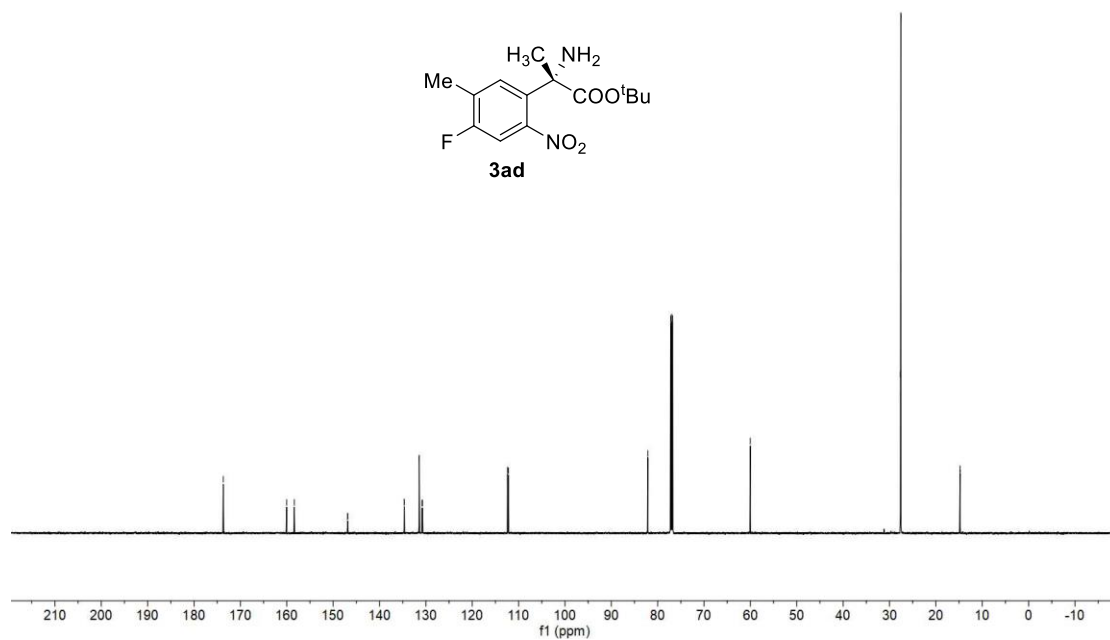

SHR-1H.44.fid  
SHR2205-8-6

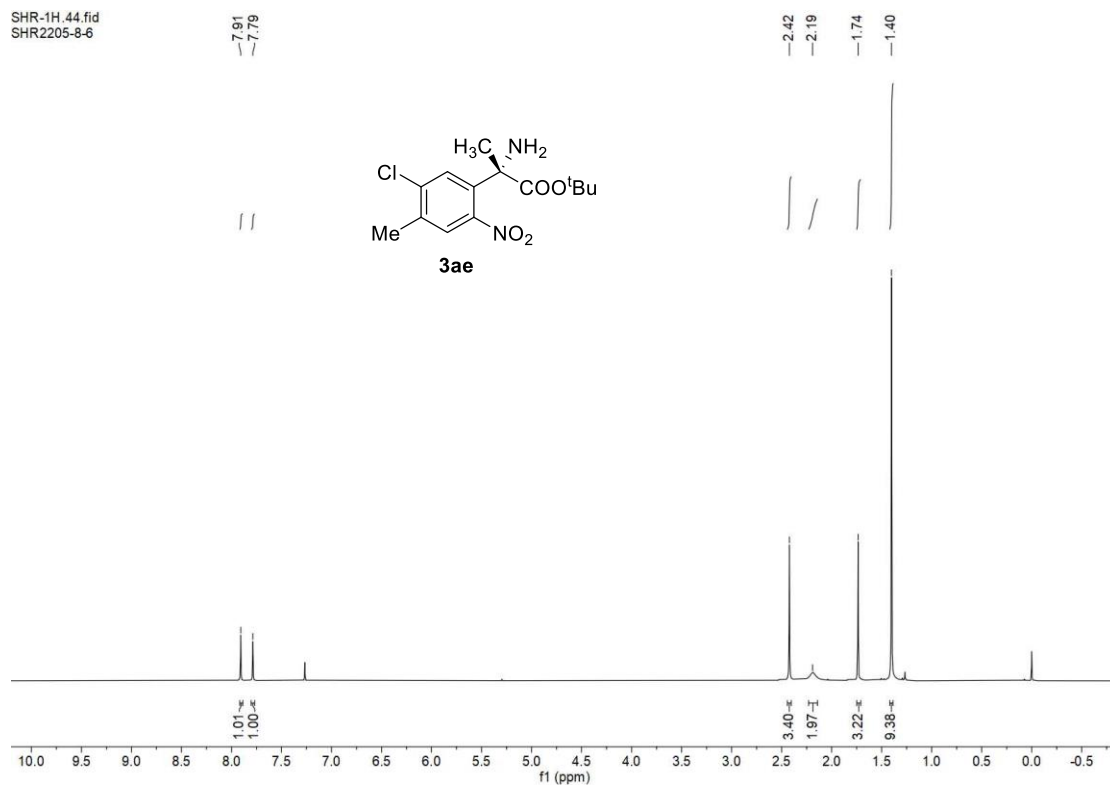

SHR-13C.15.fid  
SHR2205-8-6

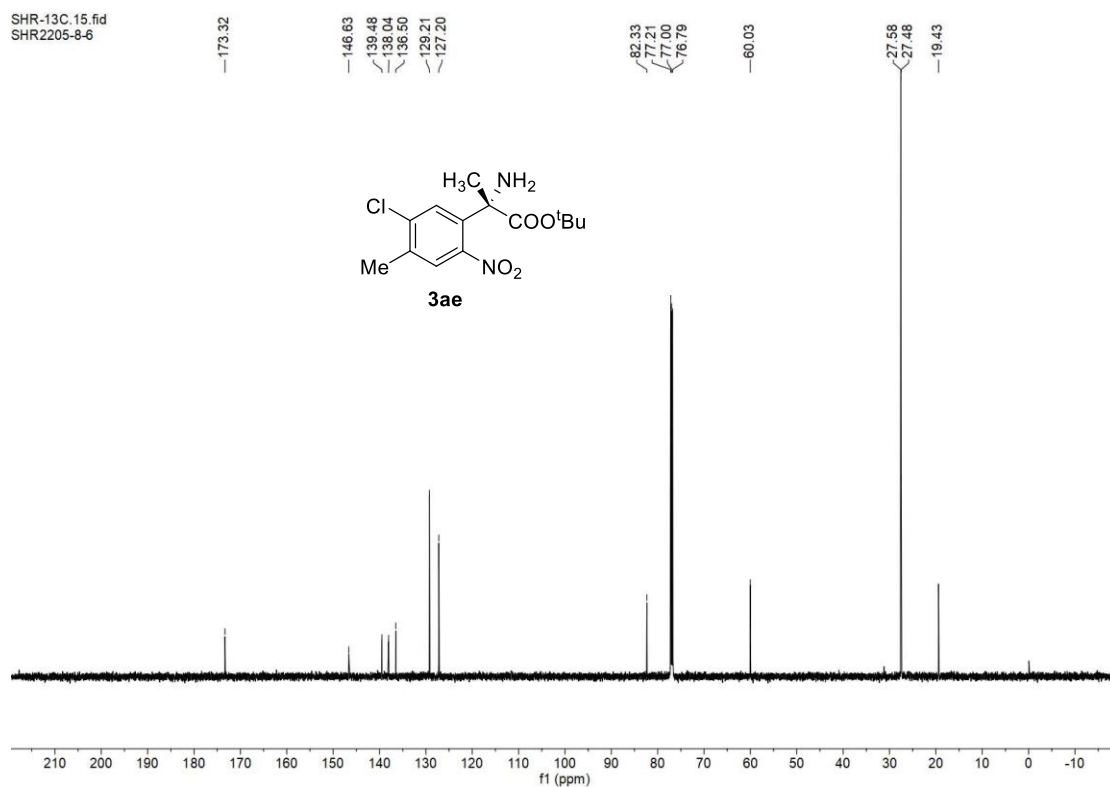

SHR-1H\_38.fid  
SHR2205-6-5

8.67  
8.42  
8.41  
8.40  
8.40  
8.23  
8.21

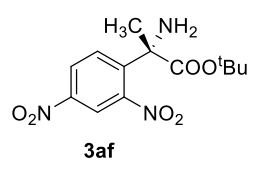

-1.97  
-1.81  
-1.42

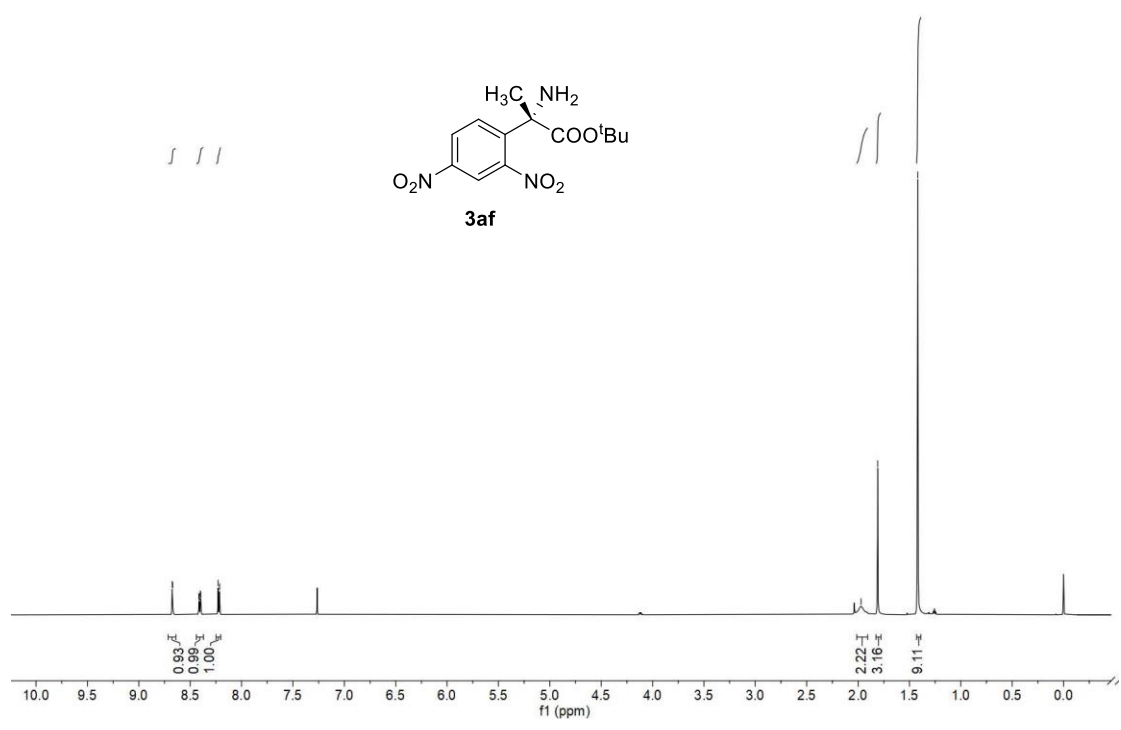

SHR-13C\_10.fid  
SHR2205-6-5

172.45  
149.05  
146.93  
145.99  
130.36  
126.67  
120.30

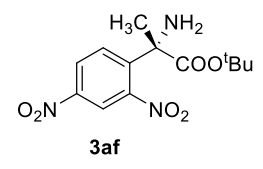

83.08  
77.26  
77.04  
76.83  
60.64

27.85  
27.62

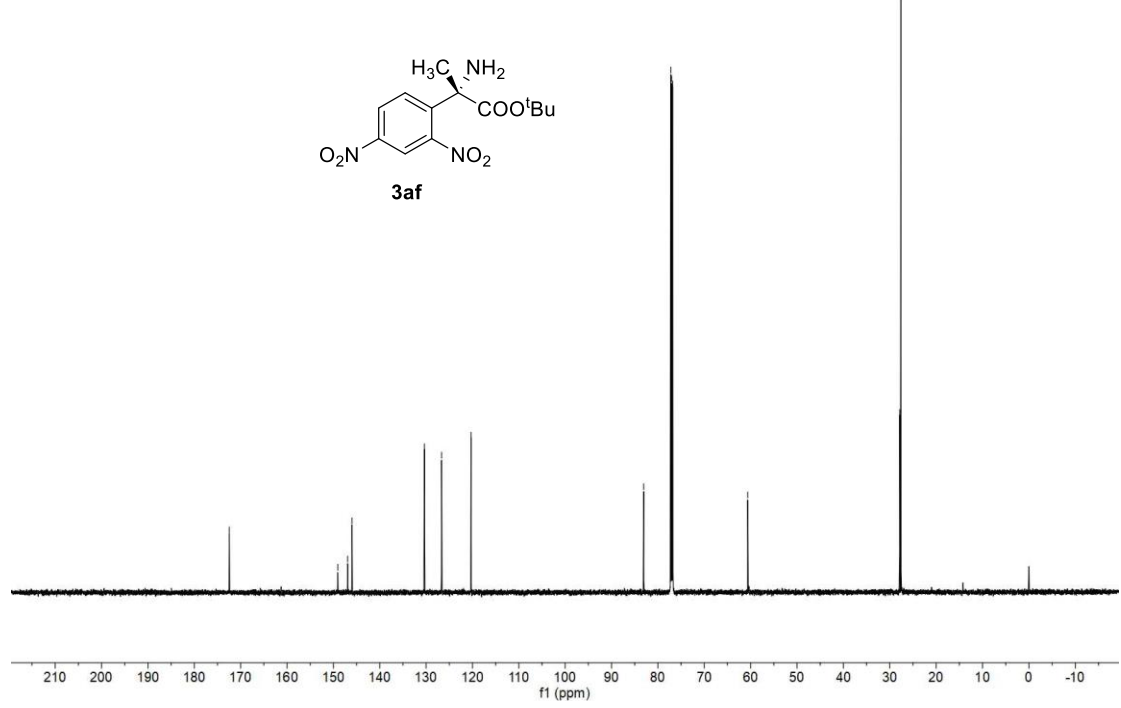

SHR-1H.10.fid  
SHR2205-8-1

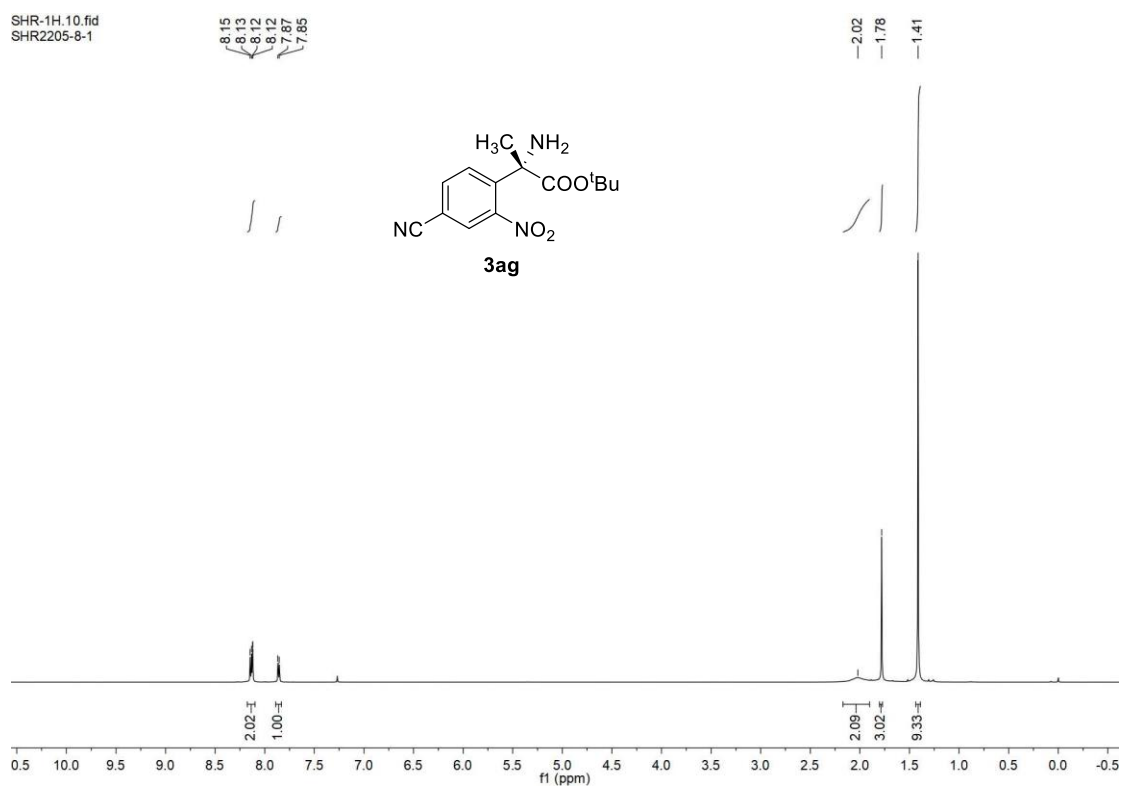

SHR-13C.3.fid  
SHR2205-8-1

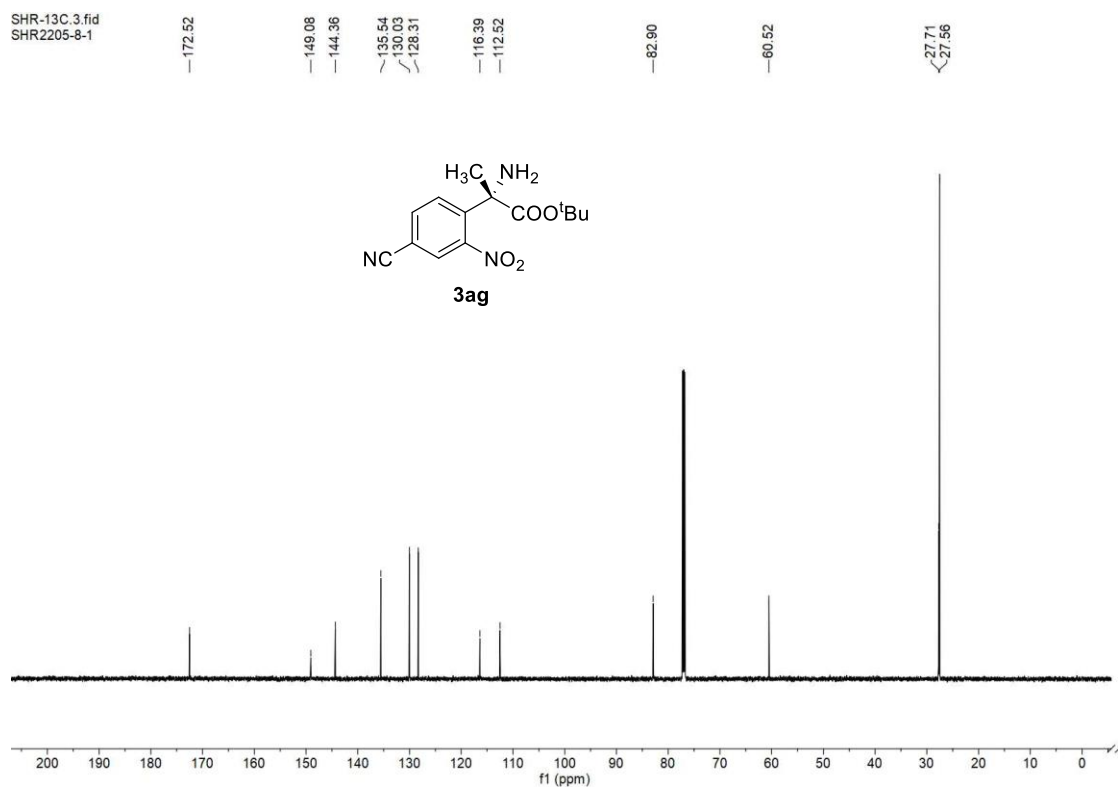

SHR-1H.22.fid  
SHR2205-18-4

8.14  
8.12  
8.11  
7.85  
7.83

2.07  
1.79  
1.42

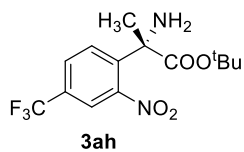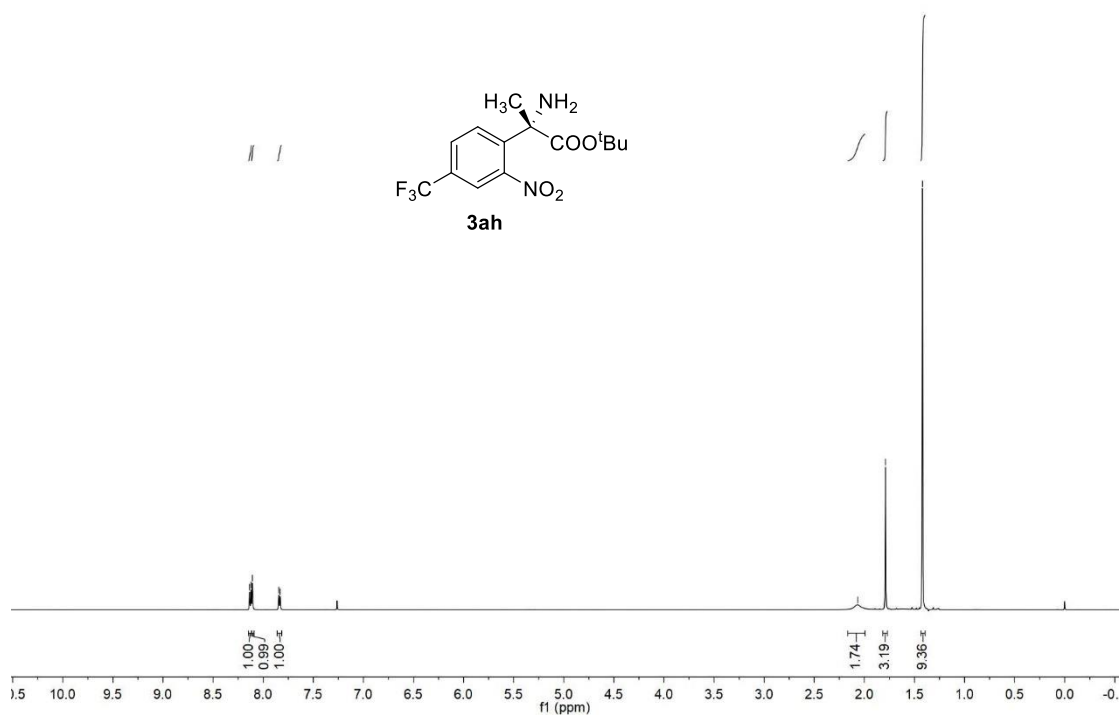

SHR-13C.6.fid  
SHR2205-18-4

172.91

148.91

143.04

131.10

130.87

130.64

130.68

129.16

129.14

129.12

129.09

125.51

123.71

122.18

122.15

122.12

122.10

121.90

82.67

77.19

76.98

76.76

60.41

27.78

27.57

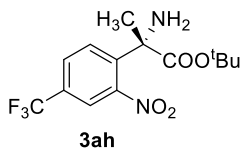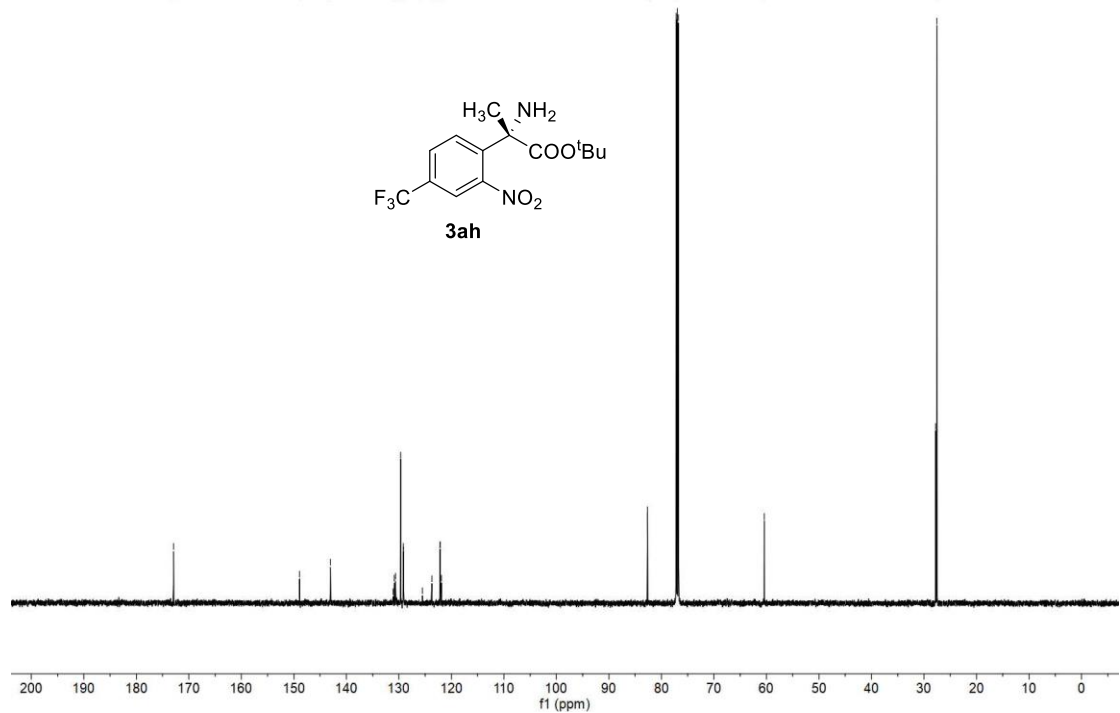

SHR-1H.39.fid  
SHR2205-18-3

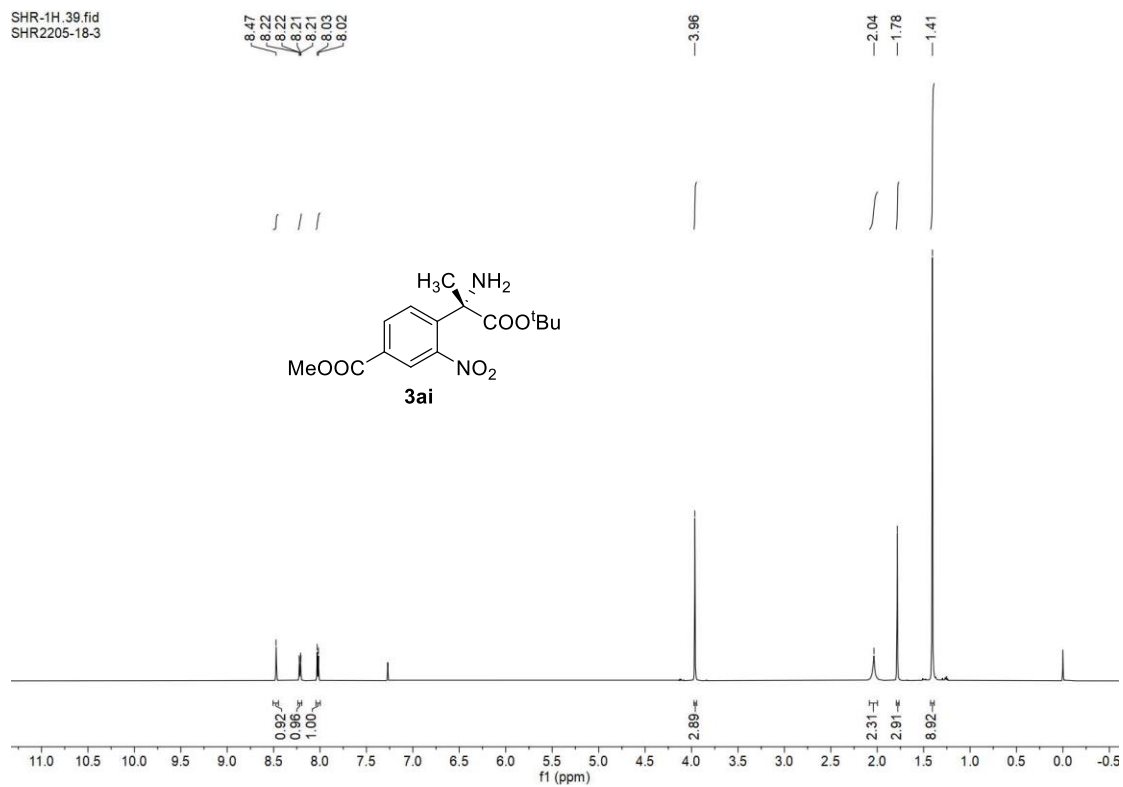

SHR-13C.11.fid  
SHR2205-18-3

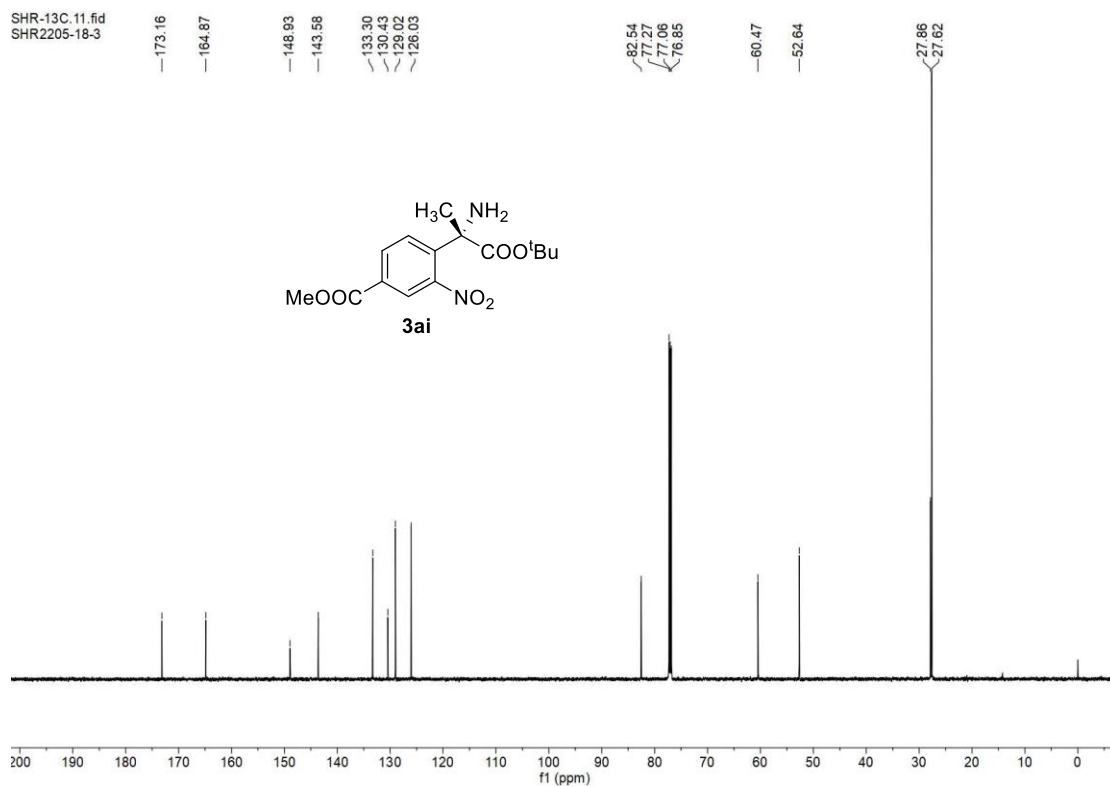

SHR-1H.17.fid  
SHR2207-8-3

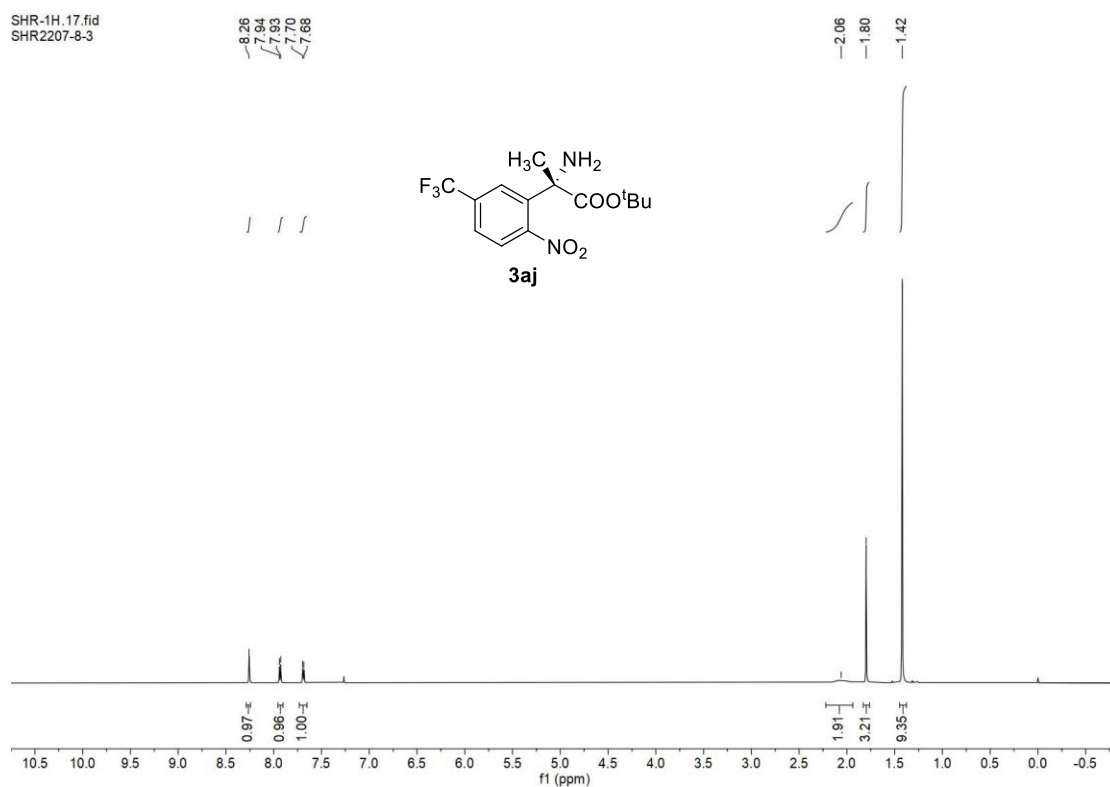

SHR-13C.9.fid  
SHR2207-8-3

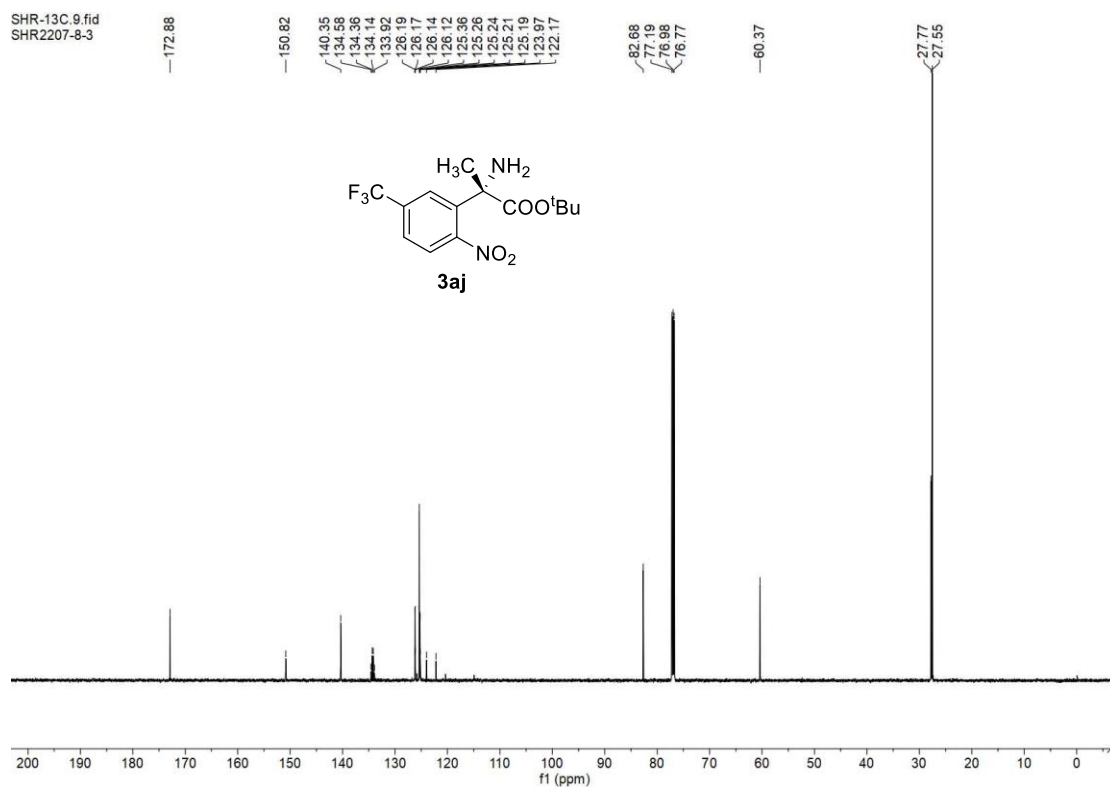



SHR-1H.19.fid  
SHR2207-8-4

9.05  
8.04  
8.95  
6.94  
8.38  
7.99  
7.97  
7.63  
7.62  
7.61

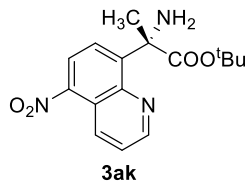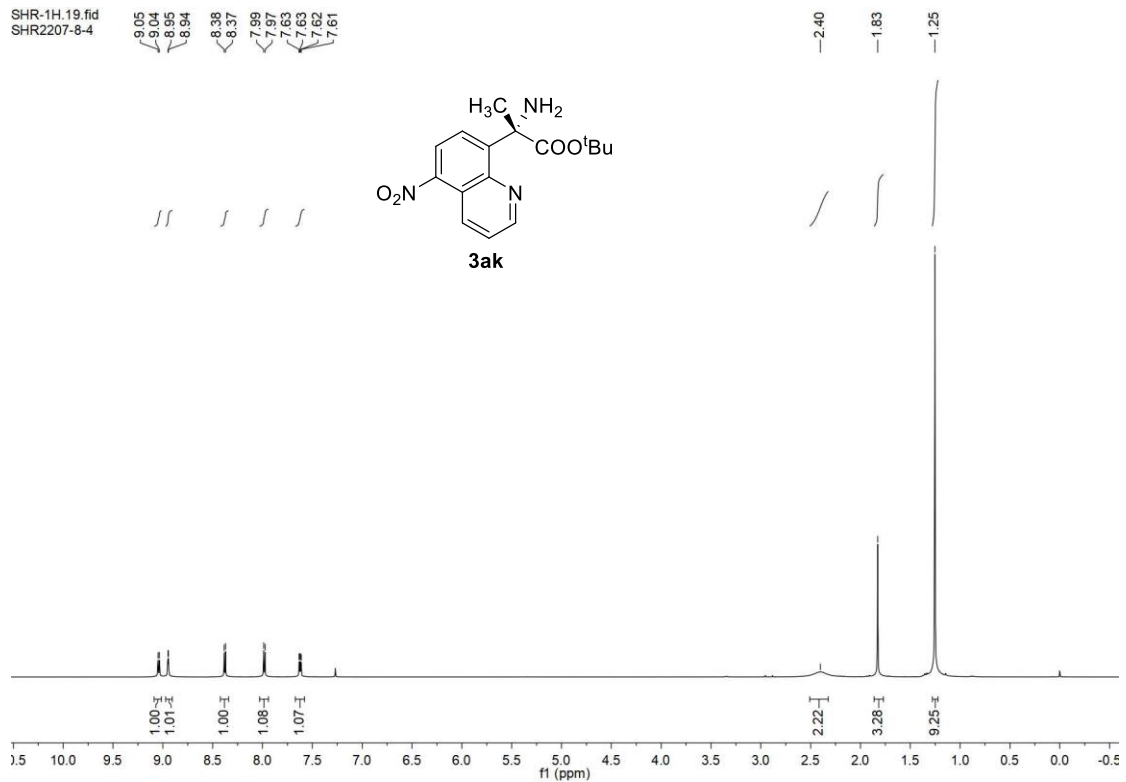

SHR-13C.8.fid  
SHR2207-8-4

176.21  
150.34  
148.54  
145.59  
144.76  
132.39  
124.55  
124.05  
123.43  
121.24  
80.71  
77.61  
77.00  
76.78  
60.10  
27.63  
25.63

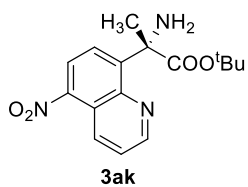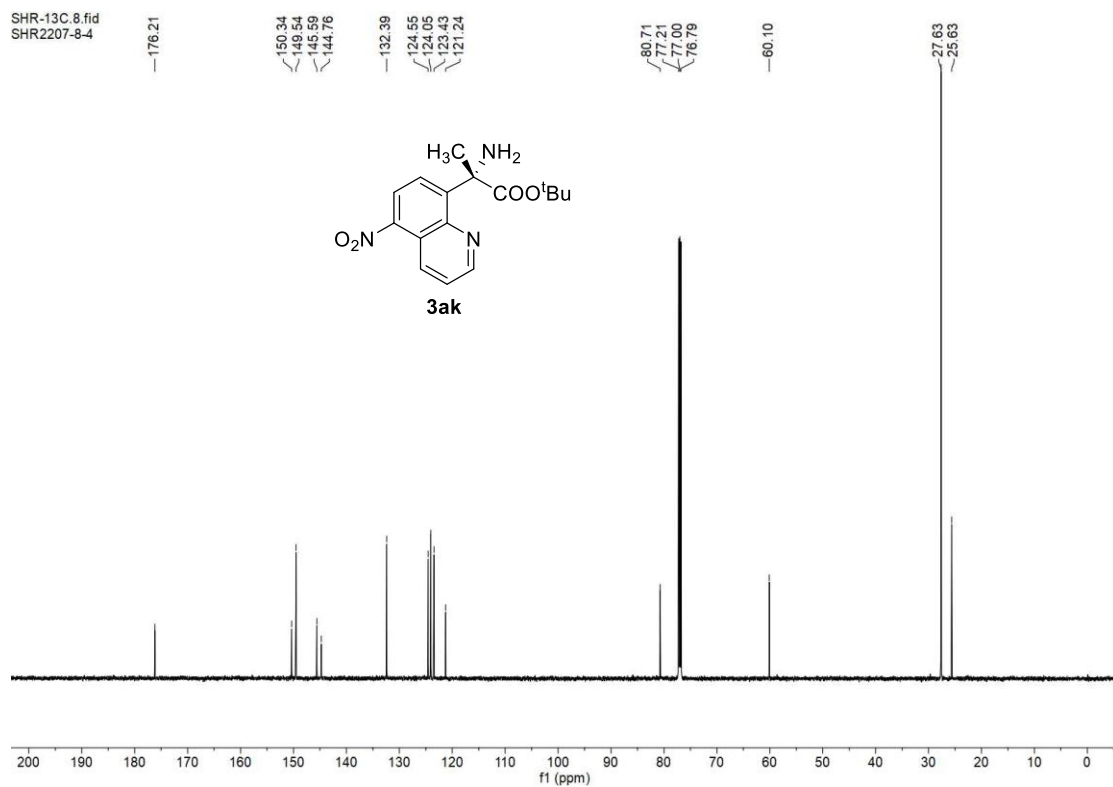

SHR-1H\_30.fid  
SHR2207-17-2-2

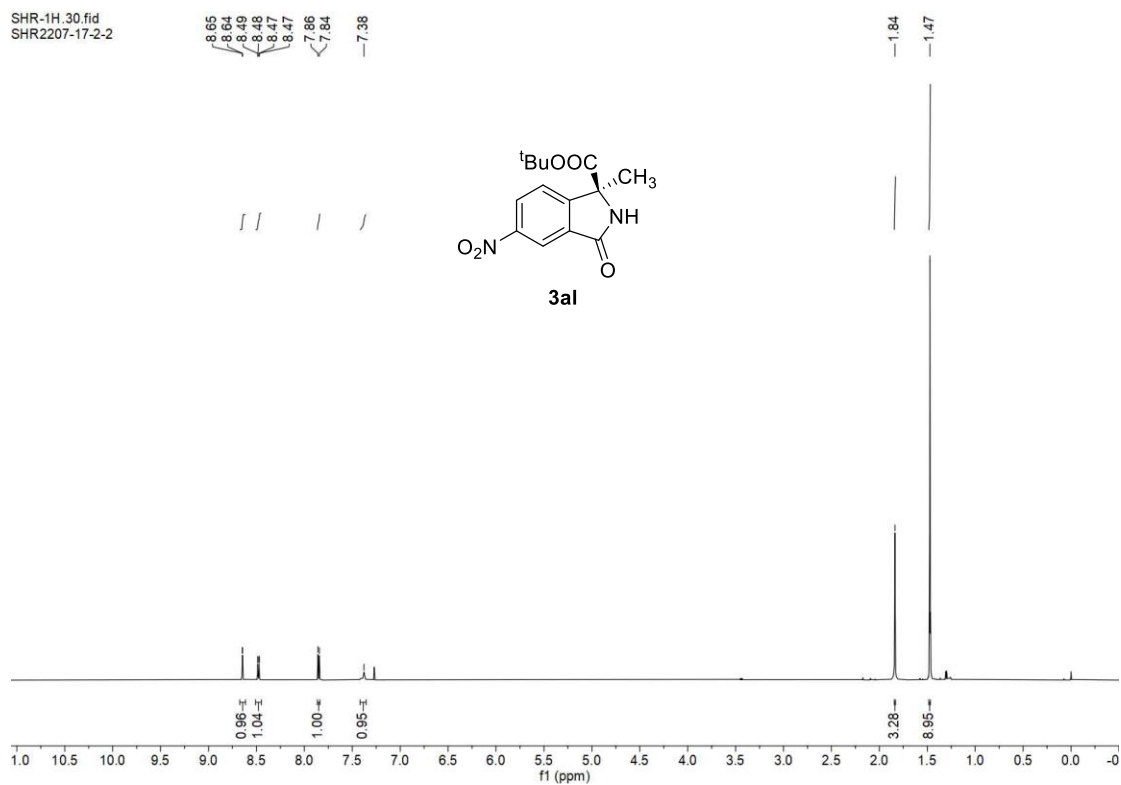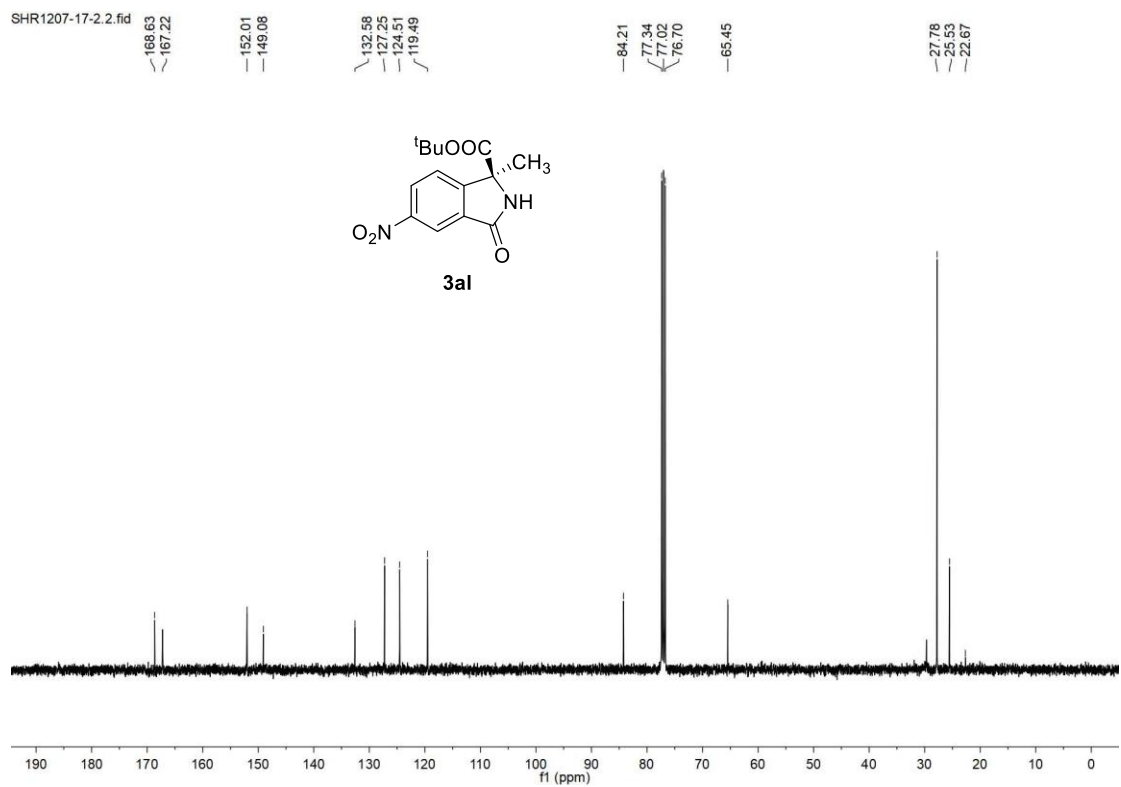

SHR-1H.39.fid  
SHR2207-24-4

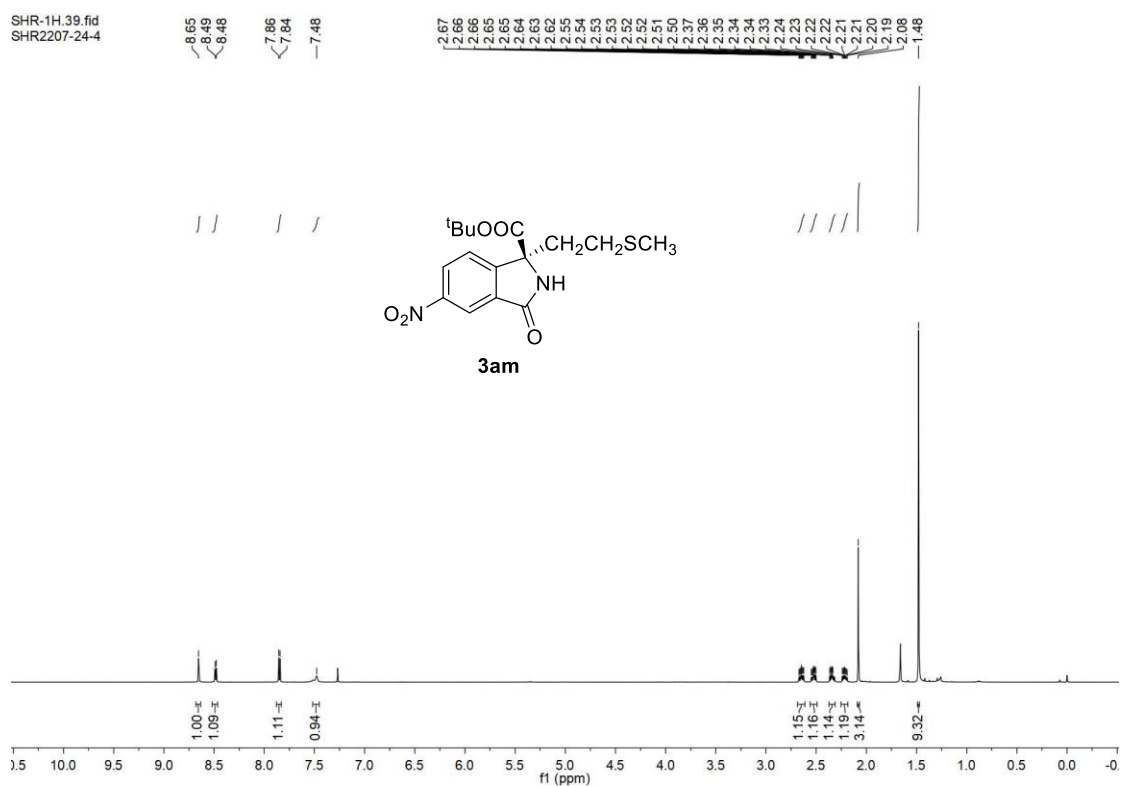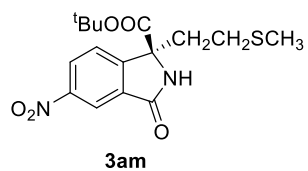

SHR-13C.15.fid  
SHR2207-24-4

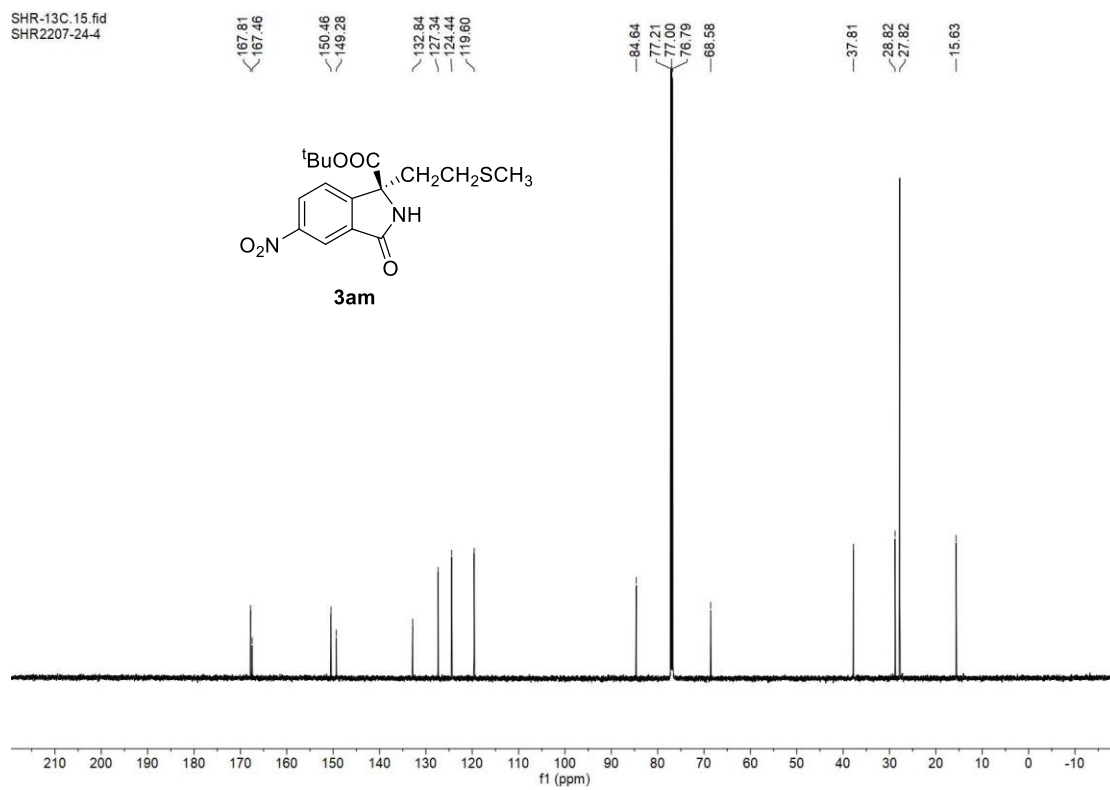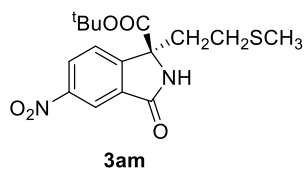

SHR-1H.28.fid  
SHR2207-14-1

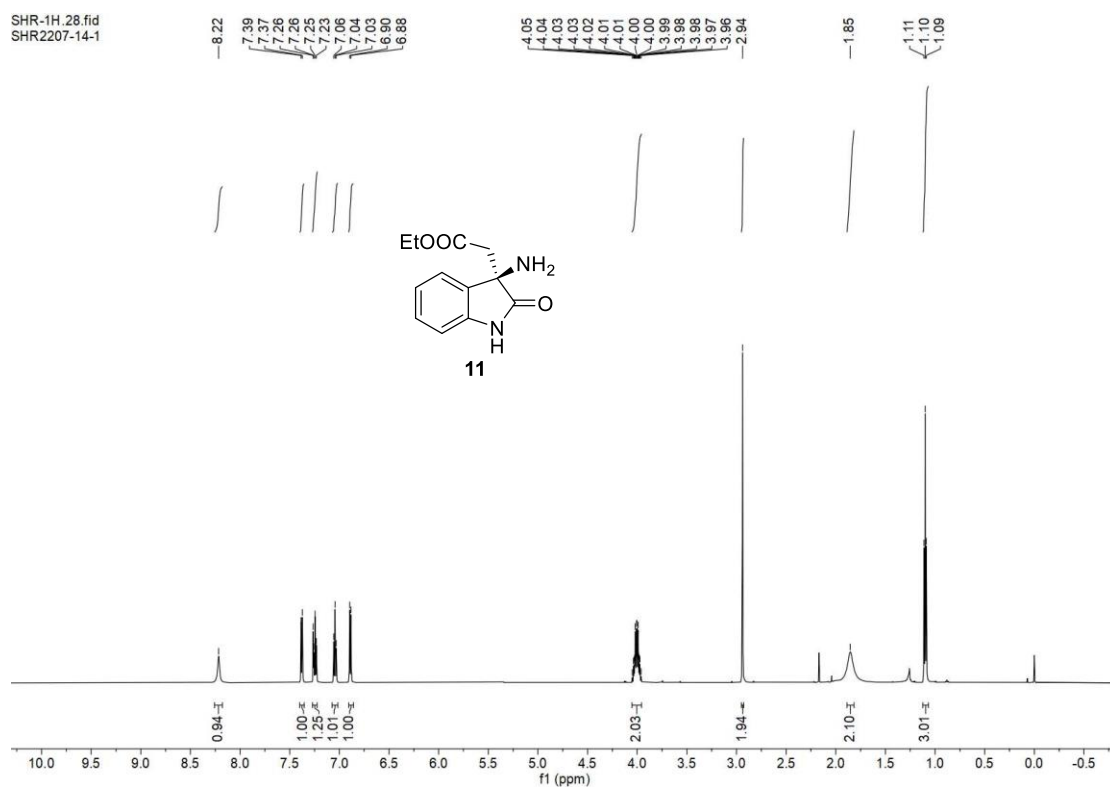

SHR-13C.13.fid  
SHR2207-14-1

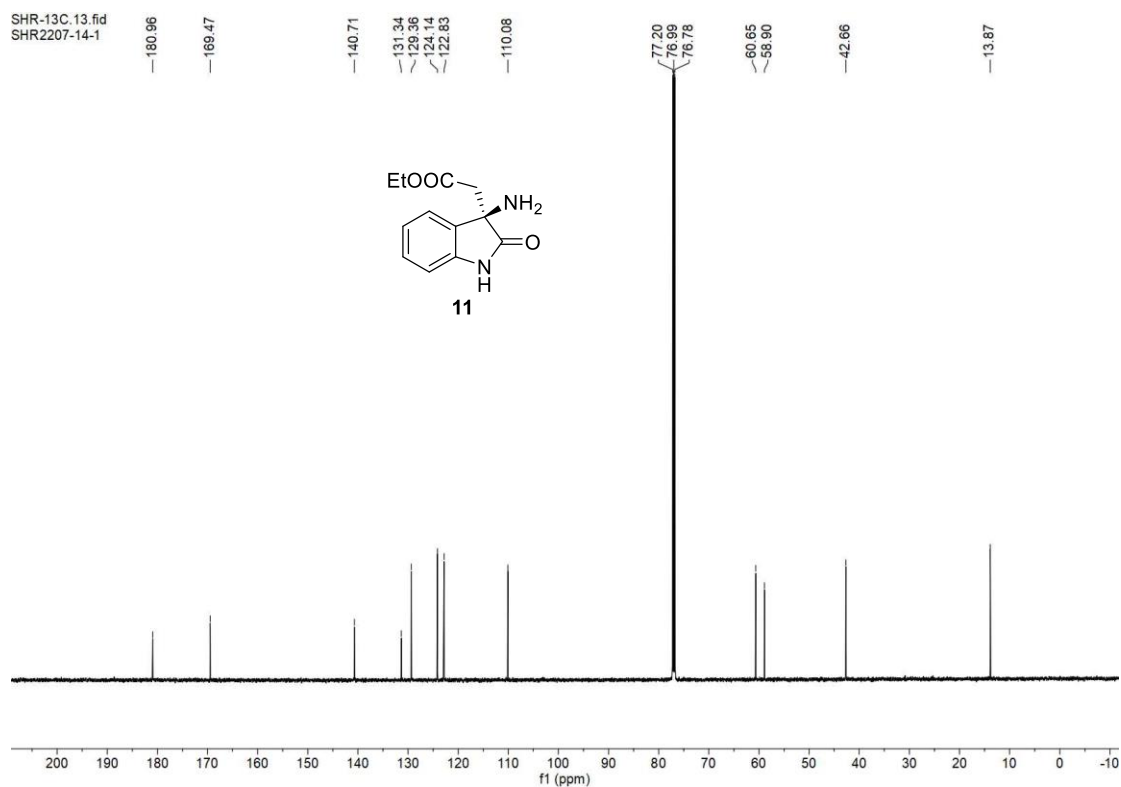

SHR-1H.23.fid  
SHR2207-12-1

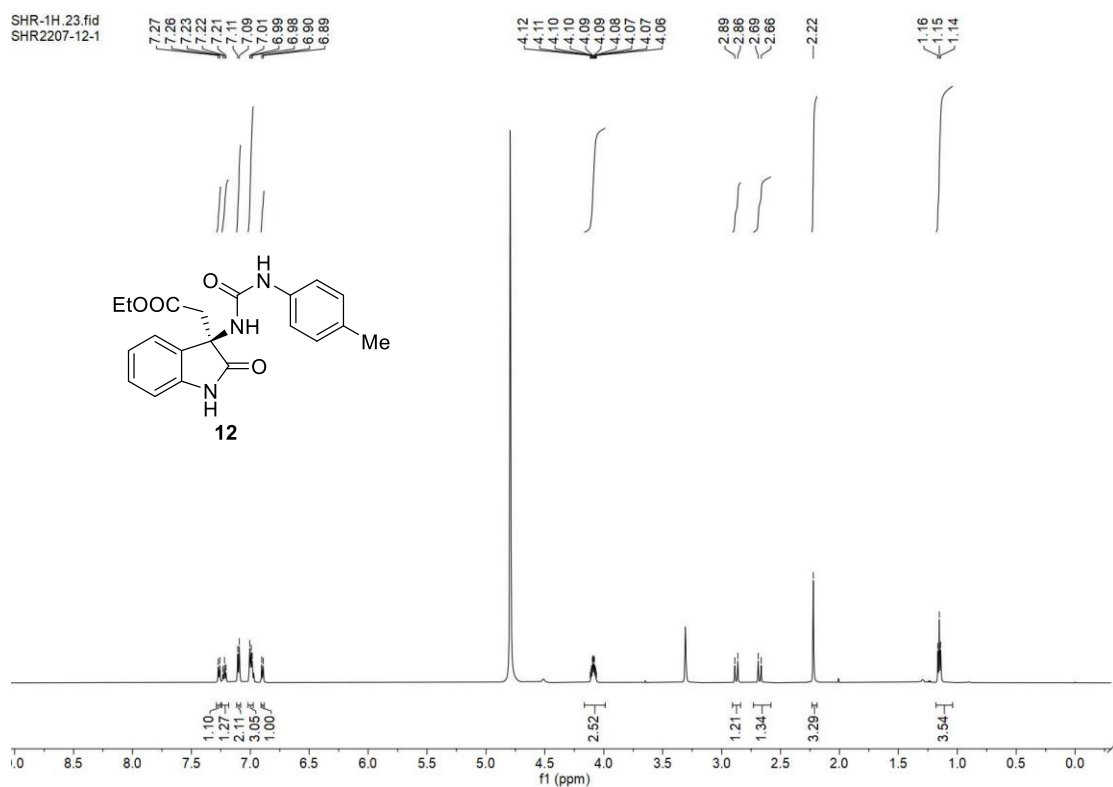

SHR-13C.7.fid  
SHR2207-12-1

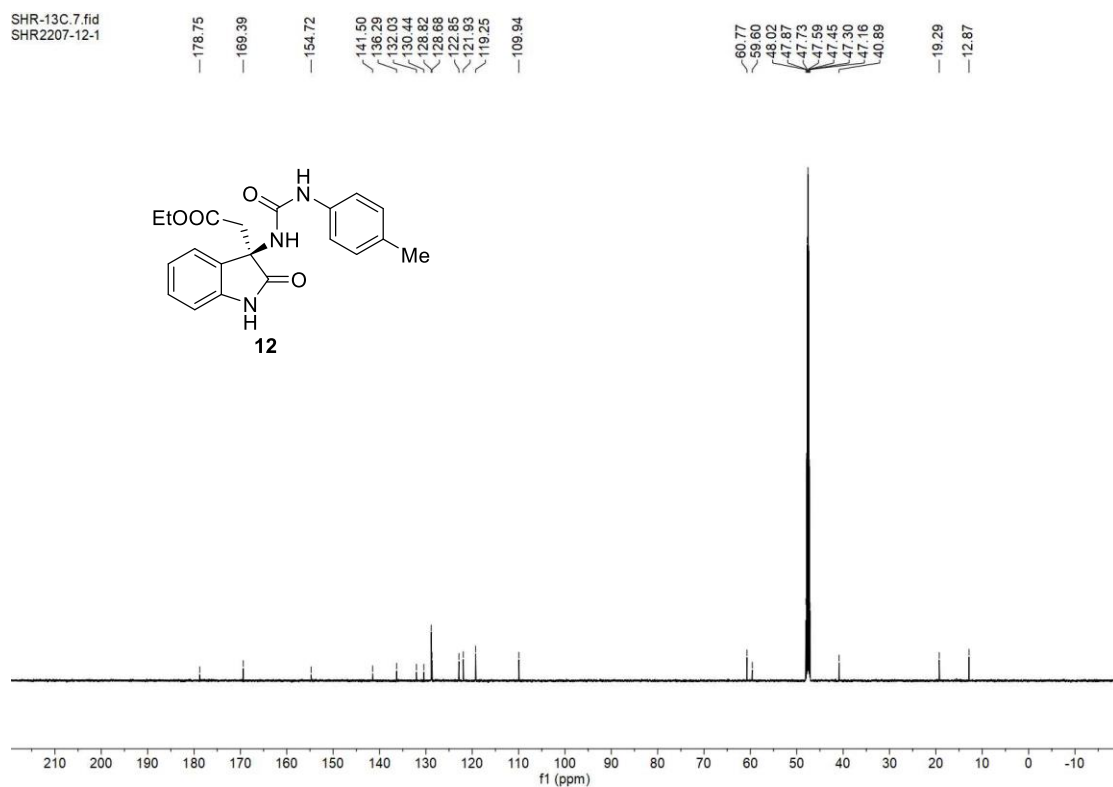

SHR-1H.86.fid  
SHR2207-17-1

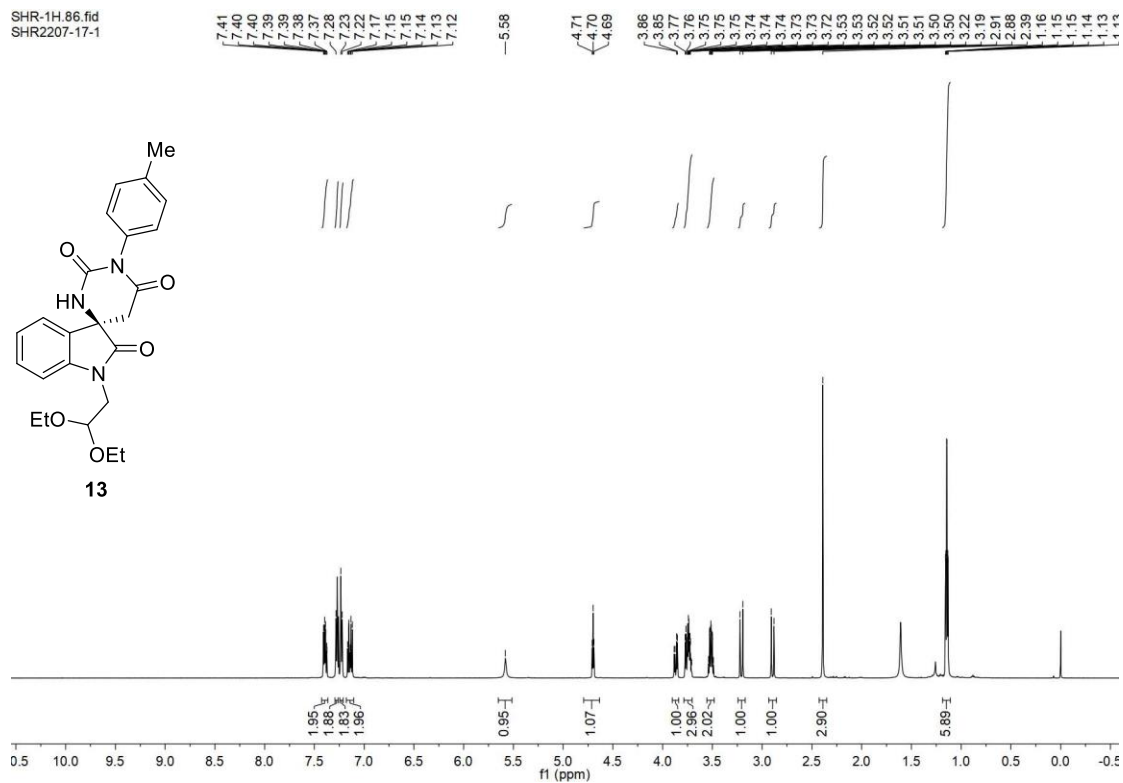

SHR-13C.27.fid  
SHR2207-17-1

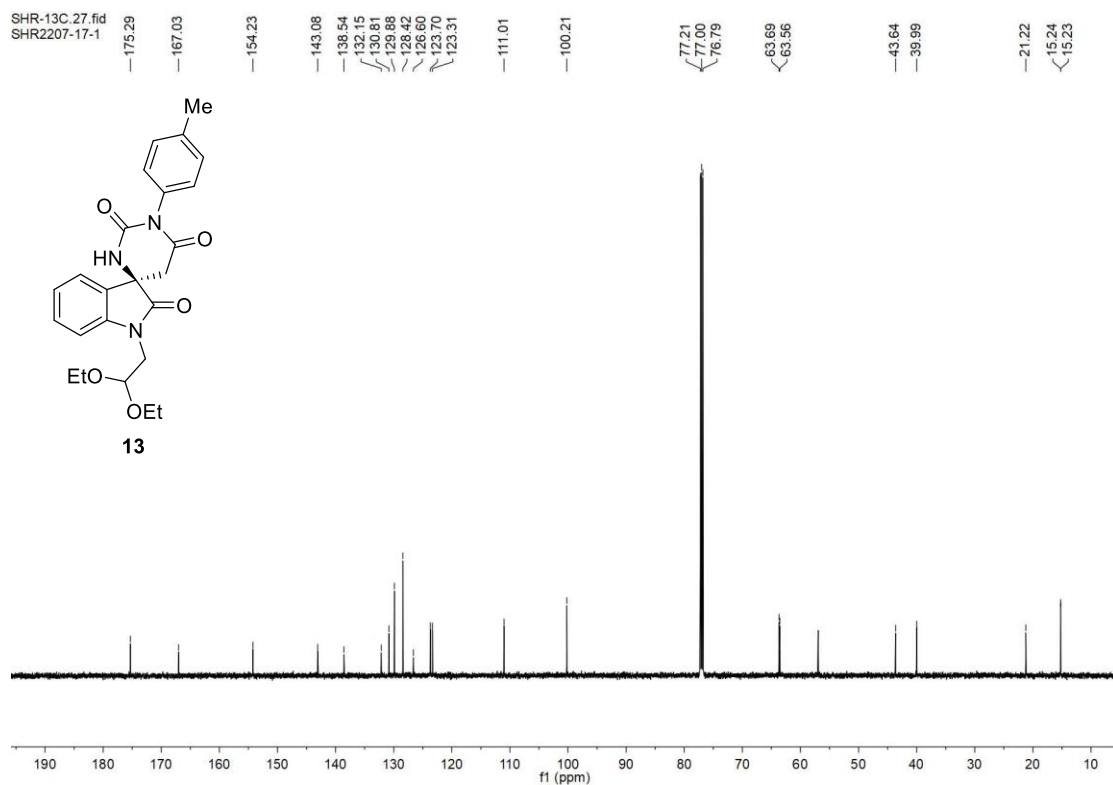

SHR-1H.94.fid  
SHR2210-16-1

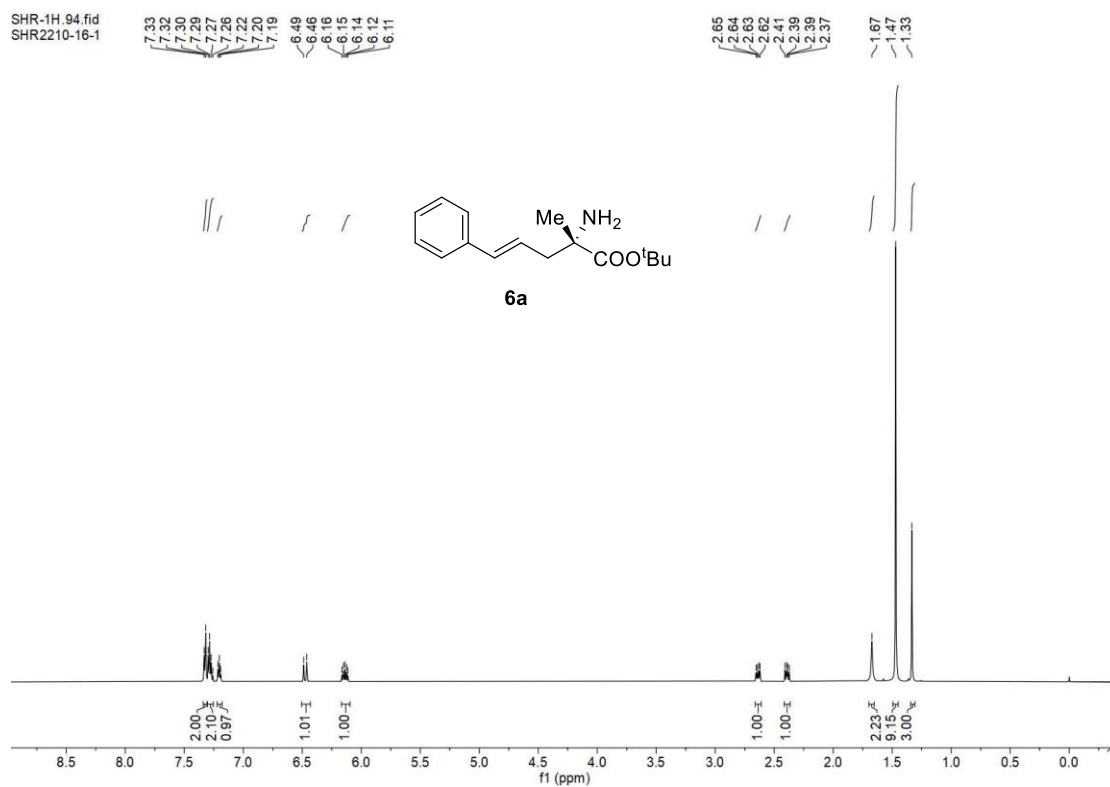

SHR-13C.94.fid  
SHR2210-16-1

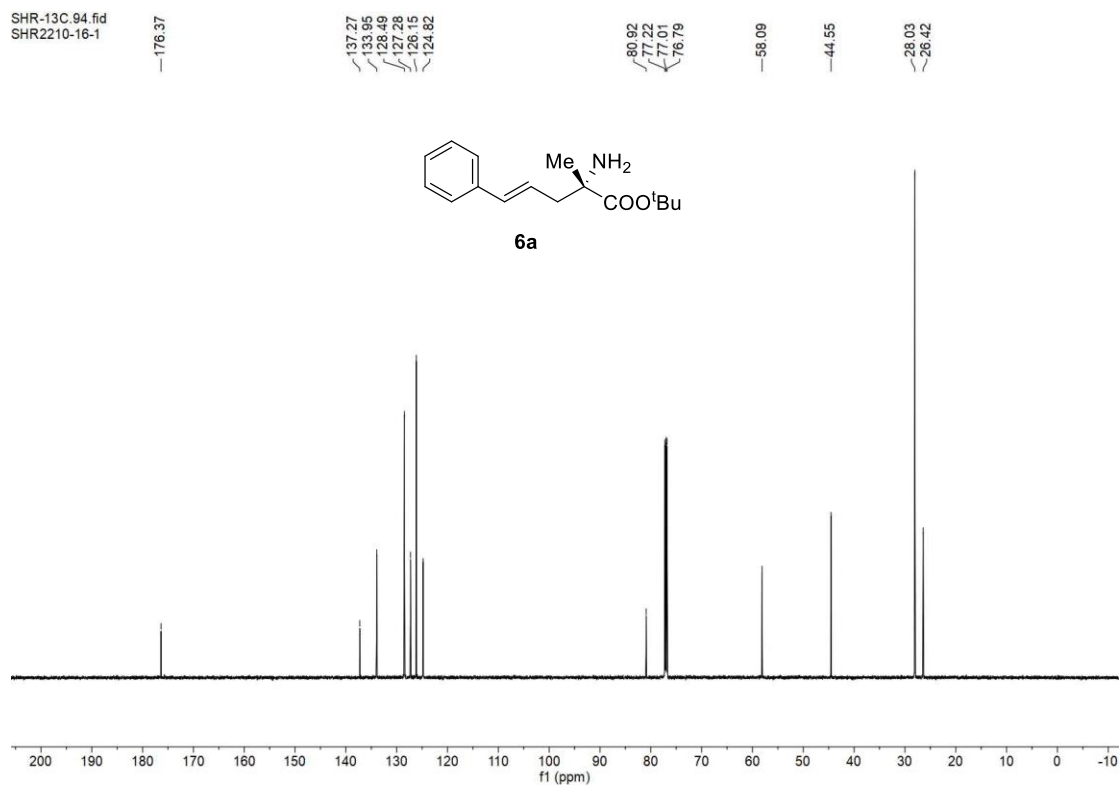

LZX-1H.12.fid  
LZX-20220928-5

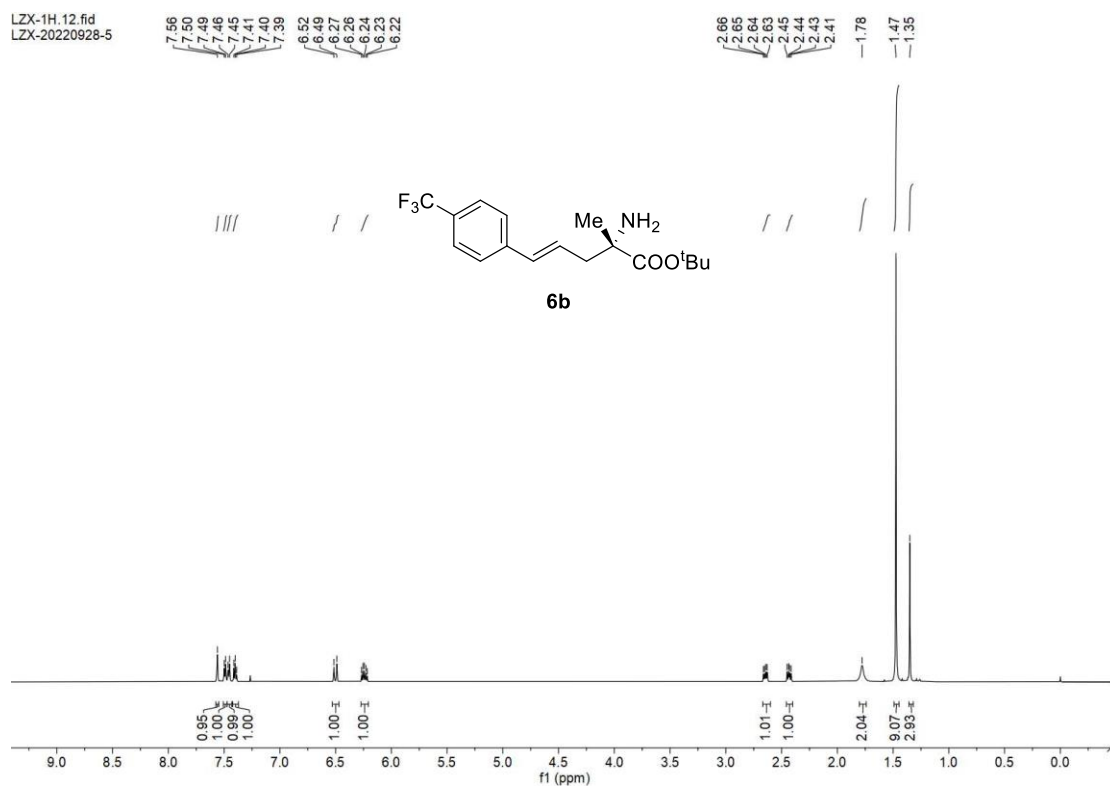

LZX-13C.3.fid  
LZX-20220928-5

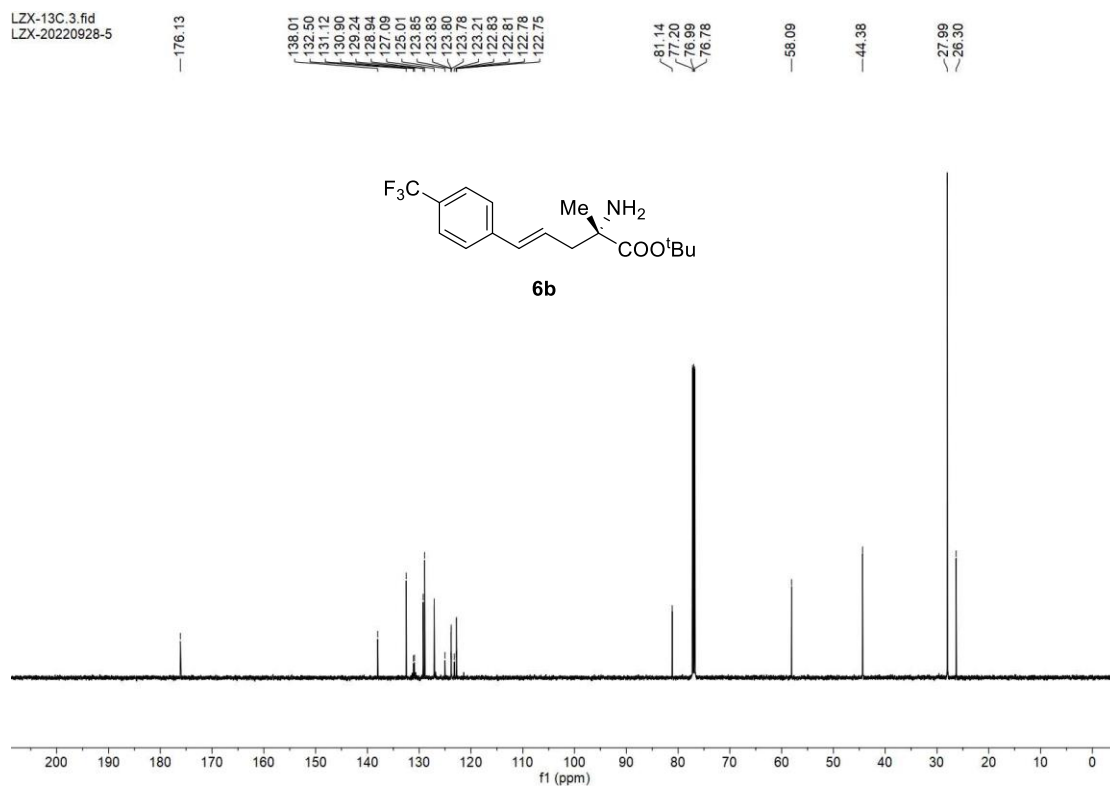



LZX-1H.10.fid  
LZX-20220928-4

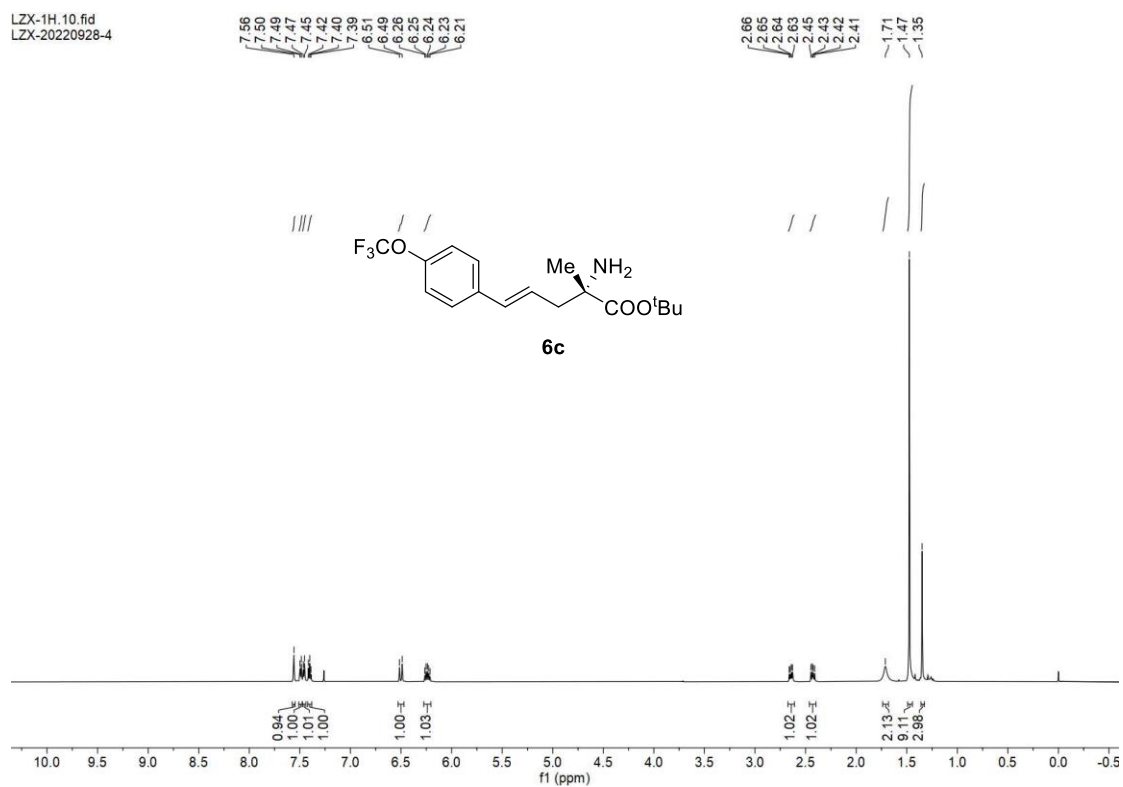

LZX-13C.1.fid  
LZX-20220928-4

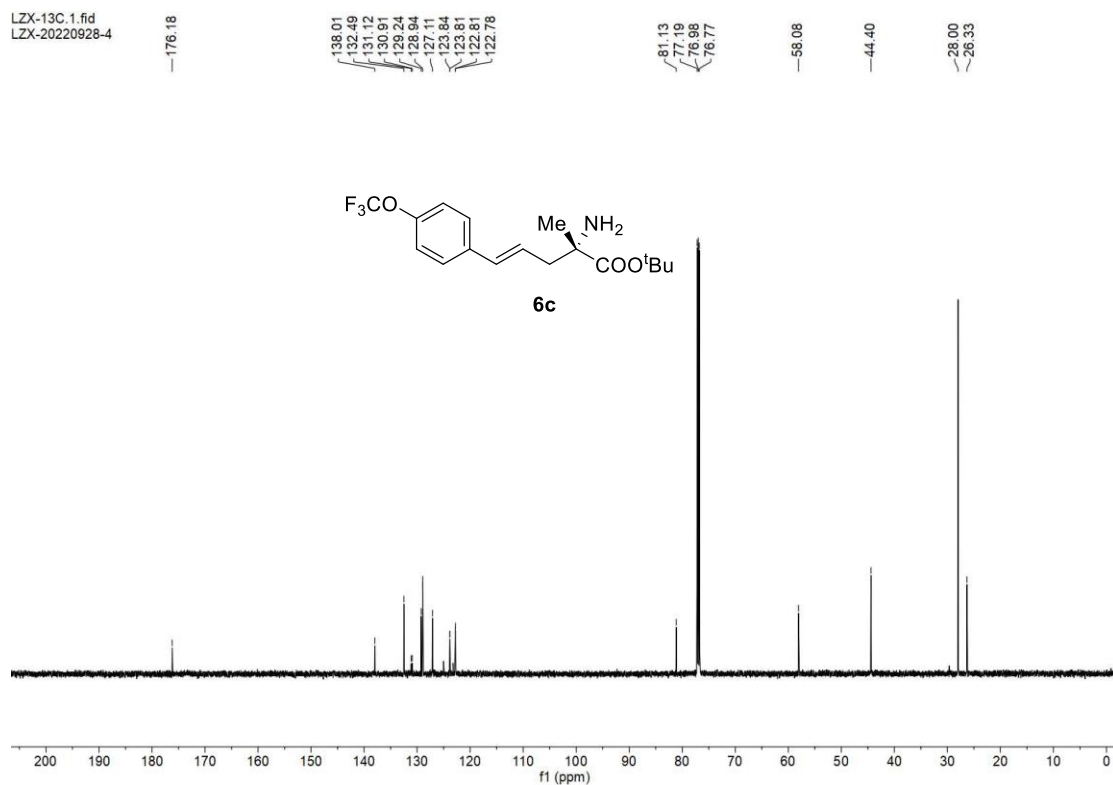

LZX-1H, 13, fid  
LZX-20220930-2

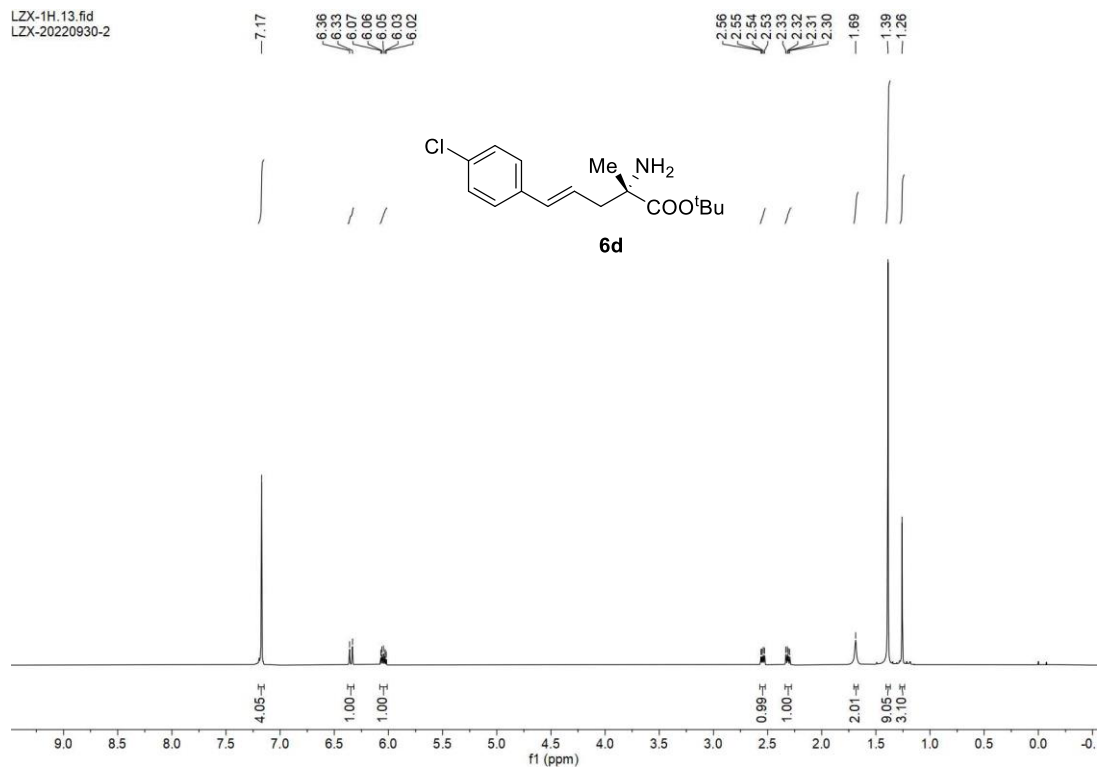

LZX-13C, 4, fid  
LZX-20220930-2

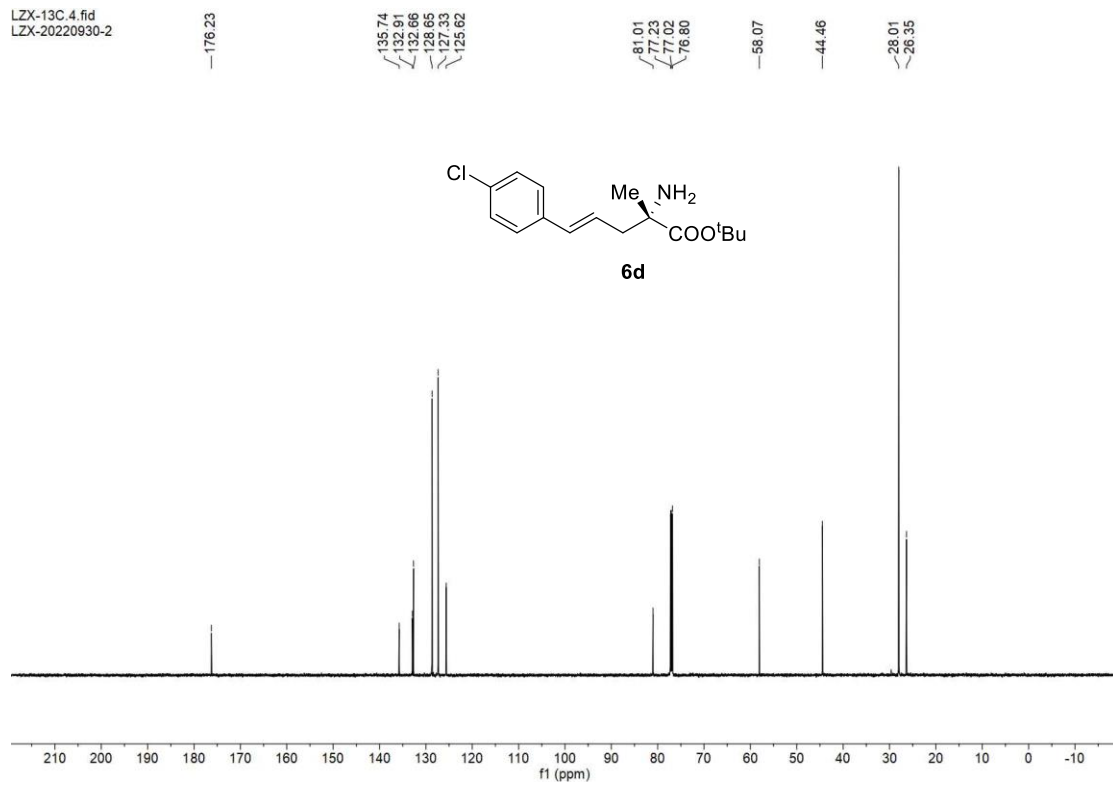

LZX-1H, 14.fid  
LZX-20221002-1

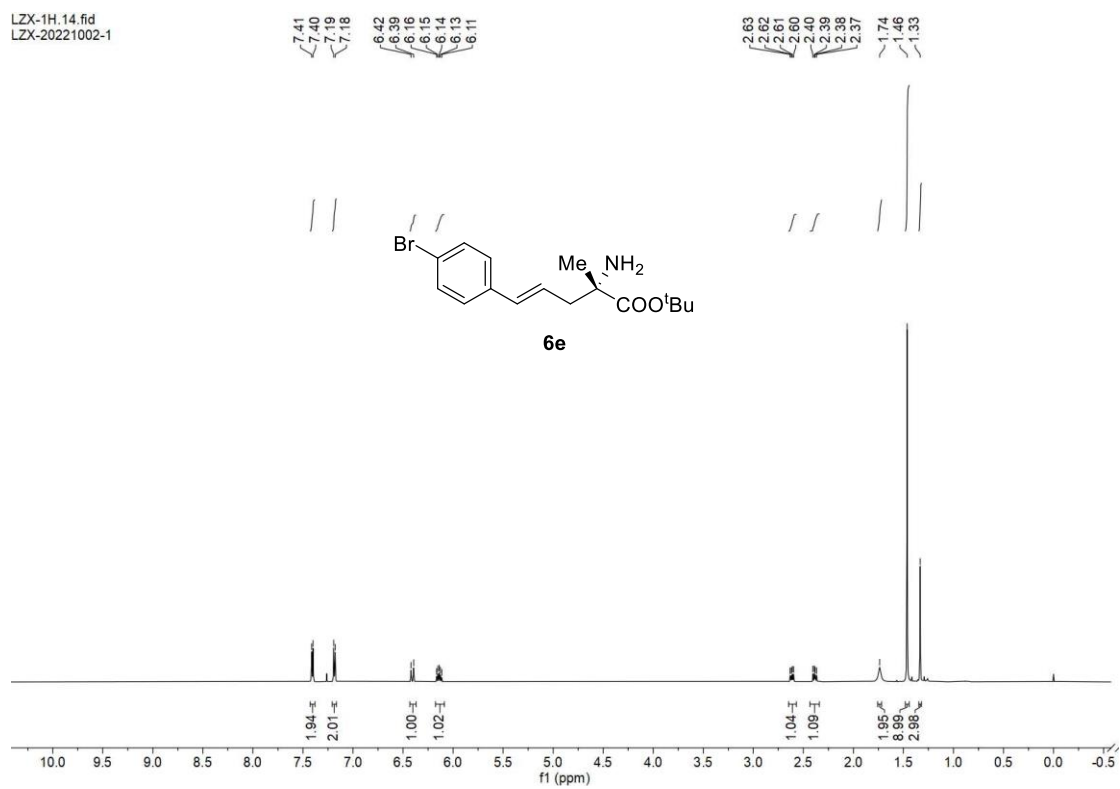

LZX-13C, 5.fid  
LZX-20221002-1

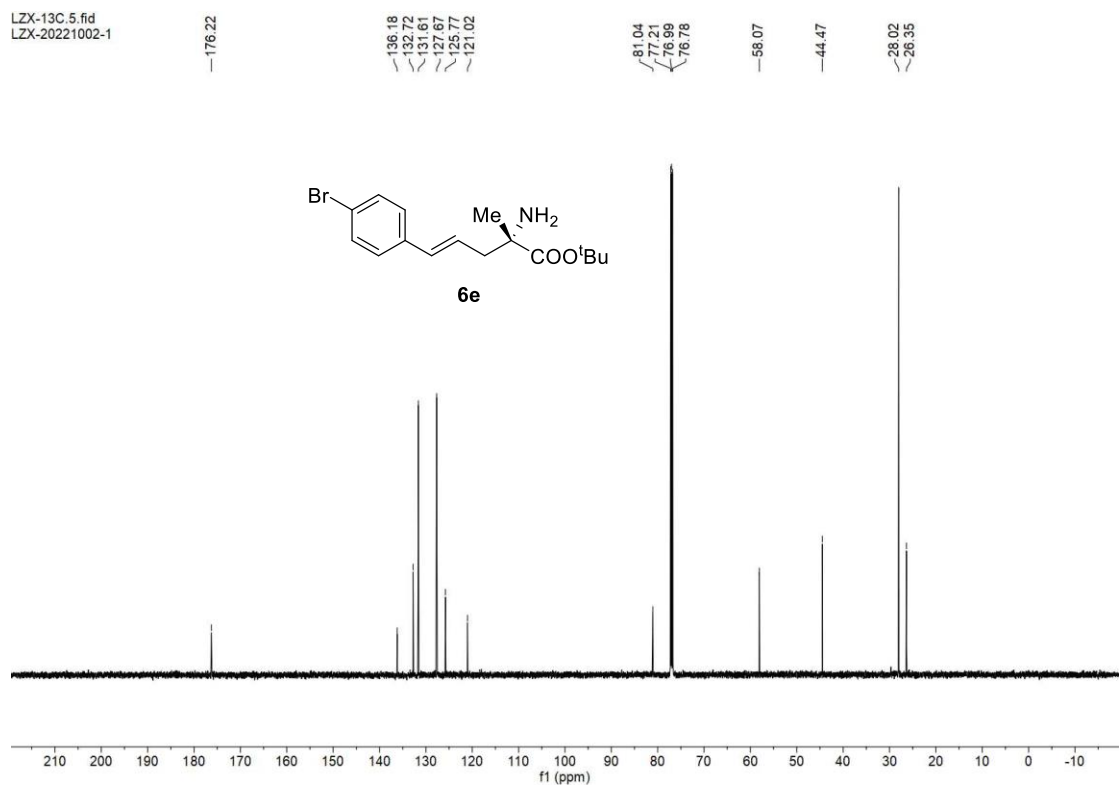

LZX-1H.15.fid  
LZX-20220930-3

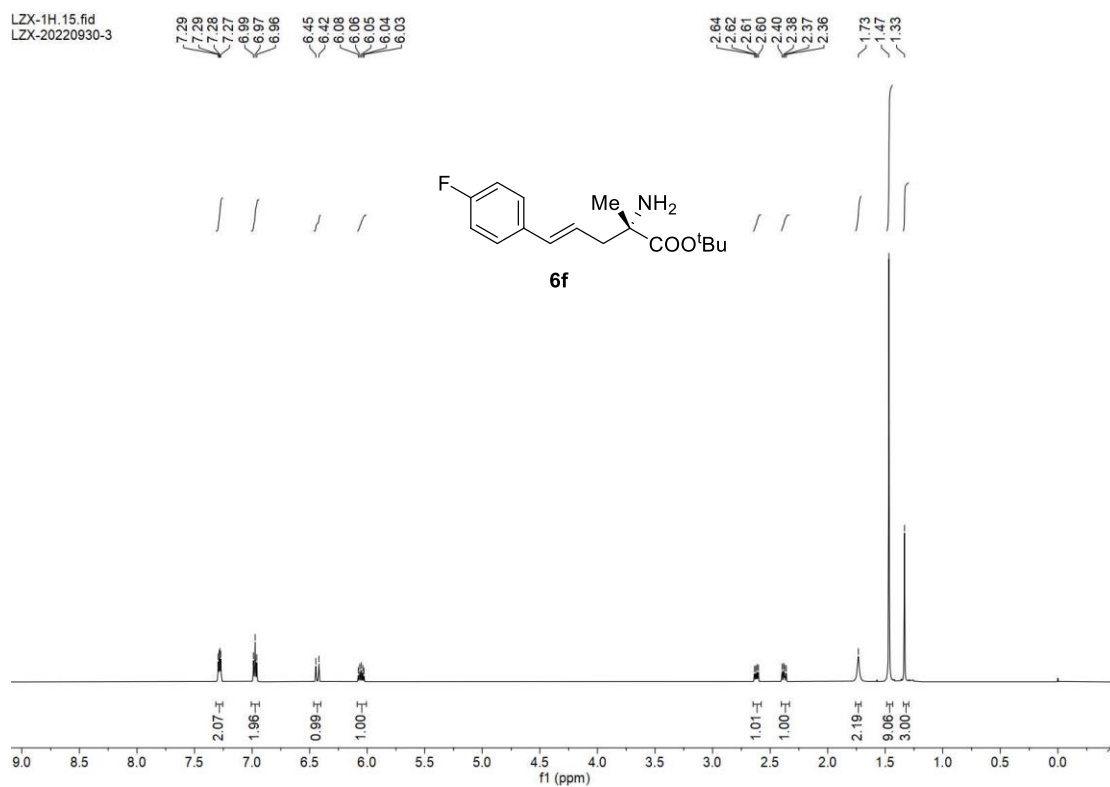

LZX-13C.6.fid  
LZX-20220930-3

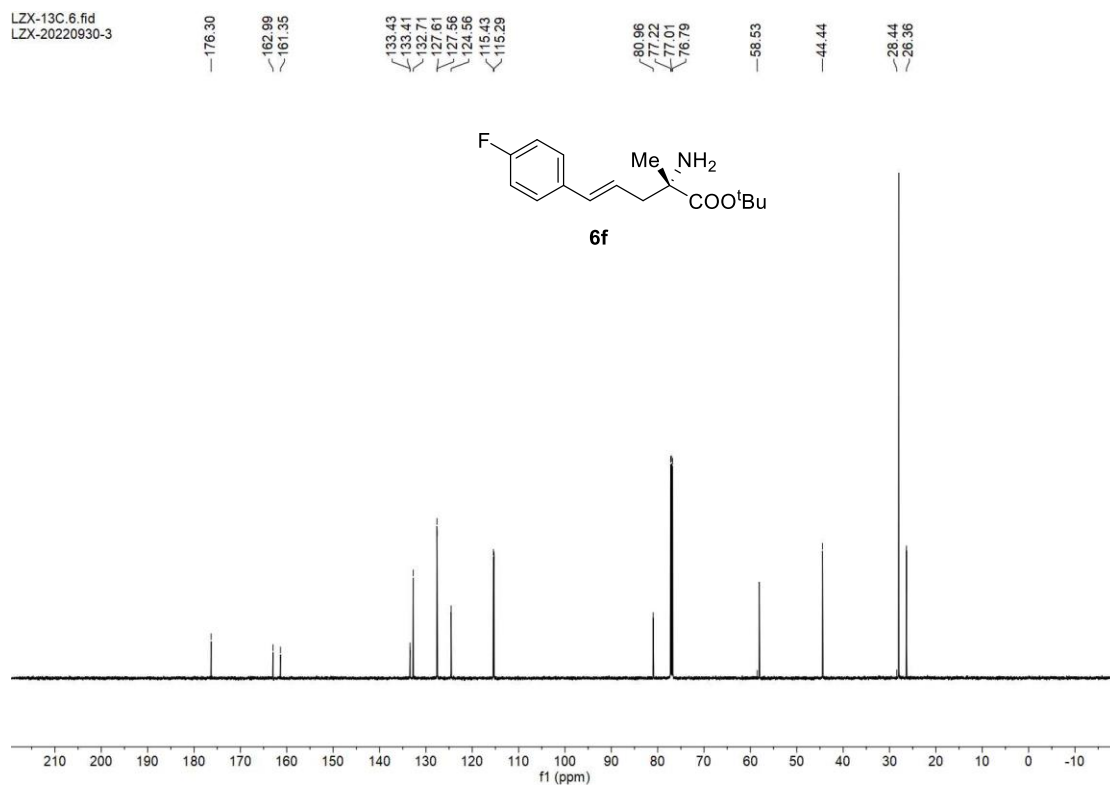

LCX-1H.23.fid  
LCX 20221007-2

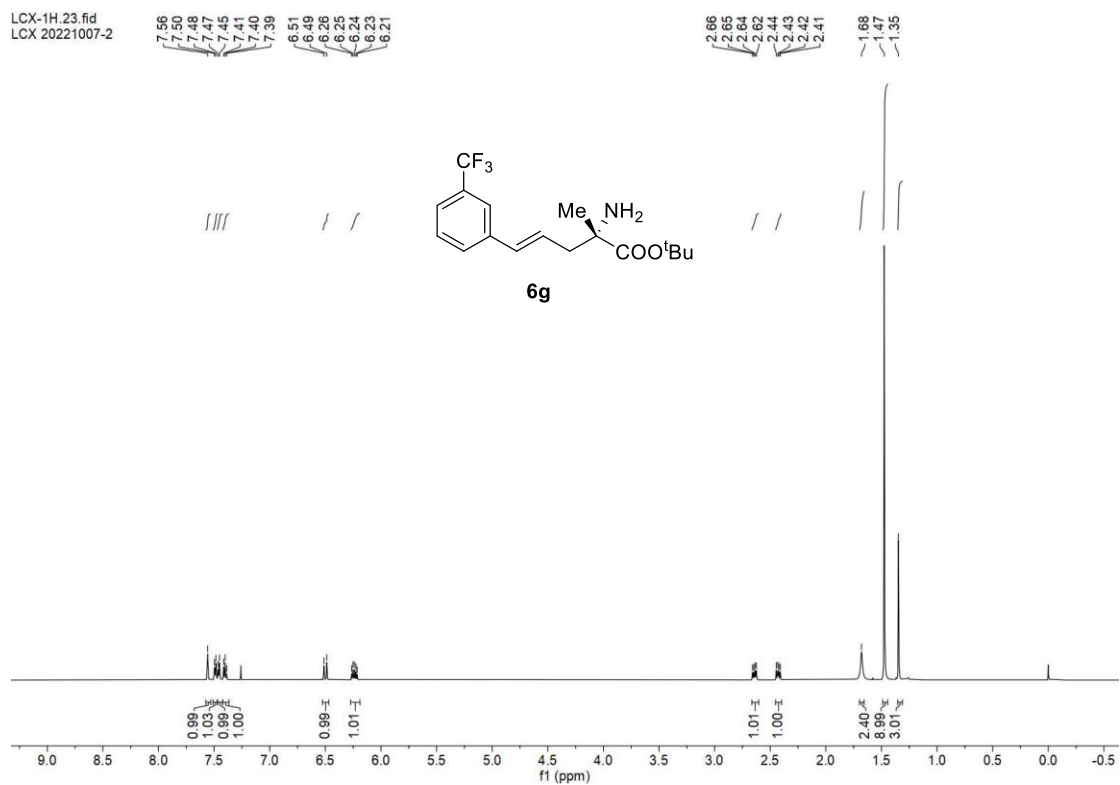

LCX-13C.13.fid  
LCX 20221007-2

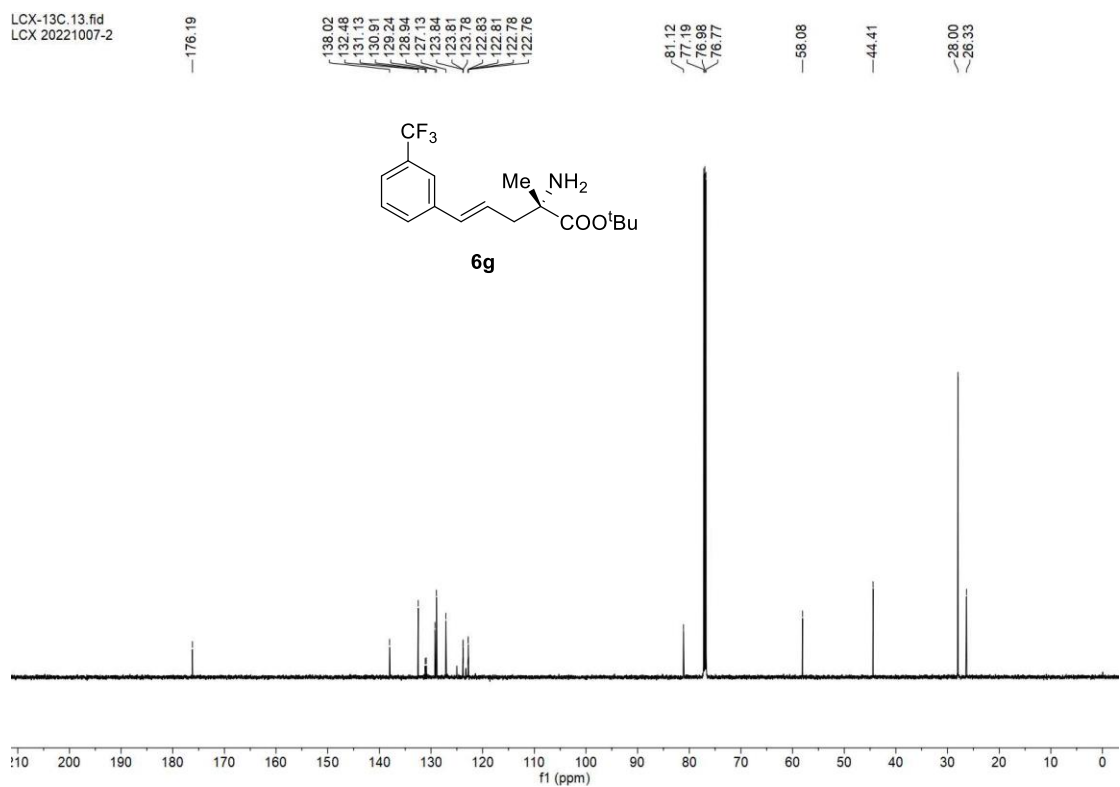

LCX-1H.21.fid  
LCX 20221006-4

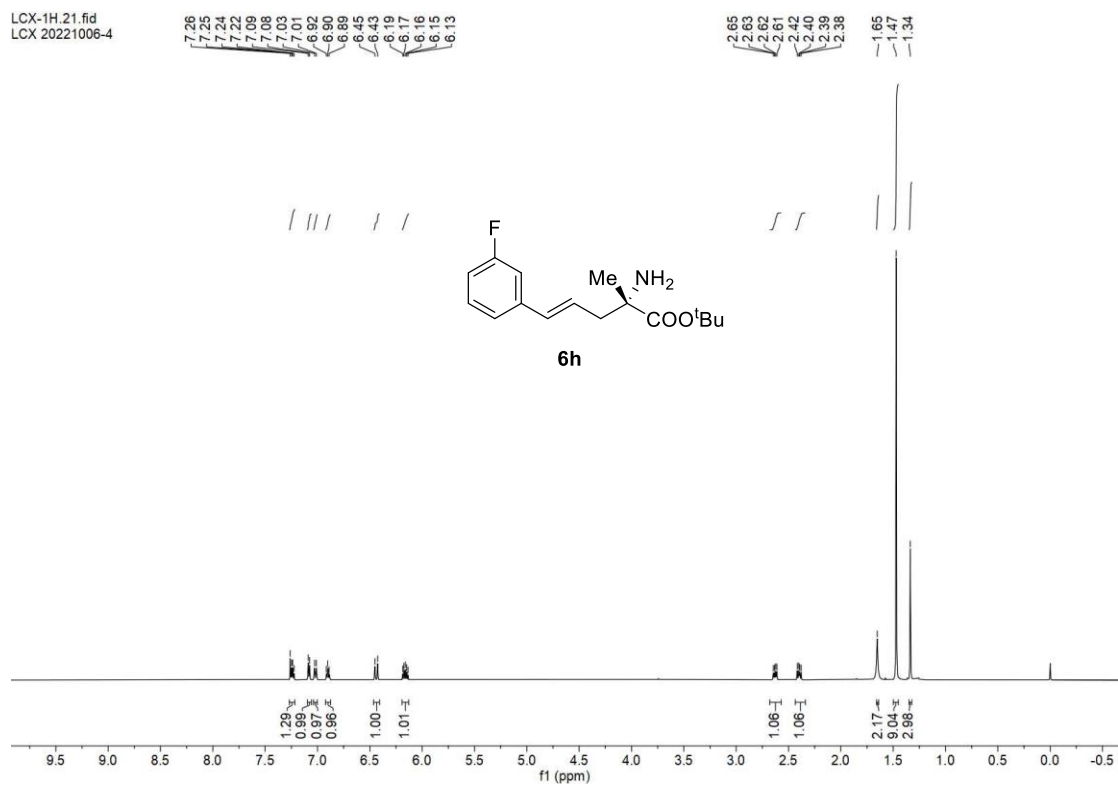

LCX-13C.11.fid  
LCX 20221006-4

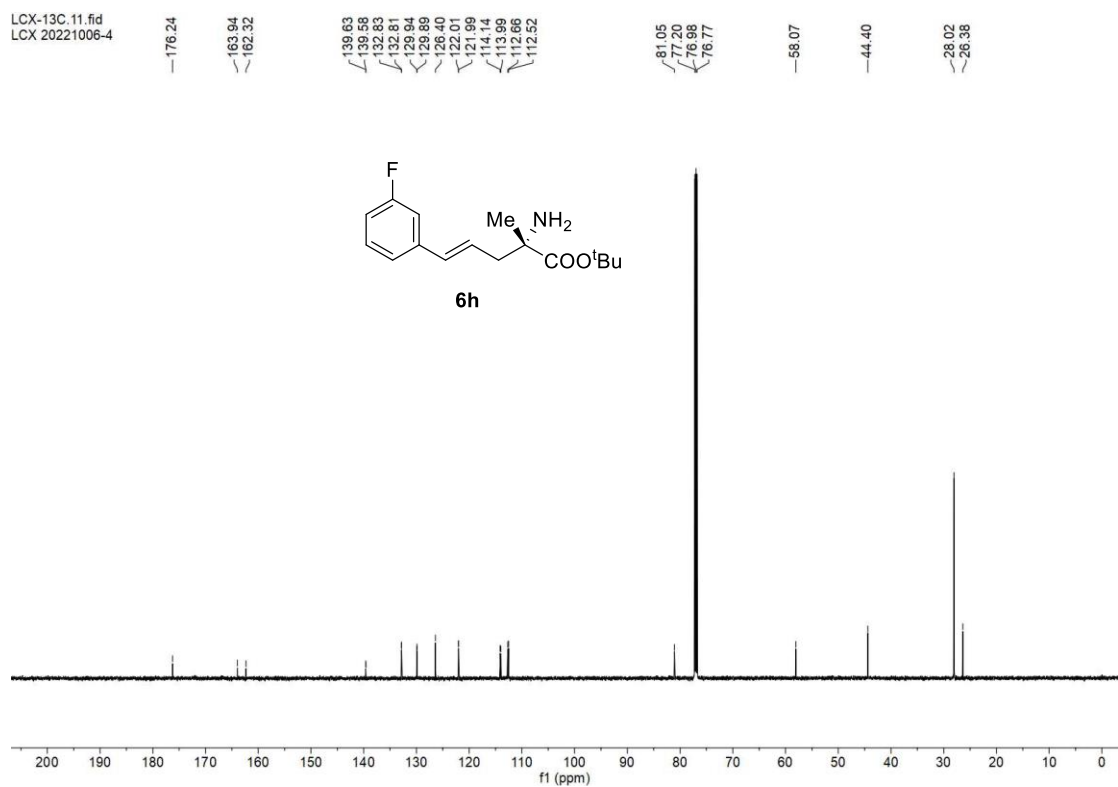

LCX-1H.20.fid  
LCX 20221008-3

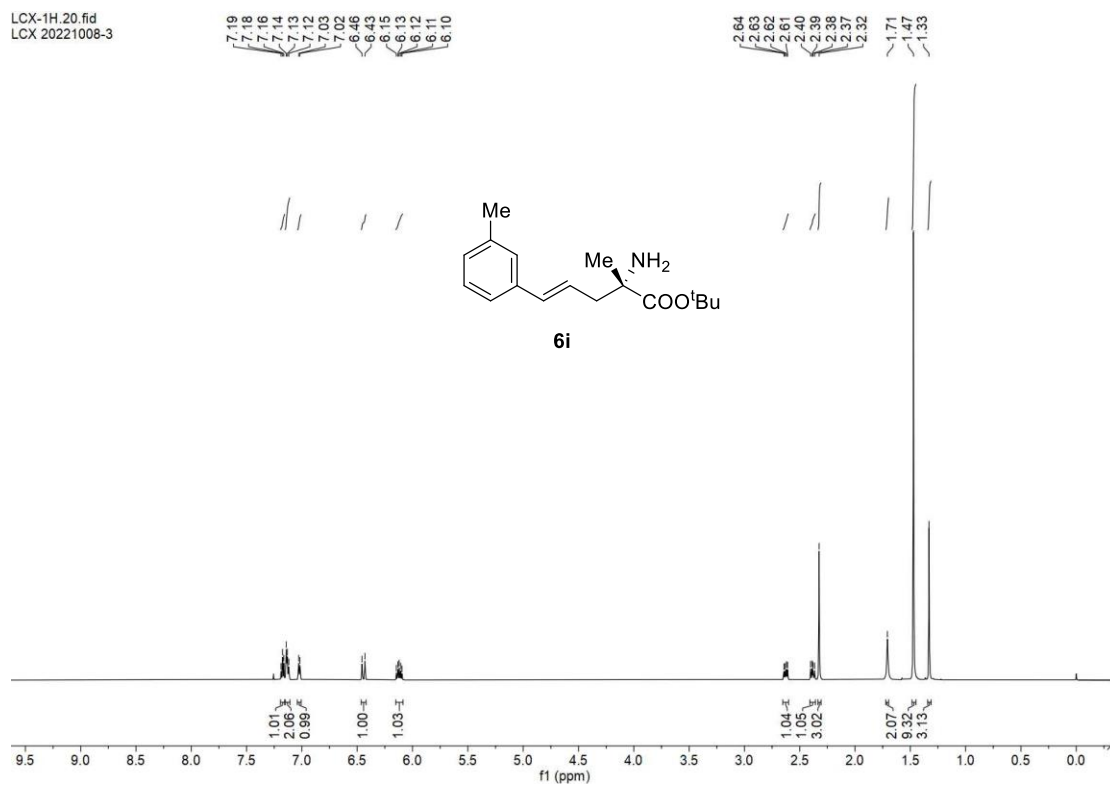

LCX-13C.10.fid  
LCX 20221008-3

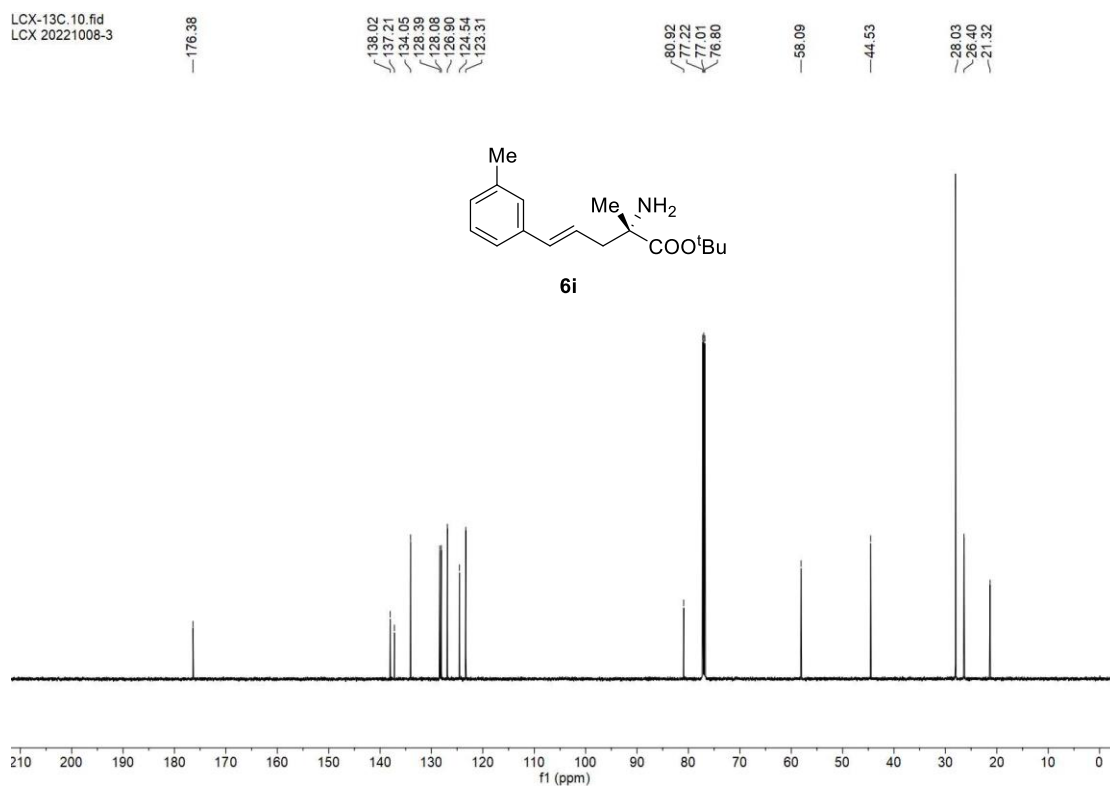

LCX-1H.22.fid  
LCX 20221008-4

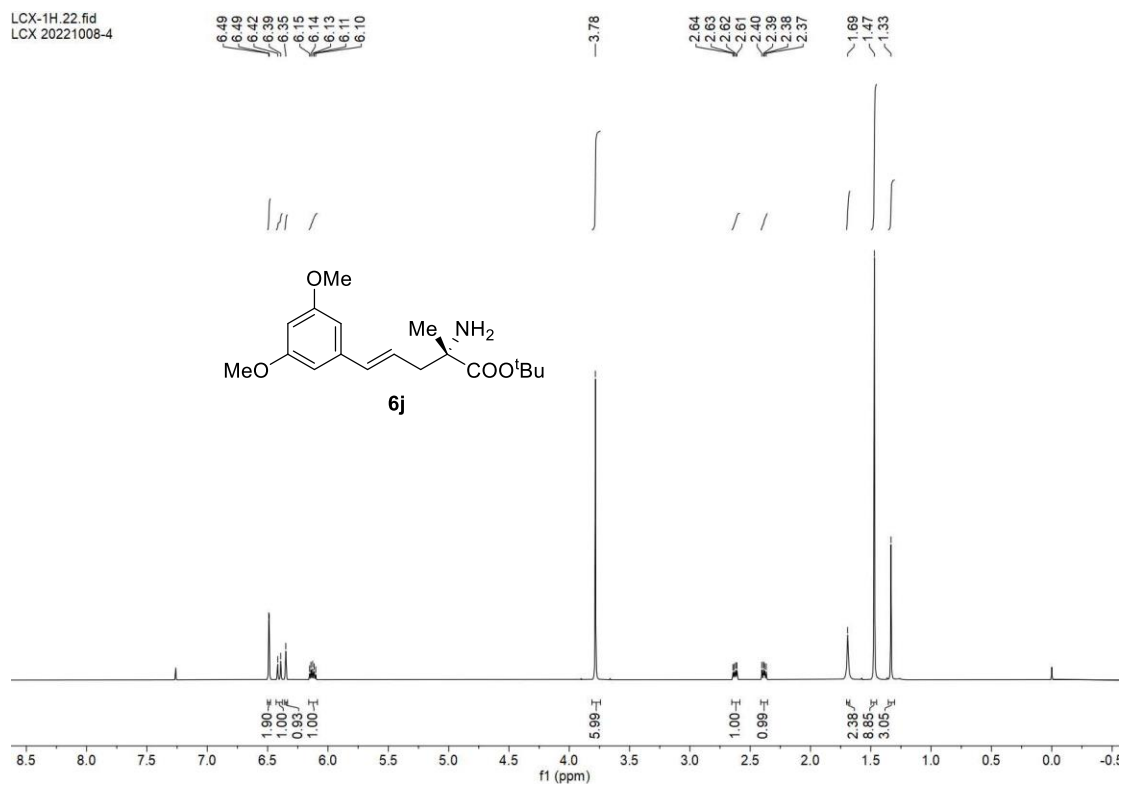

LCX-13C.12.fid  
LCX 20221008-4

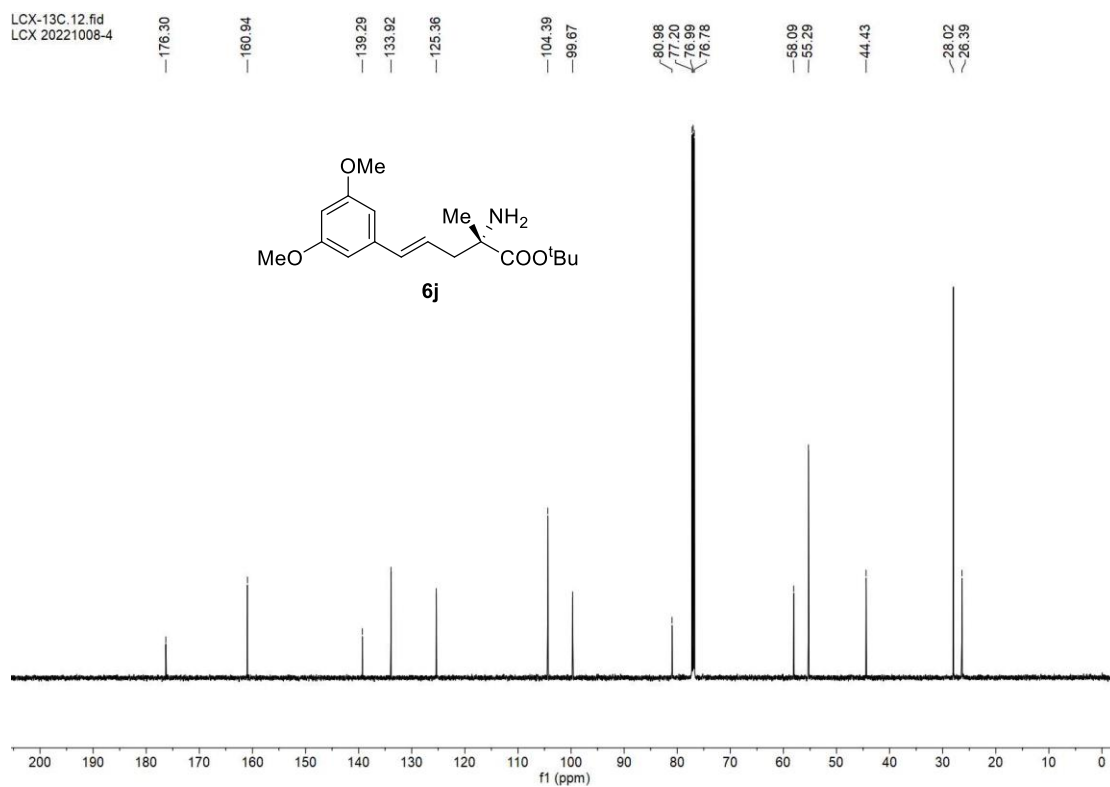



LCX-1H.19.fid  
LCX 20221007-1

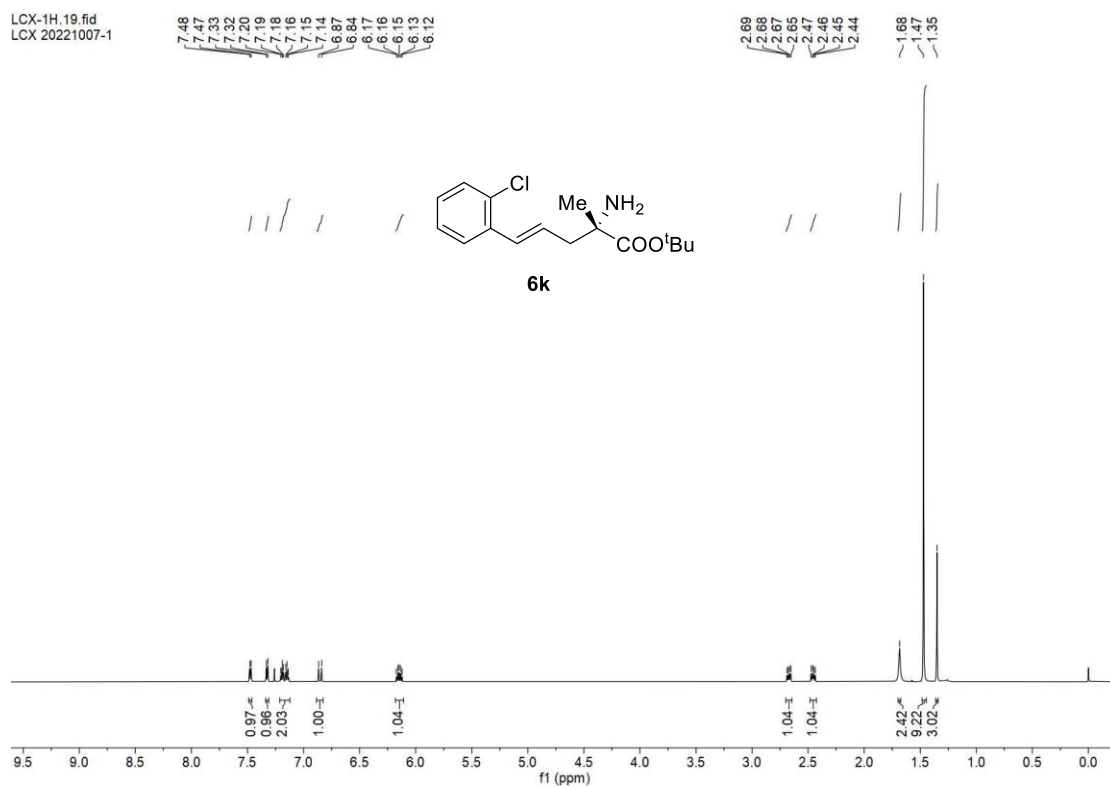

LCX-13C.9.fid  
LCX 20221007-1

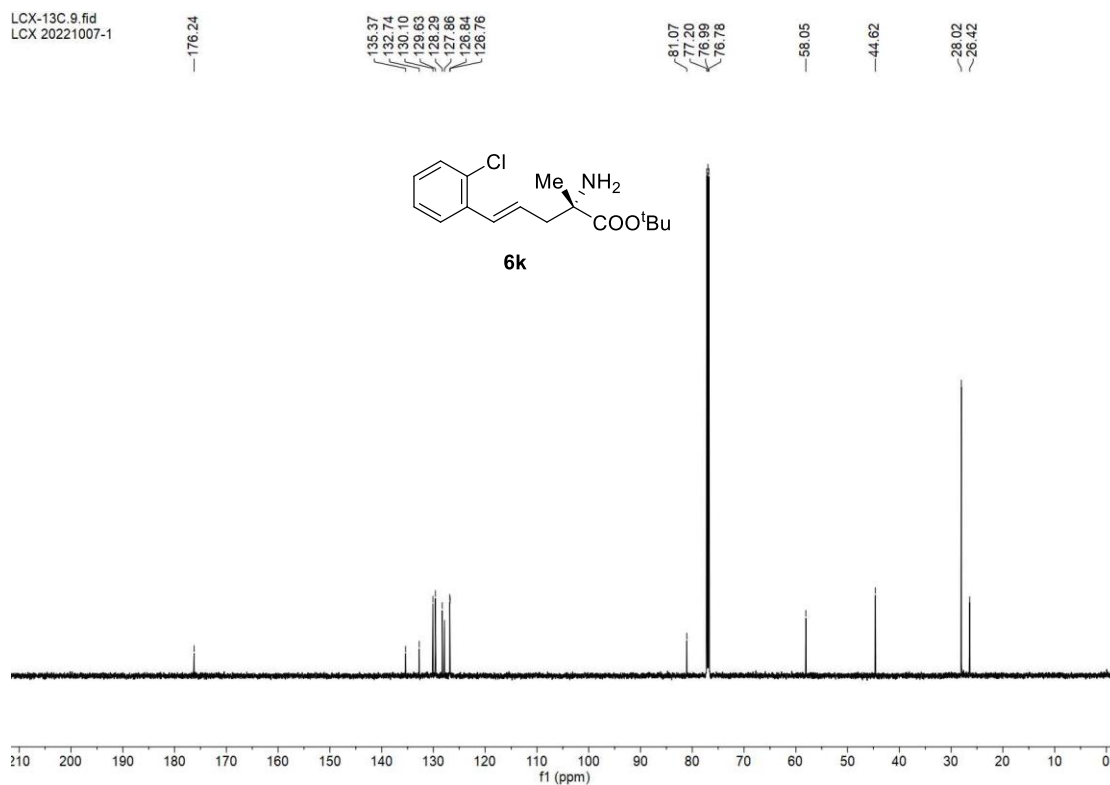

SHR-1H.77.fid  
SHR2209-22-4

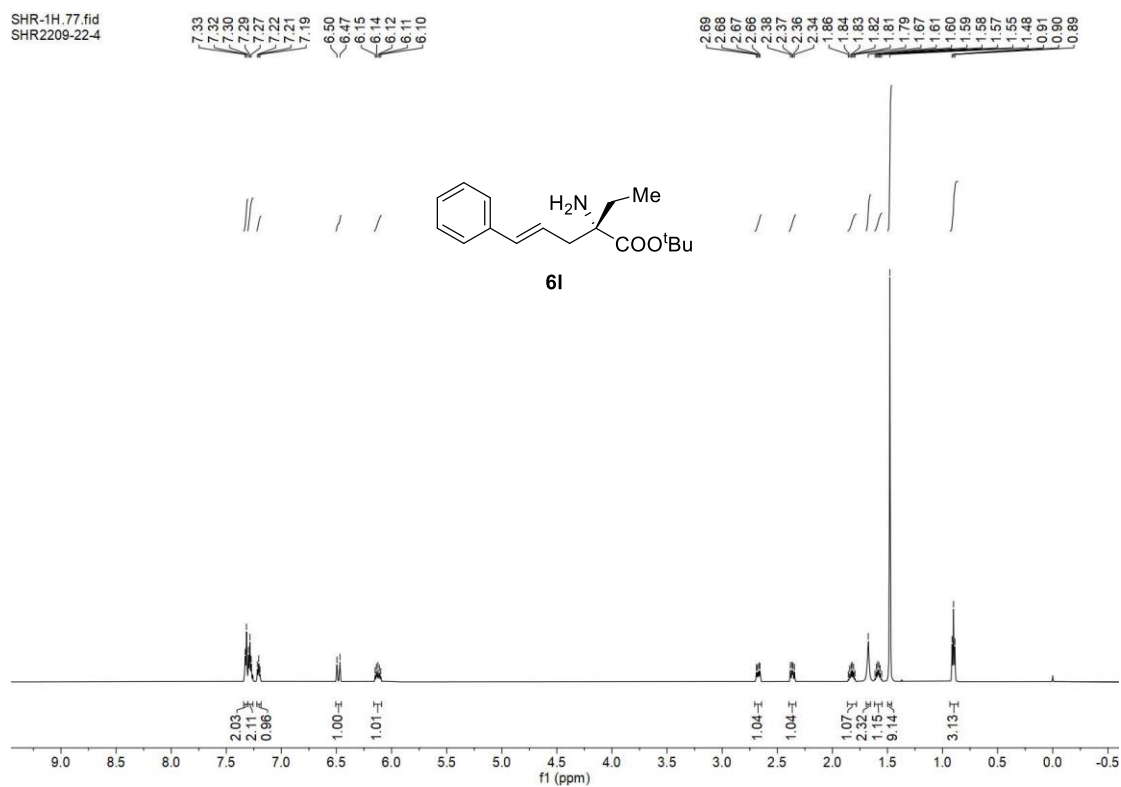

SHR-13C.18.fid  
SHR2209-22-4

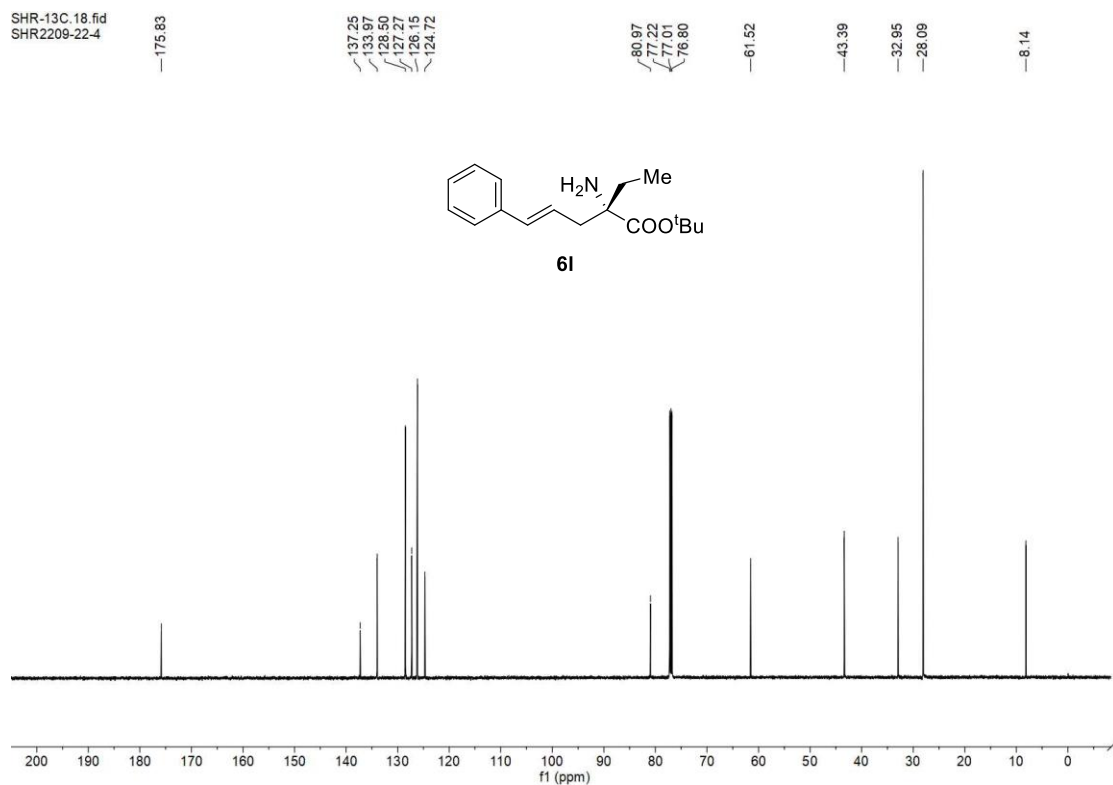

LCX-1H.24.fid  
LCX 20221006-3

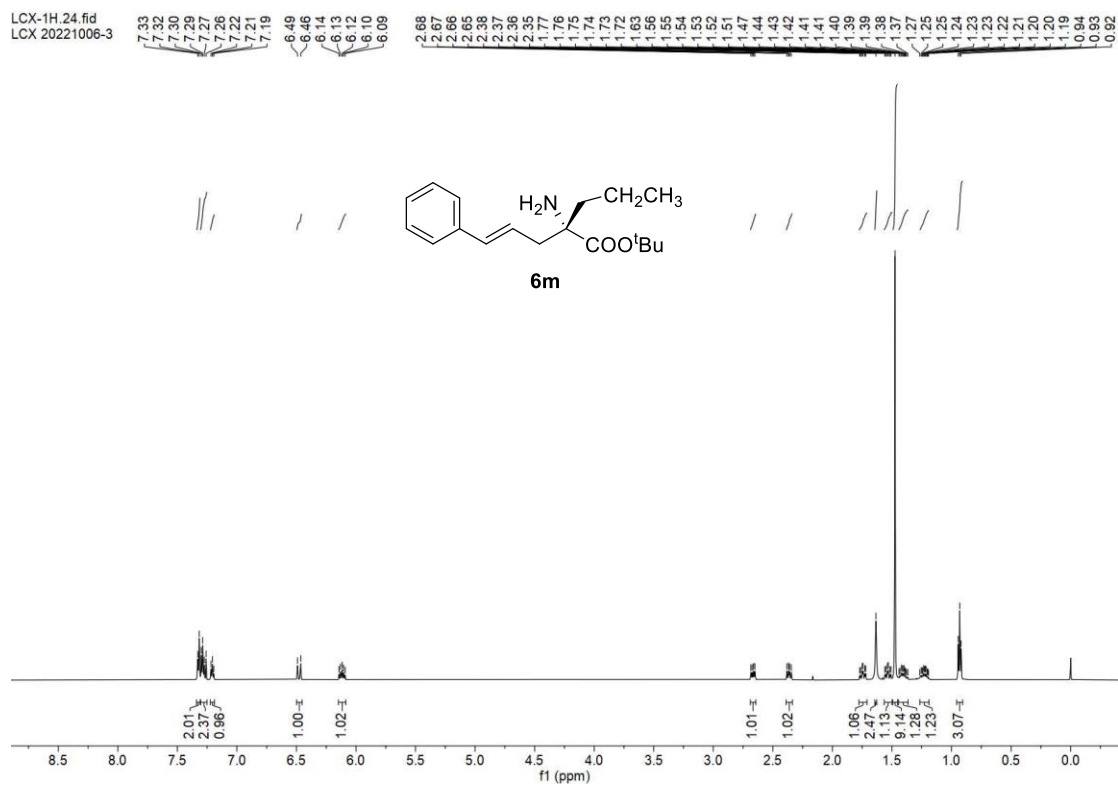

LCX-13C.14.fid  
LCX 20221006-3

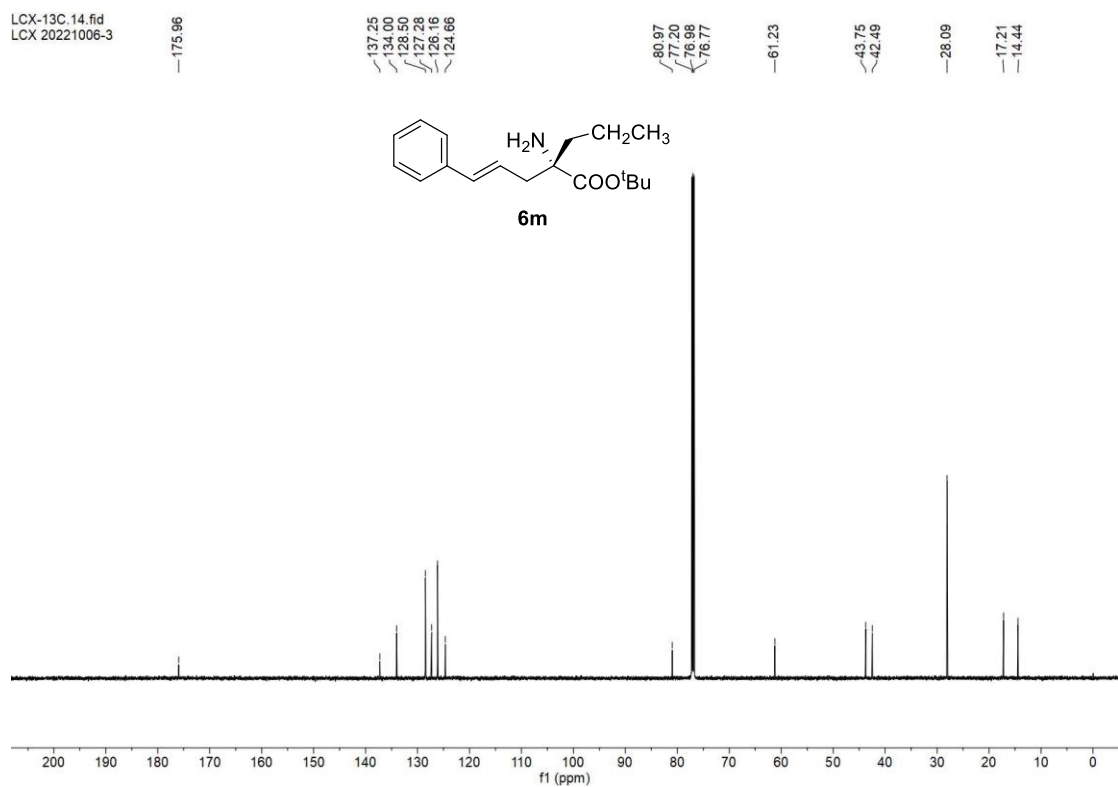

SHR-1H.78.fid  
SHR2209-22-5

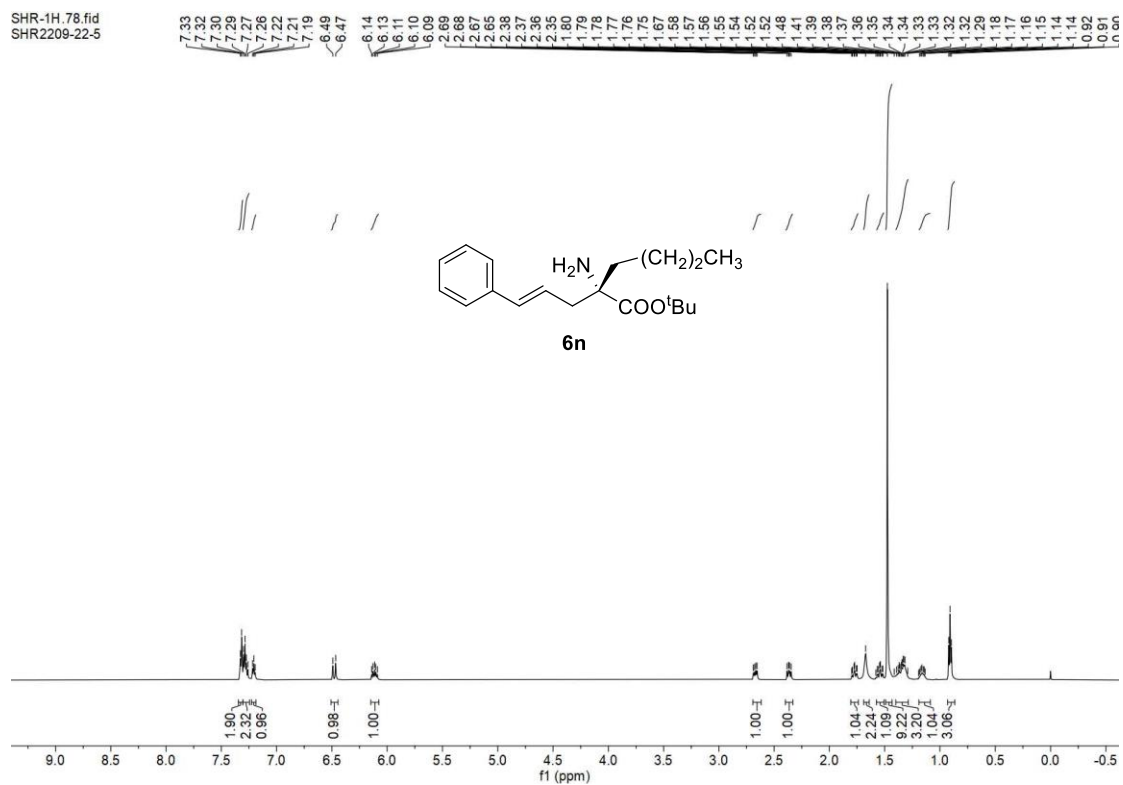

SHR-13C.19.fid  
SHR2209-22-5

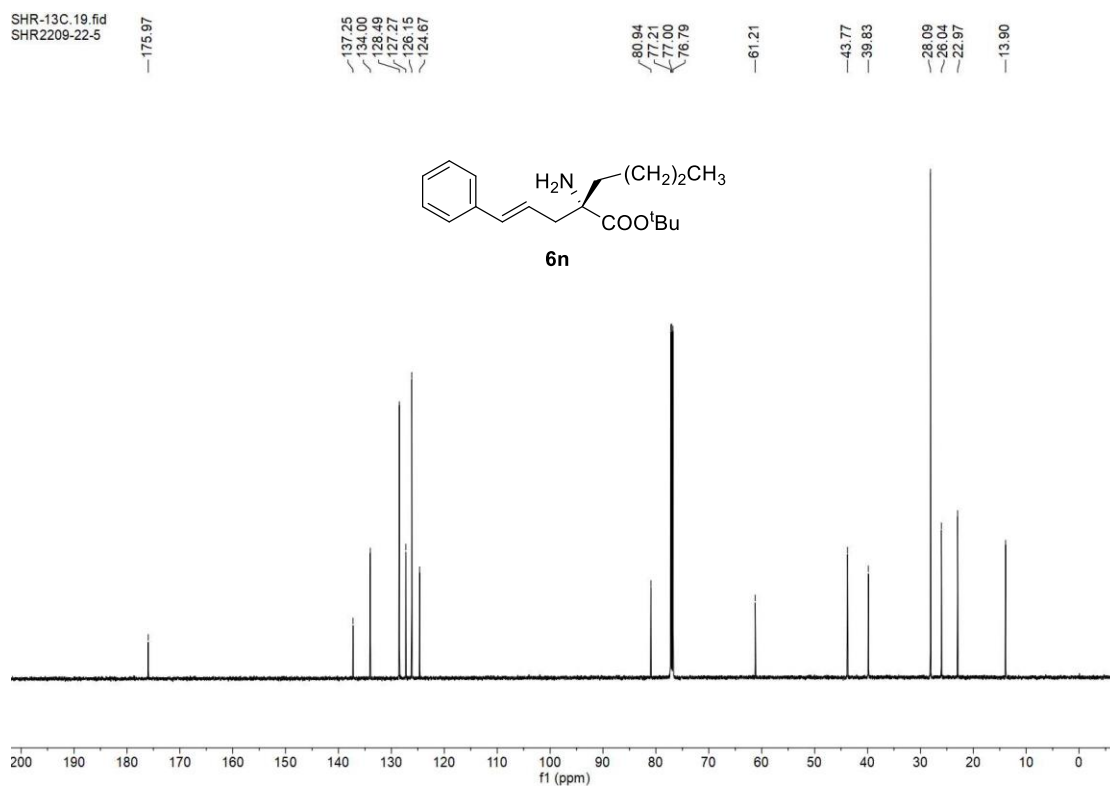

SHR-1H.97.fid  
SHR2209-29-2

7.32  
7.31  
7.29  
7.28  
7.27  
7.21  
7.20  
7.19  
6.49  
6.46  
6.14  
6.13  
6.12  
6.10  
6.09  
2.68  
2.67  
2.65  
2.64  
2.38  
2.37  
2.36  
2.34  
1.76  
1.75  
1.74  
1.73  
1.67  
1.56  
1.55  
1.54  
1.53  
1.52  
1.51  
1.47  
1.40  
1.34  
1.33  
1.32  
1.31  
1.30  
1.29  
1.28  
1.27  
1.27  
1.27  
1.090  
1.089  
1.088

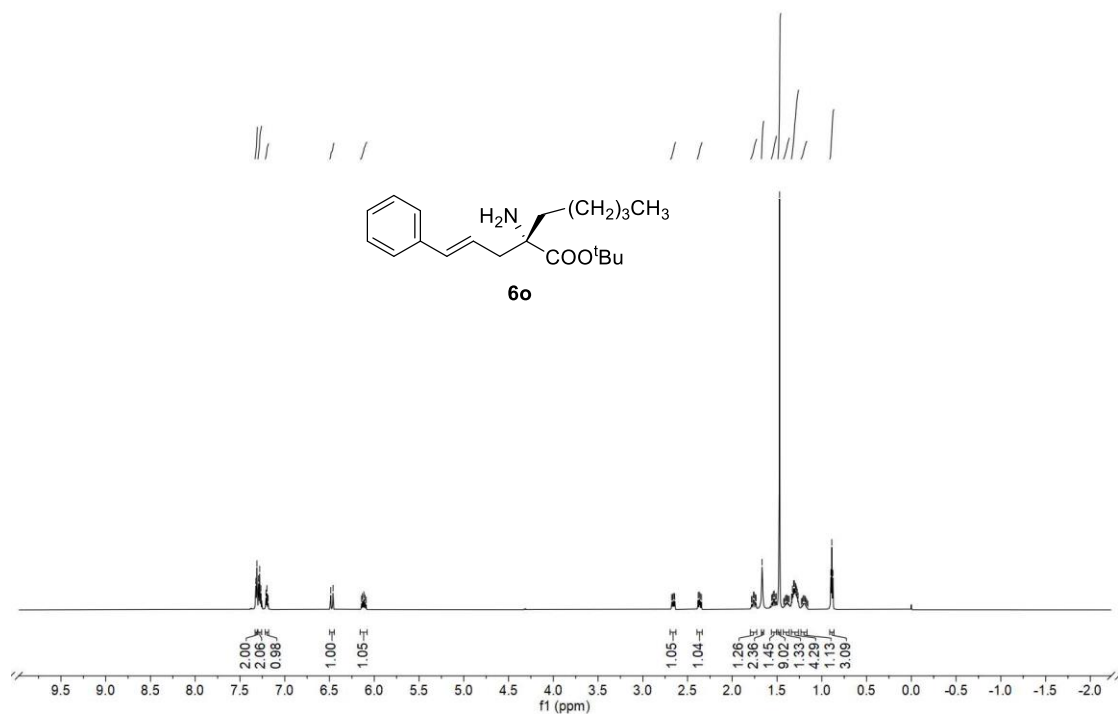

SHR-13C.41.fid  
SHR2209-29-2

175.97  
137.27  
133.99  
128.48  
127.26  
126.15  
124.67  
80.84  
61.25  
43.77  
40.12  
32.09  
28.09  
23.49  
22.42  
13.89

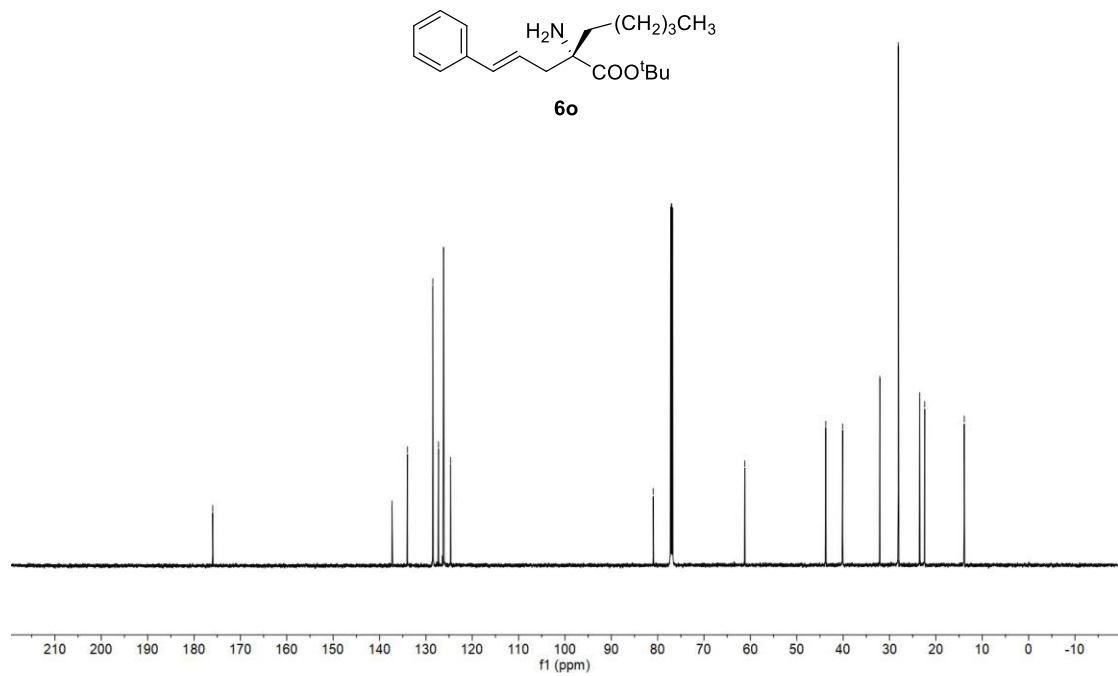

LCX-1H.18.fid  
LCX20221001-2

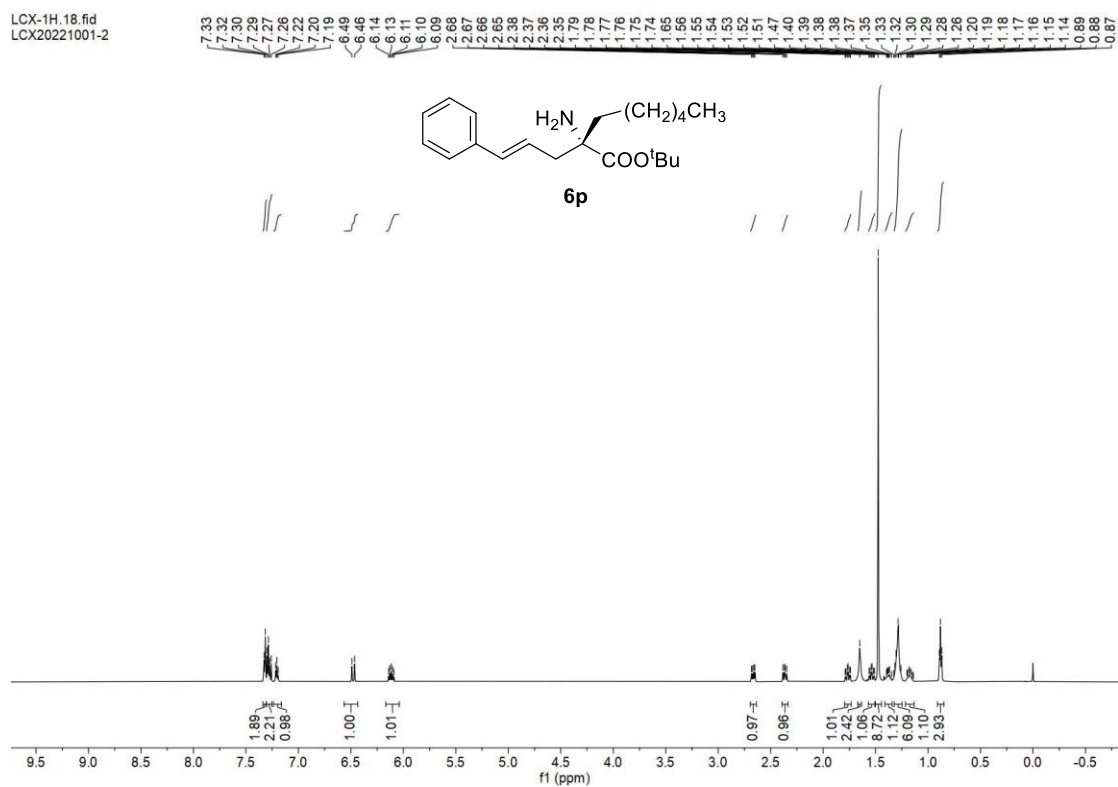

LCX-13C.8.fid  
LCX20221001-2

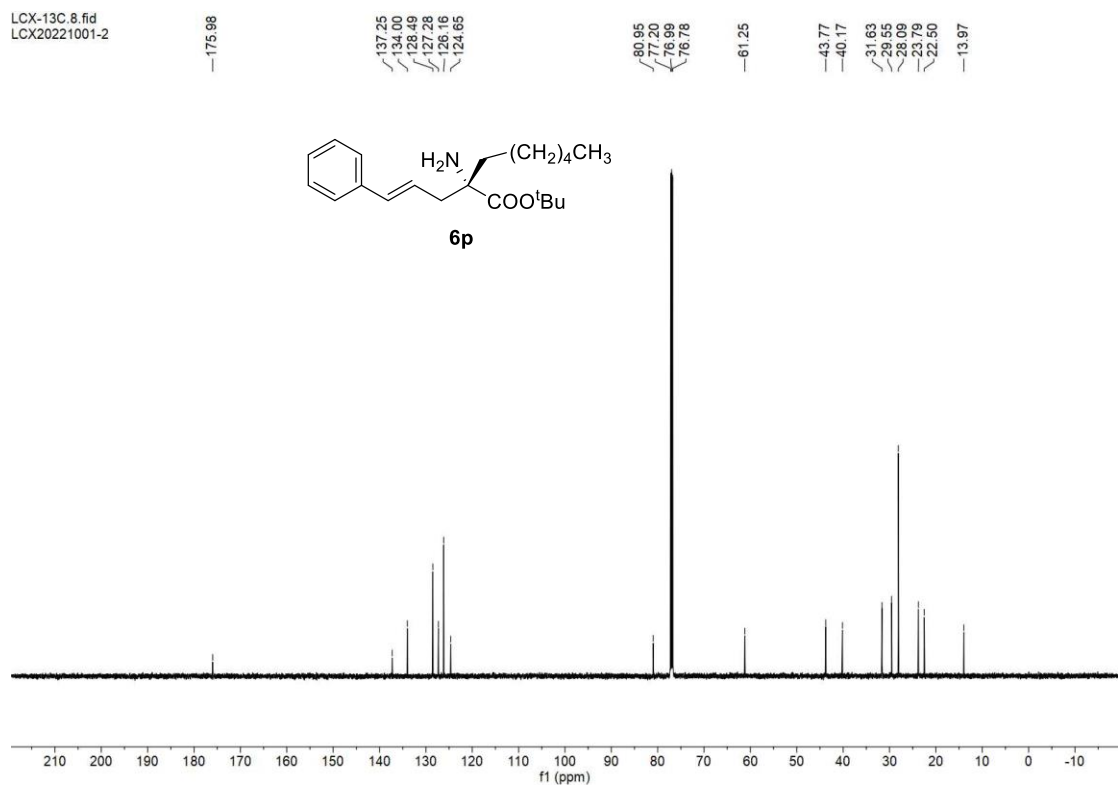

LZX-1H, 11.fid  
LZX-20220928-3

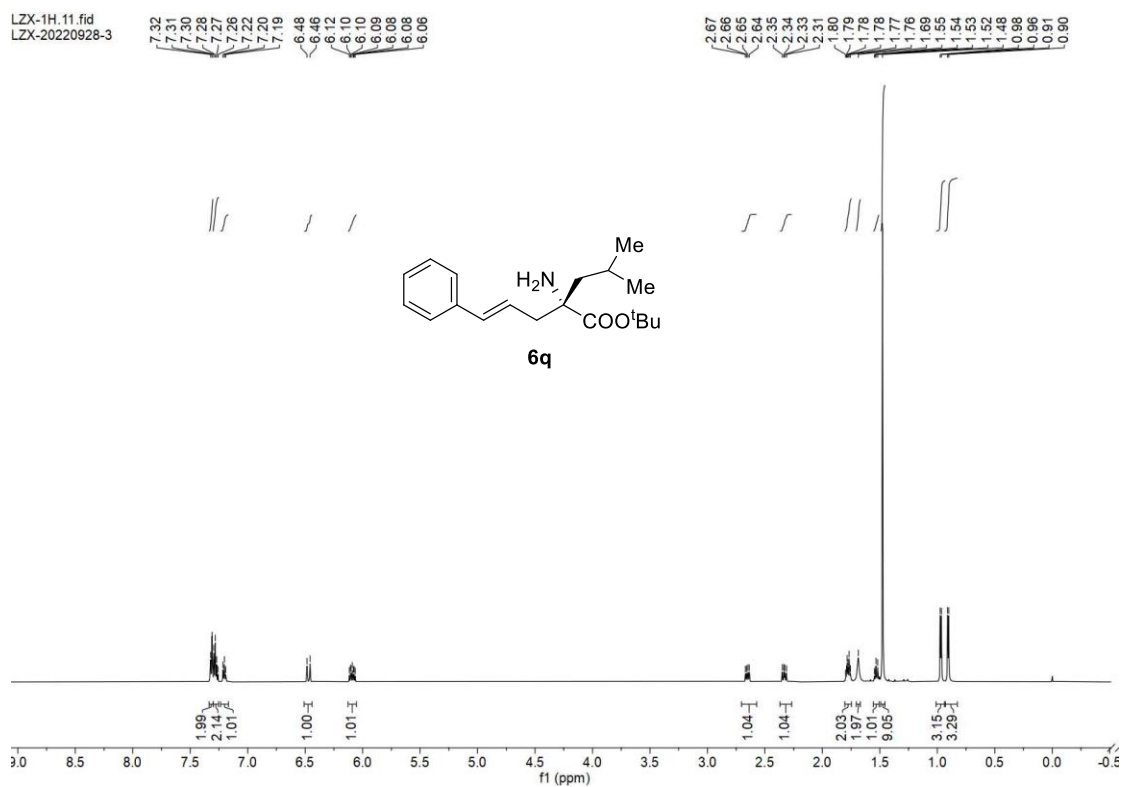

LZX-13C, 2.fid  
LZX-20220928-3

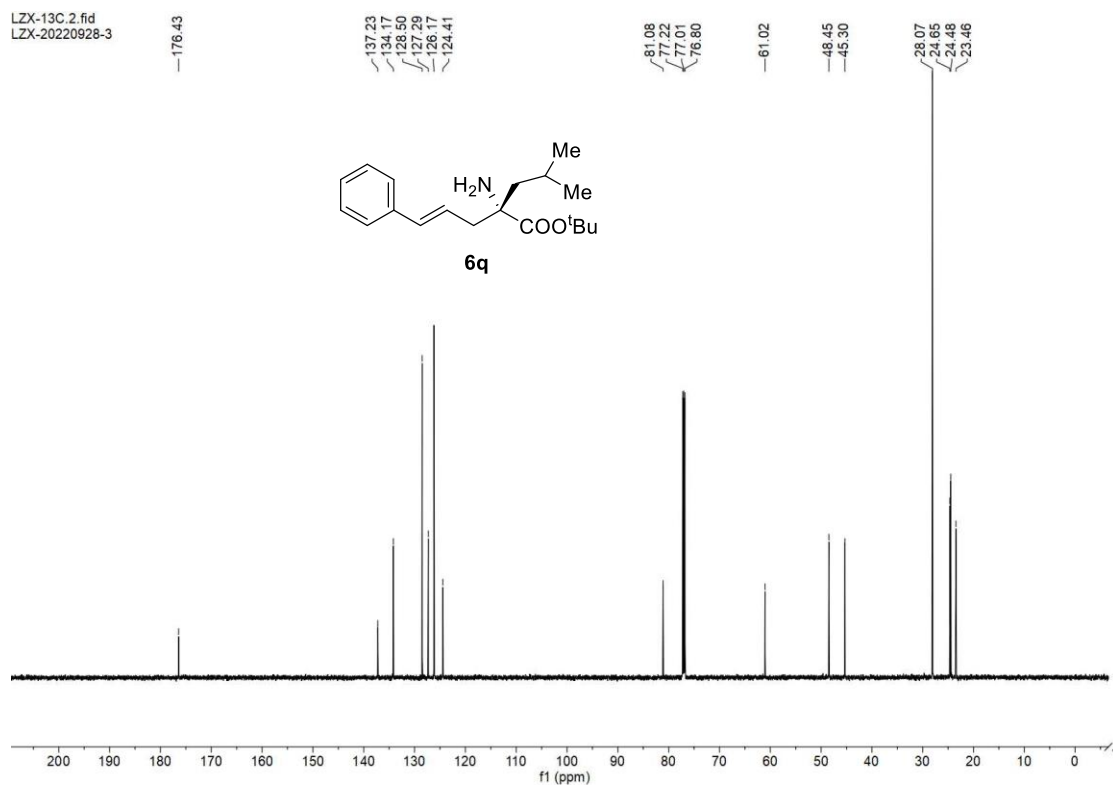

LCX-1H.15.fid  
LCX20220928-2

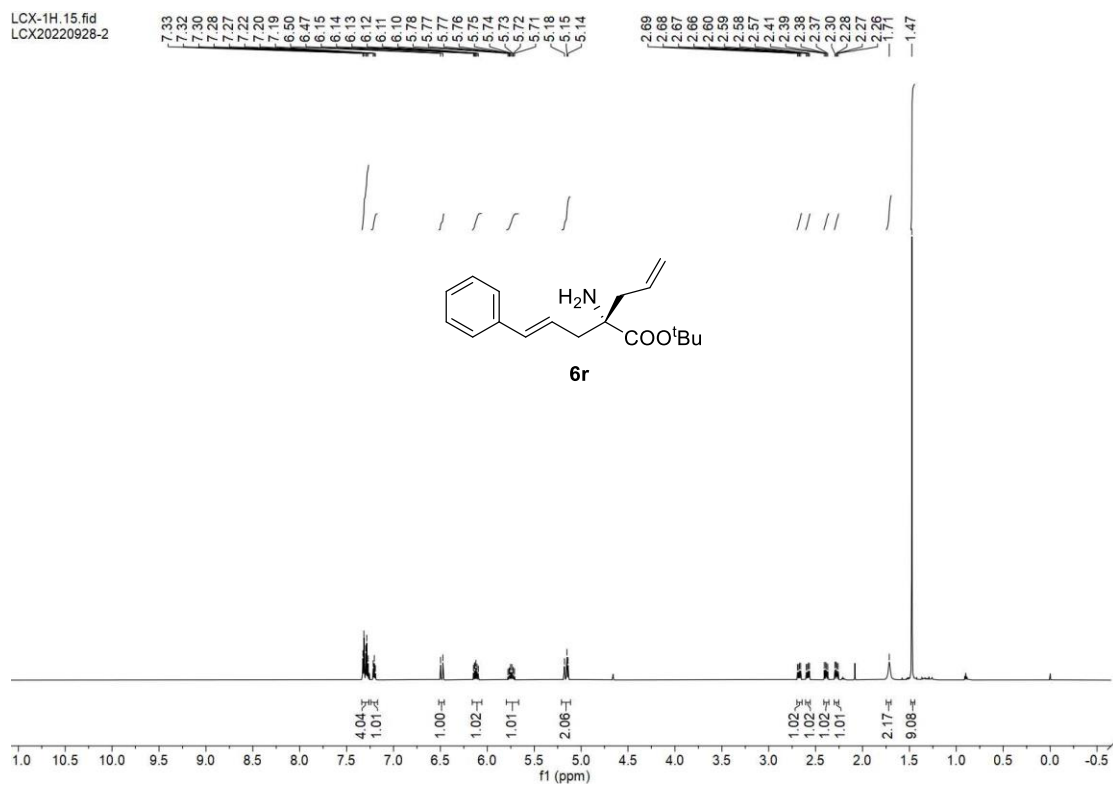

LCX-13C.5.fid  
LCX20220928-2

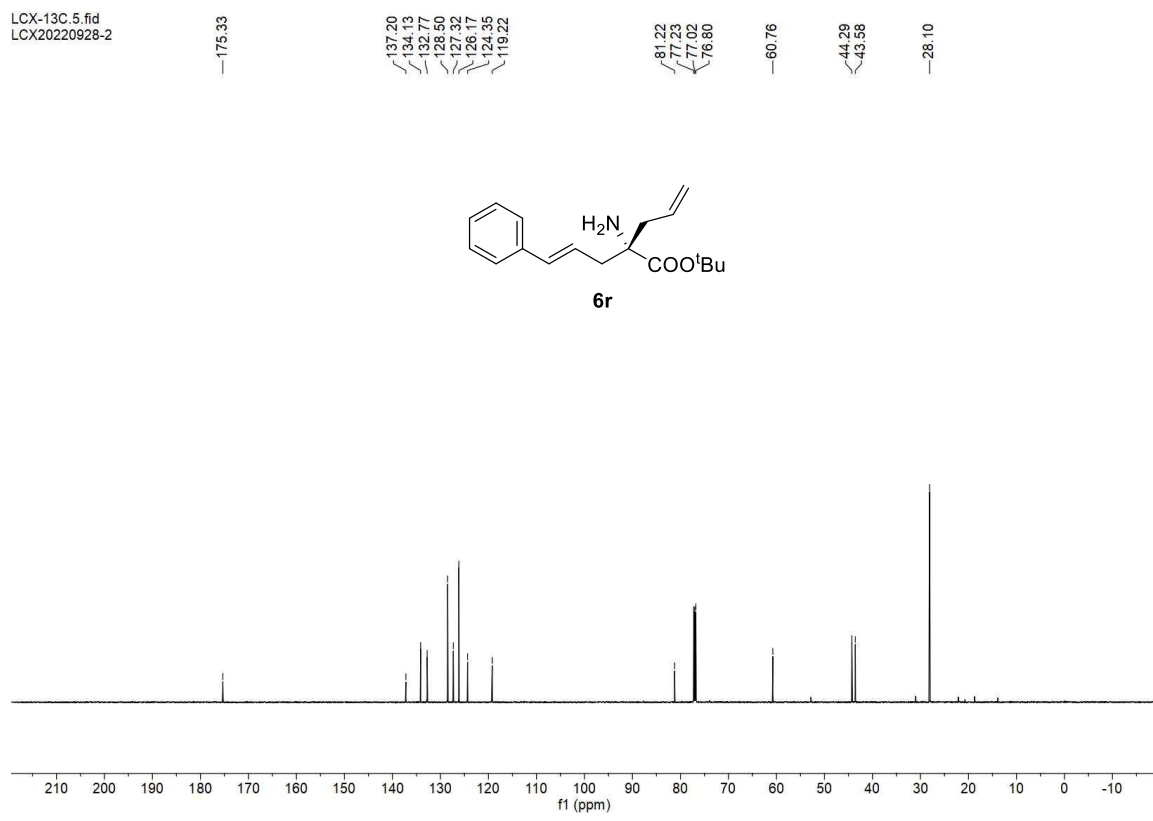



LCX-1H.16.fid  
LCX20220929-2

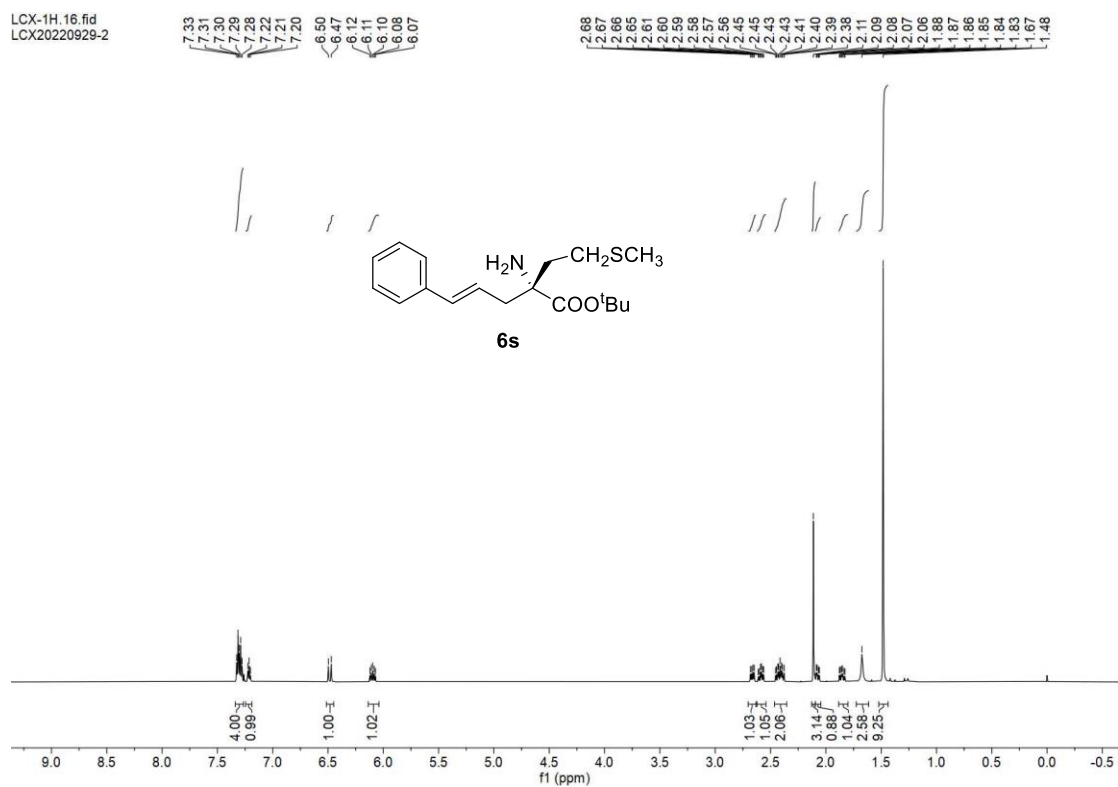

LCX-13C.6.fid  
LCX20220929-2

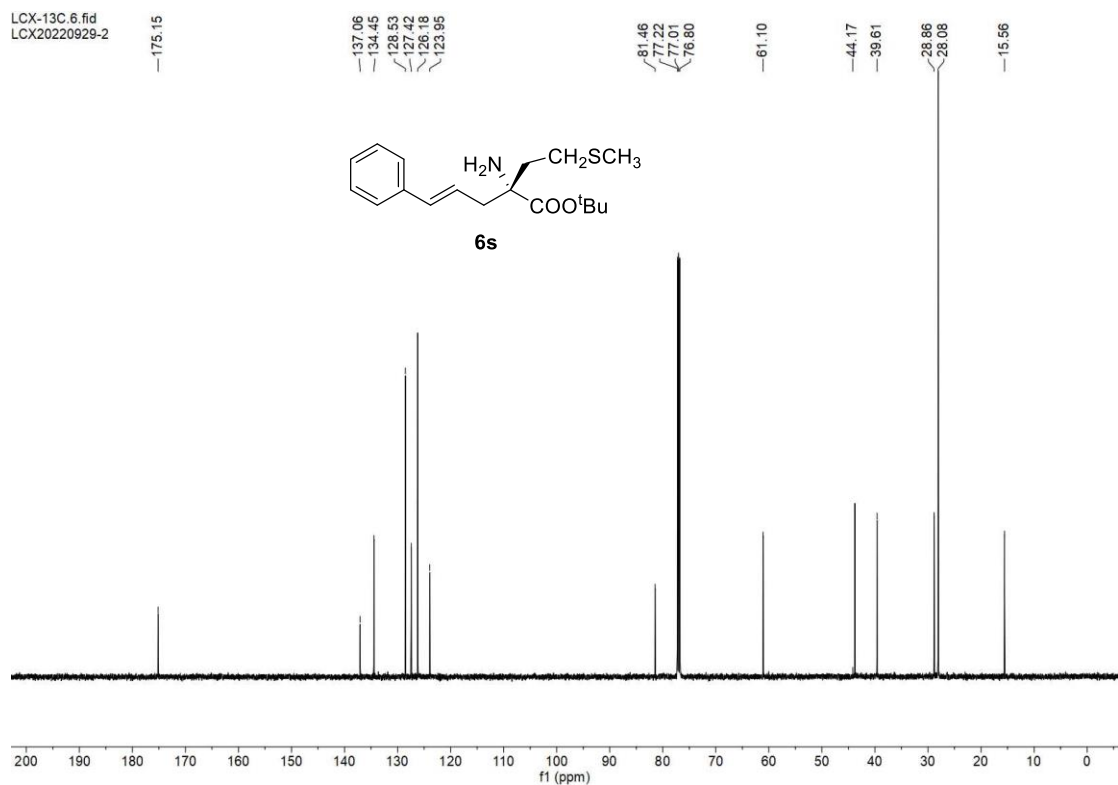

SHR-1H.95.fid  
SHR2210-19-3

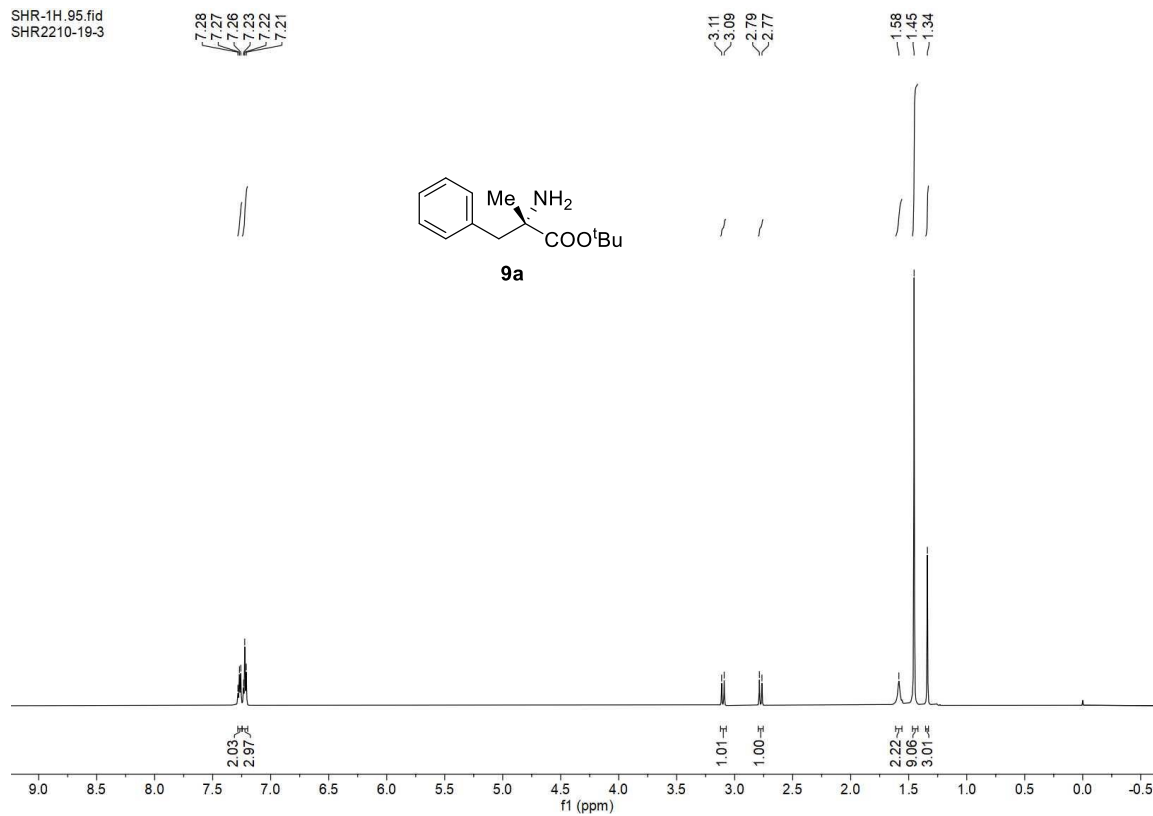

SHR-13C.95.fid  
SHR2210-19-3

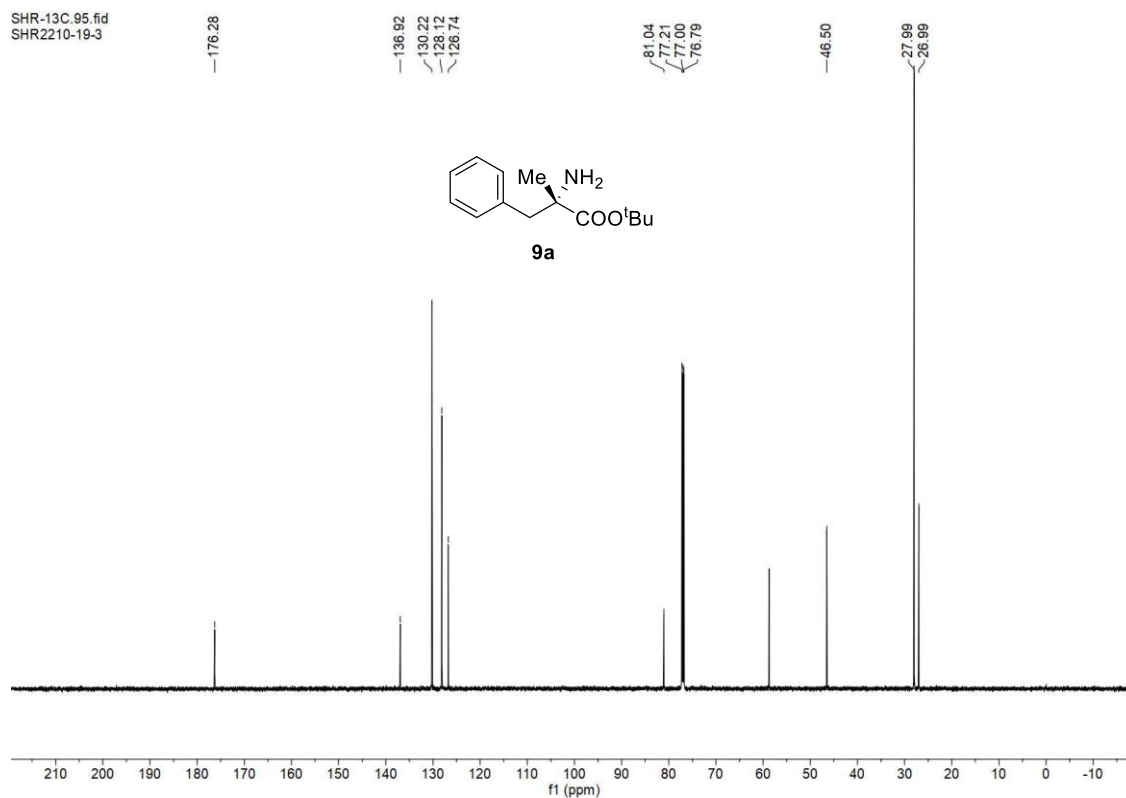

LCX-1H.9.fid  
LCX-20220711-2

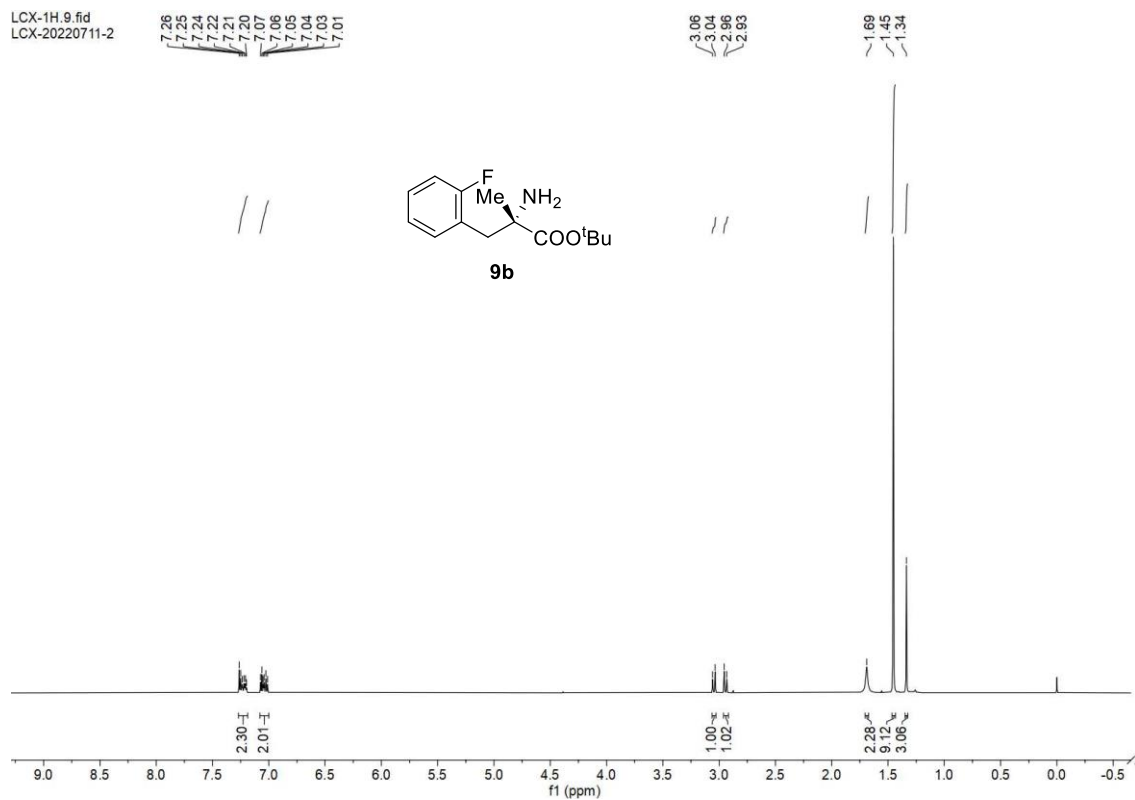

LCX-13C.2.fid  
LCX20220711-2

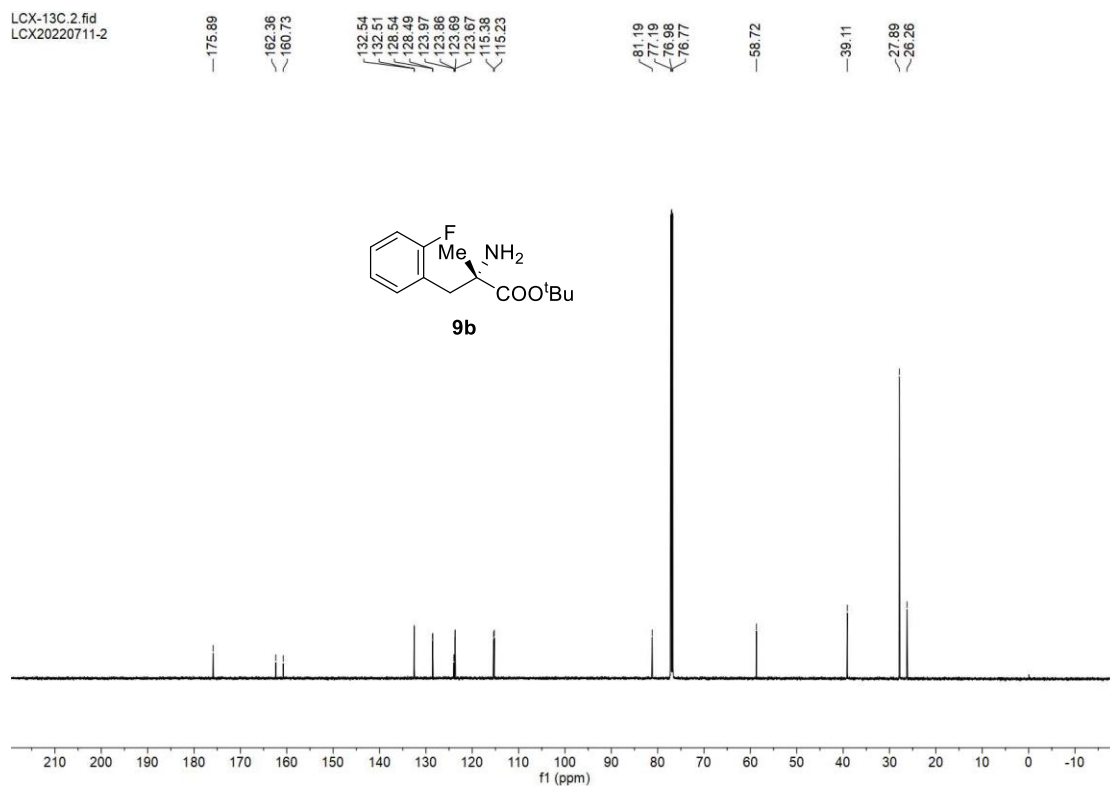

LCX-1H.7.fid  
LCX-20220714-4

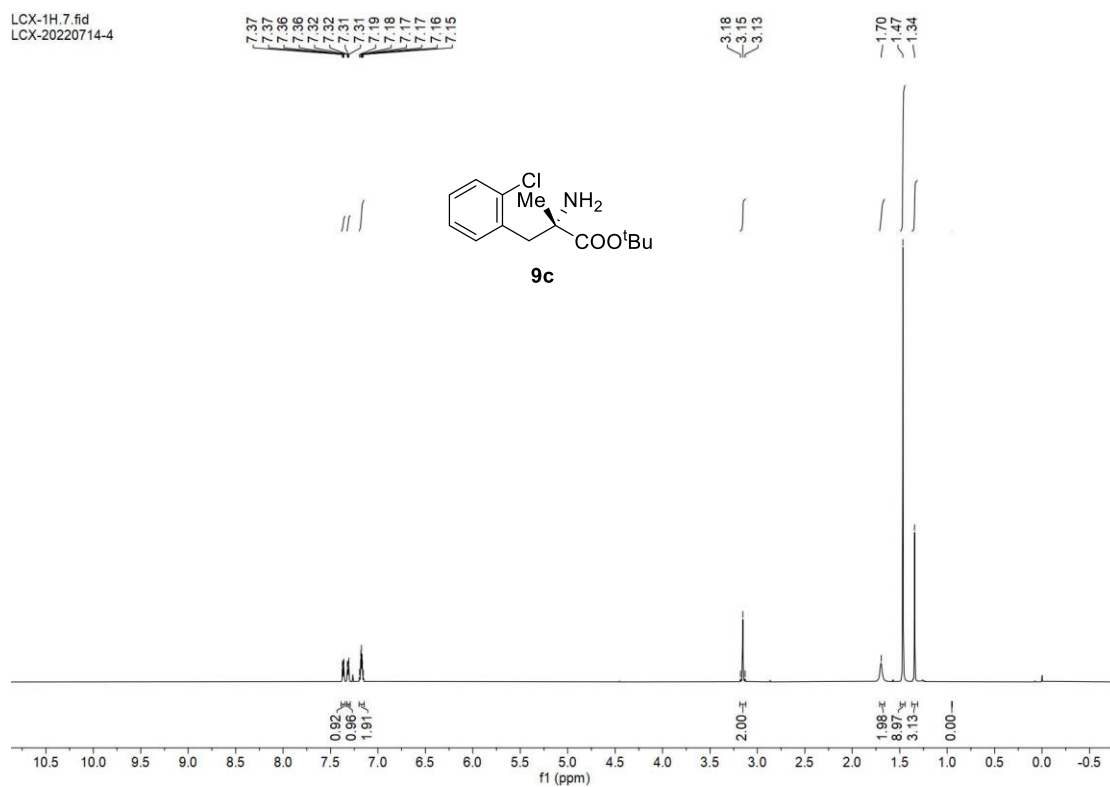

LCX-13C.1.fid  
LCX20220714-4

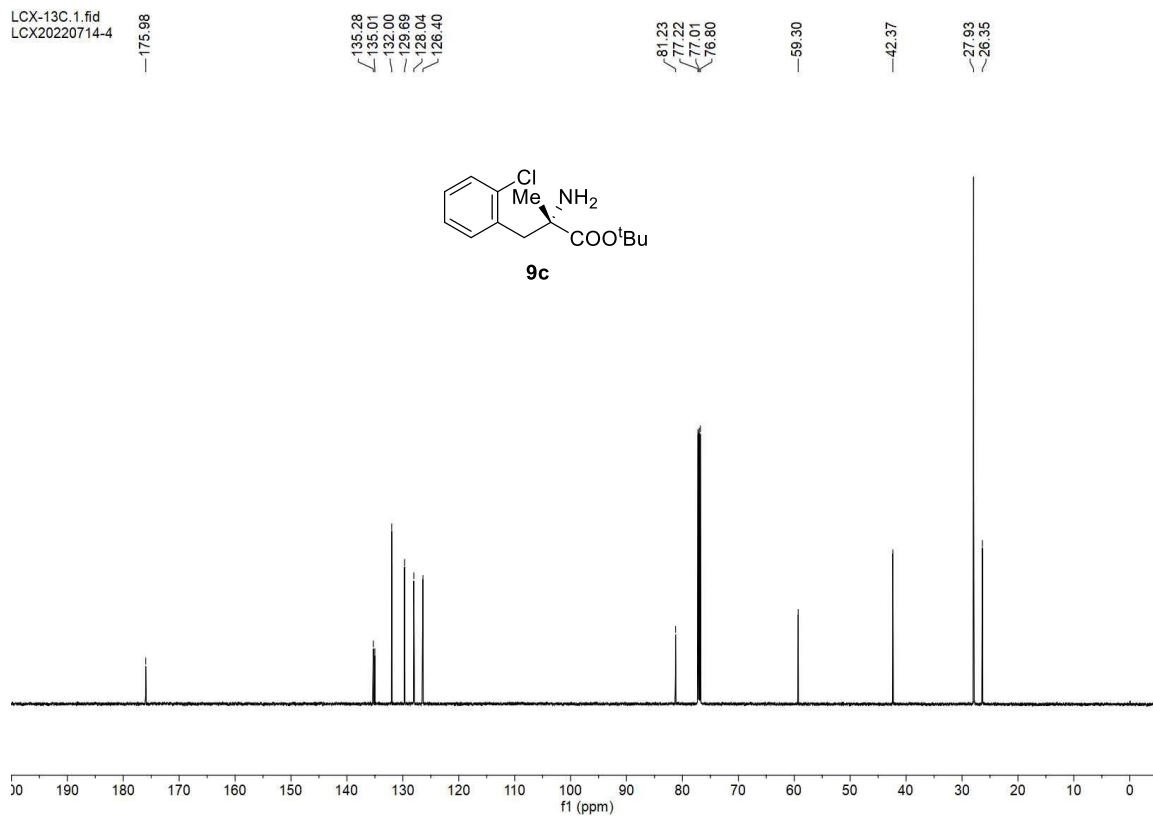

SHR-1H.93.fid  
SHR2210-16-3

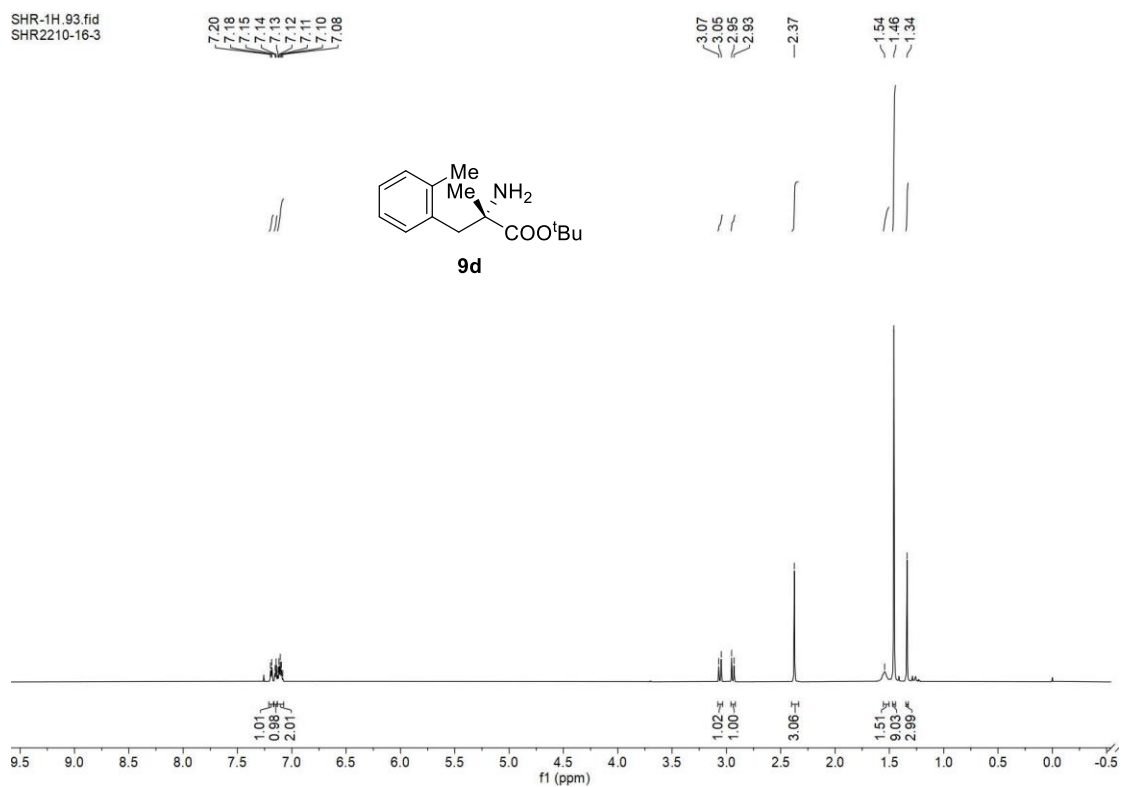

SHR-13C.93.fid  
SHR2210-16-3

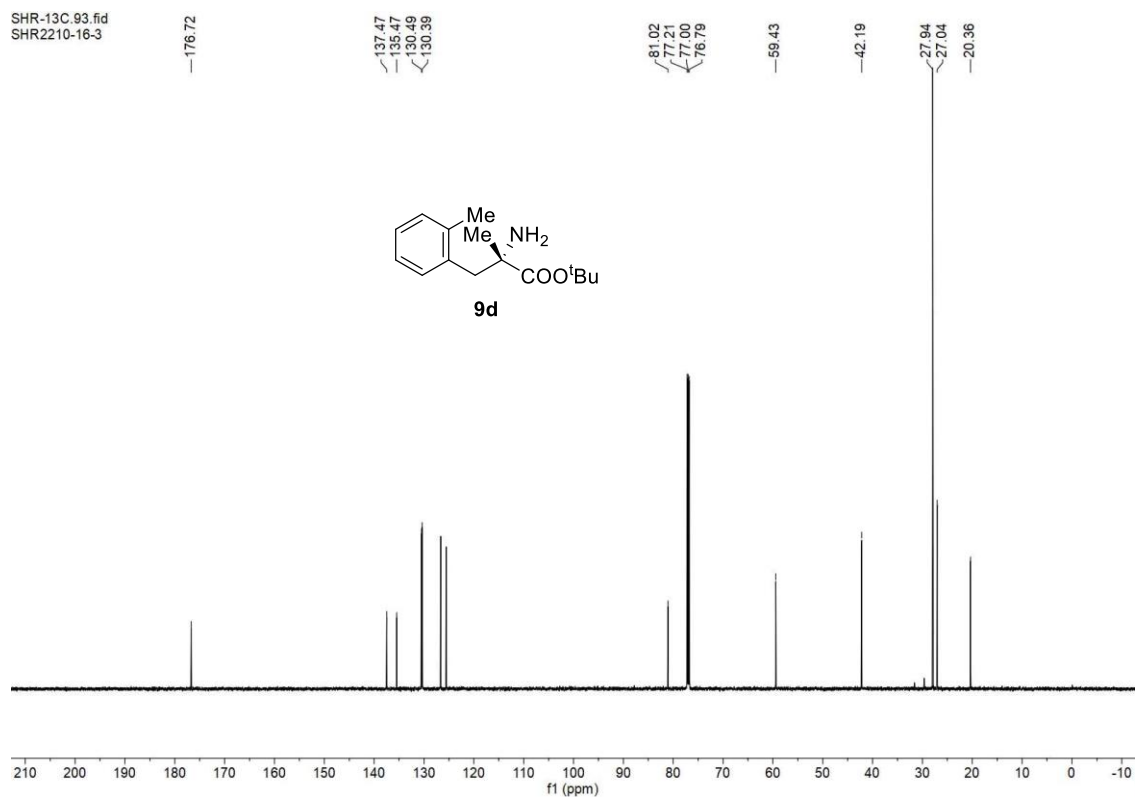

LCX-1H.6.fid  
LCX-20220714-3

7.27  
7.25  
7.24  
7.23  
7.21  
7.01  
7.00  
6.96  
6.94  
6.93  
6.92

3.10  
3.08  
2.79  
2.76

1.70  
1.46  
1.35

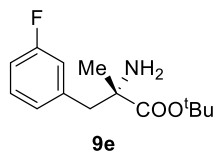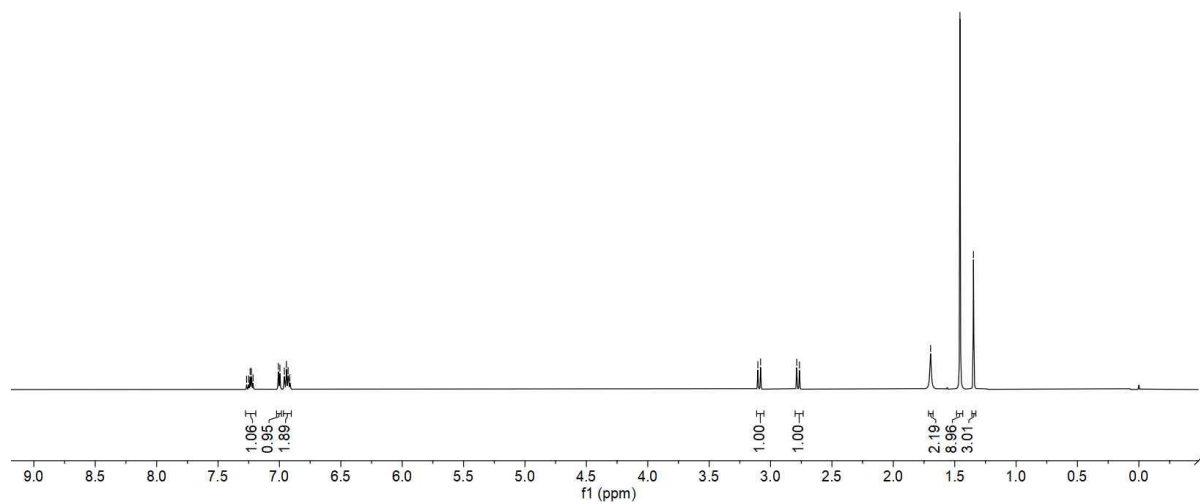

LZX-13C.10.fid  
lzx20220714-3

175.93

163.45  
161.83

139.44  
139.39  
129.53  
129.48  
125.91  
125.89  
117.13  
116.99  
113.74  
113.60

81.37  
77.20  
76.98  
76.77

58.77

46.10

26.91

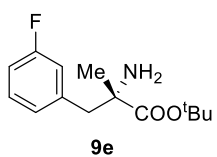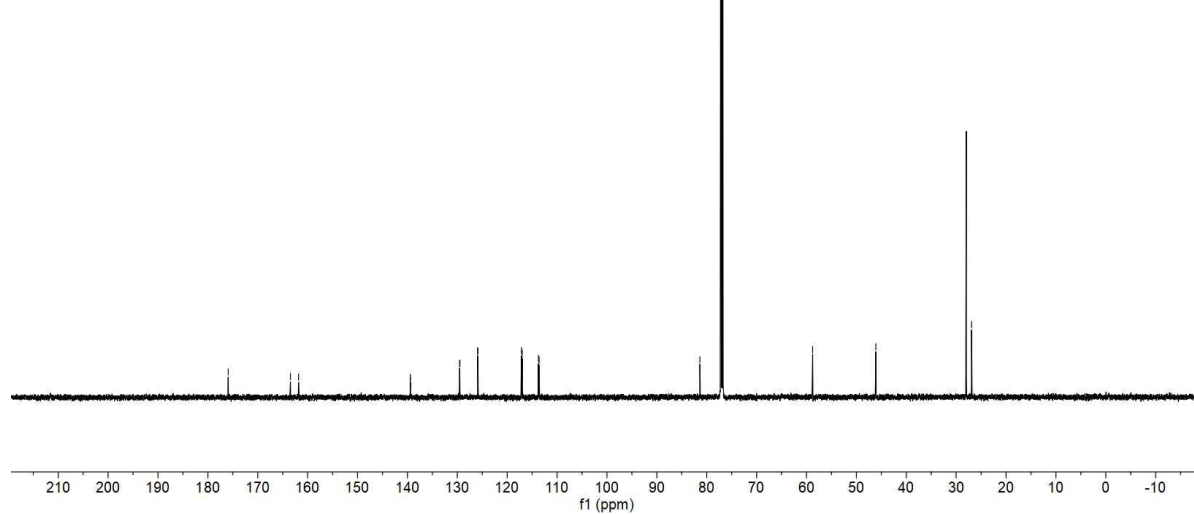

LCX-1H.31.fid  
LCX 20220710-2

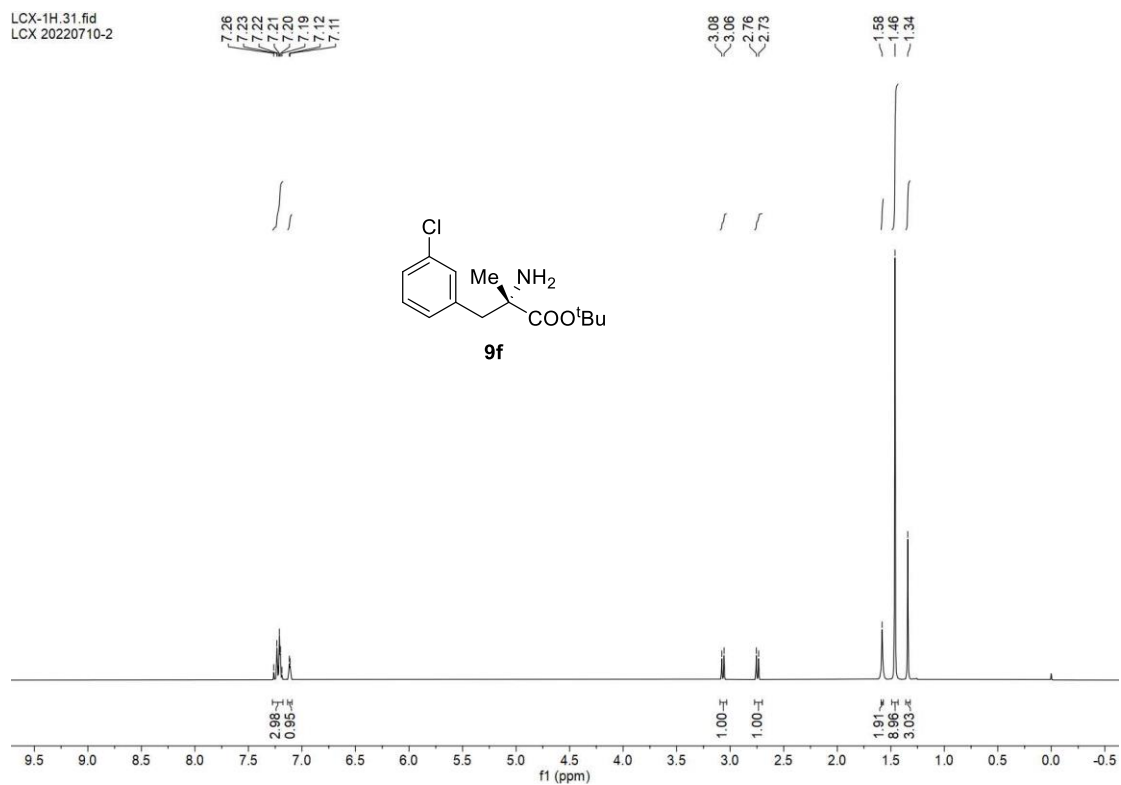

LCX-13C.16.fid  
LCX 20220710-2

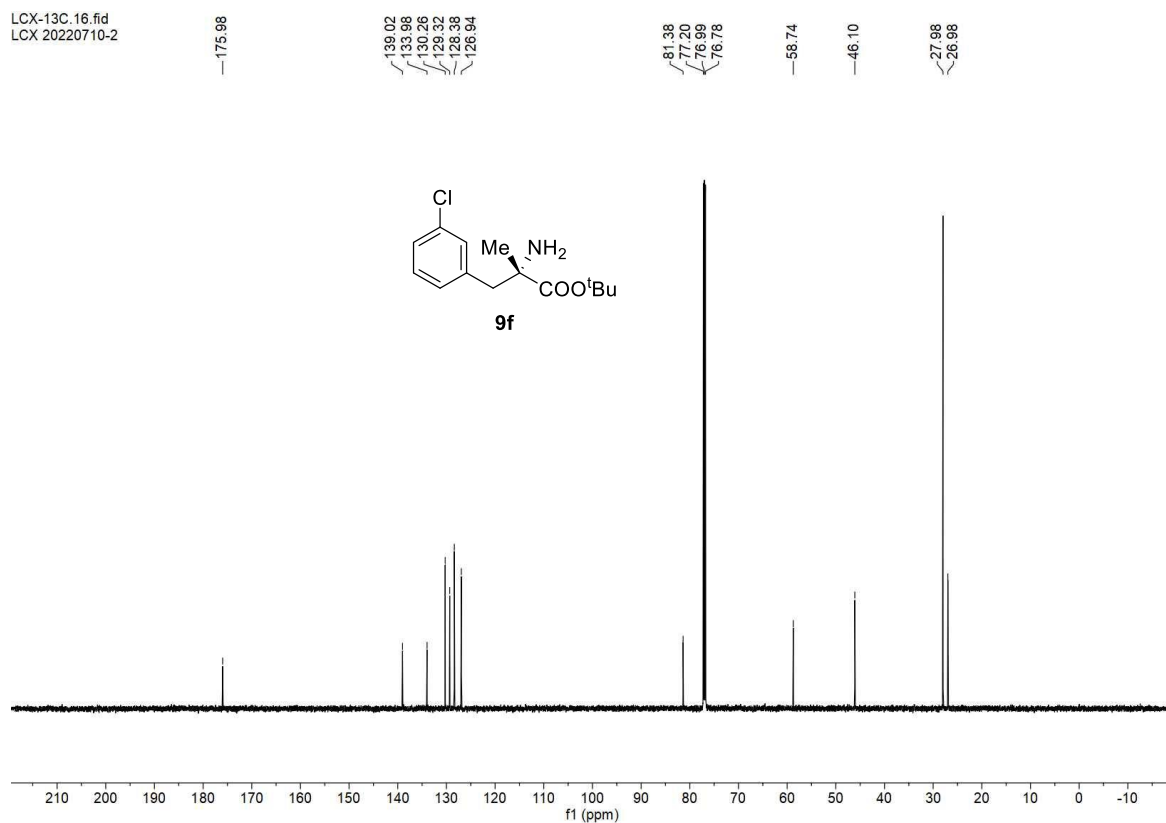

LCX-1H.4.fid  
LCX-20220712-1

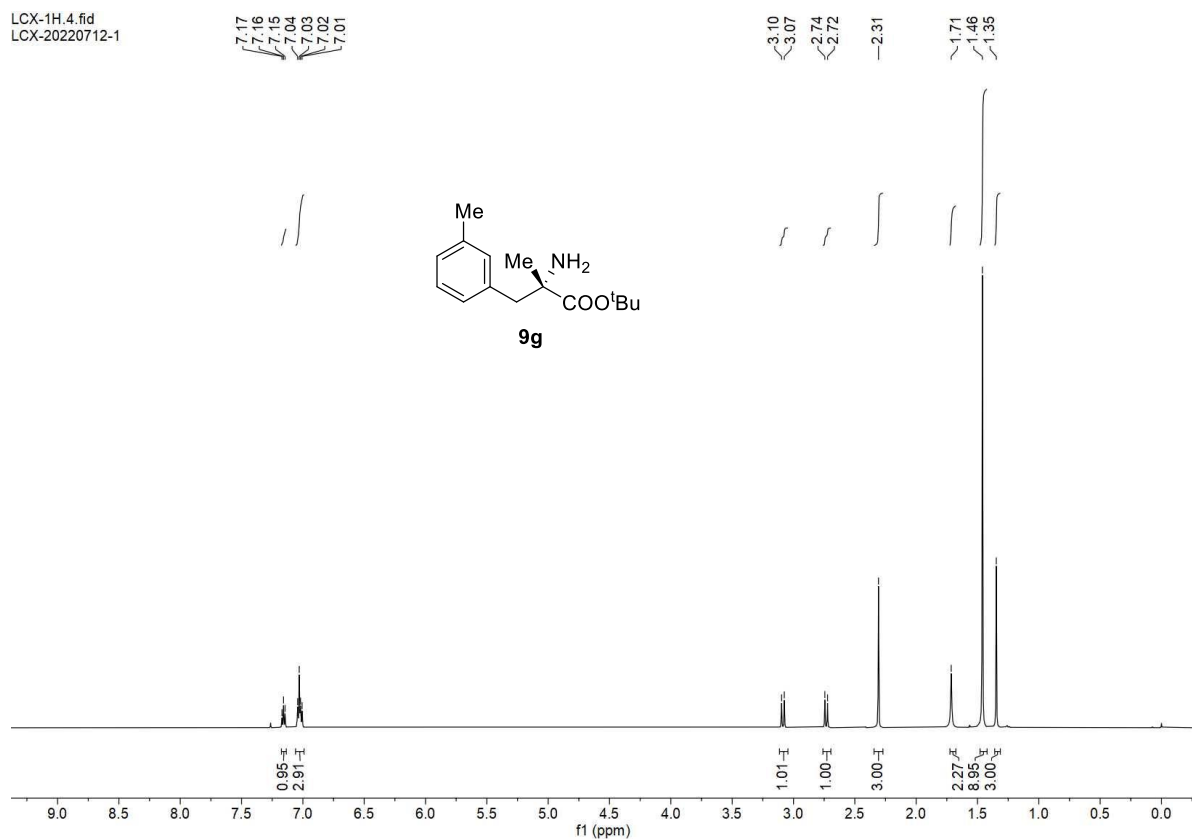

LZX-13C.9.fid  
lzx20220712-1

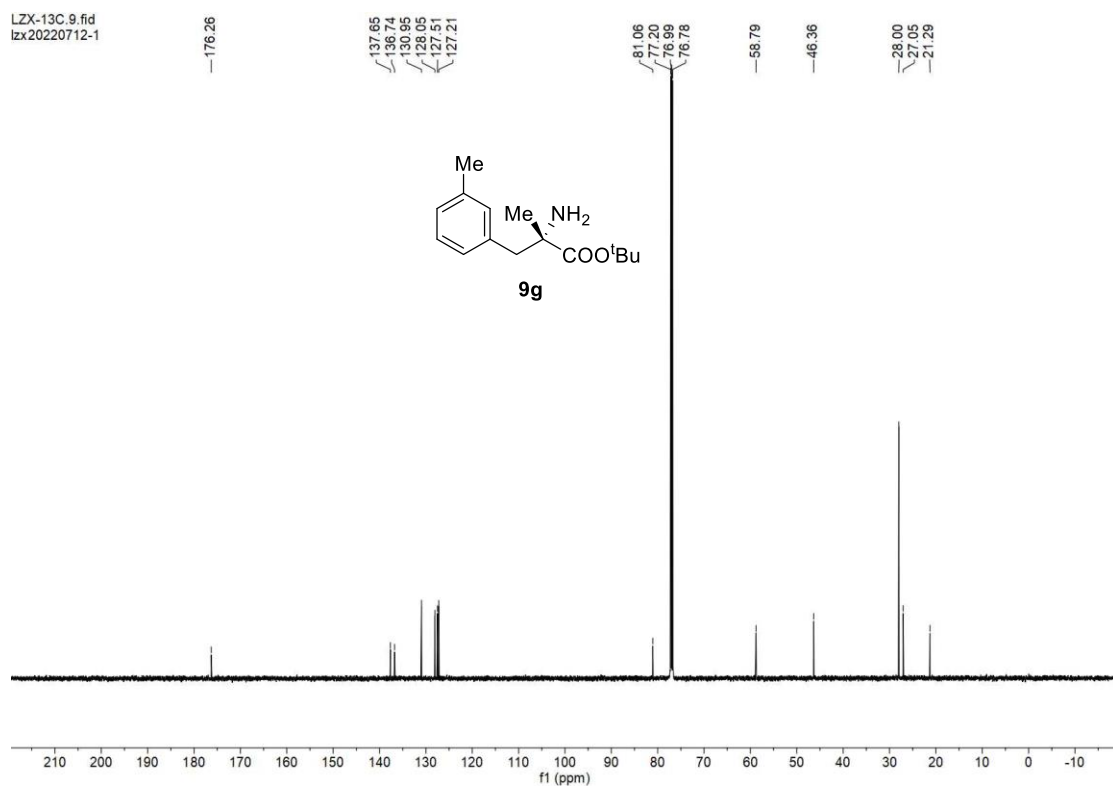



LCX-1H.5.fid  
LCX-20220712-2

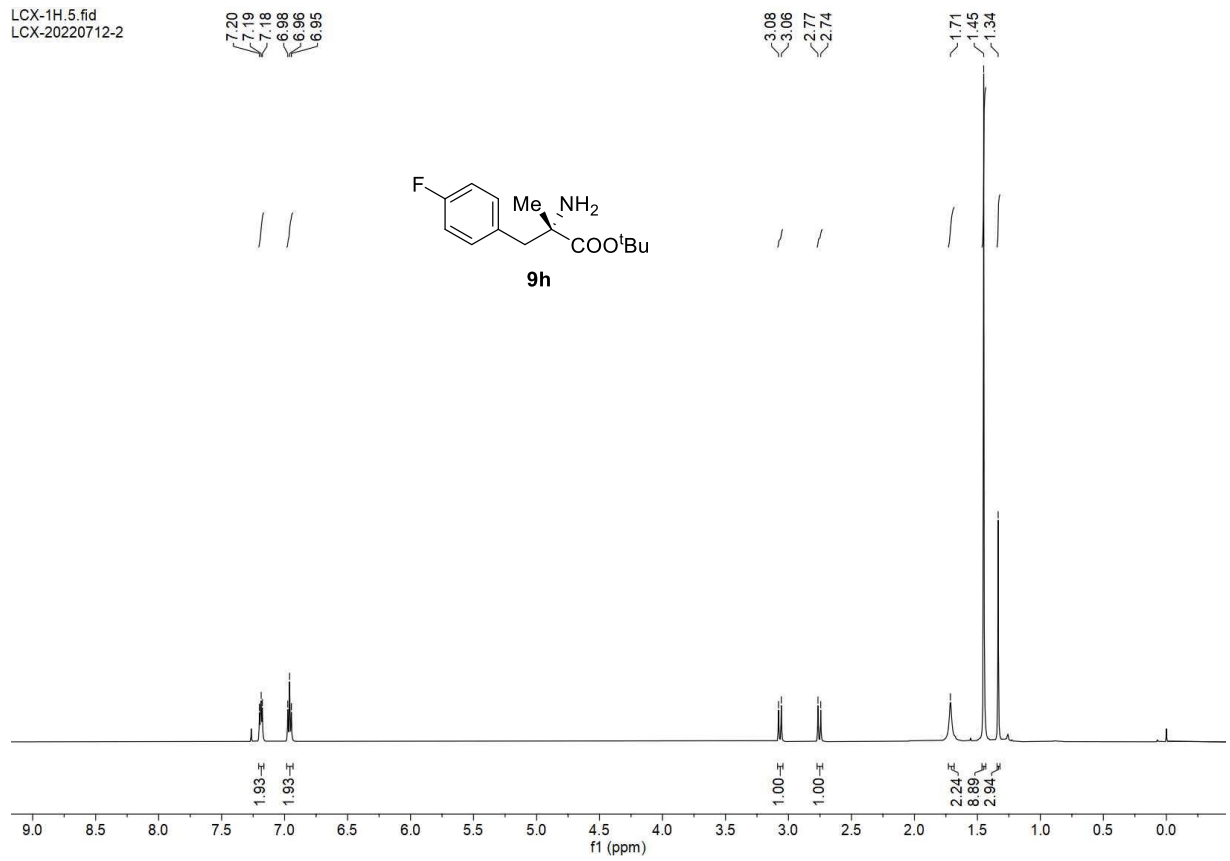

SHR-13C.40.fid  
SHR2210-16-2

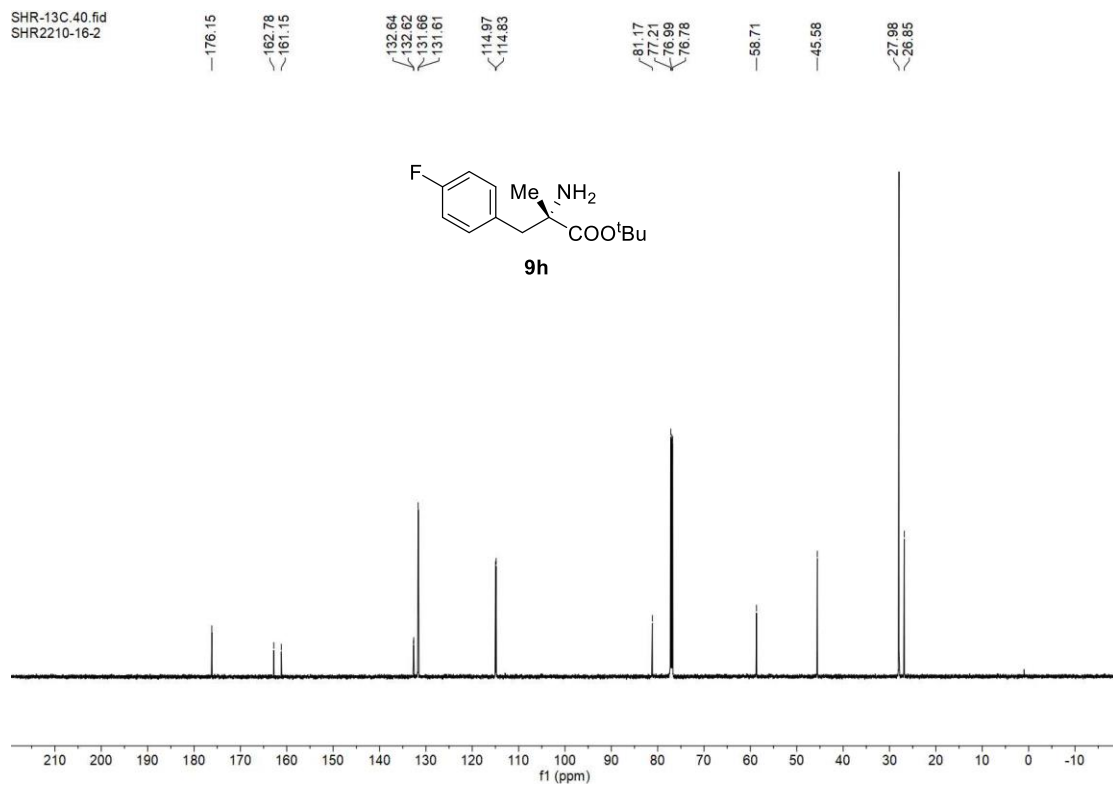

LCX-1H.30.fid  
LCX 20220710-1

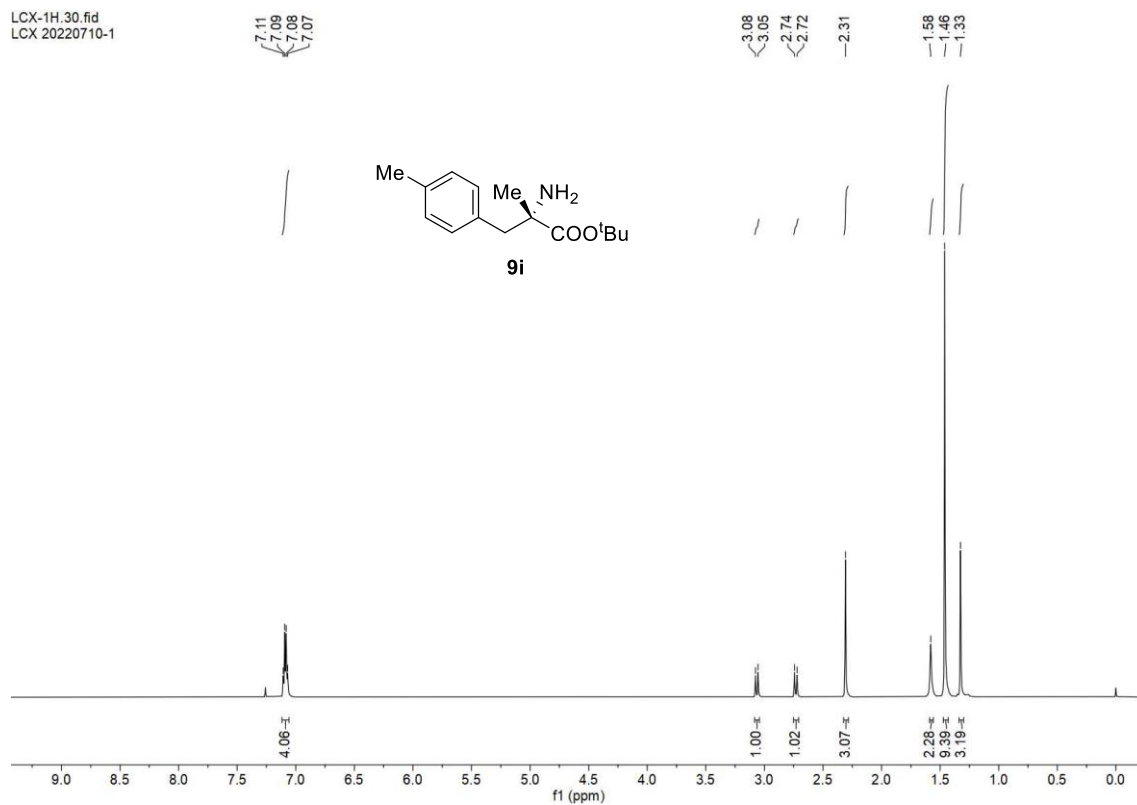

LCX-13C.15.fid  
LCX 20220710-1

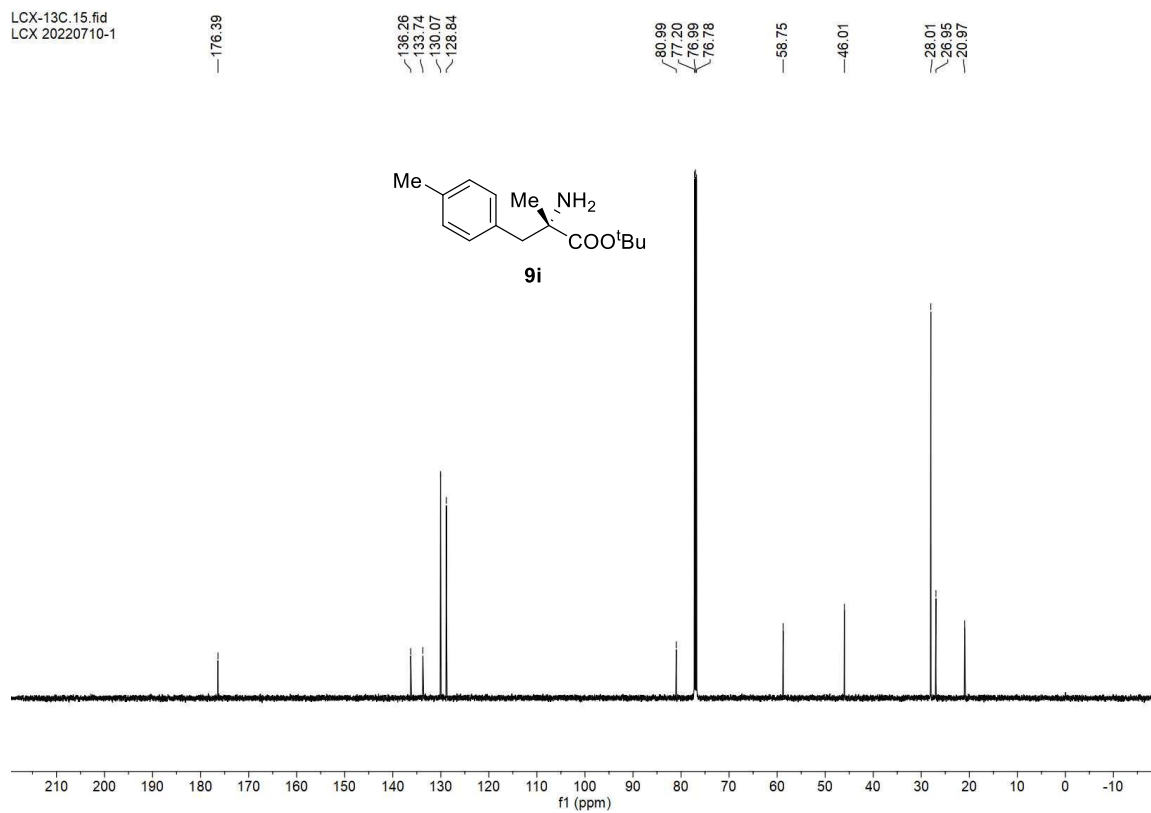

LCX-1H.8.fid  
LCX-20220711-1

7.30  
7.28  
7.26  
7.15  
7.14

3.09  
3.07  
2.76  
2.74

1.70  
1.46  
1.35  
1.30

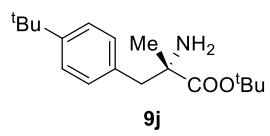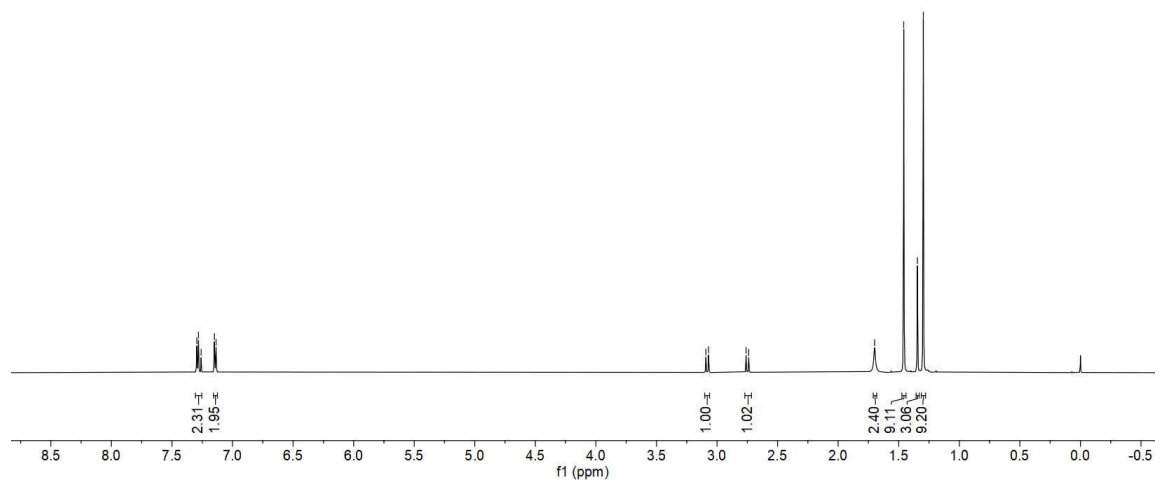

LZX-13C.7.fid  
lzx20220711-1

176.27

149.62

133.65  
129.89  
125.07

81.09  
77.20  
76.98  
76.77

58.83

45.84

34.38  
31.34  
28.00  
26.89

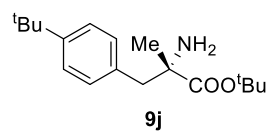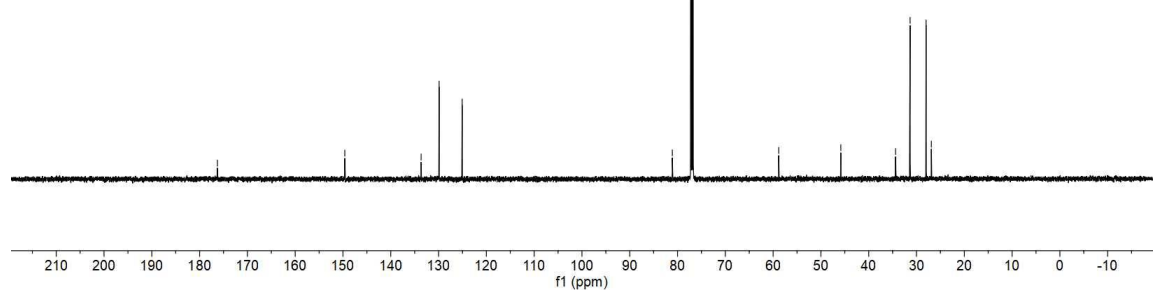

LCX-1H.33.fid  
LCX20220726-1

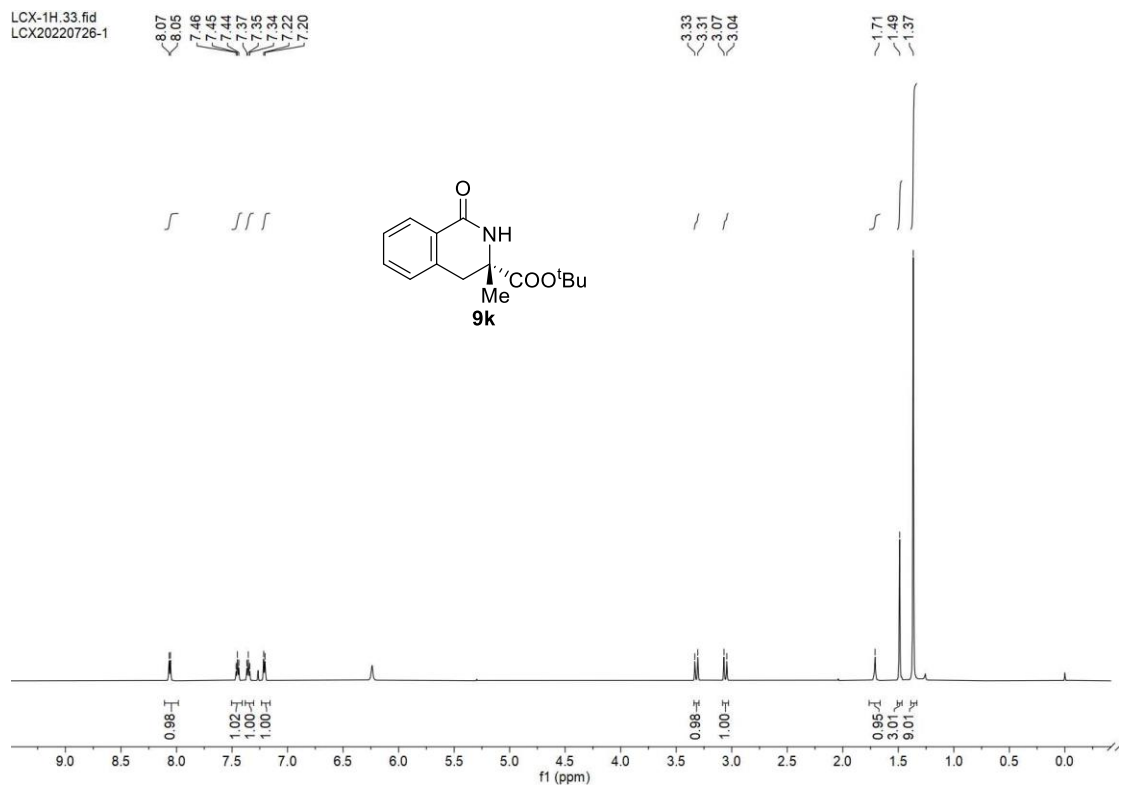

LCX-13C.17.fid  
LCX 20220726-1

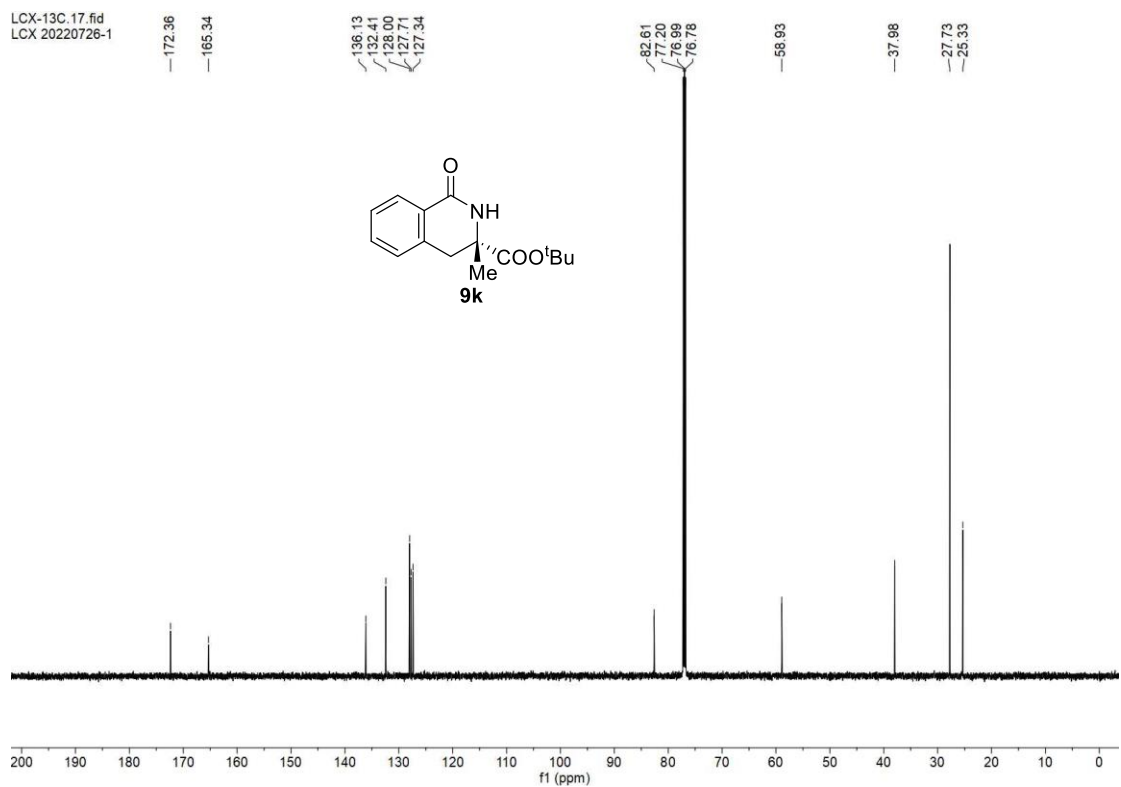

LCX-1H.25.fid  
LCX20221008-2

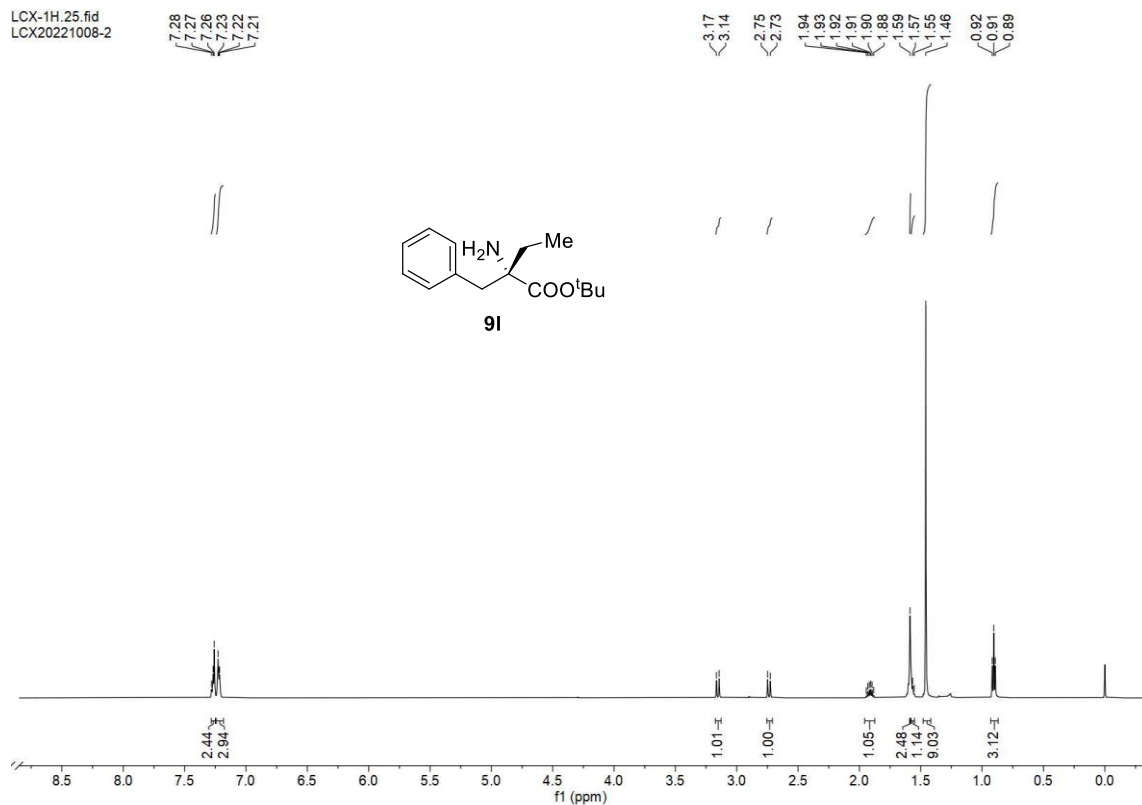

LCX-13C.25.fid  
LCX20221008-2

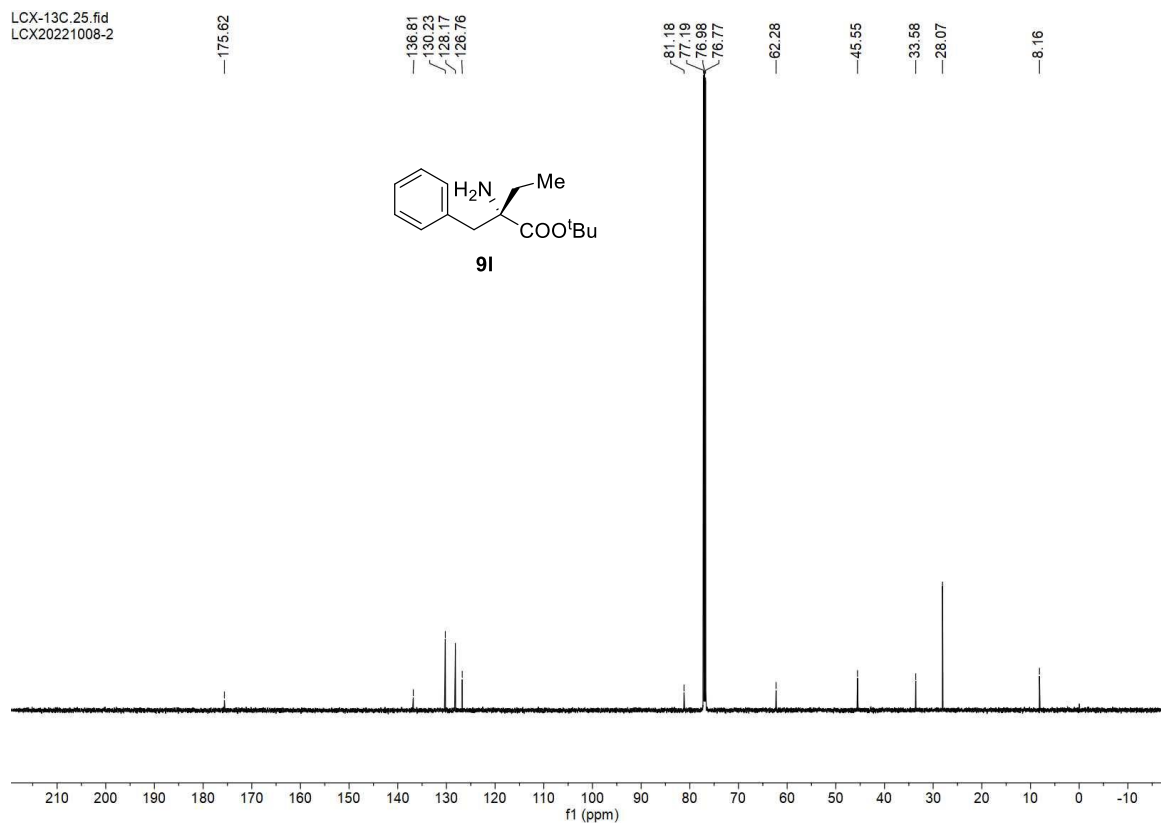

LCX-1H.27.fid  
LCX20221007-6

7.28  
7.27  
7.26  
7.23  
7.22  
7.21

3.16  
3.14  
2.74  
2.72  
1.86  
1.85  
1.83  
1.81  
1.81  
1.58  
1.56  
1.55  
1.54  
1.53  
1.52  
1.51  
1.45  
1.42  
1.41  
1.40  
1.39  
1.23  
1.22  
1.21  
1.20  
0.94  
0.92

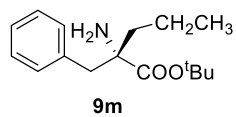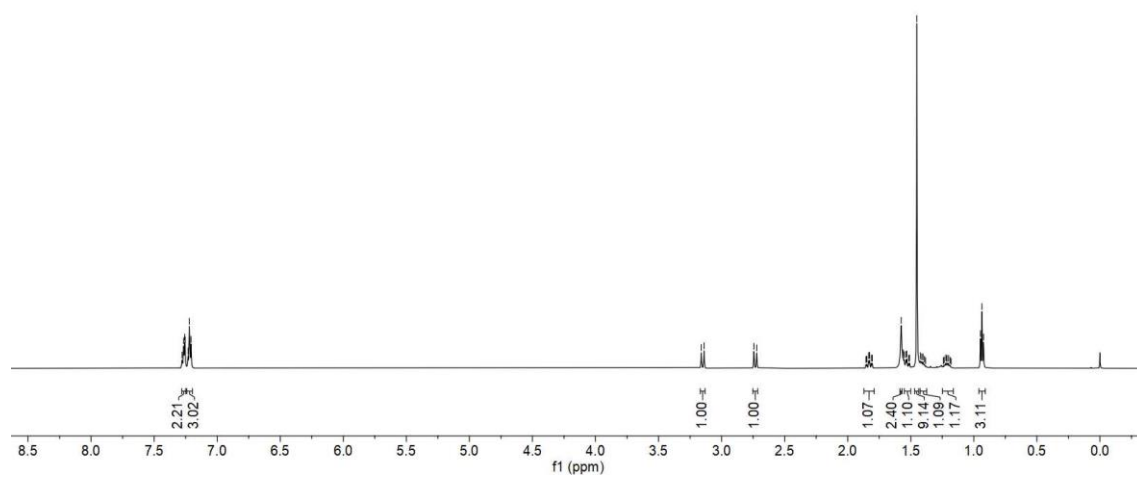

LCX-13C.27.fid  
LCX20221007-6

175.77

136.76  
130.24  
128.16  
126.76

81.15  
77.19  
76.98  
76.77

61.98

45.85  
43.17

28.07

17.24  
14.43

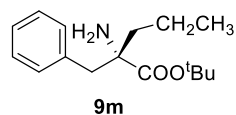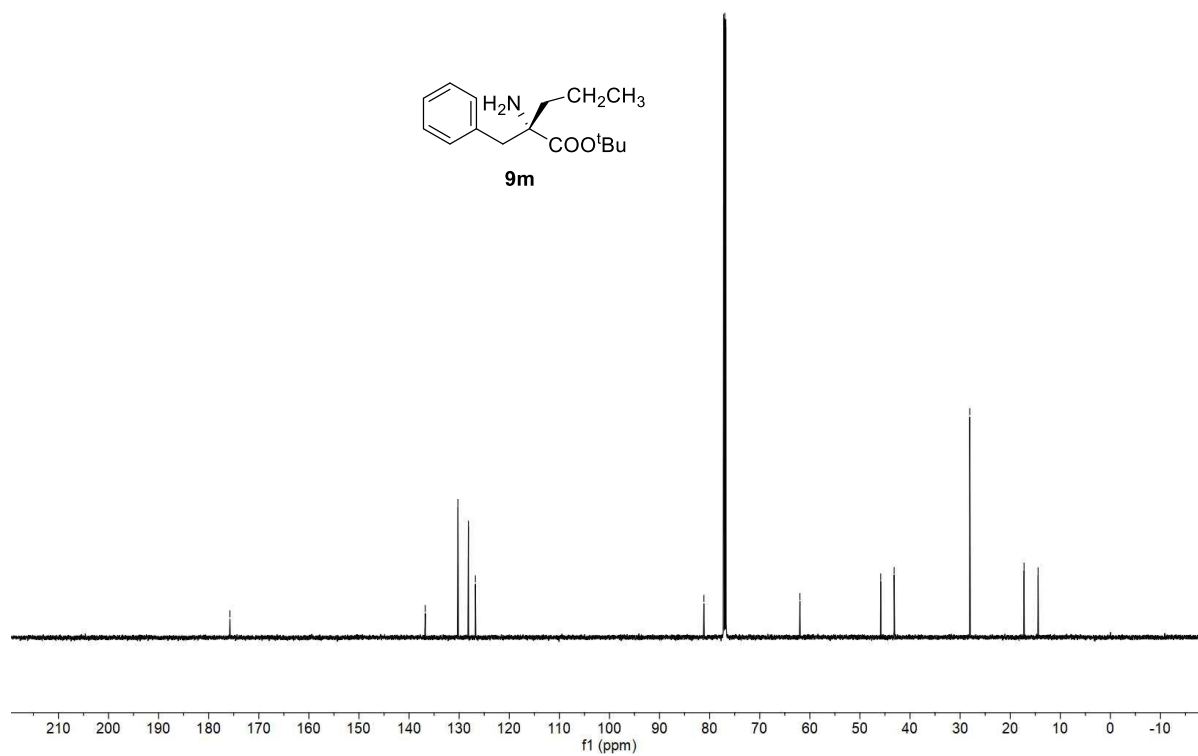

LCX-1H.28.fid  
LCX20221007-7

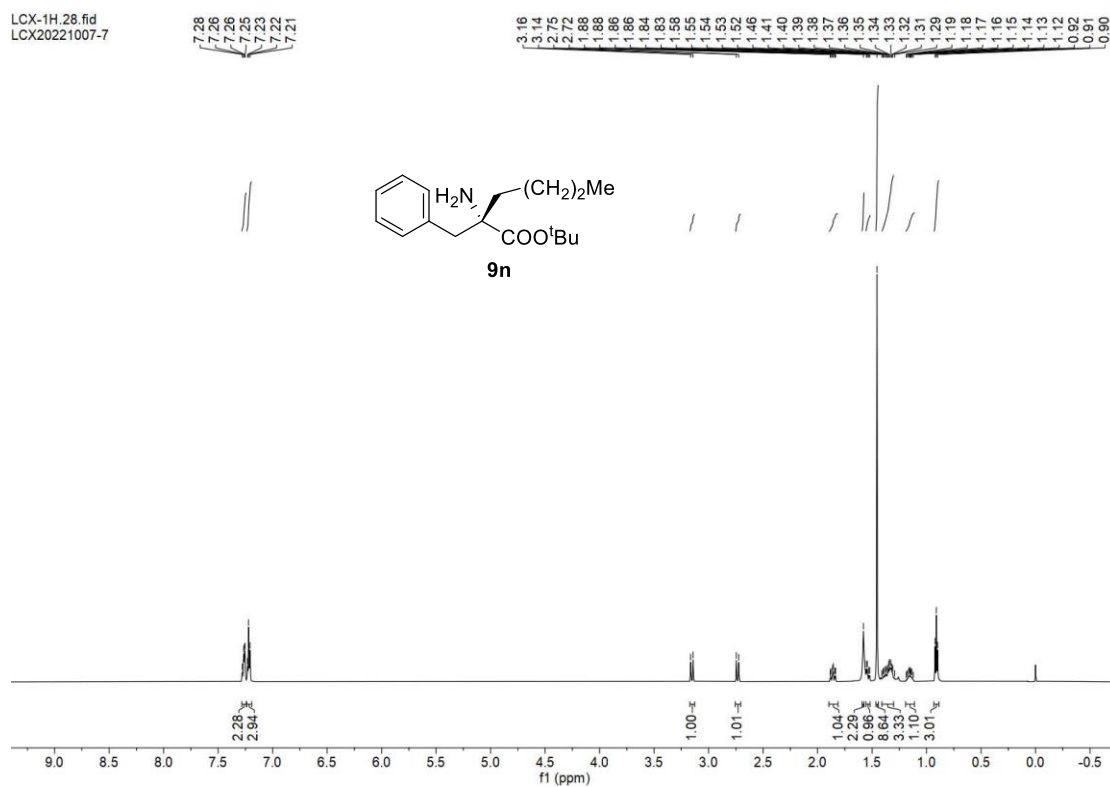

LCX-13C.28.fid  
LCX20221007-7

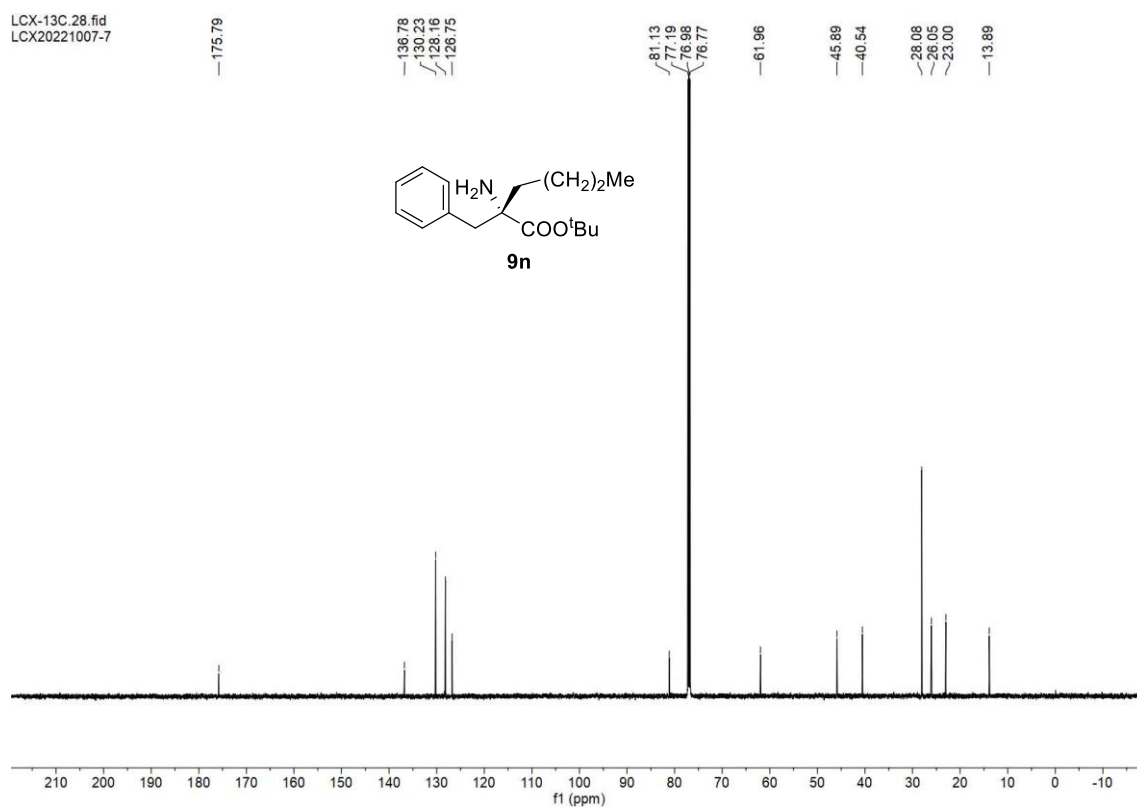

LCX-1H.29.fid  
LCX20221007-3

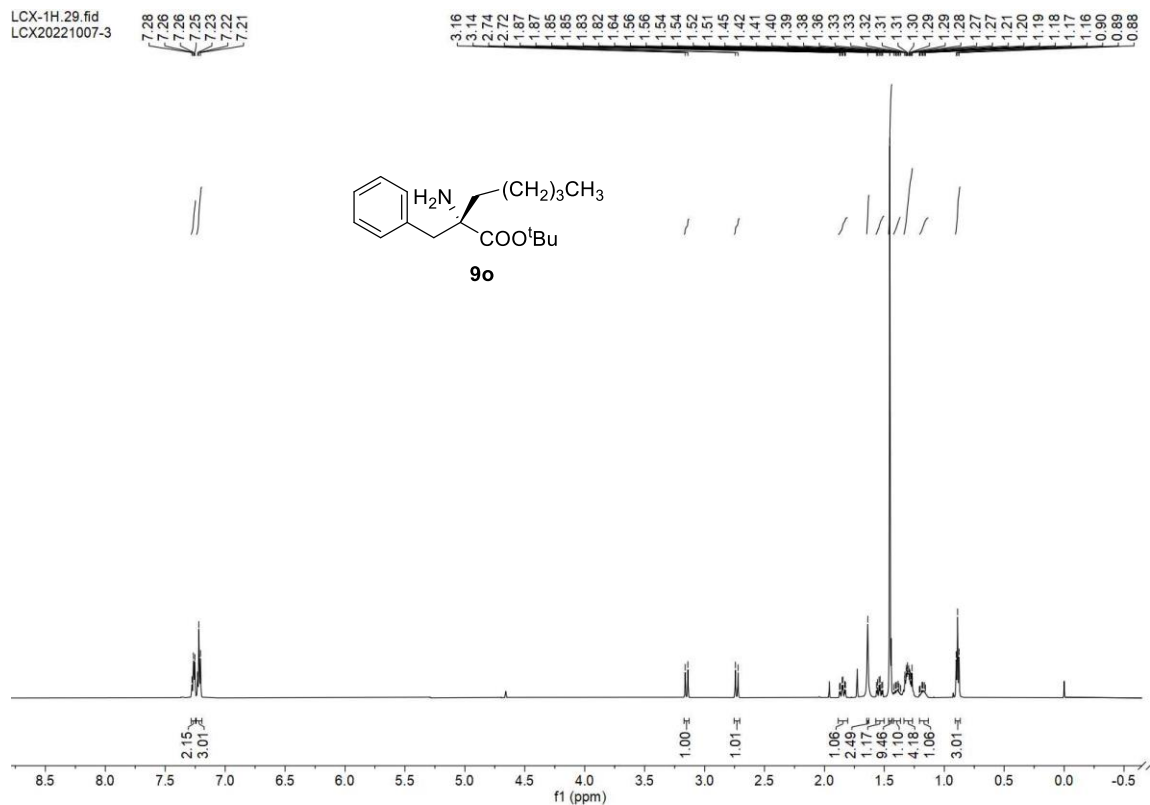

LCX-13C.29.fid  
LCX20221007-3

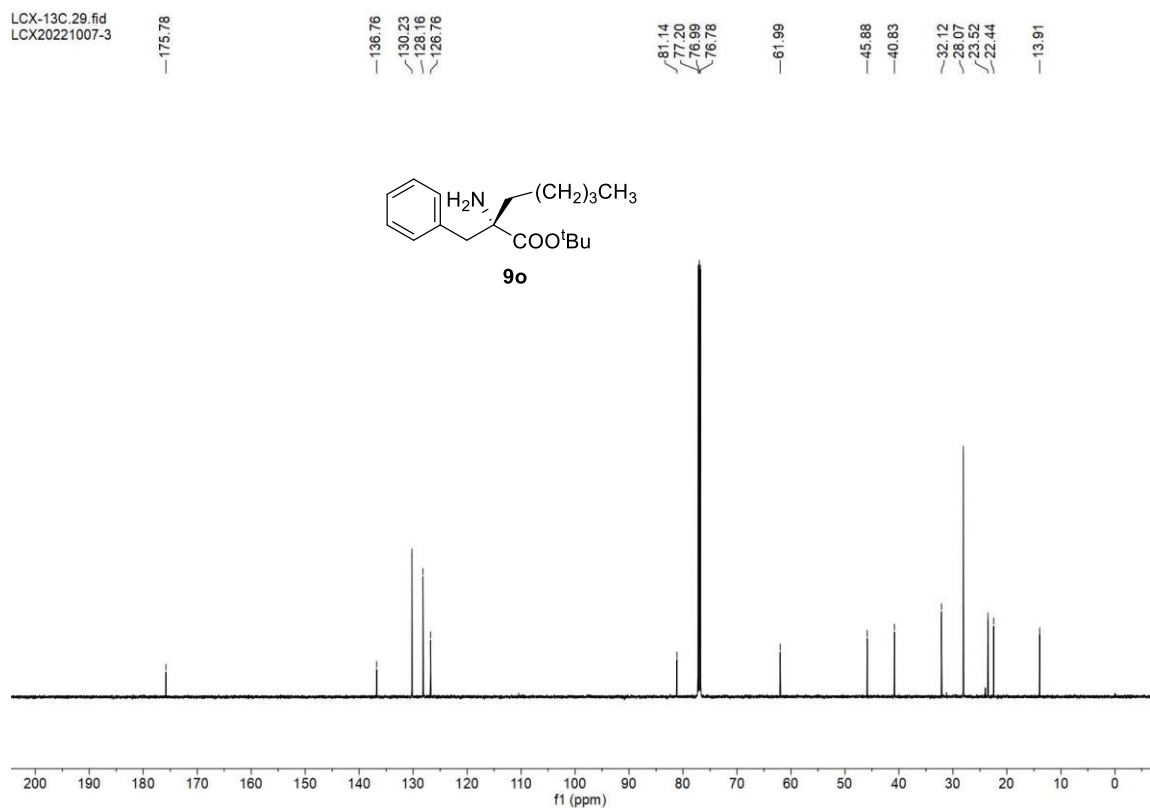



LCX-1H.26.fid  
LCX20221007-4

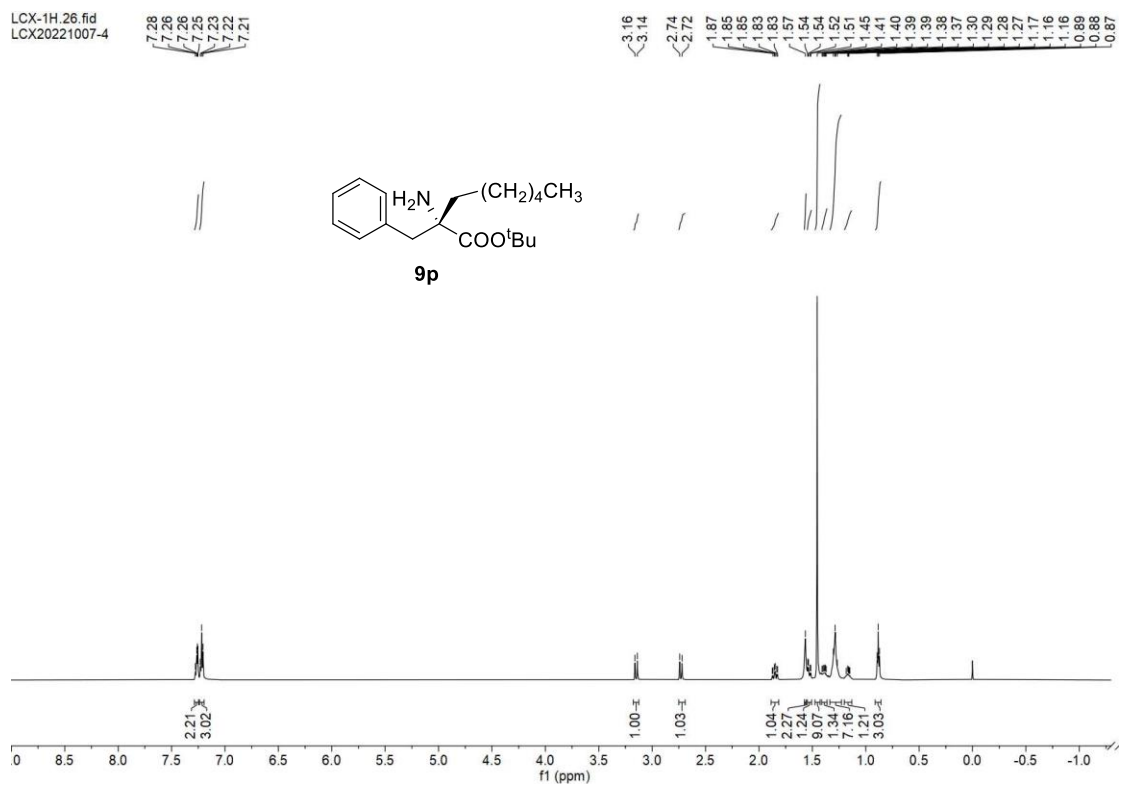

LCX-13C.26.fid  
LCX20221007-4

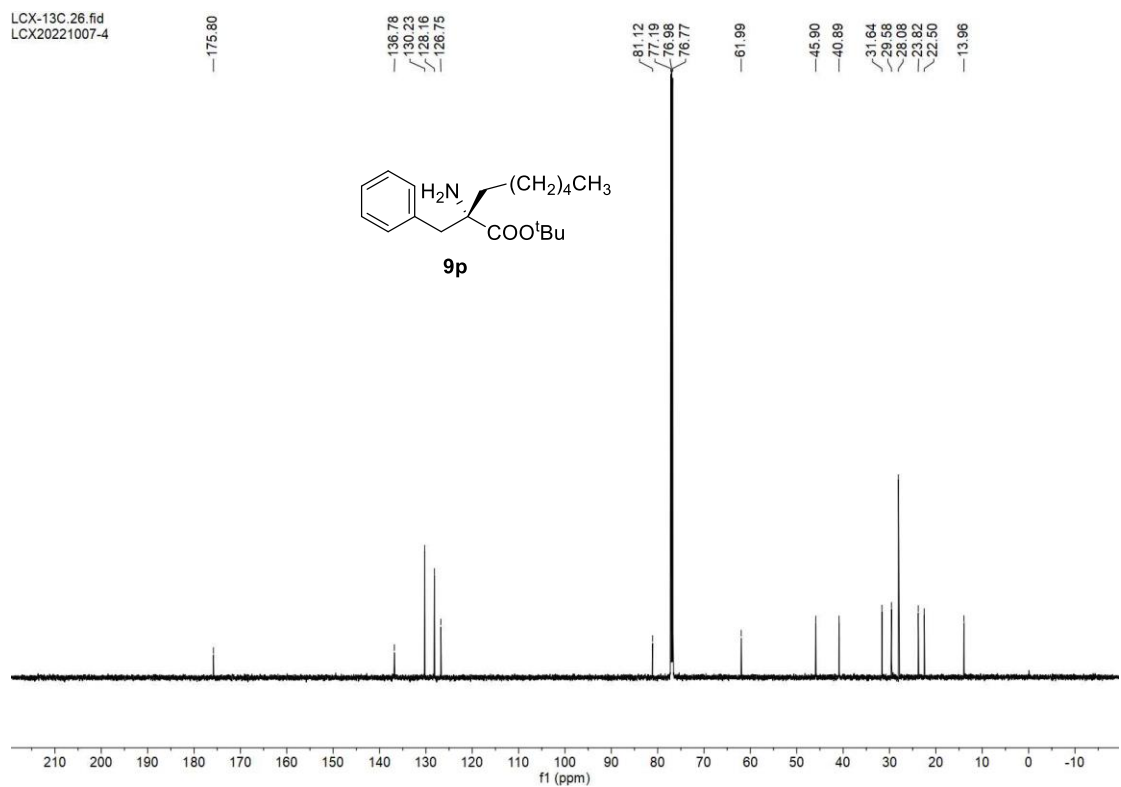

SHR-1H\_91.fid  
SHR22010-3-3

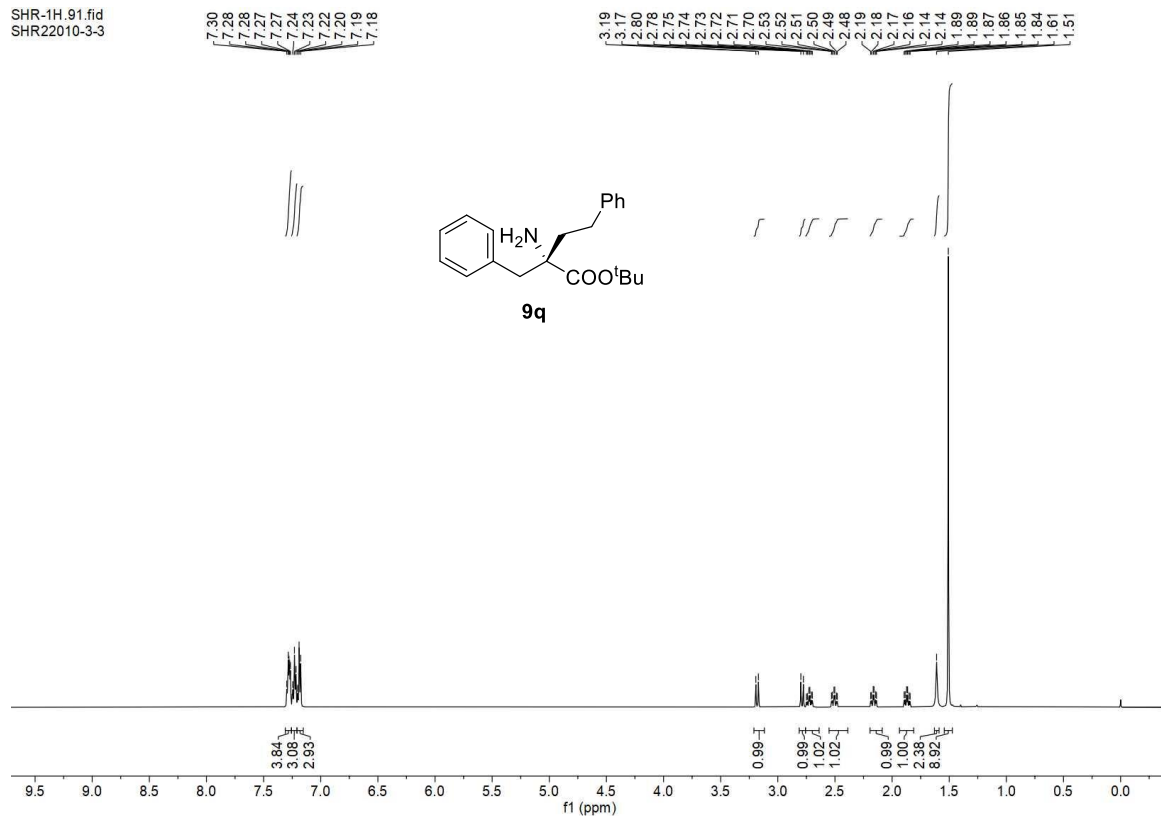

SHR-13C\_34.fid  
SHR2210-3-3

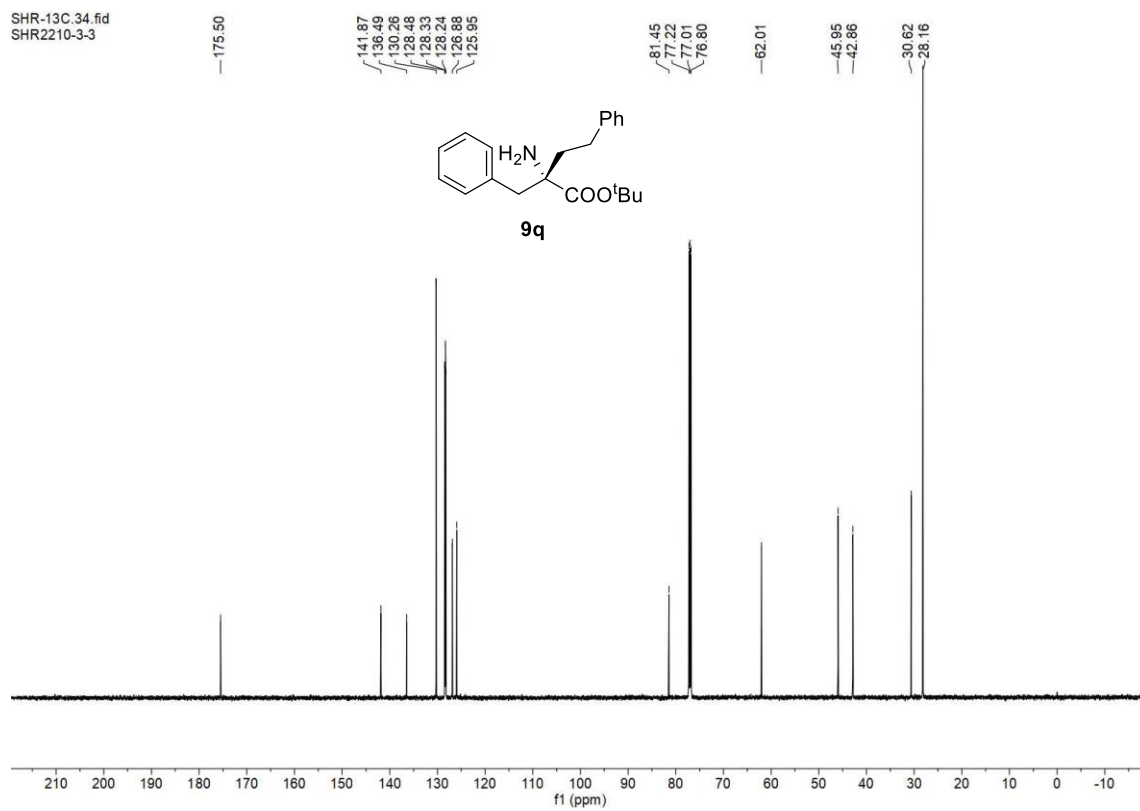

SHR-1H.89.fid  
SHR2210-3-6

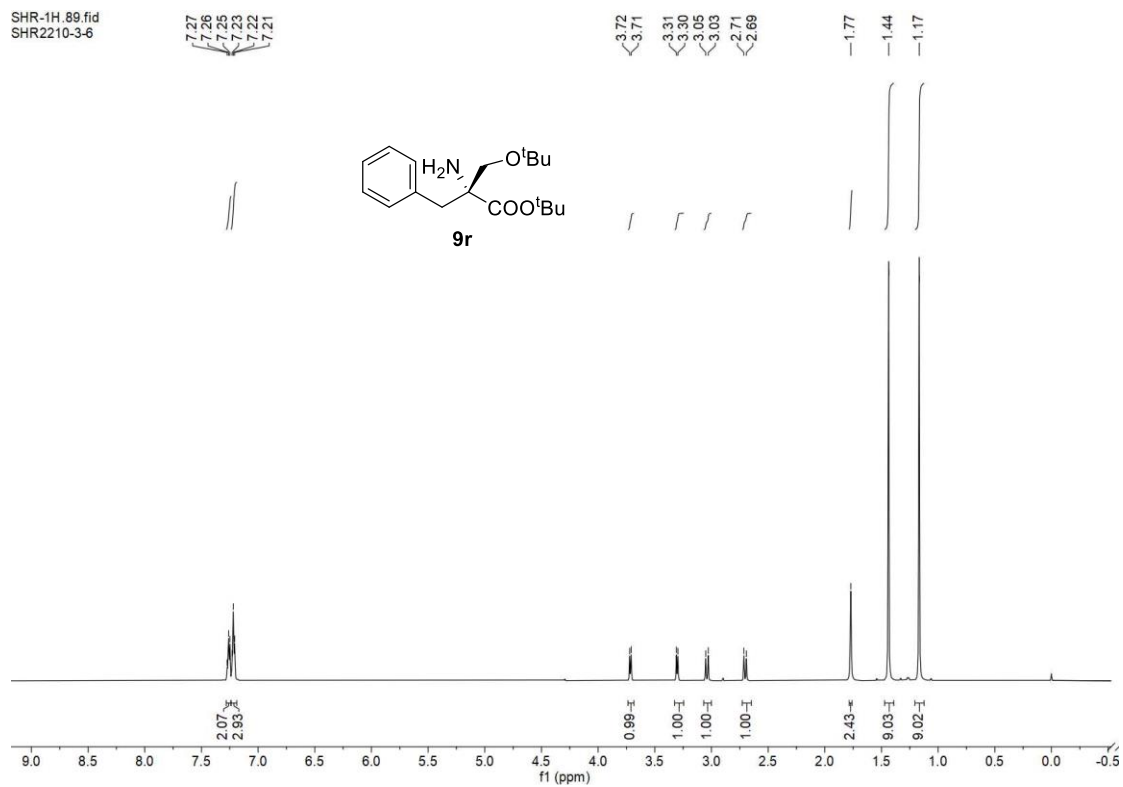

SHR-13C.35.fid  
SHR2210-3-6

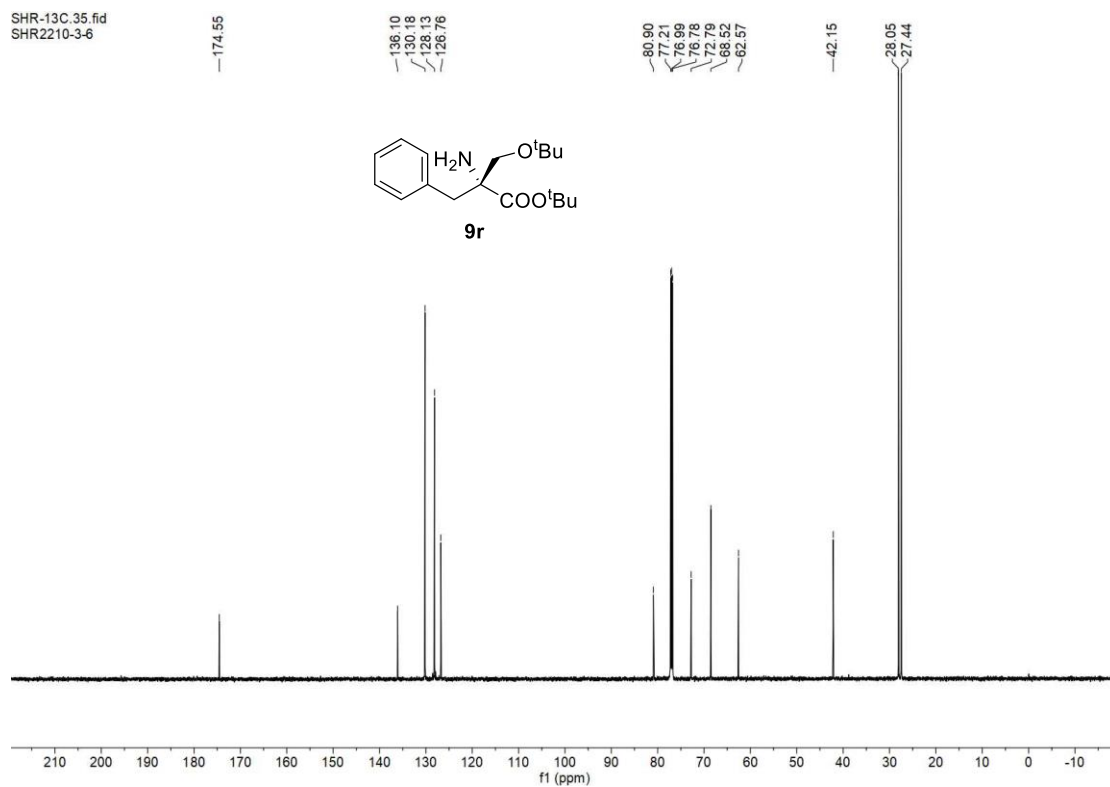

Supplement: d3sc01294h1.pdf [file d3sc01294h1.pdf]
